# Supplementary material for: Interactions Between Temperature Variability and Reproductive Physiology Across Traits in an Intertidal Crab
Source: Front Physiol. 2022 Mar 8;13:796125. doi: 10.3389/fphys.2022.796125 (PMC8957995; doi:10.3389/fphys.2022.796125)
Supplement: Supplementary file 3 [file Data_Sheet_1.xlsx]

## Sheet: Probe Sequences
Type	Transcript_ID	Transcript_Annotation	NanoString Probe Sequence	Direction	Position	Whole Transcript Sequence	Comments
Housekeeping	15_8	Actin	CTGAGCGAGAAATCGTTCGTGACATCAAGGAGAAGCTGTGCTATGTTGCCCTGGACTTCGAGAATGAGATGGCTGTTGCTGCCGCCTCTTCCTCCCTCGA	+	194-293	CTGTCCCTGTACGCCTCTGGTCGTACCACTGGTATCGTGCTCGACACTGGTGATGGCGTTACCCACGTTGTTCCCATCTACGAGGGTTATTGCCTTCCCCACGCCATCCTCCGTCTGGACTTGGCTGGCCGTGACCTCACTGCCTACCTTACCAAGATCATGACTGAGCGTGGTTATTCCTTCACCACCACGGCTGAGCGAGAAATCGTTCGTGACATCAAGGAGAAGCTGTGCTATGTTGCCCTGGACTTCGAGAATGAGATGGCTGTTGCTGCCGCCTCTTCCTCCCTCGAGAAGTCCTACGAACTTCCTGATGGTCAGGTCATCACCATCGGCAACGAAAGGTTCCGTGCCCCTGAGTCTCTCTTCCAGCCTTCCTTCCTGGGTATGGAATCTGTT…	positive strand alignments
Housekeeping	187_1_CAYC_CAYF_CCAG	Tubulin	TGACTACACACACTACATTGGAACATTCAGACTGTGCCTTCATGGTTGACAACGAAGCAATCTATGATATCTGTCGTAAGAATCTGGACATTGAAAGACC	+	664-763	GTACTGAGCTGCGCTAACTCCACTTCGTTAGACGCGACCCTAGTCTCCCTTTAAGTTACCCCTCCTCCTCTTCTCTCGTCAAACCATCAATTGTCAACATGCGTGAGTGCATCTCTATCCACGTGGGTCAGGCTGGTTGCCAAATGGGTAATGCCTGTTGGGAGTTGTATTGTCTTGAACATGGCATTGCTCCCGATGGCTCTATGCCCTCCGACAAAGCCCTGGGAGGTACTGACGACTCCTTCAACACCTTCTTCAACGAGACTGGGGCTGGCAAACATGTACCTAGAGCTGTGTTTGTTGATCTGGAGCCTTCAGTAGTGGATGAGGTGCGTACCGGAACCTACAGACAACTATTCCACCCCGAACAACTCATCAGCGGCAAGGAAGACGCAGCCA…	positive strand alignments
Housekeeping	comp61175_c0_seq94	WD repeat-containing protein 5	AACCCTTCCTCAACTATTGATGGTTGGAATCAGAATGATGCTCAGAAAGGTGTAAAGAGGAAAGCAGACGCGATGAACCCAATGATTGGGAATTCAACGT	-	3410-3509	GCTGCTGTTGTTGTTGCTGCTGCTTTTTCTGCTGCTGTTGCTGCAGCTGTTGCTCTAGCTGTTGTTTCTGTTGTTCCAGTTGTTTTTGCTGTTCAAGAAGCTTCTGCTGTTCAAGTTGCTTCTGCTGTTCTAGCTGTTGTTTCTGAAGCTGCTGTTGTTTTTGCTGTTGTTTCTGTTTCTCTTGTTCCTTTTGATCTTGCTGTTGCTTAAGCTGTTCTTGCTTTTGCTGTTCTTGAAGTTTTTGTTCTTGTCTCTGCTGTTCTTTTTTCTGCTGTTCTTGCTTTTGCTGCTCTGCCTGTTTCTGCTGCTCTGCTTGCTTTAACAATTCTGCTTGTTTCTGTTGTTCTGCCTGTTTCTGCTGTTCAGTCTGCTTCTGCTGTTCTGCCTGTTGTTGTTGTA…	~700 bp region of homology to several WDR5 genes in positive strand orientation (XM_008497261.1;XM_005493230.2;XM_005421257.1)
Housekeeping	comp61968_c0_seq6	Partitioning defective 6 homolog gamma	CTAGAGAGAGTACCTGGCATCTTTATATCTCGTCTGGTACCTGGTGGTCTGGCTGAAAGCACTGGACTCTTGGCCGTTAATGATGAAGTCCTTGAAGTTA	-	848-947	TCTTATATTGAGGACCCACTGTATCTCACTTTCAGTATGGGTGGAATTCTGTGAGACTGCACAAACTCATGACCTTAATAACAGTATTTTCCTAGTAAGTGTTTCAATACAACAACATAATACAAGATATTCCCTAGGCAGGCTTATTTATCTAGGTAAAAAATAAAGGCATTAAGATACAATATTAACAACAATTTGTAAACTTTATGATTCATTCAAGTTTAGAGAAAATTCATTACTGTACCTGAAGCAGTATATGTTAGGCAGGTCATATAAATCACAAAGTGAGGAAAAAGTTGTTTGACTCATCAAACATGATCATATAGCAAGGCTTTCTGAAAATAAGAGTGACATATATAAATCATCCAAGTGAAATAGATTAGATGCCTTTTTATTCAG…	negative strand alignments
Housekeeping	comp62062_c4_seq7	Paired amphipathic helix protein Sin3a	AGCTGTTGCTTTACGACTCAAGCCTAAGAATGAAATAGCTGTGGAAGACTATTATCCAGCAATGCTCGACATGGTAAAGAATGTGTTGGATGGTAACCTG	+	1266-1365	TCTCTCTCTCTCTCTCTCTCATCACAATAACCCAAATAACTCTAACTTAGCCTACCTGTTCCATCACTCTCTCGTTAAAATTAAGAGCCAATAGCAATTTCTAAATAGACATAATAGTACAGAAACAGTTACTGCAGCATTGGACATACACGCTAGTTGGTCGGTATTATTTTCTTCATTATTATTTATGTTATTCAGATTTCTTGACATGAACAACAACAACCGTCATCTTATCTACACTAAAATTACTCATCTTTCGCCACCACCACCACCAACAACAACAGCCTACAAGAACAAGAACAGGAGGACCCCATATCACCCACCACCTCCGACGACAATGACACCAGCCTACAACAACAACAGGACTCGCAGATTGTCGGCATAATGACGCGTTCGAAA…	positive strand alignments
Housekeeping	comp62406_c1_seq15	U2 snRNP-associated SURP motif-containing protein	AGTGCAAGTTTGATCGGGGTGGAGTTGATCCTCAACCCATAGTAAACCAGATTGAGGCCGCTGCCAAGAAGAAAACCACCAAGACAATTTCAGTCCCTTC	+	3095-3194	TGGTTGACTAACATCTGCACCTCACAGCCACAGTTTCACCCCCCAGCCTTACTCGACACGTATAATATTCTCTCCAACGCTGTAATCCCCTCTAGTATAGGAAATATTTACTTGCGTATAGCTTGATAGGTAATCTGTAATTTTTAGTTTCATCCTGTGGCAGAGTTTTTTCCCTCTTCTTTTTTTAATGGTAAGAGCCCCGTTTTTAATGCATCGATCACGTCTCCTGCCGCGACCGGCTTGTGGAAGGAACCCCCCTCCAGCCGGGCCCTCGCTGCCTGGCCTCCCACACTCTCTTACACCGCCATCGCCACCATTATAGTGTAACCCATTAACATCTACCTTGACGTTTTTCAGAGAAGGGGTTGTGTTATTTGACTTATTTAACGGAAACCAAAT…	positive strand alignments
Housekeeping	comp63344_c0_seq12	Poly(U)-binding-splicing factor half pint	TCGTCTGGTCAAGGCCGAGCTGTATGATCAGAACATGTACAATCACAACGACCTCTCTGGCTGAAGGGTTTATCACACGTGCATCCGTTTCCTTCTTCCT	+	3361-3460	CAAAATGGCGACGGAGGAATCTTTAGCAGCGCCTCCAGTCCTCAGTAATGGTCACACTATGGTGAACGGGGAAGTAGAAACAGACGAACCTCCAGAGAAGAAGATGAAAGTTGATATGGGTTGGCCCGACTCTAAGAATCGTTCCGTCCTTTTGACCGAAGCAGATCATCCAAATGCCGCCCACCAGATACCTCCAAAAAAAAAATTATTATATACATTTATGTGCTGTATTTTAGCAGAGAAATGTTCCTCTTTTTATAAATGCATATCGTCGTTATAGGGCAGACTTAAGCCATCATGACCATAATCCATTCAGACTTATATATACTACTTGAGATCAGATTGCCACTTGTTAATTAGAAATGTGTAAACAACCAAAACATAAGAGCAAAGCAAGTT…	positive strand alignments
Housekeeping	comp64151_c1_seq55	Aldehyde dehydrogenase, dimeric NADP-preferring	CATGTATTGCTCCGGATTATGTCCTCTGCACTCGACAGGTACAAGACAAGTTTGTGGAGAAAGCAAAAGAGATACTAAAGGAGTGGTATGGAGATGACCC	+	790-889	CAGCAGTCGAGGTGGGAGGATATCACTCTCTCTGGGATTGTTGGAAAGTAATGACAGAAAACATGTCGGAGTTTGAACAGGTGGTAAACAAAGCCCGAGAGGCCTTCCGCTCCGGCAGGACTCTCGATGTAGAGTTCCGCAAGAAGCAGTTGAAGGCCCTCCAATGCATGTATAATGAAAATGAAGATGCCATATGTGCTGCTTTGGCAAAGGATCTCAGAAAGCCAAGACAAGAATCAATCCTGCTAGAATTGAACCTGCTGAAGGACGACCTGAGGTACATGTTGGCACGCATAGACGACTGGGTCAAGCCAGAGAAGATCAAGACTAACCTGGTGACCATGTTCGACAGTCCAATGATTTACCATGACCCATACGGAGTGGTGCTGGTCATGGGAG…	positive strand alignments
Target	0_0_CCAG28737.b1_CAYC_CAYF_CCAG	Acyl-CoA synthetase family member	ATCACACCTTGACAGACCTCACGATTACTGGAACAAAACTCACCTTTTTCCCGTTCGGGGAAATTGAGAGCTTCACCCAACTGAAATACCTGAATCTTGA	+	54-153	CAAAATGGGGGGAAGTTTAGAGACAGGGGTTATGAATGCCTTTATGTCCTGCTATCACACCTTGACAGACCTCACGATTACTGGAACAAAACTCACCTTTTTCCCGTTCGGGGAAATTGAGAGCTTCACCCAACTGAAATACCTGAATCTTGAGAACAATGATATAACAGGATTCCCAACCCTGGCTTCGGCAACCCTACGAGAACTTCCACTAGGATT	Weak homology to sp|Q9GV46.1|LUCB_OPLGR
Target	1252_1_CAYC_CAYF_CCAG	WAP four-disulfide core domain protein 5	GTGGCAGAGGTAATGCCTGCTGCTACGACAACTGTGGCAGGAGTTGCAGACAGAAGTGCCCAGCCCCGGACTCGTTTGGTCGTCAGTGTACCCATATTAA	-	396-495	AAATGCTTGCTATAACTGTATTTCAAATAATAATAATAATAAATGGAGTTTTGCATCAACAATACAGCTCTTTTTTATACTATATTGGCTTAATCACTTGCTGCTAATTGTTATATTGGAGAAAAAATTAATAAAATCTTAATTATACTATTACTTTCACTAGAGTTAGCAATAATTTAATCCTGGCAAATAATAATAATAATTATTATTATTATGTCAAACACGATAAGGGACAGATATAATTAATAATAATCTTGTGAAATTCGCAGTGAATGAATACTGAACAGTGAAGCCAACAACTTGCACATCATCATAAACCAATTATGCTATGCTGTAATTATGTATTAGGCAGGGAAGGCCATGTGGTACAATAAAAATTAATAAAACATCTTCAGATAA…	Weak homology to gb|ABW88999.1|
Target	13341_0_CCAG36642.b1_CAYC_CAYF_CCAG	AMPK-5	GACCTCAAGCCAGAGAACCTCCTCCTCGACCACAACCTTCATGTCAAGATTGCAGACTTTGTCTGTCAAATATCATGGTTGATGGGGAGTTCTTGCGTAC	+	247-346	ATGGTGAGCAAGATCAAGAGAGAGATCACCAATCTCAAGCTGTTTCGTCACCCTCATATCATAAAACTGTACCAGGTTATTAGTACCCCCACTGACATCTTTATGGTGATGGAATATGCTTCAGGAGGAGAACTGTTTGATTATATCAAGCAAAAGGGCAAGCTGAAGGAGTCAGAAGCTCGAAGGTTCTTCCAGCAGATAATTTCAGGGGTTGACTACTGCCACCGTCATATGGTGGTTCACCGTGACCTCAAGCCAGAGAACCTCCTCCTCGACCACAACCTTCATGTCAAGATTGCAGACTTTGTCTGTCAAATATCATGGTTGATGGGGAGTTCTTGCGTACCAGTTGTGGCTCTCCAAACTACGCTGCGCCAGAGGTCATCTCAGGCAAGCTGT…	positive strand alignments
Target	14_5_CAYC_CAYF_CCAG	Phosphoenolpyruvate carboxykinase [GTP], mitochondrial	TACTTGTCAGTCTTCATAATTTCCAAAAAGCTCTGGATCTACATCCACAAAATGTATCAAGCAATTAGATAATGATCACTTCACTAAAGTTACTCACCAA	+	484-583	AACCCGCGCTCTACCCAAGATCTTCCATGTCAATTGGTTCCGCAAGGACGAAAAGGGCAGCTTCATCTGGCCTGGCTTTGGTGAGAACGTGAGAGTGTTGGACTGGATCCTGCAACGTGTGGAAGGTAATGACGTAGCAGAAGAGAGTGCTGTTGGTCTTCTGCCTCGCCCTGGCTCTCTCAACTTGGAAGGACTCGACACTTCTACTCTGGACACTCACGAACTCTTTCGTCTACCAAAGGGCTTCTGGGGGCAGGAAGTTCGAGCCATTGCCAAGTATTTTGATGAGCAGGTGGGCGATGATCTTCCTAACGAGATCCGGGAGCAACTCAAGAGCCTTGAAAAGCGGGTGGAGAAAATGTAAAAAAACAAACAACCAAAGACAACTGGAGGTGGAGT…	positive strand alignments
Target	1432_1_CAYC_CAYF_CCAG	Hsp40	AAGATGAAGATAACAAGATCAGTGTTGGCCAGTGACGGGCGGTCAACACGCCGGGAGGAGAAGATTCTAACCATTGATGTCAAACCTGGGTGGAAAGAAG	+	692-791	GGGGGGATTCAGAAAGCACACAGCAAGAGACAGGTGTGTAGGTGTTAGCACAGTCCAACCCAACAAGCAAAGGGCTGTCATAATACATATATCTCAACACAACAGGACTCACTGACTTGTAAATATGGGGAAAGATTATTACAAAATTTTGGGGCTGTCCAAGGGCTCCTCAGAAGAAGACATAAAGAAGGCCTACAGGAAGATGGCCCTCAAGTATCATCCAGATAAAAACAAATCCCCAGATGCAGAAGAGAAGTTCAAACTTGTGGCAGAAGCTTACGAAGTGTTGAGTGACAAGAAAAAGCGTGACATATACGACCAGTACGGTGAAGAGGGTTTGAAGGGAGGTGTGCCAGGTTCAGGAGGTAATGAAGGACAACATTTCACCTACACCTTCTC…	positive strand alignments
Target	14392_1_CAYC_CAYF_CCAG	Complement C1q-like protein 4	TCTGGAGACCGAGTACAACTTCGACTTACACAAGGCACCATCTATGAACACCCAGGCTCGGGAGGCATACACTTCCTTTACTGGATTTCAGATTTAATGC	-	398-497	AAACATCCAAGTTATTATATTTACAACACAAGACAATTTTTACACAGGAATTATTCAGATAAATACACATTAAATCCTAAAAACATTAAATGACATTTATCTTGCATTAAATCTGAAATCCAGTAAAGGAAGTGTATGCCTCCCGAGCCTGGGTGTTCATAGATGGTGCCTTGTGTAAGTCGAAGTTGTACTCGGTCTCCAGATCTTAGTCGGAGTACTGCCGAGTTACTGCCGTGTTCAAAGGTGTTACTTGTACCGTAGGCTGTCACTCTGTACGCACCGTTTCGTATCAAGGACATGGTAAAGTCACTTGTTCTGCCACCAACAGCATGGAAGGCAAAGTAATATAATCCATTACGTGGGGCTACAAACCGGTCATTCCTCCAGGCTCCACCAGCG…	ref|XP_012670805.1|
Target	14490_0_CCAG5543.g1_CAYC_CAYF_CCAG	SIR2	AGAAATCCTCAGATGCGAATGTGAAGGGCTAGTCAAGCCTGACATCGTTTTCTTTGGTGAGCAGCTCCCGAAAAGTTTCCATACTGCTCCCGCATTGATG	-	410-509	ATGAACAAGCTGATCCCTCAAACAATCAAAACTTCCAGTCCGCCTTTTCCATAATAGTCTTCACGCTGTCTTCGATATTGTCCTCCATCCAAAGCTTATCATTTCTCTAGGGTAAGCTGTCAGTTTTGTTGATGAGAACAACCGGAACGGTTTTTTCGATGAGCTGGGGCAAAAATGCGAAAGGCATCACTGCAAGGGCAGTTCCCATGATGATGACCAGATCAGCCTTTTGCATCAATGCGGGAGCAGTATGGAAACTTTTCGGGAGCTGCTCACCAAAGAAAACGATGTCAGGCTTGACTAGCCCTTCACATTCGCATCTGAGGATTTCTTCCTTTTCAATTGCCTTTCTCCAGTCCTCAATGGAAATTTCATTATGGCATTTGATGCAATGGGCTT…	~300bp region of homology to several SIRT3 mRNAs in negative strand orientation (NM_001127057.1;XM_001028110.3;XM_005934206.2)
Target	14756_0_CCAG9200.b3_CAYC_CAYF_CCAG	AF286474_1 retinitis pigmentosa GTPase regulator	AGTGGCCTGCCTAACCTTTGATGAACAATATGCAGGTTATTACGGTACTACTATCGACTGTCCTGTTTCTCTTTGGTTCACTGGCAACTACCCGAAGTGG	+	126-225	GATAACAAGGGAAAGAAGGAGAAGAGAGATAAAAGGAGAGACAAGGGACACGCTGTTGTAGTTGGTGATGAAGAACGACCACTATCCCTACAAGAACTGGAAGCCATAACACAGAACGAGTGCTCAGTGGCCTGCCTAACCTTTGATGAACAATATGCAGGTTATTACGGTACTACTATCGACTGTCCTGTTTCTCTTTGGTTCACTGGCAACTACCCGAAGTGGCTAGAGACTCCGGACTTTGTAGGGGCACTTCAAAGGGCGGGGGCAGGGGCACTCAGCGAATTCACACCAAGGGTGTGTCAGTGTGGGATTGCGGACATCAGCCGTCAGTGTCCCAAGGAGGTGTTGTTGGCTGTCCTCACCATCATTAACGGGTGTCCACAACGAAGGAGGGTC…	Weak match ref|XP_003042123.1|
Target	1748_1_CAYC_CAYF_CCAG	Vitelline egg coat protein	ACTCTTTTGTCATACTCCAGACGGAATGCACACAGGTGAAGTCACCTCCTCCACTTTCAACCGTGGCTCCTGGACCGGTGCTCACATCTGCTCCAGTTTA	+	259-358	ACAGAACAGTAGCAGCCTCGTCTTCTCCACCGACACCACCATGATGCTGCTTCTCCATCTCACCTTTTTCGCCCTCCTCTCCTCCCAGGCCCTTGCCTACAGCCCCGACGACTTCATCCACTCACTGGGGGCGACCATGTGGGGGTACTGGGGCCTGACGGATGCTTGTGCCAATGGTTCATACGCTTATGGGTTTGAAATAAGTGTGGAGGAGGAACAAGGTGCCTTGGATGACGACACGAGCCTCAATGCCATCAAACTCTTTTGTCATACTCCAGACGGAATGCACACAGGTGAAGTCACCTCCTCCACTTTCAACCGTGGCTCCTGGACCGGTGCTCACATCTGCTCCAGTTTAATCACCGGCTACGATATCAAGGTTCAACCCGAAGAACGTGC…
Target	178_9_CAYC_CAYF_CCAG	Arginine kinase	GCTTGAGGAGGTTGCAGCCAAGTATAGTCTCCAGGTGCGTGGTACCCGTGGAGAACACACTGAAGCTGAAGGAGGTGTTTATGATATCTCCAATAAGCGG	-	41-140	CCATATTATGATTATTATTATTTATTATTATTATTATTATTACAACTCTGGGGTAAAGTTATACATATTTTTTTCAATTTTAACAGCTTGATATTCAGTAATATATTATAACCATTGGATTAAGCTTTACATATCCTTTTCAAGCTTGGTATTCAGTATTGACCCTAAAATTAAGCTTTACATATCTTTCAGCTTATAACCCTAAAATTAAGCTTTACATATTCTTTCAGCTTATAACCCTAAAATTAAGCTTTACATATTCTTTTCAGCTTATAACCCTAAAATTAAGCTTTACATGTTCTTTTCAAGCTTTACATATCCTTCTCAATCTTAAGCTCCAGGATTAAGCTTTACATATCCTTTTGAAGCTTTACACCCATCCCCCTTTTCAAGCTTTAC…	220bp region of homology to multiple arginine kinase mRNAs in negative strand orientation (AF167313.1;JN828651.1;JQ031765.1)
Target	1837_1_CAYC_CAYF_CCAG	Hsp90-alpha	GGTCAGTTTGGTGTTGGATTCTACTCGGCTTACTTGGTGGCTGATAAAGTTACGGTGATATCCCGCAATAATGATGATGAGCAGTATGTGTGGGAGTCCT	+	455-554	GCAGTCCCAGCCAGACACAGTACGAGGAGGTTGCGCTGTTTCAACATTCCATTCCCCTACCTTGTAATTTCGACACATTCCAATCATGCCTGAGGAAGTAATGGAAGAAGCCGAGACCTTCGCCTTCCAGGCGGAGATCGCCCAGTTGATGTCCCTCATTATCAACACTTTCTACAGCAACAAAGAGATCTTCCTGAGAGAGATCATCTCCAATTCTTCTGATGCTCTGGACAAGATCCGCTATGAATCCCTCACAGATCCTTCTAAACTTGATAATGGCAAGGATTTGTTTATCAAGTTGGTGCCCAACAAGAATGACCGCACACTCACCATTATTGACAGTGGTATTGGTATGACAAAGGCTGATCTGGTGAACAACCTTGGTACCATTGCCAAGTC…	ref|XP_037793741.1
Target	2202_1_CAYC_CAYF_CCAG	Epididymal secretory glutathione peroxidase	GAAGTTCCTCATCACCAAGAGCGGTAAACTTTACATGCGCTACGACCCTGAGACCAAACCTGAACAAATGCGCAATGACATCCTCTTTCTGCTGCAACAA	-	3-102	GGCCAGTATTCATAATTATTCTAAGTATGTATTTTTTATTCTAGCATATTCTTGTGTATTCCAAATTGATTCTTCTTTCGTCCAATTTAAGCTTCGTCCTGTTTATTTATTGTTAAGTAGCTCATTAAAATACTGTTGAGTGTGAGTTGCCGTGAGTGCCGAGCAGCGAGGTGACCTTATATATAGACCCCGGCGTGACCTGGTGTGGCCCGGATGTGGCTGAATGTGCTAAAGACCTCACCCGGGTTGACCCCTCCAGCGCCACCCTCCCATTTAGTTAGGGTTTGGGGCGACACCTTCACAATGCCACGCCGACGATCACCACATTCACCAAGCACTCACAACAAACATTACGGGATAGTACTGTACACTATTGGTAATTTGGAATGACTTTATTCC…	Weak homology to ref|XP_002427285.1|
Target	2758_1_CAYC_CAYF_CCAG	I-connectin	GGAAAATAATTCAGCAAGCTGTTGGAAAACTGGAACCTTTGTTGGCTCTGACTACTACTGATCACCGTAGTGAAGAATCCATAGCTCAGCTCTCGGACTT	+	353-452	GAATTACCAGCACCTTGGAAACAAGGTGATAAGGTTTCTTTCCGCACTCAAACTATTAAGCCAAAATTCATACCCTCGGAGCCACTTCAGGTAATTGACACAAAAACAGTTGATTCATGTACTGATTTTGAAGAAGAAAAGAGGAAGGAAGAAAAAGCTGTCTTAAAAGAGGACTTGAGAGATTCTGTTACTATTACAGAGAGGGTCCCAGAAGAGCAACCATCTCCTCTCAAGAAACCTCCAAGAGCAACAGCCGATTCTGCTGATCATTCACTCGTGATAATGGAACATGATTCACTGTCTGTTTCTGAAGTGTATCCGAAGGAGGAAAGCACAGATTTTGATGCAGAACGGAAAATAATTCAGCAAGCTGTTGGAAAACTGGAACCTTTGTTGGCT…	dbj|BAB64297.1|
Target	3280_1_CAYC_CAYF_CCAG	Vitellogenin_unique	AAGTCAGCATCTCTGAGGCTGATAGGTTGCACTTCAGCAAACGTCCACTATTCATGACAGGAGCTGAACTCGTTACTCCATATCGTCTGAAGACAAAGTT	+	1101-1200	AAGTCACCAAAACTCTCCTCAGGAACGTCTCATTGAAATCAAGACAACAGCAAAGGTTCCCAGTCTGAATCATCCTCTTATGACACAACTTAAAGTGACCAACCAGGATTACTCTTACAAGATCAAGTTGGACACAGTTGTCAACCAACCGGCAACCATGTTTAACTGGCAGTTGGAGGCTTTACCTGAAGGTGGAATTAAGACCTTTGACACAGCTGTTGACGTGAAGGCCATTCGTGACCTTTTACAGGAAGTGATGAGAATGATGGGATCAGGAAACACCATTAATATGAACTACAGTAGCCAAAGATCTACCTTCCGTTCTCGTTACCATTCACCAGAGACAAGTACCCACACTGTGTTGATCCAATCTCCATCACGTACTATGGAAGGTGAAGC…	gb|AKI23633.1
Target	3280_2_CAYC_CAYF_CCAG	Vitellogenin_common	AGTTGTGAACCAACGACCTTTCTTGGAACAGTGCTACACTGGACCGTCTGCATGTGAAGGTGCCAAGGCTTACCATGAAGCGTGTGCTACTCAACATATC	-	509-608	AAGTCACCAAAACTCTCCTCAGGAACGTCTCATTGAAATCAAGACAACAGCAAAGGTTCCCAGTCTGAATCATCCTCTTATGACACAACTTAAAGTGACCAACCAGGATTACTCTTACAAGATCAAGTTGGACACAGTTGTCAACCAACCGGCAACCATGTTTAACTGGCAGTTGGAGGCTTTACCTGAAGGTGGAATTAAGACCTTTGACACAGCTGTTGACGTGAAGGCCATTCGTGACCTTTTACAGGAAGTGATGAGAATGATGGGATCAGGAAACACCATTAATATGAACTACAGTAGCCAAAGATCTACCTTCCGTTCTCGTTACCATTCACCAGAGACAAGTACCCACACTGTGTTGATCCAATCTCCATCACGTACTATGGAAGGTGAAGC…	gb|AKI23633.1
Target	3397_1_CAYC_CAYF_CCAG	AMPK-2	GAACGTAAAGTGTTGTCAGAAGATGAGGCCAGAAGAGTCTTCAGACACGTAGCTTGTGCCACATACTACTGCCATAAACACAAGATCTGCCATCGAGATT	+	564-663	AATAATTACCTGCTGGACACATGTATCCCCCGGGTATATAATGATGTGGGCGGGCGGTGGGTGTGTGTGGGCGTGGGGATCAGCCATTATGGATCTCAGACACGCCCGTGAGGAGGAGAAGCAGCGTGCGTTACCACACCTGCACTAGTGACACATTTCTTTAAATTAACGCCGACAAGAAAACCGGCGCGATGGTGGTCTCAGAGGGCGCCATCAACAACATCATGGGGGGGATGGAGAACACAGCAGGCGTCAGACTCCACTCCCACAGACACAAACTCAAACAGAGGTTCGACATCGTGCGAAAGCTGGGCCAAGGGACATATGGCAAGGTCCAACTGGCAGTCAACAAGGAAACTGGCCAAGAGGTTGCCATCAAGACCATAAAGAAGGCCAAAA…	positive strand alignments
Target	3924_1_CAYC_CAYF_CCAG	Hsp83	AGAAGAAAAAGATGACACTGAAGACACTAGATCCGGACCGTAAACTGGAGGAGACATTGAAGGGGAAACTCAAGGCCTCACCAAAGATCAACAGAGATGA	-	555-654	CCTCTTGATTTTTCTTTGCTTGTTGTTTTTTTATCATCATCATCATCGTCTTCGTCTTTTCTTCTTCTGCCTTGCCTGTTTATGGGTTTTATTTCATCTGTCTTCTTCACATCTTTGCTATTTTCATCCTTCTCTTCATCCTTTGTTATTTGTCCTTCCTTTACGTCATCCCCACTTTCCTTATTATTCTTTGACTCCTCCTCTTTCTCCTCCTTAGTGTCGATTTTCATTTCCCCTTTATTCTCCTTCTCTTCTTCGTCACGTATCGCTTCTCTCTTCATTCTCTTCCCTGATTCTCTCTCTTCTTCAACCTCCATCCGTTTCGCTCCCCGTTCCACCTCAACCTCAATTCGATTATATTCTCTCTTGGCTCTCTTCCTTCTCCTTTTTCTTCTGGGG…	negative strand alignments
Target	CCAG48604	Fatty acid-binding protein	CTTTACCAACACCATCACTCTGGGTCAGGACTCCAAGGCTTCTCTTCCTGGAGGCATTGAATATACTCTGAACATGAACTTGTCTGGGTCAACCCTCAGT	+	204-303	CTATAGCCTAAACCAGCCAACAACATCATCATGTCTGTCTCCGGAAGCTACACCCTCGCCACCAACGACAAGTATTCGGAATGGCTTTCCCAAGTTGGTTTGCCAGCCGATAGCATTGTTAAGTTGGTGGCCGCCAAGCCTATCCTAGAAATCAGTCACAATGGCAACACCGCTACGGTGAAGACAATAGCTGGGGACAAGAACTTTACCAACACCATCACTCTGGGTCAGGACTCCAAGGCTTCTCTTCCTGGAGGCATTGAATATACTCTGAACATGAACTTGTCTGGGTCAACCCTCAGTGGAACATACAACTTTGGTGGCAAGACTGGCACTGCATCGGTGGAATTCACTGCATCCGGTGCCAATCAGACCATGACTTTGGGTGGAGTCACAGCC…	positive strand alignments
Target	comp50435_c1_seq2	Cuticle protein AM1159	GCGCTGAAGGTCAGGTCAACATTCAGGGAGAATACAGCTACAGGCTTGCTGACGGCACAGAAGTTCTGGTCCGCTACATCGCCAACGAGAACGGTTACCA	-	189-288	TTTTTTTTGATTTTGATAAAGAGATGTTTTATTGAAATTTACGAATAGACATGTATTAAATACAAATAATGCATAACAATAACGGAGACGGTGTCGTGAATTAAAGCCAGTTTAAGTTCTACTCGAAGGTGATGCCCTCAGCCCGCTGCTGTTCTGCGATGCGGATCTGTTCGATGGCGTGGGCGGGGAGTGGGTGGGGTGTGGGCAGCCACTCAGACTCAGGCTGGTAACCGTTCTCGTTGGCGATGTAGCGGACCAGAACTTCTGTGCCGTCAGCAAGCCTGTAGCTGTATTCTCCCTGAATGTTGACCTGACCTTCAGCGCCTGGGGTACCCACTGCTGACACACGGGTACCGTCGGAAGTTTCGAAGGCAAAGTTGAAGTTTCCGTCACCAGAGT…	300bp region of homology to 1 cuticle protein AMP13.4 in negative strand orientation (DQ288147.1)
Target	comp55113_c2_seq1	Cytochrome P450 2L1	TCCTGATCTCATGCCTTGGCTTCTTCAAATAATGCCCAAGACATTGTCAGACCGAATCTTCAAGATGGACCACGCAATGGGAATGATAGACAAGTTCTTT	+	739-838	AGAAACAGAGCCCACTTCTTATGGGCATCTGGCGTTGTAGGGTTCTGTGTTATTGTTGCTGTTGTGTTGTGTTACTGAGGGATTTGTGTATAACTGAGAAGAGGAGTACGTGAAGATGTGGGTAGAGGCATTGCTACTGGTGCTGCTGTTTCTGCTACTGAAAAAGGTGCTGCGTAAACCAGATGGACTTCCCCCTGGTAGGTGGGGACTTCCTCTGGTGGGATATATTCCTCTGTTCGACAAGCGACCTATGCTGGAACAACTGCAAGATCTCCGAAAGCAGTATGGTGATGTGTACACATGGAGGGTAGGAACACAGTTGATGATCTTCATACACGACTACAAGCTAATTAAGGAAGCTTACAGCAAGTCAGAAGTTACTGAAAGGCCCAAATGGTG…	positive strand alignments
Target	comp55834_c0_seq3	Cuticle protein AMP1A	ACCAACAGATGCTCGAGATAAAGCATCTTTGTCAGAATAATATCTACAATATTCCAAACGACCAGGTAAATTAAATTATATCTAGATCACTCTGCTACCT	+	15-114	TGGTATTCATCACTACCAACAGATGCTCGAGATAAAGCATCTTTGTCAGAATAATATCTACAATATTCCAAACGACCAGGTAAATTAAATTATATCTAGATCACTCTGCTACCTACGAGGTCACACTTTCACGACGTCACACACTTTATGTTATTTAGTAATTATTATAATCCAATTATTTTACCCTAATCCTCCTCTGGTGCCTTCTTCAGGTCATCCTCGCCTGTCTAGCCACCGTGGCCATTGCCGCCCCCCAGCAAGCGAACCCTCGCCCCATCGAAGTGATCAGAGACGAGCGTGTAGACCAGGGAGATGGTAACTTCCAATATGAGTTCGAGACAGAGAATGGTATCTACACCAACGCAGTAGGTGCCCCTGGATCCCTGGGACAGAGCAACA…	positive strand alignments
Target	comp55959_c0_seq1	V-type proton ATPase subunit G	GGCCCGAGTTACACGTCAACGCCAAGAAAGAATAAAAATAAAGGCCTGTAATGCCAAACAAAGCCTGGAGATGGAGCAAGTGTTGTGTGAACCTTGATTA	+	367-466	AAGGGAAGGTTGAGTCGGTGTGAAGATCGAGCGTCCCAGTCGTCGTGATGGCCAGCCAGAGTCAAGGAGTTCAACAGCTTTTGGCAGCCGAGAAAAAGGCCGCCGAGAAGGTTGCAGAGGCCAGGAAGCGAAAGGCAAGACGACTGAAGCAGGCCAAGGATGAGGCTCAGGCGGACATTGAGAAGTTCCGACAGGAGAGGGAGCGGCAGTTTAAAGATTATGAGGCCAAGTACCTCGGATCTCAGGATGACGTCGCCCTGAAGATCAAACAAGATACTCACATCAAGATCACAGCAATGAACAAACAGGTGGCCACCAGGAAAGATGAGGTAATTGAGCGCATCCTGCAGTTGGTGAGTGACATCAGGCCCGAGTTACACGTCAACGCCAAGAAAGAAT…	positive strand alignments
Target	comp56496_c0_seq4	Endocuticle structural glycoprotein SgAbd-3	AATGGAATGTATGGGTCCTATAATATAACACTGATCTTTAGGCAACTCACTTCCCTCAACACACATACCTATATACCCCATCCTTTTGCTCCTCCATCTC	+	88-187	ATTTGTCATTTATTAGCTCAACTTACGACTGTGTCCAGTTGGCGTTTGATGTTATACAAGTGAGACCTTTGTCACTATCAAAATTATAATGGAATGTATGGGTCCTATAATATAACACTGATCTTTAGGCAACTCACTTCCCTCAACACACATACCTATATACCCCATCCTTTTGCTCCTCCATCTCCCCCTCCATTCCCTCCTCCTGTTACACCTCTCTAAGTCCTCAAACACTCTCCCAACACCTGATCTTCCCCTCCTCCCTTTGCTATTCCTCCACCTCTCCCCTCCATCTCCCCCCAACACGTCCACTTCCACCCTCCCACTCCCGGACATGCAAAGAGAGGCTTACTGGAGGGAGGGGTGGGTATATAAAGTGCAGGAGGCCTGCTGGAAGTC…	sp|Q7M4E9|
Target	comp56747_c2_seq2	HSP70	GAGATGTCCACTGGGCTGCTTCACCGAGTGGAATTGGCCTTACAGCATTGCCTGACTGACAGTGGTCTCAAACTGGACGACATTTCCTCAGTTGAGATTG	+	1086-1185	GGGCAGTGCTCAGTTCGGGGTCTTAAGTCGAGTGCGCGATAGTGGTCCCCAGCAGGCCATACCAGCGTGTGCACGGTAGCCTTTCCAGCCACACTCCCTGGGGCGTCTGGCGTGTGTGTGTCGAGGCCTGGATAATATAAACAGATCAATAATAAAATATAAAGATGTCCGTCATTGGTATAGACTTCGGGAATGATGGCTGTTACATCGCAGTGGCAAGGCAGGGCGGCATCGAAACTATTGCCAATGATTATAGTCTCCGCTCCACACCAGCATGTGTCGCATTTGGCGAGAAAAACCGGATACTTGGTGTGGCAGCCAAAAATCAGATGACCACCAACATGAAAAACACGGTCCACAGCTTTAAGAGATTCATAGGGAGACAGTATAGGGACTCCA…	gb|AKB96224.1
Target	comp57952_c3_seq2	Troponin I	AATAAAATAGATAACTATAAAATGTTGATACTGAGGGAACAAGAAGATAGAATAGGAGGAAGATTTTGGTACCTTTGTCTGTGCTGGGTAAATGTTTGAC	+	845-944	CTAAAGCGGAAGGTGAGACACAAACCAACGCACAGTCAGTCCCTTGGGCGAATTGACTGCACACGCCACACAGCGTCTCTCACGCCCATATCTCCTTAGCAGTTCAGAAGAAGAAGACAGCAGCAACATGGCGGACGAGAAGGCAAAAGCAGCCGAGGAAGCAAAGAGGAAGCAGGTTGAGATCGACAAGAGGAAGGCCGATGTCCGTAAACGCCTGGAAGAAGCGAGTCAGAAGAAGCAAAAGAAAGGCTTCATGACTCCAGAACGTAAGAAGAAGCTCAGGCTCCTACTGCGTAAGAAGGCCGCTGAAGAACTGAAGAAAGAACAGGAGAGGAAGGCCGGTGAGAGACGCAAGATTATTGACCAACGCTGTGGTCAACCGAAAAATCTTGATGGTGC…	positive strand alignments
Target	comp59049_c0_seq1	Cuticle protein AM/CP1114	ACGAACTGGGCAGGAGGCTGAACTAATAAAAAGCTTCCATAAACCTTACATCACACCAATGTACTAGTTTTCCACAAGCATCATCTGGCTGATCATTGTC	-	394-493	AGAGAGAGAGAGAGAGAGAATGTTAGTGTCGGTGCAAGATCCAACAGTGACCGGCACTCTTAGCTTGCAGACTCTTGCACCCTCTCTGCCTGTTGGAATCTGAAGGGCGGTGTCTCACGATCATTATTTCCCTTCACATCCACCCGGCTGATATTTTGTGAGTCCGCTTACGGTTATTGGTTTGGGGAACACGAAATCTTAACTTTTATTCGTTATTGTGTTTTATTTTATCTATTTTGGGGGGAGAACTTCCATTTTCAGCTCATGAAATTGGAAGTAAGAGCTTGAAAATGTTGTTAGGAATGTATAGGAGAAATAAAGACAATGATCAGCCAGATGATGCTTGTGGAAAACTAGTACATTGGTGTGATGTAAGGTTTATGGAAGCTTTTTATTAGT…	~300bp region of homology to 2 cuticle protein AMP mRNAs in negative strand orientation (DQ310582.1 & DQ288147.1)
Target	comp60397_c0_seq1	E3 ubiquitin-protein ligase UBR4	GAACCGAGTACAATACCAAGTGTGTTATGTTTATACACCATGCAGGTCTCGAGGTGGTGTCATGCACGCTTGCTTGGCCCACATCTCGACAACGACCACA	+	550-649	CATGGCTGCTACAAGTGGAGGAGTAGAGTGGAGCCAACTGGTTAAACCTATATTAGCGGCTTCCTATGGATCCGTCAATAAACAAGACCTCCCAGAACTGGTCAAAGCCATCCTAAAGAGTAAAGAGGAAATACTTCATCATGAGGAGCAATATGAAGCATTCTATGTGTCCCTGTGTGTGTTGGCTGCTGACTACCTTGCCAGCAATTCACATCAGTTGAGTGTTGGGGGTGTGAGCCAAGCTGTCAGTGCTGCAAAGGTCCTGCTTCAATTCCTGGCAAGTCATGTTGGCAAACCAGCGACAACAGTGCCAACACCGGCCTTGCCATCTGCCACCGCCACTACCAACACCACACCCGGCACTCCACCCACCACCACCAATGGTACACCCACCCAACC…	positive strand alignments
Target	comp62130_c0_seq4	V-type proton ATPase subunit D 1	GAGACACCATTTGAGGAGGAGCCTGTATTCAGCAATTCGGTACCCATCTGTAGACTGTTGTGGTCGAAGACTGCATGAAGAAACTAGAGATTCCTTACAC	+	1231-1330	TCTCCATCTACACATAACCAGAAATCCATCTACACATTGCTAACACTGTACATGAAAGCTGTGTAGTGTTTAGTGTGGGTTTCTTGAACTAGTACAGTGCATAGGTAGAAAATTACACTTATTCTCACAATGAAGATATATTTATACACAAACTTGGGATTCTGCAGGCACCAACCTTCCTGTATTTGAGTGCTTTGAGGATGGTGCAGATACATACGAATTGACTGGCCTGTCCCGTGGTGGTCAGCAGATGGCCAAACTGAAGATCAACTATAAGCGTGCCATTGAGTTGCTGGTGGAGTTGGCCTCACTCCAGGCCTCCTTTGTTACCCTTGACAATGTGGTCAAAATCACCAACCGCCGTGTCAATGCCATCGAGCATGTAATCATCCCGAGGTA…	positive strand alignments
Target	comp63155_c0_seq11	V-type proton ATPase 116 kDa subunit a isoform 1	TGCTTCTCTGCTTGGATGGTATTGCGTGAGAAAGCCCTCATTGCTTCCAAAATGTCTGGTGAGATCTGGAACATCTTCTTTGGAGGACGGTACATCTTGT	+	1742-1841	ATTGGCTAAACTACAGCATGTATTGTGTTTCCATAGTAAGGGTAATCTTGGGATGGGTAAACTATAGACTTGTGATCAACAGGTGCCCAAACCAAACGTATAGGCAGCAGGAGGTGAAAAGAAGTTAAAAATAGCACGAGAGAAGTGAGAGCAGCAAGGAGTCAGCCAGCATGGGGTCCATCTTCCGTAGCGAAGAGATGGCCCTCTGCCAACTCTTCCTTTCCAGTGAAGCGGCCTACAACTGTGTGTCTGAGCTGGGCGAGATTGGTCTGGTGCAGTTTAGGGATTTGAACCCGGATGTTAACGCCTTCCAACGTAAGTTCGTCCACGAGGTGCGTCGGTGTGATGAGATGGAGCGTGTGTTGAGGTACCTGGAACGGGAGGTGGAGAAGGACAAGT…	positive strand alignments
Target	comp64021_c3_seq1	Cytochrome b-c1 complex subunit 8	TCTAGGTGACGAAACGACGAGAACTGGTGGTGGATATAAGTAAGCCATTATATAAATTATATTCCAAGGAGACAGACATGGGGAAAGGATTCGGAGAGCT	+	2-101	GTCTAGGTGACGAAACGACGAGAACTGGTGGTGGATATAAGTAAGCCATTATATAAATTATATTCCAAGGAGACAGACATGGGGAAAGGATTCGGAGAGCTTGCATATGTGCGGGGAATCGTCAAGTATTCCCTGTCTCCCTTTGAGCAGAAAGCTTTTGCTGGTGCCATTTCCAATGGAATTCCAAACCTGTTCAGGAGATTTAAGTCACAAGTGTTTCGTATTGCACCACCCTTCATTATTGCCTACATGGTCTACAGTGGAGTGGAAGCCAGACATGAACAGCTCATGAGAAAAAACCCTGCTGACTATGAAAATGATGAGT	positive strand alignments
Target	comp65435_c0_seq8	Ral guanine nucleotide dissociation stimulator-like 1	CCTTGGTACTTTCCTCACGGACCTCACCATGATTGACACAGCCATACCTGACACGGTCGCTGATGGACTCATTAACTTTGACAAGAAACGTAAGGAGTTC	+	1650-1749	CTGGAAGTGAAGGAGTGAGGGAGTGGTGAATCTTTCTCCCTTCCTCCTCCCTTTTCTTCCTCCTACTCCTACTCCTCCTTTTCATCCTCCTCTACCTCCTTTCCTACCAACCAGTGAGATTGAACGGAGGGAAAGAGAGATAAGCAGTATACAGAGAGGAGAATAAAAGCTGCATTATTGAGGTGCGTGTGATAACAACAACAACAACAACTAAAGCAAAGATACAGAAATTAACAGCACTGCAAAAGAGAGAAAAGATTAACTGTACTATTGAGACGTGTATATTATGTGTGTGTAAGAATAACGGTGACGACGACAAAGATACATAAACTACAGCACTACAAGAGGAGCCATGGCAGGTCGAGGCTCCCAAGGGTACAGGAAGATACAGAGGACGAG…	positive strand alignments
Target	comp65993_c0_seq6	Ubiquitin-conjugating enzyme E2 J1	AGCCGATGGACTGGACGACATACCACGACCTTGATGATATTGAGGGCTTCATCGGTTGGCTCAATGTCACGGGGGCGAGTTTTGTGCAAGTCGCTACAGC	+	781-880	TAGTGACCTGCACATACAAAAAAAATCATCCTCTCCTTTACCTTGTGACTCAGTCGGTGTGTTTTAATTCCCTTCTGGTACATTTGTTTTTATTTTCATCCCACAACAACATTTGAGCTAAACTCTTATACATTTCACCGTCATAGAGTTCCCGCGGGATGAGTGAAACAAACAAACAAACTCACTTCTTCGGCAACCTATCTATTATTAGCGCACAAGGTCAAATGATATATGCATGCACTCAGTCAGTCTCATAGTCAGTATACAAGCAGCCGTCTACGCAGGTACACAACACAACGCAACACACACTCGGCCCCAAGACGTCGCACCTTTCACACGTGTTCACAAGCAGCTGTCTACACCACACAACAACAACACACACTCGACCCCAAGACGTCG…	positive strand alignments

## Sheet: Raw data
Data_file	Sample_ID	Sampling_Date	Sampling_Intertidal_Zone_Height	Sample_Sex_MaleFemale	Type	Probe_ID	Raw_Expression
20160831_Still1_0802F01L_06.RCC	0802F01L	2015-08-02	Low	F	Positive	POS_A	27635
20160831_Still1_0802F01L_06.RCC	0802F01L	2015-08-02	Low	F	Positive	POS_B	7037
20160831_Still1_0802F01L_06.RCC	0802F01L	2015-08-02	Low	F	Positive	POS_C	1789
20160831_Still1_0802F01L_06.RCC	0802F01L	2015-08-02	Low	F	Positive	POS_D	505
20160831_Still1_0802F01L_06.RCC	0802F01L	2015-08-02	Low	F	Positive	POS_E	109
20160831_Still1_0802F01L_06.RCC	0802F01L	2015-08-02	Low	F	Positive	POS_F	101
20160831_Still1_0802F01L_06.RCC	0802F01L	2015-08-02	Low	F	Negative	NEG_A	26
20160831_Still1_0802F01L_06.RCC	0802F01L	2015-08-02	Low	F	Negative	NEG_B	15
20160831_Still1_0802F01L_06.RCC	0802F01L	2015-08-02	Low	F	Negative	NEG_C	2
20160831_Still1_0802F01L_06.RCC	0802F01L	2015-08-02	Low	F	Negative	NEG_D	3
20160831_Still1_0802F01L_06.RCC	0802F01L	2015-08-02	Low	F	Negative	NEG_E	22
20160831_Still1_0802F01L_06.RCC	0802F01L	2015-08-02	Low	F	Negative	NEG_F	69
20160831_Still1_0802F01L_06.RCC	0802F01L	2015-08-02	Low	F	Negative	NEG_G	6
20160831_Still1_0802F01L_06.RCC	0802F01L	2015-08-02	Low	F	Negative	NEG_H	6
20160831_Still1_0802F01L_06.RCC	0802F01L	2015-08-02	Low	F	Housekeeping	15_8	105678
20160831_Still1_0802F01L_06.RCC	0802F01L	2015-08-02	Low	F	Housekeeping	187_1_CAYC_CAYF_CCAG	10674
20160831_Still1_0802F01L_06.RCC	0802F01L	2015-08-02	Low	F	Housekeeping	comp61175_c0_seq94	635
20160831_Still1_0802F01L_06.RCC	0802F01L	2015-08-02	Low	F	Housekeeping	comp61968_c0_seq6	375
20160831_Still1_0802F01L_06.RCC	0802F01L	2015-08-02	Low	F	Housekeeping	comp62062_c4_seq7	609
20160831_Still1_0802F01L_06.RCC	0802F01L	2015-08-02	Low	F	Housekeeping	comp62406_c1_seq15	692
20160831_Still1_0802F01L_06.RCC	0802F01L	2015-08-02	Low	F	Housekeeping	comp63344_c0_seq12	983
20160831_Still1_0802F01L_06.RCC	0802F01L	2015-08-02	Low	F	Housekeeping	comp64151_c1_seq55	1001
20160831_Still1_0802F01L_06.RCC	0802F01L	2015-08-02	Low	F	Target	0_0_CCAG28737.b1_CAYC_CAYF_CCAG	1671
20160831_Still1_0802F01L_06.RCC	0802F01L	2015-08-02	Low	F	Target	1252_1_CAYC_CAYF_CCAG	2391
20160831_Still1_0802F01L_06.RCC	0802F01L	2015-08-02	Low	F	Target	13341_0_CCAG36642.b1_CAYC_CAYF_CCAG	455
20160831_Still1_0802F01L_06.RCC	0802F01L	2015-08-02	Low	F	Target	14_5_CAYC_CAYF_CCAG	1223
20160831_Still1_0802F01L_06.RCC	0802F01L	2015-08-02	Low	F	Target	1432_1_CAYC_CAYF_CCAG	501
20160831_Still1_0802F01L_06.RCC	0802F01L	2015-08-02	Low	F	Target	14392_1_CAYC_CAYF_CCAG	44256
20160831_Still1_0802F01L_06.RCC	0802F01L	2015-08-02	Low	F	Target	14490_0_CCAG5543.g1_CAYC_CAYF_CCAG	59
20160831_Still1_0802F01L_06.RCC	0802F01L	2015-08-02	Low	F	Target	14756_0_CCAG9200.b3_CAYC_CAYF_CCAG	2
20160831_Still1_0802F01L_06.RCC	0802F01L	2015-08-02	Low	F	Target	1748_1_CAYC_CAYF_CCAG	8534
20160831_Still1_0802F01L_06.RCC	0802F01L	2015-08-02	Low	F	Target	178_9_CAYC_CAYF_CCAG	17614
20160831_Still1_0802F01L_06.RCC	0802F01L	2015-08-02	Low	F	Target	1837_1_CAYC_CAYF_CCAG	7105
20160831_Still1_0802F01L_06.RCC	0802F01L	2015-08-02	Low	F	Target	2202_1_CAYC_CAYF_CCAG	6835
20160831_Still1_0802F01L_06.RCC	0802F01L	2015-08-02	Low	F	Target	2758_1_CAYC_CAYF_CCAG	8416
20160831_Still1_0802F01L_06.RCC	0802F01L	2015-08-02	Low	F	Target	3280_1_CAYC_CAYF_CCAG	23022
20160831_Still1_0802F01L_06.RCC	0802F01L	2015-08-02	Low	F	Target	3280_2_CAYC_CAYF_CCAG	23434
20160831_Still1_0802F01L_06.RCC	0802F01L	2015-08-02	Low	F	Target	3397_1_CAYC_CAYF_CCAG	1333
20160831_Still1_0802F01L_06.RCC	0802F01L	2015-08-02	Low	F	Target	3924_1_CAYC_CAYF_CCAG	64
20160831_Still1_0802F01L_06.RCC	0802F01L	2015-08-02	Low	F	Target	CCAG48604	167374
20160831_Still1_0802F01L_06.RCC	0802F01L	2015-08-02	Low	F	Target	comp50435_c1_seq2	181
20160831_Still1_0802F01L_06.RCC	0802F01L	2015-08-02	Low	F	Target	comp55113_c2_seq1	6037
20160831_Still1_0802F01L_06.RCC	0802F01L	2015-08-02	Low	F	Target	comp55834_c0_seq3	52
20160831_Still1_0802F01L_06.RCC	0802F01L	2015-08-02	Low	F	Target	comp55959_c0_seq1	3834
20160831_Still1_0802F01L_06.RCC	0802F01L	2015-08-02	Low	F	Target	comp56496_c0_seq4	55
20160831_Still1_0802F01L_06.RCC	0802F01L	2015-08-02	Low	F	Target	comp56747_c2_seq2	1528
20160831_Still1_0802F01L_06.RCC	0802F01L	2015-08-02	Low	F	Target	comp57952_c3_seq2	31
20160831_Still1_0802F01L_06.RCC	0802F01L	2015-08-02	Low	F	Target	comp59049_c0_seq1	12565
20160831_Still1_0802F01L_06.RCC	0802F01L	2015-08-02	Low	F	Target	comp60397_c0_seq1	80
20160831_Still1_0802F01L_06.RCC	0802F01L	2015-08-02	Low	F	Target	comp62130_c0_seq4	2194
20160831_Still1_0802F01L_06.RCC	0802F01L	2015-08-02	Low	F	Target	comp63155_c0_seq11	4423
20160831_Still1_0802F01L_06.RCC	0802F01L	2015-08-02	Low	F	Target	comp64021_c3_seq1	2620
20160831_Still1_0802F01L_06.RCC	0802F01L	2015-08-02	Low	F	Target	comp65435_c0_seq8	375
20160831_Still1_0802F01L_06.RCC	0802F01L	2015-08-02	Low	F	Target	comp65993_c0_seq6	772
20160831_Still1_0802F02L_07.RCC	0802F02L	2015-08-02	Low	F	Positive	POS_A	13215
20160831_Still1_0802F02L_07.RCC	0802F02L	2015-08-02	Low	F	Positive	POS_B	3740
20160831_Still1_0802F02L_07.RCC	0802F02L	2015-08-02	Low	F	Positive	POS_C	982
20160831_Still1_0802F02L_07.RCC	0802F02L	2015-08-02	Low	F	Positive	POS_D	250
20160831_Still1_0802F02L_07.RCC	0802F02L	2015-08-02	Low	F	Positive	POS_E	64
20160831_Still1_0802F02L_07.RCC	0802F02L	2015-08-02	Low	F	Positive	POS_F	42
20160831_Still1_0802F02L_07.RCC	0802F02L	2015-08-02	Low	F	Negative	NEG_A	5
20160831_Still1_0802F02L_07.RCC	0802F02L	2015-08-02	Low	F	Negative	NEG_B	13
20160831_Still1_0802F02L_07.RCC	0802F02L	2015-08-02	Low	F	Negative	NEG_C	3
20160831_Still1_0802F02L_07.RCC	0802F02L	2015-08-02	Low	F	Negative	NEG_D	6
20160831_Still1_0802F02L_07.RCC	0802F02L	2015-08-02	Low	F	Negative	NEG_E	7
20160831_Still1_0802F02L_07.RCC	0802F02L	2015-08-02	Low	F	Negative	NEG_F	17
20160831_Still1_0802F02L_07.RCC	0802F02L	2015-08-02	Low	F	Negative	NEG_G	5
20160831_Still1_0802F02L_07.RCC	0802F02L	2015-08-02	Low	F	Negative	NEG_H	2
20160831_Still1_0802F02L_07.RCC	0802F02L	2015-08-02	Low	F	Housekeeping	15_8	29080
20160831_Still1_0802F02L_07.RCC	0802F02L	2015-08-02	Low	F	Housekeeping	187_1_CAYC_CAYF_CCAG	26109
20160831_Still1_0802F02L_07.RCC	0802F02L	2015-08-02	Low	F	Housekeeping	comp61175_c0_seq94	250
20160831_Still1_0802F02L_07.RCC	0802F02L	2015-08-02	Low	F	Housekeeping	comp61968_c0_seq6	174
20160831_Still1_0802F02L_07.RCC	0802F02L	2015-08-02	Low	F	Housekeeping	comp62062_c4_seq7	267
20160831_Still1_0802F02L_07.RCC	0802F02L	2015-08-02	Low	F	Housekeeping	comp62406_c1_seq15	373
20160831_Still1_0802F02L_07.RCC	0802F02L	2015-08-02	Low	F	Housekeeping	comp63344_c0_seq12	425
20160831_Still1_0802F02L_07.RCC	0802F02L	2015-08-02	Low	F	Housekeeping	comp64151_c1_seq55	310
20160831_Still1_0802F02L_07.RCC	0802F02L	2015-08-02	Low	F	Target	0_0_CCAG28737.b1_CAYC_CAYF_CCAG	466
20160831_Still1_0802F02L_07.RCC	0802F02L	2015-08-02	Low	F	Target	1252_1_CAYC_CAYF_CCAG	1165
20160831_Still1_0802F02L_07.RCC	0802F02L	2015-08-02	Low	F	Target	13341_0_CCAG36642.b1_CAYC_CAYF_CCAG	178
20160831_Still1_0802F02L_07.RCC	0802F02L	2015-08-02	Low	F	Target	14_5_CAYC_CAYF_CCAG	1297
20160831_Still1_0802F02L_07.RCC	0802F02L	2015-08-02	Low	F	Target	1432_1_CAYC_CAYF_CCAG	361
20160831_Still1_0802F02L_07.RCC	0802F02L	2015-08-02	Low	F	Target	14392_1_CAYC_CAYF_CCAG	20495
20160831_Still1_0802F02L_07.RCC	0802F02L	2015-08-02	Low	F	Target	14490_0_CCAG5543.g1_CAYC_CAYF_CCAG	20
20160831_Still1_0802F02L_07.RCC	0802F02L	2015-08-02	Low	F	Target	14756_0_CCAG9200.b3_CAYC_CAYF_CCAG	2
20160831_Still1_0802F02L_07.RCC	0802F02L	2015-08-02	Low	F	Target	1748_1_CAYC_CAYF_CCAG	1854
20160831_Still1_0802F02L_07.RCC	0802F02L	2015-08-02	Low	F	Target	178_9_CAYC_CAYF_CCAG	5885
20160831_Still1_0802F02L_07.RCC	0802F02L	2015-08-02	Low	F	Target	1837_1_CAYC_CAYF_CCAG	2576
20160831_Still1_0802F02L_07.RCC	0802F02L	2015-08-02	Low	F	Target	2202_1_CAYC_CAYF_CCAG	825
20160831_Still1_0802F02L_07.RCC	0802F02L	2015-08-02	Low	F	Target	2758_1_CAYC_CAYF_CCAG	2488
20160831_Still1_0802F02L_07.RCC	0802F02L	2015-08-02	Low	F	Target	3280_1_CAYC_CAYF_CCAG	21
20160831_Still1_0802F02L_07.RCC	0802F02L	2015-08-02	Low	F	Target	3280_2_CAYC_CAYF_CCAG	34
20160831_Still1_0802F02L_07.RCC	0802F02L	2015-08-02	Low	F	Target	3397_1_CAYC_CAYF_CCAG	475
20160831_Still1_0802F02L_07.RCC	0802F02L	2015-08-02	Low	F	Target	3924_1_CAYC_CAYF_CCAG	33
20160831_Still1_0802F02L_07.RCC	0802F02L	2015-08-02	Low	F	Target	CCAG48604	33713
20160831_Still1_0802F02L_07.RCC	0802F02L	2015-08-02	Low	F	Target	comp50435_c1_seq2	8019
20160831_Still1_0802F02L_07.RCC	0802F02L	2015-08-02	Low	F	Target	comp55113_c2_seq1	770
20160831_Still1_0802F02L_07.RCC	0802F02L	2015-08-02	Low	F	Target	comp55834_c0_seq3	134
20160831_Still1_0802F02L_07.RCC	0802F02L	2015-08-02	Low	F	Target	comp55959_c0_seq1	3617
20160831_Still1_0802F02L_07.RCC	0802F02L	2015-08-02	Low	F	Target	comp56496_c0_seq4	12
20160831_Still1_0802F02L_07.RCC	0802F02L	2015-08-02	Low	F	Target	comp56747_c2_seq2	673
20160831_Still1_0802F02L_07.RCC	0802F02L	2015-08-02	Low	F	Target	comp57952_c3_seq2	20
20160831_Still1_0802F02L_07.RCC	0802F02L	2015-08-02	Low	F	Target	comp59049_c0_seq1	15403
20160831_Still1_0802F02L_07.RCC	0802F02L	2015-08-02	Low	F	Target	comp60397_c0_seq1	71
20160831_Still1_0802F02L_07.RCC	0802F02L	2015-08-02	Low	F	Target	comp62130_c0_seq4	1817
20160831_Still1_0802F02L_07.RCC	0802F02L	2015-08-02	Low	F	Target	comp63155_c0_seq11	4280
20160831_Still1_0802F02L_07.RCC	0802F02L	2015-08-02	Low	F	Target	comp64021_c3_seq1	1731
20160831_Still1_0802F02L_07.RCC	0802F02L	2015-08-02	Low	F	Target	comp65435_c0_seq8	192
20160831_Still1_0802F02L_07.RCC	0802F02L	2015-08-02	Low	F	Target	comp65993_c0_seq6	224
20160831_Still1_0802F03L_08.RCC	0802F03L	2015-08-02	Low	F	Positive	POS_A	26201
20160831_Still1_0802F03L_08.RCC	0802F03L	2015-08-02	Low	F	Positive	POS_B	6323
20160831_Still1_0802F03L_08.RCC	0802F03L	2015-08-02	Low	F	Positive	POS_C	1550
20160831_Still1_0802F03L_08.RCC	0802F03L	2015-08-02	Low	F	Positive	POS_D	460
20160831_Still1_0802F03L_08.RCC	0802F03L	2015-08-02	Low	F	Positive	POS_E	94
20160831_Still1_0802F03L_08.RCC	0802F03L	2015-08-02	Low	F	Positive	POS_F	77
20160831_Still1_0802F03L_08.RCC	0802F03L	2015-08-02	Low	F	Negative	NEG_A	12
20160831_Still1_0802F03L_08.RCC	0802F03L	2015-08-02	Low	F	Negative	NEG_B	6
20160831_Still1_0802F03L_08.RCC	0802F03L	2015-08-02	Low	F	Negative	NEG_C	3
20160831_Still1_0802F03L_08.RCC	0802F03L	2015-08-02	Low	F	Negative	NEG_D	8
20160831_Still1_0802F03L_08.RCC	0802F03L	2015-08-02	Low	F	Negative	NEG_E	14
20160831_Still1_0802F03L_08.RCC	0802F03L	2015-08-02	Low	F	Negative	NEG_F	22
20160831_Still1_0802F03L_08.RCC	0802F03L	2015-08-02	Low	F	Negative	NEG_G	4
20160831_Still1_0802F03L_08.RCC	0802F03L	2015-08-02	Low	F	Negative	NEG_H	3
20160831_Still1_0802F03L_08.RCC	0802F03L	2015-08-02	Low	F	Housekeeping	15_8	18437
20160831_Still1_0802F03L_08.RCC	0802F03L	2015-08-02	Low	F	Housekeeping	187_1_CAYC_CAYF_CCAG	21390
20160831_Still1_0802F03L_08.RCC	0802F03L	2015-08-02	Low	F	Housekeeping	comp61175_c0_seq94	211
20160831_Still1_0802F03L_08.RCC	0802F03L	2015-08-02	Low	F	Housekeeping	comp61968_c0_seq6	137
20160831_Still1_0802F03L_08.RCC	0802F03L	2015-08-02	Low	F	Housekeeping	comp62062_c4_seq7	225
20160831_Still1_0802F03L_08.RCC	0802F03L	2015-08-02	Low	F	Housekeeping	comp62406_c1_seq15	329
20160831_Still1_0802F03L_08.RCC	0802F03L	2015-08-02	Low	F	Housekeeping	comp63344_c0_seq12	358
20160831_Still1_0802F03L_08.RCC	0802F03L	2015-08-02	Low	F	Housekeeping	comp64151_c1_seq55	340
20160831_Still1_0802F03L_08.RCC	0802F03L	2015-08-02	Low	F	Target	0_0_CCAG28737.b1_CAYC_CAYF_CCAG	567
20160831_Still1_0802F03L_08.RCC	0802F03L	2015-08-02	Low	F	Target	1252_1_CAYC_CAYF_CCAG	504
20160831_Still1_0802F03L_08.RCC	0802F03L	2015-08-02	Low	F	Target	13341_0_CCAG36642.b1_CAYC_CAYF_CCAG	145
20160831_Still1_0802F03L_08.RCC	0802F03L	2015-08-02	Low	F	Target	14_5_CAYC_CAYF_CCAG	461
20160831_Still1_0802F03L_08.RCC	0802F03L	2015-08-02	Low	F	Target	1432_1_CAYC_CAYF_CCAG	204
20160831_Still1_0802F03L_08.RCC	0802F03L	2015-08-02	Low	F	Target	14392_1_CAYC_CAYF_CCAG	12270
20160831_Still1_0802F03L_08.RCC	0802F03L	2015-08-02	Low	F	Target	14490_0_CCAG5543.g1_CAYC_CAYF_CCAG	23
20160831_Still1_0802F03L_08.RCC	0802F03L	2015-08-02	Low	F	Target	14756_0_CCAG9200.b3_CAYC_CAYF_CCAG	1
20160831_Still1_0802F03L_08.RCC	0802F03L	2015-08-02	Low	F	Target	1748_1_CAYC_CAYF_CCAG	1591
20160831_Still1_0802F03L_08.RCC	0802F03L	2015-08-02	Low	F	Target	178_9_CAYC_CAYF_CCAG	4986
20160831_Still1_0802F03L_08.RCC	0802F03L	2015-08-02	Low	F	Target	1837_1_CAYC_CAYF_CCAG	1965
20160831_Still1_0802F03L_08.RCC	0802F03L	2015-08-02	Low	F	Target	2202_1_CAYC_CAYF_CCAG	879
20160831_Still1_0802F03L_08.RCC	0802F03L	2015-08-02	Low	F	Target	2758_1_CAYC_CAYF_CCAG	2846
20160831_Still1_0802F03L_08.RCC	0802F03L	2015-08-02	Low	F	Target	3280_1_CAYC_CAYF_CCAG	29
20160831_Still1_0802F03L_08.RCC	0802F03L	2015-08-02	Low	F	Target	3280_2_CAYC_CAYF_CCAG	33
20160831_Still1_0802F03L_08.RCC	0802F03L	2015-08-02	Low	F	Target	3397_1_CAYC_CAYF_CCAG	581
20160831_Still1_0802F03L_08.RCC	0802F03L	2015-08-02	Low	F	Target	3924_1_CAYC_CAYF_CCAG	14
20160831_Still1_0802F03L_08.RCC	0802F03L	2015-08-02	Low	F	Target	CCAG48604	30458
20160831_Still1_0802F03L_08.RCC	0802F03L	2015-08-02	Low	F	Target	comp50435_c1_seq2	9520
20160831_Still1_0802F03L_08.RCC	0802F03L	2015-08-02	Low	F	Target	comp55113_c2_seq1	578
20160831_Still1_0802F03L_08.RCC	0802F03L	2015-08-02	Low	F	Target	comp55834_c0_seq3	180
20160831_Still1_0802F03L_08.RCC	0802F03L	2015-08-02	Low	F	Target	comp55959_c0_seq1	3440
20160831_Still1_0802F03L_08.RCC	0802F03L	2015-08-02	Low	F	Target	comp56496_c0_seq4	16
20160831_Still1_0802F03L_08.RCC	0802F03L	2015-08-02	Low	F	Target	comp56747_c2_seq2	710
20160831_Still1_0802F03L_08.RCC	0802F03L	2015-08-02	Low	F	Target	comp57952_c3_seq2	40
20160831_Still1_0802F03L_08.RCC	0802F03L	2015-08-02	Low	F	Target	comp59049_c0_seq1	10504
20160831_Still1_0802F03L_08.RCC	0802F03L	2015-08-02	Low	F	Target	comp60397_c0_seq1	49
20160831_Still1_0802F03L_08.RCC	0802F03L	2015-08-02	Low	F	Target	comp62130_c0_seq4	1488
20160831_Still1_0802F03L_08.RCC	0802F03L	2015-08-02	Low	F	Target	comp63155_c0_seq11	2727
20160831_Still1_0802F03L_08.RCC	0802F03L	2015-08-02	Low	F	Target	comp64021_c3_seq1	1467
20160831_Still1_0802F03L_08.RCC	0802F03L	2015-08-02	Low	F	Target	comp65435_c0_seq8	164
20160831_Still1_0802F03L_08.RCC	0802F03L	2015-08-02	Low	F	Target	comp65993_c0_seq6	244
20160831_Still1_0802F04L_09.RCC	0802F04L	2015-08-02	Low	F	Positive	POS_A	24169
20160831_Still1_0802F04L_09.RCC	0802F04L	2015-08-02	Low	F	Positive	POS_B	5972
20160831_Still1_0802F04L_09.RCC	0802F04L	2015-08-02	Low	F	Positive	POS_C	1435
20160831_Still1_0802F04L_09.RCC	0802F04L	2015-08-02	Low	F	Positive	POS_D	385
20160831_Still1_0802F04L_09.RCC	0802F04L	2015-08-02	Low	F	Positive	POS_E	94
20160831_Still1_0802F04L_09.RCC	0802F04L	2015-08-02	Low	F	Positive	POS_F	81
20160831_Still1_0802F04L_09.RCC	0802F04L	2015-08-02	Low	F	Negative	NEG_A	10
20160831_Still1_0802F04L_09.RCC	0802F04L	2015-08-02	Low	F	Negative	NEG_B	12
20160831_Still1_0802F04L_09.RCC	0802F04L	2015-08-02	Low	F	Negative	NEG_C	2
20160831_Still1_0802F04L_09.RCC	0802F04L	2015-08-02	Low	F	Negative	NEG_D	5
20160831_Still1_0802F04L_09.RCC	0802F04L	2015-08-02	Low	F	Negative	NEG_E	11
20160831_Still1_0802F04L_09.RCC	0802F04L	2015-08-02	Low	F	Negative	NEG_F	24
20160831_Still1_0802F04L_09.RCC	0802F04L	2015-08-02	Low	F	Negative	NEG_G	1
20160831_Still1_0802F04L_09.RCC	0802F04L	2015-08-02	Low	F	Negative	NEG_H	2
20160831_Still1_0802F04L_09.RCC	0802F04L	2015-08-02	Low	F	Housekeeping	15_8	17212
20160831_Still1_0802F04L_09.RCC	0802F04L	2015-08-02	Low	F	Housekeeping	187_1_CAYC_CAYF_CCAG	10753
20160831_Still1_0802F04L_09.RCC	0802F04L	2015-08-02	Low	F	Housekeeping	comp61175_c0_seq94	441
20160831_Still1_0802F04L_09.RCC	0802F04L	2015-08-02	Low	F	Housekeeping	comp61968_c0_seq6	235
20160831_Still1_0802F04L_09.RCC	0802F04L	2015-08-02	Low	F	Housekeeping	comp62062_c4_seq7	484
20160831_Still1_0802F04L_09.RCC	0802F04L	2015-08-02	Low	F	Housekeeping	comp62406_c1_seq15	783
20160831_Still1_0802F04L_09.RCC	0802F04L	2015-08-02	Low	F	Housekeeping	comp63344_c0_seq12	732
20160831_Still1_0802F04L_09.RCC	0802F04L	2015-08-02	Low	F	Housekeeping	comp64151_c1_seq55	550
20160831_Still1_0802F04L_09.RCC	0802F04L	2015-08-02	Low	F	Target	0_0_CCAG28737.b1_CAYC_CAYF_CCAG	511
20160831_Still1_0802F04L_09.RCC	0802F04L	2015-08-02	Low	F	Target	1252_1_CAYC_CAYF_CCAG	996
20160831_Still1_0802F04L_09.RCC	0802F04L	2015-08-02	Low	F	Target	13341_0_CCAG36642.b1_CAYC_CAYF_CCAG	205
20160831_Still1_0802F04L_09.RCC	0802F04L	2015-08-02	Low	F	Target	14_5_CAYC_CAYF_CCAG	629
20160831_Still1_0802F04L_09.RCC	0802F04L	2015-08-02	Low	F	Target	1432_1_CAYC_CAYF_CCAG	218
20160831_Still1_0802F04L_09.RCC	0802F04L	2015-08-02	Low	F	Target	14392_1_CAYC_CAYF_CCAG	12979
20160831_Still1_0802F04L_09.RCC	0802F04L	2015-08-02	Low	F	Target	14490_0_CCAG5543.g1_CAYC_CAYF_CCAG	9
20160831_Still1_0802F04L_09.RCC	0802F04L	2015-08-02	Low	F	Target	14756_0_CCAG9200.b3_CAYC_CAYF_CCAG	3
20160831_Still1_0802F04L_09.RCC	0802F04L	2015-08-02	Low	F	Target	1748_1_CAYC_CAYF_CCAG	3303
20160831_Still1_0802F04L_09.RCC	0802F04L	2015-08-02	Low	F	Target	178_9_CAYC_CAYF_CCAG	19309
20160831_Still1_0802F04L_09.RCC	0802F04L	2015-08-02	Low	F	Target	1837_1_CAYC_CAYF_CCAG	3925
20160831_Still1_0802F04L_09.RCC	0802F04L	2015-08-02	Low	F	Target	2202_1_CAYC_CAYF_CCAG	894
20160831_Still1_0802F04L_09.RCC	0802F04L	2015-08-02	Low	F	Target	2758_1_CAYC_CAYF_CCAG	3923
20160831_Still1_0802F04L_09.RCC	0802F04L	2015-08-02	Low	F	Target	3280_1_CAYC_CAYF_CCAG	19
20160831_Still1_0802F04L_09.RCC	0802F04L	2015-08-02	Low	F	Target	3280_2_CAYC_CAYF_CCAG	27
20160831_Still1_0802F04L_09.RCC	0802F04L	2015-08-02	Low	F	Target	3397_1_CAYC_CAYF_CCAG	781
20160831_Still1_0802F04L_09.RCC	0802F04L	2015-08-02	Low	F	Target	3924_1_CAYC_CAYF_CCAG	13
20160831_Still1_0802F04L_09.RCC	0802F04L	2015-08-02	Low	F	Target	CCAG48604	34638
20160831_Still1_0802F04L_09.RCC	0802F04L	2015-08-02	Low	F	Target	comp50435_c1_seq2	230
20160831_Still1_0802F04L_09.RCC	0802F04L	2015-08-02	Low	F	Target	comp55113_c2_seq1	1333
20160831_Still1_0802F04L_09.RCC	0802F04L	2015-08-02	Low	F	Target	comp55834_c0_seq3	58
20160831_Still1_0802F04L_09.RCC	0802F04L	2015-08-02	Low	F	Target	comp55959_c0_seq1	2640
20160831_Still1_0802F04L_09.RCC	0802F04L	2015-08-02	Low	F	Target	comp56496_c0_seq4	14
20160831_Still1_0802F04L_09.RCC	0802F04L	2015-08-02	Low	F	Target	comp56747_c2_seq2	1000
20160831_Still1_0802F04L_09.RCC	0802F04L	2015-08-02	Low	F	Target	comp57952_c3_seq2	39
20160831_Still1_0802F04L_09.RCC	0802F04L	2015-08-02	Low	F	Target	comp59049_c0_seq1	661
20160831_Still1_0802F04L_09.RCC	0802F04L	2015-08-02	Low	F	Target	comp60397_c0_seq1	61
20160831_Still1_0802F04L_09.RCC	0802F04L	2015-08-02	Low	F	Target	comp62130_c0_seq4	1369
20160831_Still1_0802F04L_09.RCC	0802F04L	2015-08-02	Low	F	Target	comp63155_c0_seq11	1906
20160831_Still1_0802F04L_09.RCC	0802F04L	2015-08-02	Low	F	Target	comp64021_c3_seq1	2475
20160831_Still1_0802F04L_09.RCC	0802F04L	2015-08-02	Low	F	Target	comp65435_c0_seq8	217
20160831_Still1_0802F04L_09.RCC	0802F04L	2015-08-02	Low	F	Target	comp65993_c0_seq6	499
20160831_Still1_0802F05L_10.RCC	0802F05L	2015-08-02	Low	F	Positive	POS_A	24096
20160831_Still1_0802F05L_10.RCC	0802F05L	2015-08-02	Low	F	Positive	POS_B	6071
20160831_Still1_0802F05L_10.RCC	0802F05L	2015-08-02	Low	F	Positive	POS_C	1449
20160831_Still1_0802F05L_10.RCC	0802F05L	2015-08-02	Low	F	Positive	POS_D	419
20160831_Still1_0802F05L_10.RCC	0802F05L	2015-08-02	Low	F	Positive	POS_E	89
20160831_Still1_0802F05L_10.RCC	0802F05L	2015-08-02	Low	F	Positive	POS_F	59
20160831_Still1_0802F05L_10.RCC	0802F05L	2015-08-02	Low	F	Negative	NEG_A	14
20160831_Still1_0802F05L_10.RCC	0802F05L	2015-08-02	Low	F	Negative	NEG_B	15
20160831_Still1_0802F05L_10.RCC	0802F05L	2015-08-02	Low	F	Negative	NEG_C	1
20160831_Still1_0802F05L_10.RCC	0802F05L	2015-08-02	Low	F	Negative	NEG_D	8
20160831_Still1_0802F05L_10.RCC	0802F05L	2015-08-02	Low	F	Negative	NEG_E	9
20160831_Still1_0802F05L_10.RCC	0802F05L	2015-08-02	Low	F	Negative	NEG_F	25
20160831_Still1_0802F05L_10.RCC	0802F05L	2015-08-02	Low	F	Negative	NEG_G	4
20160831_Still1_0802F05L_10.RCC	0802F05L	2015-08-02	Low	F	Negative	NEG_H	4
20160831_Still1_0802F05L_10.RCC	0802F05L	2015-08-02	Low	F	Housekeeping	15_8	41617
20160831_Still1_0802F05L_10.RCC	0802F05L	2015-08-02	Low	F	Housekeeping	187_1_CAYC_CAYF_CCAG	4282
20160831_Still1_0802F05L_10.RCC	0802F05L	2015-08-02	Low	F	Housekeeping	comp61175_c0_seq94	266
20160831_Still1_0802F05L_10.RCC	0802F05L	2015-08-02	Low	F	Housekeeping	comp61968_c0_seq6	183
20160831_Still1_0802F05L_10.RCC	0802F05L	2015-08-02	Low	F	Housekeeping	comp62062_c4_seq7	292
20160831_Still1_0802F05L_10.RCC	0802F05L	2015-08-02	Low	F	Housekeeping	comp62406_c1_seq15	308
20160831_Still1_0802F05L_10.RCC	0802F05L	2015-08-02	Low	F	Housekeeping	comp63344_c0_seq12	312
20160831_Still1_0802F05L_10.RCC	0802F05L	2015-08-02	Low	F	Housekeeping	comp64151_c1_seq55	418
20160831_Still1_0802F05L_10.RCC	0802F05L	2015-08-02	Low	F	Target	0_0_CCAG28737.b1_CAYC_CAYF_CCAG	649
20160831_Still1_0802F05L_10.RCC	0802F05L	2015-08-02	Low	F	Target	1252_1_CAYC_CAYF_CCAG	1968
20160831_Still1_0802F05L_10.RCC	0802F05L	2015-08-02	Low	F	Target	13341_0_CCAG36642.b1_CAYC_CAYF_CCAG	290
20160831_Still1_0802F05L_10.RCC	0802F05L	2015-08-02	Low	F	Target	14_5_CAYC_CAYF_CCAG	1720
20160831_Still1_0802F05L_10.RCC	0802F05L	2015-08-02	Low	F	Target	1432_1_CAYC_CAYF_CCAG	246
20160831_Still1_0802F05L_10.RCC	0802F05L	2015-08-02	Low	F	Target	14392_1_CAYC_CAYF_CCAG	28489
20160831_Still1_0802F05L_10.RCC	0802F05L	2015-08-02	Low	F	Target	14490_0_CCAG5543.g1_CAYC_CAYF_CCAG	24
20160831_Still1_0802F05L_10.RCC	0802F05L	2015-08-02	Low	F	Target	14756_0_CCAG9200.b3_CAYC_CAYF_CCAG	1
20160831_Still1_0802F05L_10.RCC	0802F05L	2015-08-02	Low	F	Target	1748_1_CAYC_CAYF_CCAG	2558
20160831_Still1_0802F05L_10.RCC	0802F05L	2015-08-02	Low	F	Target	178_9_CAYC_CAYF_CCAG	4340
20160831_Still1_0802F05L_10.RCC	0802F05L	2015-08-02	Low	F	Target	1837_1_CAYC_CAYF_CCAG	3886
20160831_Still1_0802F05L_10.RCC	0802F05L	2015-08-02	Low	F	Target	2202_1_CAYC_CAYF_CCAG	2269
20160831_Still1_0802F05L_10.RCC	0802F05L	2015-08-02	Low	F	Target	2758_1_CAYC_CAYF_CCAG	2767
20160831_Still1_0802F05L_10.RCC	0802F05L	2015-08-02	Low	F	Target	3280_1_CAYC_CAYF_CCAG	187
20160831_Still1_0802F05L_10.RCC	0802F05L	2015-08-02	Low	F	Target	3280_2_CAYC_CAYF_CCAG	181
20160831_Still1_0802F05L_10.RCC	0802F05L	2015-08-02	Low	F	Target	3397_1_CAYC_CAYF_CCAG	665
20160831_Still1_0802F05L_10.RCC	0802F05L	2015-08-02	Low	F	Target	3924_1_CAYC_CAYF_CCAG	26
20160831_Still1_0802F05L_10.RCC	0802F05L	2015-08-02	Low	F	Target	CCAG48604	44527
20160831_Still1_0802F05L_10.RCC	0802F05L	2015-08-02	Low	F	Target	comp50435_c1_seq2	470
20160831_Still1_0802F05L_10.RCC	0802F05L	2015-08-02	Low	F	Target	comp55113_c2_seq1	1993
20160831_Still1_0802F05L_10.RCC	0802F05L	2015-08-02	Low	F	Target	comp55834_c0_seq3	50
20160831_Still1_0802F05L_10.RCC	0802F05L	2015-08-02	Low	F	Target	comp55959_c0_seq1	1671
20160831_Still1_0802F05L_10.RCC	0802F05L	2015-08-02	Low	F	Target	comp56496_c0_seq4	21
20160831_Still1_0802F05L_10.RCC	0802F05L	2015-08-02	Low	F	Target	comp56747_c2_seq2	711
20160831_Still1_0802F05L_10.RCC	0802F05L	2015-08-02	Low	F	Target	comp57952_c3_seq2	11
20160831_Still1_0802F05L_10.RCC	0802F05L	2015-08-02	Low	F	Target	comp59049_c0_seq1	11718
20160831_Still1_0802F05L_10.RCC	0802F05L	2015-08-02	Low	F	Target	comp60397_c0_seq1	58
20160831_Still1_0802F05L_10.RCC	0802F05L	2015-08-02	Low	F	Target	comp62130_c0_seq4	675
20160831_Still1_0802F05L_10.RCC	0802F05L	2015-08-02	Low	F	Target	comp63155_c0_seq11	1717
20160831_Still1_0802F05L_10.RCC	0802F05L	2015-08-02	Low	F	Target	comp64021_c3_seq1	905
20160831_Still1_0802F05L_10.RCC	0802F05L	2015-08-02	Low	F	Target	comp65435_c0_seq8	158
20160831_Still1_0802F05L_10.RCC	0802F05L	2015-08-02	Low	F	Target	comp65993_c0_seq6	315
20160831_Still1_0802M01L_01.RCC	0802M01L	2015-08-02	Low	M	Positive	POS_A	26252
20160831_Still1_0802M01L_01.RCC	0802M01L	2015-08-02	Low	M	Positive	POS_B	6472
20160831_Still1_0802M01L_01.RCC	0802M01L	2015-08-02	Low	M	Positive	POS_C	1594
20160831_Still1_0802M01L_01.RCC	0802M01L	2015-08-02	Low	M	Positive	POS_D	411
20160831_Still1_0802M01L_01.RCC	0802M01L	2015-08-02	Low	M	Positive	POS_E	73
20160831_Still1_0802M01L_01.RCC	0802M01L	2015-08-02	Low	M	Positive	POS_F	69
20160831_Still1_0802M01L_01.RCC	0802M01L	2015-08-02	Low	M	Negative	NEG_A	20
20160831_Still1_0802M01L_01.RCC	0802M01L	2015-08-02	Low	M	Negative	NEG_B	22
20160831_Still1_0802M01L_01.RCC	0802M01L	2015-08-02	Low	M	Negative	NEG_C	2
20160831_Still1_0802M01L_01.RCC	0802M01L	2015-08-02	Low	M	Negative	NEG_D	6
20160831_Still1_0802M01L_01.RCC	0802M01L	2015-08-02	Low	M	Negative	NEG_E	19
20160831_Still1_0802M01L_01.RCC	0802M01L	2015-08-02	Low	M	Negative	NEG_F	36
20160831_Still1_0802M01L_01.RCC	0802M01L	2015-08-02	Low	M	Negative	NEG_G	4
20160831_Still1_0802M01L_01.RCC	0802M01L	2015-08-02	Low	M	Negative	NEG_H	5
20160831_Still1_0802M01L_01.RCC	0802M01L	2015-08-02	Low	M	Housekeeping	15_8	43257
20160831_Still1_0802M01L_01.RCC	0802M01L	2015-08-02	Low	M	Housekeeping	187_1_CAYC_CAYF_CCAG	10652
20160831_Still1_0802M01L_01.RCC	0802M01L	2015-08-02	Low	M	Housekeeping	comp61175_c0_seq94	327
20160831_Still1_0802M01L_01.RCC	0802M01L	2015-08-02	Low	M	Housekeeping	comp61968_c0_seq6	208
20160831_Still1_0802M01L_01.RCC	0802M01L	2015-08-02	Low	M	Housekeeping	comp62062_c4_seq7	284
20160831_Still1_0802M01L_01.RCC	0802M01L	2015-08-02	Low	M	Housekeeping	comp62406_c1_seq15	562
20160831_Still1_0802M01L_01.RCC	0802M01L	2015-08-02	Low	M	Housekeeping	comp63344_c0_seq12	537
20160831_Still1_0802M01L_01.RCC	0802M01L	2015-08-02	Low	M	Housekeeping	comp64151_c1_seq55	618
20160831_Still1_0802M01L_01.RCC	0802M01L	2015-08-02	Low	M	Target	0_0_CCAG28737.b1_CAYC_CAYF_CCAG	950
20160831_Still1_0802M01L_01.RCC	0802M01L	2015-08-02	Low	M	Target	1252_1_CAYC_CAYF_CCAG	403
20160831_Still1_0802M01L_01.RCC	0802M01L	2015-08-02	Low	M	Target	13341_0_CCAG36642.b1_CAYC_CAYF_CCAG	199
20160831_Still1_0802M01L_01.RCC	0802M01L	2015-08-02	Low	M	Target	14_5_CAYC_CAYF_CCAG	197
20160831_Still1_0802M01L_01.RCC	0802M01L	2015-08-02	Low	M	Target	1432_1_CAYC_CAYF_CCAG	148
20160831_Still1_0802M01L_01.RCC	0802M01L	2015-08-02	Low	M	Target	14392_1_CAYC_CAYF_CCAG	45
20160831_Still1_0802M01L_01.RCC	0802M01L	2015-08-02	Low	M	Target	14490_0_CCAG5543.g1_CAYC_CAYF_CCAG	19
20160831_Still1_0802M01L_01.RCC	0802M01L	2015-08-02	Low	M	Target	14756_0_CCAG9200.b3_CAYC_CAYF_CCAG	105
20160831_Still1_0802M01L_01.RCC	0802M01L	2015-08-02	Low	M	Target	1748_1_CAYC_CAYF_CCAG	6310
20160831_Still1_0802M01L_01.RCC	0802M01L	2015-08-02	Low	M	Target	178_9_CAYC_CAYF_CCAG	38591
20160831_Still1_0802M01L_01.RCC	0802M01L	2015-08-02	Low	M	Target	1837_1_CAYC_CAYF_CCAG	3239
20160831_Still1_0802M01L_01.RCC	0802M01L	2015-08-02	Low	M	Target	2202_1_CAYC_CAYF_CCAG	1614
20160831_Still1_0802M01L_01.RCC	0802M01L	2015-08-02	Low	M	Target	2758_1_CAYC_CAYF_CCAG	5959
20160831_Still1_0802M01L_01.RCC	0802M01L	2015-08-02	Low	M	Target	3280_1_CAYC_CAYF_CCAG	11
20160831_Still1_0802M01L_01.RCC	0802M01L	2015-08-02	Low	M	Target	3280_2_CAYC_CAYF_CCAG	16
20160831_Still1_0802M01L_01.RCC	0802M01L	2015-08-02	Low	M	Target	3397_1_CAYC_CAYF_CCAG	853
20160831_Still1_0802M01L_01.RCC	0802M01L	2015-08-02	Low	M	Target	3924_1_CAYC_CAYF_CCAG	273
20160831_Still1_0802M01L_01.RCC	0802M01L	2015-08-02	Low	M	Target	CCAG48604	72528
20160831_Still1_0802M01L_01.RCC	0802M01L	2015-08-02	Low	M	Target	comp50435_c1_seq2	31
20160831_Still1_0802M01L_01.RCC	0802M01L	2015-08-02	Low	M	Target	comp55113_c2_seq1	2110
20160831_Still1_0802M01L_01.RCC	0802M01L	2015-08-02	Low	M	Target	comp55834_c0_seq3	6
20160831_Still1_0802M01L_01.RCC	0802M01L	2015-08-02	Low	M	Target	comp55959_c0_seq1	2993
20160831_Still1_0802M01L_01.RCC	0802M01L	2015-08-02	Low	M	Target	comp56496_c0_seq4	21
20160831_Still1_0802M01L_01.RCC	0802M01L	2015-08-02	Low	M	Target	comp56747_c2_seq2	827
20160831_Still1_0802M01L_01.RCC	0802M01L	2015-08-02	Low	M	Target	comp57952_c3_seq2	18
20160831_Still1_0802M01L_01.RCC	0802M01L	2015-08-02	Low	M	Target	comp59049_c0_seq1	76
20160831_Still1_0802M01L_01.RCC	0802M01L	2015-08-02	Low	M	Target	comp60397_c0_seq1	56
20160831_Still1_0802M01L_01.RCC	0802M01L	2015-08-02	Low	M	Target	comp62130_c0_seq4	1378
20160831_Still1_0802M01L_01.RCC	0802M01L	2015-08-02	Low	M	Target	comp63155_c0_seq11	2440
20160831_Still1_0802M01L_01.RCC	0802M01L	2015-08-02	Low	M	Target	comp64021_c3_seq1	1464
20160831_Still1_0802M01L_01.RCC	0802M01L	2015-08-02	Low	M	Target	comp65435_c0_seq8	169
20160831_Still1_0802M01L_01.RCC	0802M01L	2015-08-02	Low	M	Target	comp65993_c0_seq6	482
20160831_Still1_0802M02L_02.RCC	0802M02L	2015-08-02	Low	M	Positive	POS_A	25696
20160831_Still1_0802M02L_02.RCC	0802M02L	2015-08-02	Low	M	Positive	POS_B	6360
20160831_Still1_0802M02L_02.RCC	0802M02L	2015-08-02	Low	M	Positive	POS_C	1717
20160831_Still1_0802M02L_02.RCC	0802M02L	2015-08-02	Low	M	Positive	POS_D	467
20160831_Still1_0802M02L_02.RCC	0802M02L	2015-08-02	Low	M	Positive	POS_E	96
20160831_Still1_0802M02L_02.RCC	0802M02L	2015-08-02	Low	M	Positive	POS_F	76
20160831_Still1_0802M02L_02.RCC	0802M02L	2015-08-02	Low	M	Negative	NEG_A	22
20160831_Still1_0802M02L_02.RCC	0802M02L	2015-08-02	Low	M	Negative	NEG_B	13
20160831_Still1_0802M02L_02.RCC	0802M02L	2015-08-02	Low	M	Negative	NEG_C	2
20160831_Still1_0802M02L_02.RCC	0802M02L	2015-08-02	Low	M	Negative	NEG_D	6
20160831_Still1_0802M02L_02.RCC	0802M02L	2015-08-02	Low	M	Negative	NEG_E	18
20160831_Still1_0802M02L_02.RCC	0802M02L	2015-08-02	Low	M	Negative	NEG_F	36
20160831_Still1_0802M02L_02.RCC	0802M02L	2015-08-02	Low	M	Negative	NEG_G	3
20160831_Still1_0802M02L_02.RCC	0802M02L	2015-08-02	Low	M	Negative	NEG_H	10
20160831_Still1_0802M02L_02.RCC	0802M02L	2015-08-02	Low	M	Housekeeping	15_8	137161
20160831_Still1_0802M02L_02.RCC	0802M02L	2015-08-02	Low	M	Housekeeping	187_1_CAYC_CAYF_CCAG	12221
20160831_Still1_0802M02L_02.RCC	0802M02L	2015-08-02	Low	M	Housekeeping	comp61175_c0_seq94	407
20160831_Still1_0802M02L_02.RCC	0802M02L	2015-08-02	Low	M	Housekeeping	comp61968_c0_seq6	259
20160831_Still1_0802M02L_02.RCC	0802M02L	2015-08-02	Low	M	Housekeeping	comp62062_c4_seq7	338
20160831_Still1_0802M02L_02.RCC	0802M02L	2015-08-02	Low	M	Housekeeping	comp62406_c1_seq15	479
20160831_Still1_0802M02L_02.RCC	0802M02L	2015-08-02	Low	M	Housekeeping	comp63344_c0_seq12	802
20160831_Still1_0802M02L_02.RCC	0802M02L	2015-08-02	Low	M	Housekeeping	comp64151_c1_seq55	1193
20160831_Still1_0802M02L_02.RCC	0802M02L	2015-08-02	Low	M	Target	0_0_CCAG28737.b1_CAYC_CAYF_CCAG	1570
20160831_Still1_0802M02L_02.RCC	0802M02L	2015-08-02	Low	M	Target	1252_1_CAYC_CAYF_CCAG	1819
20160831_Still1_0802M02L_02.RCC	0802M02L	2015-08-02	Low	M	Target	13341_0_CCAG36642.b1_CAYC_CAYF_CCAG	451
20160831_Still1_0802M02L_02.RCC	0802M02L	2015-08-02	Low	M	Target	14_5_CAYC_CAYF_CCAG	4071
20160831_Still1_0802M02L_02.RCC	0802M02L	2015-08-02	Low	M	Target	1432_1_CAYC_CAYF_CCAG	412
20160831_Still1_0802M02L_02.RCC	0802M02L	2015-08-02	Low	M	Target	14392_1_CAYC_CAYF_CCAG	144
20160831_Still1_0802M02L_02.RCC	0802M02L	2015-08-02	Low	M	Target	14490_0_CCAG5543.g1_CAYC_CAYF_CCAG	72
20160831_Still1_0802M02L_02.RCC	0802M02L	2015-08-02	Low	M	Target	14756_0_CCAG9200.b3_CAYC_CAYF_CCAG	91
20160831_Still1_0802M02L_02.RCC	0802M02L	2015-08-02	Low	M	Target	1748_1_CAYC_CAYF_CCAG	5592
20160831_Still1_0802M02L_02.RCC	0802M02L	2015-08-02	Low	M	Target	178_9_CAYC_CAYF_CCAG	10762
20160831_Still1_0802M02L_02.RCC	0802M02L	2015-08-02	Low	M	Target	1837_1_CAYC_CAYF_CCAG	6431
20160831_Still1_0802M02L_02.RCC	0802M02L	2015-08-02	Low	M	Target	2202_1_CAYC_CAYF_CCAG	5500
20160831_Still1_0802M02L_02.RCC	0802M02L	2015-08-02	Low	M	Target	2758_1_CAYC_CAYF_CCAG	7227
20160831_Still1_0802M02L_02.RCC	0802M02L	2015-08-02	Low	M	Target	3280_1_CAYC_CAYF_CCAG	28
20160831_Still1_0802M02L_02.RCC	0802M02L	2015-08-02	Low	M	Target	3280_2_CAYC_CAYF_CCAG	44
20160831_Still1_0802M02L_02.RCC	0802M02L	2015-08-02	Low	M	Target	3397_1_CAYC_CAYF_CCAG	1401
20160831_Still1_0802M02L_02.RCC	0802M02L	2015-08-02	Low	M	Target	3924_1_CAYC_CAYF_CCAG	278
20160831_Still1_0802M02L_02.RCC	0802M02L	2015-08-02	Low	M	Target	CCAG48604	113238
20160831_Still1_0802M02L_02.RCC	0802M02L	2015-08-02	Low	M	Target	comp50435_c1_seq2	1785
20160831_Still1_0802M02L_02.RCC	0802M02L	2015-08-02	Low	M	Target	comp55113_c2_seq1	3359
20160831_Still1_0802M02L_02.RCC	0802M02L	2015-08-02	Low	M	Target	comp55834_c0_seq3	162
20160831_Still1_0802M02L_02.RCC	0802M02L	2015-08-02	Low	M	Target	comp55959_c0_seq1	2901
20160831_Still1_0802M02L_02.RCC	0802M02L	2015-08-02	Low	M	Target	comp56496_c0_seq4	24
20160831_Still1_0802M02L_02.RCC	0802M02L	2015-08-02	Low	M	Target	comp56747_c2_seq2	1048
20160831_Still1_0802M02L_02.RCC	0802M02L	2015-08-02	Low	M	Target	comp57952_c3_seq2	23
20160831_Still1_0802M02L_02.RCC	0802M02L	2015-08-02	Low	M	Target	comp59049_c0_seq1	29650
20160831_Still1_0802M02L_02.RCC	0802M02L	2015-08-02	Low	M	Target	comp60397_c0_seq1	87
20160831_Still1_0802M02L_02.RCC	0802M02L	2015-08-02	Low	M	Target	comp62130_c0_seq4	1311
20160831_Still1_0802M02L_02.RCC	0802M02L	2015-08-02	Low	M	Target	comp63155_c0_seq11	3205
20160831_Still1_0802M02L_02.RCC	0802M02L	2015-08-02	Low	M	Target	comp64021_c3_seq1	2063
20160831_Still1_0802M02L_02.RCC	0802M02L	2015-08-02	Low	M	Target	comp65435_c0_seq8	225
20160831_Still1_0802M02L_02.RCC	0802M02L	2015-08-02	Low	M	Target	comp65993_c0_seq6	1108
20160831_Still1_0802M03L_03.RCC	0802M03L	2015-08-02	Low	M	Positive	POS_A	27367
20160831_Still1_0802M03L_03.RCC	0802M03L	2015-08-02	Low	M	Positive	POS_B	6844
20160831_Still1_0802M03L_03.RCC	0802M03L	2015-08-02	Low	M	Positive	POS_C	1751
20160831_Still1_0802M03L_03.RCC	0802M03L	2015-08-02	Low	M	Positive	POS_D	493
20160831_Still1_0802M03L_03.RCC	0802M03L	2015-08-02	Low	M	Positive	POS_E	96
20160831_Still1_0802M03L_03.RCC	0802M03L	2015-08-02	Low	M	Positive	POS_F	79
20160831_Still1_0802M03L_03.RCC	0802M03L	2015-08-02	Low	M	Negative	NEG_A	15
20160831_Still1_0802M03L_03.RCC	0802M03L	2015-08-02	Low	M	Negative	NEG_B	29
20160831_Still1_0802M03L_03.RCC	0802M03L	2015-08-02	Low	M	Negative	NEG_C	2
20160831_Still1_0802M03L_03.RCC	0802M03L	2015-08-02	Low	M	Negative	NEG_D	6
20160831_Still1_0802M03L_03.RCC	0802M03L	2015-08-02	Low	M	Negative	NEG_E	26
20160831_Still1_0802M03L_03.RCC	0802M03L	2015-08-02	Low	M	Negative	NEG_F	38
20160831_Still1_0802M03L_03.RCC	0802M03L	2015-08-02	Low	M	Negative	NEG_G	5
20160831_Still1_0802M03L_03.RCC	0802M03L	2015-08-02	Low	M	Negative	NEG_H	3
20160831_Still1_0802M03L_03.RCC	0802M03L	2015-08-02	Low	M	Housekeeping	15_8	104151
20160831_Still1_0802M03L_03.RCC	0802M03L	2015-08-02	Low	M	Housekeeping	187_1_CAYC_CAYF_CCAG	9600
20160831_Still1_0802M03L_03.RCC	0802M03L	2015-08-02	Low	M	Housekeeping	comp61175_c0_seq94	497
20160831_Still1_0802M03L_03.RCC	0802M03L	2015-08-02	Low	M	Housekeeping	comp61968_c0_seq6	277
20160831_Still1_0802M03L_03.RCC	0802M03L	2015-08-02	Low	M	Housekeeping	comp62062_c4_seq7	348
20160831_Still1_0802M03L_03.RCC	0802M03L	2015-08-02	Low	M	Housekeeping	comp62406_c1_seq15	630
20160831_Still1_0802M03L_03.RCC	0802M03L	2015-08-02	Low	M	Housekeeping	comp63344_c0_seq12	789
20160831_Still1_0802M03L_03.RCC	0802M03L	2015-08-02	Low	M	Housekeeping	comp64151_c1_seq55	937
20160831_Still1_0802M03L_03.RCC	0802M03L	2015-08-02	Low	M	Target	0_0_CCAG28737.b1_CAYC_CAYF_CCAG	1599
20160831_Still1_0802M03L_03.RCC	0802M03L	2015-08-02	Low	M	Target	1252_1_CAYC_CAYF_CCAG	1199
20160831_Still1_0802M03L_03.RCC	0802M03L	2015-08-02	Low	M	Target	13341_0_CCAG36642.b1_CAYC_CAYF_CCAG	292
20160831_Still1_0802M03L_03.RCC	0802M03L	2015-08-02	Low	M	Target	14_5_CAYC_CAYF_CCAG	546
20160831_Still1_0802M03L_03.RCC	0802M03L	2015-08-02	Low	M	Target	1432_1_CAYC_CAYF_CCAG	310
20160831_Still1_0802M03L_03.RCC	0802M03L	2015-08-02	Low	M	Target	14392_1_CAYC_CAYF_CCAG	106
20160831_Still1_0802M03L_03.RCC	0802M03L	2015-08-02	Low	M	Target	14490_0_CCAG5543.g1_CAYC_CAYF_CCAG	62
20160831_Still1_0802M03L_03.RCC	0802M03L	2015-08-02	Low	M	Target	14756_0_CCAG9200.b3_CAYC_CAYF_CCAG	340
20160831_Still1_0802M03L_03.RCC	0802M03L	2015-08-02	Low	M	Target	1748_1_CAYC_CAYF_CCAG	8982
20160831_Still1_0802M03L_03.RCC	0802M03L	2015-08-02	Low	M	Target	178_9_CAYC_CAYF_CCAG	62543
20160831_Still1_0802M03L_03.RCC	0802M03L	2015-08-02	Low	M	Target	1837_1_CAYC_CAYF_CCAG	7354
20160831_Still1_0802M03L_03.RCC	0802M03L	2015-08-02	Low	M	Target	2202_1_CAYC_CAYF_CCAG	4030
20160831_Still1_0802M03L_03.RCC	0802M03L	2015-08-02	Low	M	Target	2758_1_CAYC_CAYF_CCAG	7231
20160831_Still1_0802M03L_03.RCC	0802M03L	2015-08-02	Low	M	Target	3280_1_CAYC_CAYF_CCAG	11
20160831_Still1_0802M03L_03.RCC	0802M03L	2015-08-02	Low	M	Target	3280_2_CAYC_CAYF_CCAG	26
20160831_Still1_0802M03L_03.RCC	0802M03L	2015-08-02	Low	M	Target	3397_1_CAYC_CAYF_CCAG	1087
20160831_Still1_0802M03L_03.RCC	0802M03L	2015-08-02	Low	M	Target	3924_1_CAYC_CAYF_CCAG	881
20160831_Still1_0802M03L_03.RCC	0802M03L	2015-08-02	Low	M	Target	CCAG48604	122915
20160831_Still1_0802M03L_03.RCC	0802M03L	2015-08-02	Low	M	Target	comp50435_c1_seq2	162
20160831_Still1_0802M03L_03.RCC	0802M03L	2015-08-02	Low	M	Target	comp55113_c2_seq1	3086
20160831_Still1_0802M03L_03.RCC	0802M03L	2015-08-02	Low	M	Target	comp55834_c0_seq3	23
20160831_Still1_0802M03L_03.RCC	0802M03L	2015-08-02	Low	M	Target	comp55959_c0_seq1	3023
20160831_Still1_0802M03L_03.RCC	0802M03L	2015-08-02	Low	M	Target	comp56496_c0_seq4	45
20160831_Still1_0802M03L_03.RCC	0802M03L	2015-08-02	Low	M	Target	comp56747_c2_seq2	1166
20160831_Still1_0802M03L_03.RCC	0802M03L	2015-08-02	Low	M	Target	comp57952_c3_seq2	36
20160831_Still1_0802M03L_03.RCC	0802M03L	2015-08-02	Low	M	Target	comp59049_c0_seq1	2285
20160831_Still1_0802M03L_03.RCC	0802M03L	2015-08-02	Low	M	Target	comp60397_c0_seq1	52
20160831_Still1_0802M03L_03.RCC	0802M03L	2015-08-02	Low	M	Target	comp62130_c0_seq4	1491
20160831_Still1_0802M03L_03.RCC	0802M03L	2015-08-02	Low	M	Target	comp63155_c0_seq11	3152
20160831_Still1_0802M03L_03.RCC	0802M03L	2015-08-02	Low	M	Target	comp64021_c3_seq1	2469
20160831_Still1_0802M03L_03.RCC	0802M03L	2015-08-02	Low	M	Target	comp65435_c0_seq8	232
20160831_Still1_0802M03L_03.RCC	0802M03L	2015-08-02	Low	M	Target	comp65993_c0_seq6	740
20160831_Still1_0802M04L_04.RCC	0802M04L	2015-08-02	Low	M	Positive	POS_A	27751
20160831_Still1_0802M04L_04.RCC	0802M04L	2015-08-02	Low	M	Positive	POS_B	6824
20160831_Still1_0802M04L_04.RCC	0802M04L	2015-08-02	Low	M	Positive	POS_C	1775
20160831_Still1_0802M04L_04.RCC	0802M04L	2015-08-02	Low	M	Positive	POS_D	471
20160831_Still1_0802M04L_04.RCC	0802M04L	2015-08-02	Low	M	Positive	POS_E	112
20160831_Still1_0802M04L_04.RCC	0802M04L	2015-08-02	Low	M	Positive	POS_F	82
20160831_Still1_0802M04L_04.RCC	0802M04L	2015-08-02	Low	M	Negative	NEG_A	18
20160831_Still1_0802M04L_04.RCC	0802M04L	2015-08-02	Low	M	Negative	NEG_B	26
20160831_Still1_0802M04L_04.RCC	0802M04L	2015-08-02	Low	M	Negative	NEG_C	6
20160831_Still1_0802M04L_04.RCC	0802M04L	2015-08-02	Low	M	Negative	NEG_D	5
20160831_Still1_0802M04L_04.RCC	0802M04L	2015-08-02	Low	M	Negative	NEG_E	26
20160831_Still1_0802M04L_04.RCC	0802M04L	2015-08-02	Low	M	Negative	NEG_F	41
20160831_Still1_0802M04L_04.RCC	0802M04L	2015-08-02	Low	M	Negative	NEG_G	3
20160831_Still1_0802M04L_04.RCC	0802M04L	2015-08-02	Low	M	Negative	NEG_H	1
20160831_Still1_0802M04L_04.RCC	0802M04L	2015-08-02	Low	M	Housekeeping	15_8	68700
20160831_Still1_0802M04L_04.RCC	0802M04L	2015-08-02	Low	M	Housekeeping	187_1_CAYC_CAYF_CCAG	7033
20160831_Still1_0802M04L_04.RCC	0802M04L	2015-08-02	Low	M	Housekeeping	comp61175_c0_seq94	414
20160831_Still1_0802M04L_04.RCC	0802M04L	2015-08-02	Low	M	Housekeeping	comp61968_c0_seq6	233
20160831_Still1_0802M04L_04.RCC	0802M04L	2015-08-02	Low	M	Housekeeping	comp62062_c4_seq7	284
20160831_Still1_0802M04L_04.RCC	0802M04L	2015-08-02	Low	M	Housekeeping	comp62406_c1_seq15	464
20160831_Still1_0802M04L_04.RCC	0802M04L	2015-08-02	Low	M	Housekeeping	comp63344_c0_seq12	502
20160831_Still1_0802M04L_04.RCC	0802M04L	2015-08-02	Low	M	Housekeeping	comp64151_c1_seq55	984
20160831_Still1_0802M04L_04.RCC	0802M04L	2015-08-02	Low	M	Target	0_0_CCAG28737.b1_CAYC_CAYF_CCAG	1901
20160831_Still1_0802M04L_04.RCC	0802M04L	2015-08-02	Low	M	Target	1252_1_CAYC_CAYF_CCAG	661
20160831_Still1_0802M04L_04.RCC	0802M04L	2015-08-02	Low	M	Target	13341_0_CCAG36642.b1_CAYC_CAYF_CCAG	228
20160831_Still1_0802M04L_04.RCC	0802M04L	2015-08-02	Low	M	Target	14_5_CAYC_CAYF_CCAG	437
20160831_Still1_0802M04L_04.RCC	0802M04L	2015-08-02	Low	M	Target	1432_1_CAYC_CAYF_CCAG	268
20160831_Still1_0802M04L_04.RCC	0802M04L	2015-08-02	Low	M	Target	14392_1_CAYC_CAYF_CCAG	95
20160831_Still1_0802M04L_04.RCC	0802M04L	2015-08-02	Low	M	Target	14490_0_CCAG5543.g1_CAYC_CAYF_CCAG	31
20160831_Still1_0802M04L_04.RCC	0802M04L	2015-08-02	Low	M	Target	14756_0_CCAG9200.b3_CAYC_CAYF_CCAG	101
20160831_Still1_0802M04L_04.RCC	0802M04L	2015-08-02	Low	M	Target	1748_1_CAYC_CAYF_CCAG	8273
20160831_Still1_0802M04L_04.RCC	0802M04L	2015-08-02	Low	M	Target	178_9_CAYC_CAYF_CCAG	50332
20160831_Still1_0802M04L_04.RCC	0802M04L	2015-08-02	Low	M	Target	1837_1_CAYC_CAYF_CCAG	5193
20160831_Still1_0802M04L_04.RCC	0802M04L	2015-08-02	Low	M	Target	2202_1_CAYC_CAYF_CCAG	4201
20160831_Still1_0802M04L_04.RCC	0802M04L	2015-08-02	Low	M	Target	2758_1_CAYC_CAYF_CCAG	5811
20160831_Still1_0802M04L_04.RCC	0802M04L	2015-08-02	Low	M	Target	3280_1_CAYC_CAYF_CCAG	13
20160831_Still1_0802M04L_04.RCC	0802M04L	2015-08-02	Low	M	Target	3280_2_CAYC_CAYF_CCAG	27
20160831_Still1_0802M04L_04.RCC	0802M04L	2015-08-02	Low	M	Target	3397_1_CAYC_CAYF_CCAG	744
20160831_Still1_0802M04L_04.RCC	0802M04L	2015-08-02	Low	M	Target	3924_1_CAYC_CAYF_CCAG	256
20160831_Still1_0802M04L_04.RCC	0802M04L	2015-08-02	Low	M	Target	CCAG48604	118170
20160831_Still1_0802M04L_04.RCC	0802M04L	2015-08-02	Low	M	Target	comp50435_c1_seq2	65
20160831_Still1_0802M04L_04.RCC	0802M04L	2015-08-02	Low	M	Target	comp55113_c2_seq1	2892
20160831_Still1_0802M04L_04.RCC	0802M04L	2015-08-02	Low	M	Target	comp55834_c0_seq3	17
20160831_Still1_0802M04L_04.RCC	0802M04L	2015-08-02	Low	M	Target	comp55959_c0_seq1	2655
20160831_Still1_0802M04L_04.RCC	0802M04L	2015-08-02	Low	M	Target	comp56496_c0_seq4	35
20160831_Still1_0802M04L_04.RCC	0802M04L	2015-08-02	Low	M	Target	comp56747_c2_seq2	932
20160831_Still1_0802M04L_04.RCC	0802M04L	2015-08-02	Low	M	Target	comp57952_c3_seq2	34
20160831_Still1_0802M04L_04.RCC	0802M04L	2015-08-02	Low	M	Target	comp59049_c0_seq1	1221
20160831_Still1_0802M04L_04.RCC	0802M04L	2015-08-02	Low	M	Target	comp60397_c0_seq1	50
20160831_Still1_0802M04L_04.RCC	0802M04L	2015-08-02	Low	M	Target	comp62130_c0_seq4	1343
20160831_Still1_0802M04L_04.RCC	0802M04L	2015-08-02	Low	M	Target	comp63155_c0_seq11	2432
20160831_Still1_0802M04L_04.RCC	0802M04L	2015-08-02	Low	M	Target	comp64021_c3_seq1	2266
20160831_Still1_0802M04L_04.RCC	0802M04L	2015-08-02	Low	M	Target	comp65435_c0_seq8	155
20160831_Still1_0802M04L_04.RCC	0802M04L	2015-08-02	Low	M	Target	comp65993_c0_seq6	572
20160831_Still1_0802M05L_05.RCC	0802M05L	2015-08-02	Low	M	Positive	POS_A	24401
20160831_Still1_0802M05L_05.RCC	0802M05L	2015-08-02	Low	M	Positive	POS_B	6188
20160831_Still1_0802M05L_05.RCC	0802M05L	2015-08-02	Low	M	Positive	POS_C	1666
20160831_Still1_0802M05L_05.RCC	0802M05L	2015-08-02	Low	M	Positive	POS_D	464
20160831_Still1_0802M05L_05.RCC	0802M05L	2015-08-02	Low	M	Positive	POS_E	105
20160831_Still1_0802M05L_05.RCC	0802M05L	2015-08-02	Low	M	Positive	POS_F	55
20160831_Still1_0802M05L_05.RCC	0802M05L	2015-08-02	Low	M	Negative	NEG_A	10
20160831_Still1_0802M05L_05.RCC	0802M05L	2015-08-02	Low	M	Negative	NEG_B	19
20160831_Still1_0802M05L_05.RCC	0802M05L	2015-08-02	Low	M	Negative	NEG_C	4
20160831_Still1_0802M05L_05.RCC	0802M05L	2015-08-02	Low	M	Negative	NEG_D	4
20160831_Still1_0802M05L_05.RCC	0802M05L	2015-08-02	Low	M	Negative	NEG_E	18
20160831_Still1_0802M05L_05.RCC	0802M05L	2015-08-02	Low	M	Negative	NEG_F	24
20160831_Still1_0802M05L_05.RCC	0802M05L	2015-08-02	Low	M	Negative	NEG_G	1
20160831_Still1_0802M05L_05.RCC	0802M05L	2015-08-02	Low	M	Negative	NEG_H	4
20160831_Still1_0802M05L_05.RCC	0802M05L	2015-08-02	Low	M	Housekeeping	15_8	56534
20160831_Still1_0802M05L_05.RCC	0802M05L	2015-08-02	Low	M	Housekeeping	187_1_CAYC_CAYF_CCAG	12044
20160831_Still1_0802M05L_05.RCC	0802M05L	2015-08-02	Low	M	Housekeeping	comp61175_c0_seq94	457
20160831_Still1_0802M05L_05.RCC	0802M05L	2015-08-02	Low	M	Housekeeping	comp61968_c0_seq6	238
20160831_Still1_0802M05L_05.RCC	0802M05L	2015-08-02	Low	M	Housekeeping	comp62062_c4_seq7	263
20160831_Still1_0802M05L_05.RCC	0802M05L	2015-08-02	Low	M	Housekeeping	comp62406_c1_seq15	560
20160831_Still1_0802M05L_05.RCC	0802M05L	2015-08-02	Low	M	Housekeeping	comp63344_c0_seq12	582
20160831_Still1_0802M05L_05.RCC	0802M05L	2015-08-02	Low	M	Housekeeping	comp64151_c1_seq55	762
20160831_Still1_0802M05L_05.RCC	0802M05L	2015-08-02	Low	M	Target	0_0_CCAG28737.b1_CAYC_CAYF_CCAG	882
20160831_Still1_0802M05L_05.RCC	0802M05L	2015-08-02	Low	M	Target	1252_1_CAYC_CAYF_CCAG	928
20160831_Still1_0802M05L_05.RCC	0802M05L	2015-08-02	Low	M	Target	13341_0_CCAG36642.b1_CAYC_CAYF_CCAG	218
20160831_Still1_0802M05L_05.RCC	0802M05L	2015-08-02	Low	M	Target	14_5_CAYC_CAYF_CCAG	18
20160831_Still1_0802M05L_05.RCC	0802M05L	2015-08-02	Low	M	Target	1432_1_CAYC_CAYF_CCAG	300
20160831_Still1_0802M05L_05.RCC	0802M05L	2015-08-02	Low	M	Target	14392_1_CAYC_CAYF_CCAG	55
20160831_Still1_0802M05L_05.RCC	0802M05L	2015-08-02	Low	M	Target	14490_0_CCAG5543.g1_CAYC_CAYF_CCAG	35
20160831_Still1_0802M05L_05.RCC	0802M05L	2015-08-02	Low	M	Target	14756_0_CCAG9200.b3_CAYC_CAYF_CCAG	81
20160831_Still1_0802M05L_05.RCC	0802M05L	2015-08-02	Low	M	Target	1748_1_CAYC_CAYF_CCAG	6646
20160831_Still1_0802M05L_05.RCC	0802M05L	2015-08-02	Low	M	Target	178_9_CAYC_CAYF_CCAG	50159
20160831_Still1_0802M05L_05.RCC	0802M05L	2015-08-02	Low	M	Target	1837_1_CAYC_CAYF_CCAG	6918
20160831_Still1_0802M05L_05.RCC	0802M05L	2015-08-02	Low	M	Target	2202_1_CAYC_CAYF_CCAG	2547
20160831_Still1_0802M05L_05.RCC	0802M05L	2015-08-02	Low	M	Target	2758_1_CAYC_CAYF_CCAG	6836
20160831_Still1_0802M05L_05.RCC	0802M05L	2015-08-02	Low	M	Target	3280_1_CAYC_CAYF_CCAG	15
20160831_Still1_0802M05L_05.RCC	0802M05L	2015-08-02	Low	M	Target	3280_2_CAYC_CAYF_CCAG	9
20160831_Still1_0802M05L_05.RCC	0802M05L	2015-08-02	Low	M	Target	3397_1_CAYC_CAYF_CCAG	866
20160831_Still1_0802M05L_05.RCC	0802M05L	2015-08-02	Low	M	Target	3924_1_CAYC_CAYF_CCAG	253
20160831_Still1_0802M05L_05.RCC	0802M05L	2015-08-02	Low	M	Target	CCAG48604	75513
20160831_Still1_0802M05L_05.RCC	0802M05L	2015-08-02	Low	M	Target	comp50435_c1_seq2	41
20160831_Still1_0802M05L_05.RCC	0802M05L	2015-08-02	Low	M	Target	comp55113_c2_seq1	2499
20160831_Still1_0802M05L_05.RCC	0802M05L	2015-08-02	Low	M	Target	comp55834_c0_seq3	16
20160831_Still1_0802M05L_05.RCC	0802M05L	2015-08-02	Low	M	Target	comp55959_c0_seq1	2298
20160831_Still1_0802M05L_05.RCC	0802M05L	2015-08-02	Low	M	Target	comp56496_c0_seq4	41
20160831_Still1_0802M05L_05.RCC	0802M05L	2015-08-02	Low	M	Target	comp56747_c2_seq2	1145
20160831_Still1_0802M05L_05.RCC	0802M05L	2015-08-02	Low	M	Target	comp57952_c3_seq2	27
20160831_Still1_0802M05L_05.RCC	0802M05L	2015-08-02	Low	M	Target	comp59049_c0_seq1	724
20160831_Still1_0802M05L_05.RCC	0802M05L	2015-08-02	Low	M	Target	comp60397_c0_seq1	65
20160831_Still1_0802M05L_05.RCC	0802M05L	2015-08-02	Low	M	Target	comp62130_c0_seq4	1219
20160831_Still1_0802M05L_05.RCC	0802M05L	2015-08-02	Low	M	Target	comp63155_c0_seq11	2312
20160831_Still1_0802M05L_05.RCC	0802M05L	2015-08-02	Low	M	Target	comp64021_c3_seq1	1713
20160831_Still1_0802M05L_05.RCC	0802M05L	2015-08-02	Low	M	Target	comp65435_c0_seq8	221
20160831_Still1_0802M05L_05.RCC	0802M05L	2015-08-02	Low	M	Target	comp65993_c0_seq6	516
20160831_Still1_1222F01H_11.RCC	1222F01H	2015-12-22	High	F	Positive	POS_A	10746
20160831_Still1_1222F01H_11.RCC	1222F01H	2015-12-22	High	F	Positive	POS_B	3195
20160831_Still1_1222F01H_11.RCC	1222F01H	2015-12-22	High	F	Positive	POS_C	818
20160831_Still1_1222F01H_11.RCC	1222F01H	2015-12-22	High	F	Positive	POS_D	245
20160831_Still1_1222F01H_11.RCC	1222F01H	2015-12-22	High	F	Positive	POS_E	62
20160831_Still1_1222F01H_11.RCC	1222F01H	2015-12-22	High	F	Positive	POS_F	34
20160831_Still1_1222F01H_11.RCC	1222F01H	2015-12-22	High	F	Negative	NEG_A	3
20160831_Still1_1222F01H_11.RCC	1222F01H	2015-12-22	High	F	Negative	NEG_B	36
20160831_Still1_1222F01H_11.RCC	1222F01H	2015-12-22	High	F	Negative	NEG_C	3
20160831_Still1_1222F01H_11.RCC	1222F01H	2015-12-22	High	F	Negative	NEG_D	3
20160831_Still1_1222F01H_11.RCC	1222F01H	2015-12-22	High	F	Negative	NEG_E	7
20160831_Still1_1222F01H_11.RCC	1222F01H	2015-12-22	High	F	Negative	NEG_F	36
20160831_Still1_1222F01H_11.RCC	1222F01H	2015-12-22	High	F	Negative	NEG_G	21
20160831_Still1_1222F01H_11.RCC	1222F01H	2015-12-22	High	F	Negative	NEG_H	27
20160831_Still1_1222F01H_11.RCC	1222F01H	2015-12-22	High	F	Housekeeping	15_8	50142
20160831_Still1_1222F01H_11.RCC	1222F01H	2015-12-22	High	F	Housekeeping	187_1_CAYC_CAYF_CCAG	9073
20160831_Still1_1222F01H_11.RCC	1222F01H	2015-12-22	High	F	Housekeeping	comp61175_c0_seq94	1012
20160831_Still1_1222F01H_11.RCC	1222F01H	2015-12-22	High	F	Housekeeping	comp61968_c0_seq6	556
20160831_Still1_1222F01H_11.RCC	1222F01H	2015-12-22	High	F	Housekeeping	comp62062_c4_seq7	1230
20160831_Still1_1222F01H_11.RCC	1222F01H	2015-12-22	High	F	Housekeeping	comp62406_c1_seq15	1276
20160831_Still1_1222F01H_11.RCC	1222F01H	2015-12-22	High	F	Housekeeping	comp63344_c0_seq12	1548
20160831_Still1_1222F01H_11.RCC	1222F01H	2015-12-22	High	F	Housekeeping	comp64151_c1_seq55	1119
20160831_Still1_1222F01H_11.RCC	1222F01H	2015-12-22	High	F	Target	0_0_CCAG28737.b1_CAYC_CAYF_CCAG	1083
20160831_Still1_1222F01H_11.RCC	1222F01H	2015-12-22	High	F	Target	1252_1_CAYC_CAYF_CCAG	4488
20160831_Still1_1222F01H_11.RCC	1222F01H	2015-12-22	High	F	Target	13341_0_CCAG36642.b1_CAYC_CAYF_CCAG	619
20160831_Still1_1222F01H_11.RCC	1222F01H	2015-12-22	High	F	Target	14_5_CAYC_CAYF_CCAG	849
20160831_Still1_1222F01H_11.RCC	1222F01H	2015-12-22	High	F	Target	1432_1_CAYC_CAYF_CCAG	638
20160831_Still1_1222F01H_11.RCC	1222F01H	2015-12-22	High	F	Target	14392_1_CAYC_CAYF_CCAG	83383
20160831_Still1_1222F01H_11.RCC	1222F01H	2015-12-22	High	F	Target	14490_0_CCAG5543.g1_CAYC_CAYF_CCAG	103
20160831_Still1_1222F01H_11.RCC	1222F01H	2015-12-22	High	F	Target	14756_0_CCAG9200.b3_CAYC_CAYF_CCAG	2
20160831_Still1_1222F01H_11.RCC	1222F01H	2015-12-22	High	F	Target	1748_1_CAYC_CAYF_CCAG	5061
20160831_Still1_1222F01H_11.RCC	1222F01H	2015-12-22	High	F	Target	178_9_CAYC_CAYF_CCAG	46708
20160831_Still1_1222F01H_11.RCC	1222F01H	2015-12-22	High	F	Target	1837_1_CAYC_CAYF_CCAG	13393
20160831_Still1_1222F01H_11.RCC	1222F01H	2015-12-22	High	F	Target	2202_1_CAYC_CAYF_CCAG	7268
20160831_Still1_1222F01H_11.RCC	1222F01H	2015-12-22	High	F	Target	2758_1_CAYC_CAYF_CCAG	12500
20160831_Still1_1222F01H_11.RCC	1222F01H	2015-12-22	High	F	Target	3280_1_CAYC_CAYF_CCAG	327103
20160831_Still1_1222F01H_11.RCC	1222F01H	2015-12-22	High	F	Target	3280_2_CAYC_CAYF_CCAG	337673
20160831_Still1_1222F01H_11.RCC	1222F01H	2015-12-22	High	F	Target	3397_1_CAYC_CAYF_CCAG	1551
20160831_Still1_1222F01H_11.RCC	1222F01H	2015-12-22	High	F	Target	3924_1_CAYC_CAYF_CCAG	86
20160831_Still1_1222F01H_11.RCC	1222F01H	2015-12-22	High	F	Target	CCAG48604	112302
20160831_Still1_1222F01H_11.RCC	1222F01H	2015-12-22	High	F	Target	comp50435_c1_seq2	118
20160831_Still1_1222F01H_11.RCC	1222F01H	2015-12-22	High	F	Target	comp55113_c2_seq1	2500
20160831_Still1_1222F01H_11.RCC	1222F01H	2015-12-22	High	F	Target	comp55834_c0_seq3	180
20160831_Still1_1222F01H_11.RCC	1222F01H	2015-12-22	High	F	Target	comp55959_c0_seq1	5303
20160831_Still1_1222F01H_11.RCC	1222F01H	2015-12-22	High	F	Target	comp56496_c0_seq4	49
20160831_Still1_1222F01H_11.RCC	1222F01H	2015-12-22	High	F	Target	comp56747_c2_seq2	2628
20160831_Still1_1222F01H_11.RCC	1222F01H	2015-12-22	High	F	Target	comp57952_c3_seq2	42
20160831_Still1_1222F01H_11.RCC	1222F01H	2015-12-22	High	F	Target	comp59049_c0_seq1	1806
20160831_Still1_1222F01H_11.RCC	1222F01H	2015-12-22	High	F	Target	comp60397_c0_seq1	72
20160831_Still1_1222F01H_11.RCC	1222F01H	2015-12-22	High	F	Target	comp62130_c0_seq4	2485
20160831_Still1_1222F01H_11.RCC	1222F01H	2015-12-22	High	F	Target	comp63155_c0_seq11	4348
20160831_Still1_1222F01H_11.RCC	1222F01H	2015-12-22	High	F	Target	comp64021_c3_seq1	3895
20160831_Still1_1222F01H_11.RCC	1222F01H	2015-12-22	High	F	Target	comp65435_c0_seq8	602
20160831_Still1_1222F01H_11.RCC	1222F01H	2015-12-22	High	F	Target	comp65993_c0_seq6	997
20160831_Still1_1222F01L_12.RCC	1222F01L	2015-12-22	Low	F	Positive	POS_A	18347
20160831_Still1_1222F01L_12.RCC	1222F01L	2015-12-22	Low	F	Positive	POS_B	4896
20160831_Still1_1222F01L_12.RCC	1222F01L	2015-12-22	Low	F	Positive	POS_C	1271
20160831_Still1_1222F01L_12.RCC	1222F01L	2015-12-22	Low	F	Positive	POS_D	378
20160831_Still1_1222F01L_12.RCC	1222F01L	2015-12-22	Low	F	Positive	POS_E	102
20160831_Still1_1222F01L_12.RCC	1222F01L	2015-12-22	Low	F	Positive	POS_F	72
20160831_Still1_1222F01L_12.RCC	1222F01L	2015-12-22	Low	F	Negative	NEG_A	20
20160831_Still1_1222F01L_12.RCC	1222F01L	2015-12-22	Low	F	Negative	NEG_B	35
20160831_Still1_1222F01L_12.RCC	1222F01L	2015-12-22	Low	F	Negative	NEG_C	4
20160831_Still1_1222F01L_12.RCC	1222F01L	2015-12-22	Low	F	Negative	NEG_D	2
20160831_Still1_1222F01L_12.RCC	1222F01L	2015-12-22	Low	F	Negative	NEG_E	22
20160831_Still1_1222F01L_12.RCC	1222F01L	2015-12-22	Low	F	Negative	NEG_F	64
20160831_Still1_1222F01L_12.RCC	1222F01L	2015-12-22	Low	F	Negative	NEG_G	11
20160831_Still1_1222F01L_12.RCC	1222F01L	2015-12-22	Low	F	Negative	NEG_H	13
20160831_Still1_1222F01L_12.RCC	1222F01L	2015-12-22	Low	F	Housekeeping	15_8	120280
20160831_Still1_1222F01L_12.RCC	1222F01L	2015-12-22	Low	F	Housekeeping	187_1_CAYC_CAYF_CCAG	13965
20160831_Still1_1222F01L_12.RCC	1222F01L	2015-12-22	Low	F	Housekeeping	comp61175_c0_seq94	1268
20160831_Still1_1222F01L_12.RCC	1222F01L	2015-12-22	Low	F	Housekeeping	comp61968_c0_seq6	754
20160831_Still1_1222F01L_12.RCC	1222F01L	2015-12-22	Low	F	Housekeeping	comp62062_c4_seq7	1383
20160831_Still1_1222F01L_12.RCC	1222F01L	2015-12-22	Low	F	Housekeeping	comp62406_c1_seq15	1831
20160831_Still1_1222F01L_12.RCC	1222F01L	2015-12-22	Low	F	Housekeeping	comp63344_c0_seq12	2405
20160831_Still1_1222F01L_12.RCC	1222F01L	2015-12-22	Low	F	Housekeeping	comp64151_c1_seq55	1715
20160831_Still1_1222F01L_12.RCC	1222F01L	2015-12-22	Low	F	Target	0_0_CCAG28737.b1_CAYC_CAYF_CCAG	1651
20160831_Still1_1222F01L_12.RCC	1222F01L	2015-12-22	Low	F	Target	1252_1_CAYC_CAYF_CCAG	3106
20160831_Still1_1222F01L_12.RCC	1222F01L	2015-12-22	Low	F	Target	13341_0_CCAG36642.b1_CAYC_CAYF_CCAG	823
20160831_Still1_1222F01L_12.RCC	1222F01L	2015-12-22	Low	F	Target	14_5_CAYC_CAYF_CCAG	1316
20160831_Still1_1222F01L_12.RCC	1222F01L	2015-12-22	Low	F	Target	1432_1_CAYC_CAYF_CCAG	801
20160831_Still1_1222F01L_12.RCC	1222F01L	2015-12-22	Low	F	Target	14392_1_CAYC_CAYF_CCAG	54228
20160831_Still1_1222F01L_12.RCC	1222F01L	2015-12-22	Low	F	Target	14490_0_CCAG5543.g1_CAYC_CAYF_CCAG	90
20160831_Still1_1222F01L_12.RCC	1222F01L	2015-12-22	Low	F	Target	14756_0_CCAG9200.b3_CAYC_CAYF_CCAG	2
20160831_Still1_1222F01L_12.RCC	1222F01L	2015-12-22	Low	F	Target	1748_1_CAYC_CAYF_CCAG	12547
20160831_Still1_1222F01L_12.RCC	1222F01L	2015-12-22	Low	F	Target	178_9_CAYC_CAYF_CCAG	101535
20160831_Still1_1222F01L_12.RCC	1222F01L	2015-12-22	Low	F	Target	1837_1_CAYC_CAYF_CCAG	17383
20160831_Still1_1222F01L_12.RCC	1222F01L	2015-12-22	Low	F	Target	2202_1_CAYC_CAYF_CCAG	10551
20160831_Still1_1222F01L_12.RCC	1222F01L	2015-12-22	Low	F	Target	2758_1_CAYC_CAYF_CCAG	23452
20160831_Still1_1222F01L_12.RCC	1222F01L	2015-12-22	Low	F	Target	3280_1_CAYC_CAYF_CCAG	35982
20160831_Still1_1222F01L_12.RCC	1222F01L	2015-12-22	Low	F	Target	3280_2_CAYC_CAYF_CCAG	38660
20160831_Still1_1222F01L_12.RCC	1222F01L	2015-12-22	Low	F	Target	3397_1_CAYC_CAYF_CCAG	2898
20160831_Still1_1222F01L_12.RCC	1222F01L	2015-12-22	Low	F	Target	3924_1_CAYC_CAYF_CCAG	116
20160831_Still1_1222F01L_12.RCC	1222F01L	2015-12-22	Low	F	Target	CCAG48604	191607
20160831_Still1_1222F01L_12.RCC	1222F01L	2015-12-22	Low	F	Target	comp50435_c1_seq2	100
20160831_Still1_1222F01L_12.RCC	1222F01L	2015-12-22	Low	F	Target	comp55113_c2_seq1	5797
20160831_Still1_1222F01L_12.RCC	1222F01L	2015-12-22	Low	F	Target	comp55834_c0_seq3	60
20160831_Still1_1222F01L_12.RCC	1222F01L	2015-12-22	Low	F	Target	comp55959_c0_seq1	7763
20160831_Still1_1222F01L_12.RCC	1222F01L	2015-12-22	Low	F	Target	comp56496_c0_seq4	53
20160831_Still1_1222F01L_12.RCC	1222F01L	2015-12-22	Low	F	Target	comp56747_c2_seq2	3108
20160831_Still1_1222F01L_12.RCC	1222F01L	2015-12-22	Low	F	Target	comp57952_c3_seq2	65
20160831_Still1_1222F01L_12.RCC	1222F01L	2015-12-22	Low	F	Target	comp59049_c0_seq1	3338
20160831_Still1_1222F01L_12.RCC	1222F01L	2015-12-22	Low	F	Target	comp60397_c0_seq1	103
20160831_Still1_1222F01L_12.RCC	1222F01L	2015-12-22	Low	F	Target	comp62130_c0_seq4	3235
20160831_Still1_1222F01L_12.RCC	1222F01L	2015-12-22	Low	F	Target	comp63155_c0_seq11	7642
20160831_Still1_1222F01L_12.RCC	1222F01L	2015-12-22	Low	F	Target	comp64021_c3_seq1	5532
20160831_Still1_1222F01L_12.RCC	1222F01L	2015-12-22	Low	F	Target	comp65435_c0_seq8	703
20160831_Still1_1222F01L_12.RCC	1222F01L	2015-12-22	Low	F	Target	comp65993_c0_seq6	1309
20160901_Still2_0802F01H_06.RCC	0802F01H	2015-08-02	High	F	Positive	POS_A	17594
20160901_Still2_0802F01H_06.RCC	0802F01H	2015-08-02	High	F	Positive	POS_B	4026
20160901_Still2_0802F01H_06.RCC	0802F01H	2015-08-02	High	F	Positive	POS_C	1150
20160901_Still2_0802F01H_06.RCC	0802F01H	2015-08-02	High	F	Positive	POS_D	367
20160901_Still2_0802F01H_06.RCC	0802F01H	2015-08-02	High	F	Positive	POS_E	57
20160901_Still2_0802F01H_06.RCC	0802F01H	2015-08-02	High	F	Positive	POS_F	41
20160901_Still2_0802F01H_06.RCC	0802F01H	2015-08-02	High	F	Negative	NEG_A	12
20160901_Still2_0802F01H_06.RCC	0802F01H	2015-08-02	High	F	Negative	NEG_B	10
20160901_Still2_0802F01H_06.RCC	0802F01H	2015-08-02	High	F	Negative	NEG_C	2
20160901_Still2_0802F01H_06.RCC	0802F01H	2015-08-02	High	F	Negative	NEG_D	4
20160901_Still2_0802F01H_06.RCC	0802F01H	2015-08-02	High	F	Negative	NEG_E	14
20160901_Still2_0802F01H_06.RCC	0802F01H	2015-08-02	High	F	Negative	NEG_F	21
20160901_Still2_0802F01H_06.RCC	0802F01H	2015-08-02	High	F	Negative	NEG_G	1
20160901_Still2_0802F01H_06.RCC	0802F01H	2015-08-02	High	F	Negative	NEG_H	3
20160901_Still2_0802F01H_06.RCC	0802F01H	2015-08-02	High	F	Housekeeping	15_8	28471
20160901_Still2_0802F01H_06.RCC	0802F01H	2015-08-02	High	F	Housekeeping	187_1_CAYC_CAYF_CCAG	3995
20160901_Still2_0802F01H_06.RCC	0802F01H	2015-08-02	High	F	Housekeeping	comp61175_c0_seq94	207
20160901_Still2_0802F01H_06.RCC	0802F01H	2015-08-02	High	F	Housekeeping	comp61968_c0_seq6	132
20160901_Still2_0802F01H_06.RCC	0802F01H	2015-08-02	High	F	Housekeeping	comp62062_c4_seq7	239
20160901_Still2_0802F01H_06.RCC	0802F01H	2015-08-02	High	F	Housekeeping	comp62406_c1_seq15	267
20160901_Still2_0802F01H_06.RCC	0802F01H	2015-08-02	High	F	Housekeeping	comp63344_c0_seq12	270
20160901_Still2_0802F01H_06.RCC	0802F01H	2015-08-02	High	F	Housekeeping	comp64151_c1_seq55	471
20160901_Still2_0802F01H_06.RCC	0802F01H	2015-08-02	High	F	Target	0_0_CCAG28737.b1_CAYC_CAYF_CCAG	423
20160901_Still2_0802F01H_06.RCC	0802F01H	2015-08-02	High	F	Target	1252_1_CAYC_CAYF_CCAG	936
20160901_Still2_0802F01H_06.RCC	0802F01H	2015-08-02	High	F	Target	13341_0_CCAG36642.b1_CAYC_CAYF_CCAG	154
20160901_Still2_0802F01H_06.RCC	0802F01H	2015-08-02	High	F	Target	14_5_CAYC_CAYF_CCAG	405
20160901_Still2_0802F01H_06.RCC	0802F01H	2015-08-02	High	F	Target	1432_1_CAYC_CAYF_CCAG	185
20160901_Still2_0802F01H_06.RCC	0802F01H	2015-08-02	High	F	Target	14392_1_CAYC_CAYF_CCAG	17991
20160901_Still2_0802F01H_06.RCC	0802F01H	2015-08-02	High	F	Target	14490_0_CCAG5543.g1_CAYC_CAYF_CCAG	19
20160901_Still2_0802F01H_06.RCC	0802F01H	2015-08-02	High	F	Target	14756_0_CCAG9200.b3_CAYC_CAYF_CCAG	1
20160901_Still2_0802F01H_06.RCC	0802F01H	2015-08-02	High	F	Target	1748_1_CAYC_CAYF_CCAG	3271
20160901_Still2_0802F01H_06.RCC	0802F01H	2015-08-02	High	F	Target	178_9_CAYC_CAYF_CCAG	7135
20160901_Still2_0802F01H_06.RCC	0802F01H	2015-08-02	High	F	Target	1837_1_CAYC_CAYF_CCAG	3415
20160901_Still2_0802F01H_06.RCC	0802F01H	2015-08-02	High	F	Target	2202_1_CAYC_CAYF_CCAG	2616
20160901_Still2_0802F01H_06.RCC	0802F01H	2015-08-02	High	F	Target	2758_1_CAYC_CAYF_CCAG	2279
20160901_Still2_0802F01H_06.RCC	0802F01H	2015-08-02	High	F	Target	3280_1_CAYC_CAYF_CCAG	761
20160901_Still2_0802F01H_06.RCC	0802F01H	2015-08-02	High	F	Target	3280_2_CAYC_CAYF_CCAG	784
20160901_Still2_0802F01H_06.RCC	0802F01H	2015-08-02	High	F	Target	3397_1_CAYC_CAYF_CCAG	542
20160901_Still2_0802F01H_06.RCC	0802F01H	2015-08-02	High	F	Target	3924_1_CAYC_CAYF_CCAG	30
20160901_Still2_0802F01H_06.RCC	0802F01H	2015-08-02	High	F	Target	CCAG48604	47926
20160901_Still2_0802F01H_06.RCC	0802F01H	2015-08-02	High	F	Target	comp50435_c1_seq2	225
20160901_Still2_0802F01H_06.RCC	0802F01H	2015-08-02	High	F	Target	comp55113_c2_seq1	1965
20160901_Still2_0802F01H_06.RCC	0802F01H	2015-08-02	High	F	Target	comp55834_c0_seq3	31
20160901_Still2_0802F01H_06.RCC	0802F01H	2015-08-02	High	F	Target	comp55959_c0_seq1	1482
20160901_Still2_0802F01H_06.RCC	0802F01H	2015-08-02	High	F	Target	comp56496_c0_seq4	8
20160901_Still2_0802F01H_06.RCC	0802F01H	2015-08-02	High	F	Target	comp56747_c2_seq2	621
20160901_Still2_0802F01H_06.RCC	0802F01H	2015-08-02	High	F	Target	comp57952_c3_seq2	11
20160901_Still2_0802F01H_06.RCC	0802F01H	2015-08-02	High	F	Target	comp59049_c0_seq1	6609
20160901_Still2_0802F01H_06.RCC	0802F01H	2015-08-02	High	F	Target	comp60397_c0_seq1	39
20160901_Still2_0802F01H_06.RCC	0802F01H	2015-08-02	High	F	Target	comp62130_c0_seq4	618
20160901_Still2_0802F01H_06.RCC	0802F01H	2015-08-02	High	F	Target	comp63155_c0_seq11	1109
20160901_Still2_0802F01H_06.RCC	0802F01H	2015-08-02	High	F	Target	comp64021_c3_seq1	1115
20160901_Still2_0802F01H_06.RCC	0802F01H	2015-08-02	High	F	Target	comp65435_c0_seq8	115
20160901_Still2_0802F01H_06.RCC	0802F01H	2015-08-02	High	F	Target	comp65993_c0_seq6	232
20160901_Still2_0802F02H_07.RCC	0802F02H	2015-08-02	High	F	Positive	POS_A	17079
20160901_Still2_0802F02H_07.RCC	0802F02H	2015-08-02	High	F	Positive	POS_B	4044
20160901_Still2_0802F02H_07.RCC	0802F02H	2015-08-02	High	F	Positive	POS_C	1019
20160901_Still2_0802F02H_07.RCC	0802F02H	2015-08-02	High	F	Positive	POS_D	321
20160901_Still2_0802F02H_07.RCC	0802F02H	2015-08-02	High	F	Positive	POS_E	51
20160901_Still2_0802F02H_07.RCC	0802F02H	2015-08-02	High	F	Positive	POS_F	37
20160901_Still2_0802F02H_07.RCC	0802F02H	2015-08-02	High	F	Negative	NEG_A	7
20160901_Still2_0802F02H_07.RCC	0802F02H	2015-08-02	High	F	Negative	NEG_B	13
20160901_Still2_0802F02H_07.RCC	0802F02H	2015-08-02	High	F	Negative	NEG_C	1
20160901_Still2_0802F02H_07.RCC	0802F02H	2015-08-02	High	F	Negative	NEG_D	1
20160901_Still2_0802F02H_07.RCC	0802F02H	2015-08-02	High	F	Negative	NEG_E	18
20160901_Still2_0802F02H_07.RCC	0802F02H	2015-08-02	High	F	Negative	NEG_F	30
20160901_Still2_0802F02H_07.RCC	0802F02H	2015-08-02	High	F	Negative	NEG_G	2
20160901_Still2_0802F02H_07.RCC	0802F02H	2015-08-02	High	F	Negative	NEG_H	5
20160901_Still2_0802F02H_07.RCC	0802F02H	2015-08-02	High	F	Housekeeping	15_8	53402
20160901_Still2_0802F02H_07.RCC	0802F02H	2015-08-02	High	F	Housekeeping	187_1_CAYC_CAYF_CCAG	2444
20160901_Still2_0802F02H_07.RCC	0802F02H	2015-08-02	High	F	Housekeeping	comp61175_c0_seq94	278
20160901_Still2_0802F02H_07.RCC	0802F02H	2015-08-02	High	F	Housekeeping	comp61968_c0_seq6	190
20160901_Still2_0802F02H_07.RCC	0802F02H	2015-08-02	High	F	Housekeeping	comp62062_c4_seq7	242
20160901_Still2_0802F02H_07.RCC	0802F02H	2015-08-02	High	F	Housekeeping	comp62406_c1_seq15	373
20160901_Still2_0802F02H_07.RCC	0802F02H	2015-08-02	High	F	Housekeeping	comp63344_c0_seq12	386
20160901_Still2_0802F02H_07.RCC	0802F02H	2015-08-02	High	F	Housekeeping	comp64151_c1_seq55	573
20160901_Still2_0802F02H_07.RCC	0802F02H	2015-08-02	High	F	Target	0_0_CCAG28737.b1_CAYC_CAYF_CCAG	647
20160901_Still2_0802F02H_07.RCC	0802F02H	2015-08-02	High	F	Target	1252_1_CAYC_CAYF_CCAG	1534
20160901_Still2_0802F02H_07.RCC	0802F02H	2015-08-02	High	F	Target	13341_0_CCAG36642.b1_CAYC_CAYF_CCAG	142
20160901_Still2_0802F02H_07.RCC	0802F02H	2015-08-02	High	F	Target	14_5_CAYC_CAYF_CCAG	232
20160901_Still2_0802F02H_07.RCC	0802F02H	2015-08-02	High	F	Target	1432_1_CAYC_CAYF_CCAG	235
20160901_Still2_0802F02H_07.RCC	0802F02H	2015-08-02	High	F	Target	14392_1_CAYC_CAYF_CCAG	20635
20160901_Still2_0802F02H_07.RCC	0802F02H	2015-08-02	High	F	Target	14490_0_CCAG5543.g1_CAYC_CAYF_CCAG	35
20160901_Still2_0802F02H_07.RCC	0802F02H	2015-08-02	High	F	Target	14756_0_CCAG9200.b3_CAYC_CAYF_CCAG	5
20160901_Still2_0802F02H_07.RCC	0802F02H	2015-08-02	High	F	Target	1748_1_CAYC_CAYF_CCAG	6030
20160901_Still2_0802F02H_07.RCC	0802F02H	2015-08-02	High	F	Target	178_9_CAYC_CAYF_CCAG	15722
20160901_Still2_0802F02H_07.RCC	0802F02H	2015-08-02	High	F	Target	1837_1_CAYC_CAYF_CCAG	5079
20160901_Still2_0802F02H_07.RCC	0802F02H	2015-08-02	High	F	Target	2202_1_CAYC_CAYF_CCAG	3741
20160901_Still2_0802F02H_07.RCC	0802F02H	2015-08-02	High	F	Target	2758_1_CAYC_CAYF_CCAG	3508
20160901_Still2_0802F02H_07.RCC	0802F02H	2015-08-02	High	F	Target	3280_1_CAYC_CAYF_CCAG	11418
20160901_Still2_0802F02H_07.RCC	0802F02H	2015-08-02	High	F	Target	3280_2_CAYC_CAYF_CCAG	11778
20160901_Still2_0802F02H_07.RCC	0802F02H	2015-08-02	High	F	Target	3397_1_CAYC_CAYF_CCAG	506
20160901_Still2_0802F02H_07.RCC	0802F02H	2015-08-02	High	F	Target	3924_1_CAYC_CAYF_CCAG	42
20160901_Still2_0802F02H_07.RCC	0802F02H	2015-08-02	High	F	Target	CCAG48604	77283
20160901_Still2_0802F02H_07.RCC	0802F02H	2015-08-02	High	F	Target	comp50435_c1_seq2	92
20160901_Still2_0802F02H_07.RCC	0802F02H	2015-08-02	High	F	Target	comp55113_c2_seq1	4811
20160901_Still2_0802F02H_07.RCC	0802F02H	2015-08-02	High	F	Target	comp55834_c0_seq3	9
20160901_Still2_0802F02H_07.RCC	0802F02H	2015-08-02	High	F	Target	comp55959_c0_seq1	2016
20160901_Still2_0802F02H_07.RCC	0802F02H	2015-08-02	High	F	Target	comp56496_c0_seq4	24
20160901_Still2_0802F02H_07.RCC	0802F02H	2015-08-02	High	F	Target	comp56747_c2_seq2	732
20160901_Still2_0802F02H_07.RCC	0802F02H	2015-08-02	High	F	Target	comp57952_c3_seq2	17
20160901_Still2_0802F02H_07.RCC	0802F02H	2015-08-02	High	F	Target	comp59049_c0_seq1	3077
20160901_Still2_0802F02H_07.RCC	0802F02H	2015-08-02	High	F	Target	comp60397_c0_seq1	36
20160901_Still2_0802F02H_07.RCC	0802F02H	2015-08-02	High	F	Target	comp62130_c0_seq4	947
20160901_Still2_0802F02H_07.RCC	0802F02H	2015-08-02	High	F	Target	comp63155_c0_seq11	1696
20160901_Still2_0802F02H_07.RCC	0802F02H	2015-08-02	High	F	Target	comp64021_c3_seq1	1576
20160901_Still2_0802F02H_07.RCC	0802F02H	2015-08-02	High	F	Target	comp65435_c0_seq8	143
20160901_Still2_0802F02H_07.RCC	0802F02H	2015-08-02	High	F	Target	comp65993_c0_seq6	441
20160901_Still2_0802F03H_08.RCC	0802F03H	2015-08-02	High	F	Positive	POS_A	15750
20160901_Still2_0802F03H_08.RCC	0802F03H	2015-08-02	High	F	Positive	POS_B	3683
20160901_Still2_0802F03H_08.RCC	0802F03H	2015-08-02	High	F	Positive	POS_C	1039
20160901_Still2_0802F03H_08.RCC	0802F03H	2015-08-02	High	F	Positive	POS_D	299
20160901_Still2_0802F03H_08.RCC	0802F03H	2015-08-02	High	F	Positive	POS_E	62
20160901_Still2_0802F03H_08.RCC	0802F03H	2015-08-02	High	F	Positive	POS_F	37
20160901_Still2_0802F03H_08.RCC	0802F03H	2015-08-02	High	F	Negative	NEG_A	7
20160901_Still2_0802F03H_08.RCC	0802F03H	2015-08-02	High	F	Negative	NEG_B	8
20160901_Still2_0802F03H_08.RCC	0802F03H	2015-08-02	High	F	Negative	NEG_C	1
20160901_Still2_0802F03H_08.RCC	0802F03H	2015-08-02	High	F	Negative	NEG_D	3
20160901_Still2_0802F03H_08.RCC	0802F03H	2015-08-02	High	F	Negative	NEG_E	9
20160901_Still2_0802F03H_08.RCC	0802F03H	2015-08-02	High	F	Negative	NEG_F	41
20160901_Still2_0802F03H_08.RCC	0802F03H	2015-08-02	High	F	Negative	NEG_G	1
20160901_Still2_0802F03H_08.RCC	0802F03H	2015-08-02	High	F	Negative	NEG_H	2
20160901_Still2_0802F03H_08.RCC	0802F03H	2015-08-02	High	F	Housekeeping	15_8	27136
20160901_Still2_0802F03H_08.RCC	0802F03H	2015-08-02	High	F	Housekeeping	187_1_CAYC_CAYF_CCAG	2794
20160901_Still2_0802F03H_08.RCC	0802F03H	2015-08-02	High	F	Housekeeping	comp61175_c0_seq94	203
20160901_Still2_0802F03H_08.RCC	0802F03H	2015-08-02	High	F	Housekeeping	comp61968_c0_seq6	138
20160901_Still2_0802F03H_08.RCC	0802F03H	2015-08-02	High	F	Housekeeping	comp62062_c4_seq7	256
20160901_Still2_0802F03H_08.RCC	0802F03H	2015-08-02	High	F	Housekeeping	comp62406_c1_seq15	274
20160901_Still2_0802F03H_08.RCC	0802F03H	2015-08-02	High	F	Housekeeping	comp63344_c0_seq12	251
20160901_Still2_0802F03H_08.RCC	0802F03H	2015-08-02	High	F	Housekeeping	comp64151_c1_seq55	375
20160901_Still2_0802F03H_08.RCC	0802F03H	2015-08-02	High	F	Target	0_0_CCAG28737.b1_CAYC_CAYF_CCAG	530
20160901_Still2_0802F03H_08.RCC	0802F03H	2015-08-02	High	F	Target	1252_1_CAYC_CAYF_CCAG	1005
20160901_Still2_0802F03H_08.RCC	0802F03H	2015-08-02	High	F	Target	13341_0_CCAG36642.b1_CAYC_CAYF_CCAG	145
20160901_Still2_0802F03H_08.RCC	0802F03H	2015-08-02	High	F	Target	14_5_CAYC_CAYF_CCAG	214
20160901_Still2_0802F03H_08.RCC	0802F03H	2015-08-02	High	F	Target	1432_1_CAYC_CAYF_CCAG	164
20160901_Still2_0802F03H_08.RCC	0802F03H	2015-08-02	High	F	Target	14392_1_CAYC_CAYF_CCAG	21036
20160901_Still2_0802F03H_08.RCC	0802F03H	2015-08-02	High	F	Target	14490_0_CCAG5543.g1_CAYC_CAYF_CCAG	21
20160901_Still2_0802F03H_08.RCC	0802F03H	2015-08-02	High	F	Target	14756_0_CCAG9200.b3_CAYC_CAYF_CCAG	1
20160901_Still2_0802F03H_08.RCC	0802F03H	2015-08-02	High	F	Target	1748_1_CAYC_CAYF_CCAG	2935
20160901_Still2_0802F03H_08.RCC	0802F03H	2015-08-02	High	F	Target	178_9_CAYC_CAYF_CCAG	20193
20160901_Still2_0802F03H_08.RCC	0802F03H	2015-08-02	High	F	Target	1837_1_CAYC_CAYF_CCAG	3457
20160901_Still2_0802F03H_08.RCC	0802F03H	2015-08-02	High	F	Target	2202_1_CAYC_CAYF_CCAG	2796
20160901_Still2_0802F03H_08.RCC	0802F03H	2015-08-02	High	F	Target	2758_1_CAYC_CAYF_CCAG	2977
20160901_Still2_0802F03H_08.RCC	0802F03H	2015-08-02	High	F	Target	3280_1_CAYC_CAYF_CCAG	2028
20160901_Still2_0802F03H_08.RCC	0802F03H	2015-08-02	High	F	Target	3280_2_CAYC_CAYF_CCAG	2005
20160901_Still2_0802F03H_08.RCC	0802F03H	2015-08-02	High	F	Target	3397_1_CAYC_CAYF_CCAG	420
20160901_Still2_0802F03H_08.RCC	0802F03H	2015-08-02	High	F	Target	3924_1_CAYC_CAYF_CCAG	34
20160901_Still2_0802F03H_08.RCC	0802F03H	2015-08-02	High	F	Target	CCAG48604	50503
20160901_Still2_0802F03H_08.RCC	0802F03H	2015-08-02	High	F	Target	comp50435_c1_seq2	47
20160901_Still2_0802F03H_08.RCC	0802F03H	2015-08-02	High	F	Target	comp55113_c2_seq1	2387
20160901_Still2_0802F03H_08.RCC	0802F03H	2015-08-02	High	F	Target	comp55834_c0_seq3	7
20160901_Still2_0802F03H_08.RCC	0802F03H	2015-08-02	High	F	Target	comp55959_c0_seq1	1459
20160901_Still2_0802F03H_08.RCC	0802F03H	2015-08-02	High	F	Target	comp56496_c0_seq4	18
20160901_Still2_0802F03H_08.RCC	0802F03H	2015-08-02	High	F	Target	comp56747_c2_seq2	650
20160901_Still2_0802F03H_08.RCC	0802F03H	2015-08-02	High	F	Target	comp57952_c3_seq2	18
20160901_Still2_0802F03H_08.RCC	0802F03H	2015-08-02	High	F	Target	comp59049_c0_seq1	600
20160901_Still2_0802F03H_08.RCC	0802F03H	2015-08-02	High	F	Target	comp60397_c0_seq1	13
20160901_Still2_0802F03H_08.RCC	0802F03H	2015-08-02	High	F	Target	comp62130_c0_seq4	672
20160901_Still2_0802F03H_08.RCC	0802F03H	2015-08-02	High	F	Target	comp63155_c0_seq11	1135
20160901_Still2_0802F03H_08.RCC	0802F03H	2015-08-02	High	F	Target	comp64021_c3_seq1	1169
20160901_Still2_0802F03H_08.RCC	0802F03H	2015-08-02	High	F	Target	comp65435_c0_seq8	115
20160901_Still2_0802F03H_08.RCC	0802F03H	2015-08-02	High	F	Target	comp65993_c0_seq6	288
20160901_Still2_0802F04H_09.RCC	0802F04H	2015-08-02	High	F	Positive	POS_A	16699
20160901_Still2_0802F04H_09.RCC	0802F04H	2015-08-02	High	F	Positive	POS_B	4159
20160901_Still2_0802F04H_09.RCC	0802F04H	2015-08-02	High	F	Positive	POS_C	1198
20160901_Still2_0802F04H_09.RCC	0802F04H	2015-08-02	High	F	Positive	POS_D	332
20160901_Still2_0802F04H_09.RCC	0802F04H	2015-08-02	High	F	Positive	POS_E	72
20160901_Still2_0802F04H_09.RCC	0802F04H	2015-08-02	High	F	Positive	POS_F	36
20160901_Still2_0802F04H_09.RCC	0802F04H	2015-08-02	High	F	Negative	NEG_A	8
20160901_Still2_0802F04H_09.RCC	0802F04H	2015-08-02	High	F	Negative	NEG_B	7
20160901_Still2_0802F04H_09.RCC	0802F04H	2015-08-02	High	F	Negative	NEG_C	3
20160901_Still2_0802F04H_09.RCC	0802F04H	2015-08-02	High	F	Negative	NEG_D	1
20160901_Still2_0802F04H_09.RCC	0802F04H	2015-08-02	High	F	Negative	NEG_E	9
20160901_Still2_0802F04H_09.RCC	0802F04H	2015-08-02	High	F	Negative	NEG_F	7
20160901_Still2_0802F04H_09.RCC	0802F04H	2015-08-02	High	F	Negative	NEG_G	1
20160901_Still2_0802F04H_09.RCC	0802F04H	2015-08-02	High	F	Negative	NEG_H	1
20160901_Still2_0802F04H_09.RCC	0802F04H	2015-08-02	High	F	Housekeeping	15_8	10285
20160901_Still2_0802F04H_09.RCC	0802F04H	2015-08-02	High	F	Housekeeping	187_1_CAYC_CAYF_CCAG	4494
20160901_Still2_0802F04H_09.RCC	0802F04H	2015-08-02	High	F	Housekeeping	comp61175_c0_seq94	89
20160901_Still2_0802F04H_09.RCC	0802F04H	2015-08-02	High	F	Housekeeping	comp61968_c0_seq6	32
20160901_Still2_0802F04H_09.RCC	0802F04H	2015-08-02	High	F	Housekeeping	comp62062_c4_seq7	73
20160901_Still2_0802F04H_09.RCC	0802F04H	2015-08-02	High	F	Housekeeping	comp62406_c1_seq15	94
20160901_Still2_0802F04H_09.RCC	0802F04H	2015-08-02	High	F	Housekeeping	comp63344_c0_seq12	87
20160901_Still2_0802F04H_09.RCC	0802F04H	2015-08-02	High	F	Housekeeping	comp64151_c1_seq55	99
20160901_Still2_0802F04H_09.RCC	0802F04H	2015-08-02	High	F	Target	0_0_CCAG28737.b1_CAYC_CAYF_CCAG	165
20160901_Still2_0802F04H_09.RCC	0802F04H	2015-08-02	High	F	Target	1252_1_CAYC_CAYF_CCAG	675
20160901_Still2_0802F04H_09.RCC	0802F04H	2015-08-02	High	F	Target	13341_0_CCAG36642.b1_CAYC_CAYF_CCAG	54
20160901_Still2_0802F04H_09.RCC	0802F04H	2015-08-02	High	F	Target	14_5_CAYC_CAYF_CCAG	5
20160901_Still2_0802F04H_09.RCC	0802F04H	2015-08-02	High	F	Target	1432_1_CAYC_CAYF_CCAG	62
20160901_Still2_0802F04H_09.RCC	0802F04H	2015-08-02	High	F	Target	14392_1_CAYC_CAYF_CCAG	9390
20160901_Still2_0802F04H_09.RCC	0802F04H	2015-08-02	High	F	Target	14490_0_CCAG5543.g1_CAYC_CAYF_CCAG	7
20160901_Still2_0802F04H_09.RCC	0802F04H	2015-08-02	High	F	Target	14756_0_CCAG9200.b3_CAYC_CAYF_CCAG	1
20160901_Still2_0802F04H_09.RCC	0802F04H	2015-08-02	High	F	Target	1748_1_CAYC_CAYF_CCAG	462
20160901_Still2_0802F04H_09.RCC	0802F04H	2015-08-02	High	F	Target	178_9_CAYC_CAYF_CCAG	1620
20160901_Still2_0802F04H_09.RCC	0802F04H	2015-08-02	High	F	Target	1837_1_CAYC_CAYF_CCAG	754
20160901_Still2_0802F04H_09.RCC	0802F04H	2015-08-02	High	F	Target	2202_1_CAYC_CAYF_CCAG	172
20160901_Still2_0802F04H_09.RCC	0802F04H	2015-08-02	High	F	Target	2758_1_CAYC_CAYF_CCAG	803
20160901_Still2_0802F04H_09.RCC	0802F04H	2015-08-02	High	F	Target	3280_1_CAYC_CAYF_CCAG	3
20160901_Still2_0802F04H_09.RCC	0802F04H	2015-08-02	High	F	Target	3280_2_CAYC_CAYF_CCAG	8
20160901_Still2_0802F04H_09.RCC	0802F04H	2015-08-02	High	F	Target	3397_1_CAYC_CAYF_CCAG	186
20160901_Still2_0802F04H_09.RCC	0802F04H	2015-08-02	High	F	Target	3924_1_CAYC_CAYF_CCAG	8
20160901_Still2_0802F04H_09.RCC	0802F04H	2015-08-02	High	F	Target	CCAG48604	13552
20160901_Still2_0802F04H_09.RCC	0802F04H	2015-08-02	High	F	Target	comp50435_c1_seq2	639
20160901_Still2_0802F04H_09.RCC	0802F04H	2015-08-02	High	F	Target	comp55113_c2_seq1	139
20160901_Still2_0802F04H_09.RCC	0802F04H	2015-08-02	High	F	Target	comp55834_c0_seq3	24
20160901_Still2_0802F04H_09.RCC	0802F04H	2015-08-02	High	F	Target	comp55959_c0_seq1	1438
20160901_Still2_0802F04H_09.RCC	0802F04H	2015-08-02	High	F	Target	comp56496_c0_seq4	6
20160901_Still2_0802F04H_09.RCC	0802F04H	2015-08-02	High	F	Target	comp56747_c2_seq2	214
20160901_Still2_0802F04H_09.RCC	0802F04H	2015-08-02	High	F	Target	comp57952_c3_seq2	12
20160901_Still2_0802F04H_09.RCC	0802F04H	2015-08-02	High	F	Target	comp59049_c0_seq1	1964
20160901_Still2_0802F04H_09.RCC	0802F04H	2015-08-02	High	F	Target	comp60397_c0_seq1	10
20160901_Still2_0802F04H_09.RCC	0802F04H	2015-08-02	High	F	Target	comp62130_c0_seq4	394
20160901_Still2_0802F04H_09.RCC	0802F04H	2015-08-02	High	F	Target	comp63155_c0_seq11	885
20160901_Still2_0802F04H_09.RCC	0802F04H	2015-08-02	High	F	Target	comp64021_c3_seq1	696
20160901_Still2_0802F04H_09.RCC	0802F04H	2015-08-02	High	F	Target	comp65435_c0_seq8	50
20160901_Still2_0802F04H_09.RCC	0802F04H	2015-08-02	High	F	Target	comp65993_c0_seq6	94
20160901_Still2_0802F05H_10.RCC	0802F05H	2015-08-02	High	F	Positive	POS_A	15221
20160901_Still2_0802F05H_10.RCC	0802F05H	2015-08-02	High	F	Positive	POS_B	3680
20160901_Still2_0802F05H_10.RCC	0802F05H	2015-08-02	High	F	Positive	POS_C	1019
20160901_Still2_0802F05H_10.RCC	0802F05H	2015-08-02	High	F	Positive	POS_D	308
20160901_Still2_0802F05H_10.RCC	0802F05H	2015-08-02	High	F	Positive	POS_E	39
20160901_Still2_0802F05H_10.RCC	0802F05H	2015-08-02	High	F	Positive	POS_F	34
20160901_Still2_0802F05H_10.RCC	0802F05H	2015-08-02	High	F	Negative	NEG_A	11
20160901_Still2_0802F05H_10.RCC	0802F05H	2015-08-02	High	F	Negative	NEG_B	6
20160901_Still2_0802F05H_10.RCC	0802F05H	2015-08-02	High	F	Negative	NEG_C	1
20160901_Still2_0802F05H_10.RCC	0802F05H	2015-08-02	High	F	Negative	NEG_D	2
20160901_Still2_0802F05H_10.RCC	0802F05H	2015-08-02	High	F	Negative	NEG_E	9
20160901_Still2_0802F05H_10.RCC	0802F05H	2015-08-02	High	F	Negative	NEG_F	15
20160901_Still2_0802F05H_10.RCC	0802F05H	2015-08-02	High	F	Negative	NEG_G	1
20160901_Still2_0802F05H_10.RCC	0802F05H	2015-08-02	High	F	Negative	NEG_H	5
20160901_Still2_0802F05H_10.RCC	0802F05H	2015-08-02	High	F	Housekeeping	15_8	9458
20160901_Still2_0802F05H_10.RCC	0802F05H	2015-08-02	High	F	Housekeeping	187_1_CAYC_CAYF_CCAG	12353
20160901_Still2_0802F05H_10.RCC	0802F05H	2015-08-02	High	F	Housekeeping	comp61175_c0_seq94	100
20160901_Still2_0802F05H_10.RCC	0802F05H	2015-08-02	High	F	Housekeeping	comp61968_c0_seq6	59
20160901_Still2_0802F05H_10.RCC	0802F05H	2015-08-02	High	F	Housekeeping	comp62062_c4_seq7	104
20160901_Still2_0802F05H_10.RCC	0802F05H	2015-08-02	High	F	Housekeeping	comp62406_c1_seq15	131
20160901_Still2_0802F05H_10.RCC	0802F05H	2015-08-02	High	F	Housekeeping	comp63344_c0_seq12	159
20160901_Still2_0802F05H_10.RCC	0802F05H	2015-08-02	High	F	Housekeeping	comp64151_c1_seq55	209
20160901_Still2_0802F05H_10.RCC	0802F05H	2015-08-02	High	F	Target	0_0_CCAG28737.b1_CAYC_CAYF_CCAG	237
20160901_Still2_0802F05H_10.RCC	0802F05H	2015-08-02	High	F	Target	1252_1_CAYC_CAYF_CCAG	537
20160901_Still2_0802F05H_10.RCC	0802F05H	2015-08-02	High	F	Target	13341_0_CCAG36642.b1_CAYC_CAYF_CCAG	92
20160901_Still2_0802F05H_10.RCC	0802F05H	2015-08-02	High	F	Target	14_5_CAYC_CAYF_CCAG	234
20160901_Still2_0802F05H_10.RCC	0802F05H	2015-08-02	High	F	Target	1432_1_CAYC_CAYF_CCAG	152
20160901_Still2_0802F05H_10.RCC	0802F05H	2015-08-02	High	F	Target	14392_1_CAYC_CAYF_CCAG	9190
20160901_Still2_0802F05H_10.RCC	0802F05H	2015-08-02	High	F	Target	14490_0_CCAG5543.g1_CAYC_CAYF_CCAG	12
20160901_Still2_0802F05H_10.RCC	0802F05H	2015-08-02	High	F	Target	14756_0_CCAG9200.b3_CAYC_CAYF_CCAG	2
20160901_Still2_0802F05H_10.RCC	0802F05H	2015-08-02	High	F	Target	1748_1_CAYC_CAYF_CCAG	619
20160901_Still2_0802F05H_10.RCC	0802F05H	2015-08-02	High	F	Target	178_9_CAYC_CAYF_CCAG	1775
20160901_Still2_0802F05H_10.RCC	0802F05H	2015-08-02	High	F	Target	1837_1_CAYC_CAYF_CCAG	839
20160901_Still2_0802F05H_10.RCC	0802F05H	2015-08-02	High	F	Target	2202_1_CAYC_CAYF_CCAG	303
20160901_Still2_0802F05H_10.RCC	0802F05H	2015-08-02	High	F	Target	2758_1_CAYC_CAYF_CCAG	1230
20160901_Still2_0802F05H_10.RCC	0802F05H	2015-08-02	High	F	Target	3280_1_CAYC_CAYF_CCAG	688
20160901_Still2_0802F05H_10.RCC	0802F05H	2015-08-02	High	F	Target	3280_2_CAYC_CAYF_CCAG	669
20160901_Still2_0802F05H_10.RCC	0802F05H	2015-08-02	High	F	Target	3397_1_CAYC_CAYF_CCAG	222
20160901_Still2_0802F05H_10.RCC	0802F05H	2015-08-02	High	F	Target	3924_1_CAYC_CAYF_CCAG	8
20160901_Still2_0802F05H_10.RCC	0802F05H	2015-08-02	High	F	Target	CCAG48604	18136
20160901_Still2_0802F05H_10.RCC	0802F05H	2015-08-02	High	F	Target	comp50435_c1_seq2	5758
20160901_Still2_0802F05H_10.RCC	0802F05H	2015-08-02	High	F	Target	comp55113_c2_seq1	388
20160901_Still2_0802F05H_10.RCC	0802F05H	2015-08-02	High	F	Target	comp55834_c0_seq3	42
20160901_Still2_0802F05H_10.RCC	0802F05H	2015-08-02	High	F	Target	comp55959_c0_seq1	3191
20160901_Still2_0802F05H_10.RCC	0802F05H	2015-08-02	High	F	Target	comp56496_c0_seq4	8
20160901_Still2_0802F05H_10.RCC	0802F05H	2015-08-02	High	F	Target	comp56747_c2_seq2	295
20160901_Still2_0802F05H_10.RCC	0802F05H	2015-08-02	High	F	Target	comp57952_c3_seq2	16
20160901_Still2_0802F05H_10.RCC	0802F05H	2015-08-02	High	F	Target	comp59049_c0_seq1	5776
20160901_Still2_0802F05H_10.RCC	0802F05H	2015-08-02	High	F	Target	comp60397_c0_seq1	21
20160901_Still2_0802F05H_10.RCC	0802F05H	2015-08-02	High	F	Target	comp62130_c0_seq4	940
20160901_Still2_0802F05H_10.RCC	0802F05H	2015-08-02	High	F	Target	comp63155_c0_seq11	1810
20160901_Still2_0802F05H_10.RCC	0802F05H	2015-08-02	High	F	Target	comp64021_c3_seq1	1147
20160901_Still2_0802F05H_10.RCC	0802F05H	2015-08-02	High	F	Target	comp65435_c0_seq8	59
20160901_Still2_0802F05H_10.RCC	0802F05H	2015-08-02	High	F	Target	comp65993_c0_seq6	174
20160901_Still2_0802M01H_01.RCC	0802M01H	2015-08-02	High	M	Positive	POS_A	14279
20160901_Still2_0802M01H_01.RCC	0802M01H	2015-08-02	High	M	Positive	POS_B	3765
20160901_Still2_0802M01H_01.RCC	0802M01H	2015-08-02	High	M	Positive	POS_C	1041
20160901_Still2_0802M01H_01.RCC	0802M01H	2015-08-02	High	M	Positive	POS_D	303
20160901_Still2_0802M01H_01.RCC	0802M01H	2015-08-02	High	M	Positive	POS_E	52
20160901_Still2_0802M01H_01.RCC	0802M01H	2015-08-02	High	M	Positive	POS_F	43
20160901_Still2_0802M01H_01.RCC	0802M01H	2015-08-02	High	M	Negative	NEG_A	7
20160901_Still2_0802M01H_01.RCC	0802M01H	2015-08-02	High	M	Negative	NEG_B	11
20160901_Still2_0802M01H_01.RCC	0802M01H	2015-08-02	High	M	Negative	NEG_C	3
20160901_Still2_0802M01H_01.RCC	0802M01H	2015-08-02	High	M	Negative	NEG_D	5
20160901_Still2_0802M01H_01.RCC	0802M01H	2015-08-02	High	M	Negative	NEG_E	12
20160901_Still2_0802M01H_01.RCC	0802M01H	2015-08-02	High	M	Negative	NEG_F	16
20160901_Still2_0802M01H_01.RCC	0802M01H	2015-08-02	High	M	Negative	NEG_G	2
20160901_Still2_0802M01H_01.RCC	0802M01H	2015-08-02	High	M	Negative	NEG_H	6
20160901_Still2_0802M01H_01.RCC	0802M01H	2015-08-02	High	M	Housekeeping	15_8	95150
20160901_Still2_0802M01H_01.RCC	0802M01H	2015-08-02	High	M	Housekeeping	187_1_CAYC_CAYF_CCAG	5432
20160901_Still2_0802M01H_01.RCC	0802M01H	2015-08-02	High	M	Housekeeping	comp61175_c0_seq94	302
20160901_Still2_0802M01H_01.RCC	0802M01H	2015-08-02	High	M	Housekeeping	comp61968_c0_seq6	111
20160901_Still2_0802M01H_01.RCC	0802M01H	2015-08-02	High	M	Housekeeping	comp62062_c4_seq7	142
20160901_Still2_0802M01H_01.RCC	0802M01H	2015-08-02	High	M	Housekeeping	comp62406_c1_seq15	305
20160901_Still2_0802M01H_01.RCC	0802M01H	2015-08-02	High	M	Housekeeping	comp63344_c0_seq12	377
20160901_Still2_0802M01H_01.RCC	0802M01H	2015-08-02	High	M	Housekeeping	comp64151_c1_seq55	426
20160901_Still2_0802M01H_01.RCC	0802M01H	2015-08-02	High	M	Target	0_0_CCAG28737.b1_CAYC_CAYF_CCAG	286
20160901_Still2_0802M01H_01.RCC	0802M01H	2015-08-02	High	M	Target	1252_1_CAYC_CAYF_CCAG	492
20160901_Still2_0802M01H_01.RCC	0802M01H	2015-08-02	High	M	Target	13341_0_CCAG36642.b1_CAYC_CAYF_CCAG	127
20160901_Still2_0802M01H_01.RCC	0802M01H	2015-08-02	High	M	Target	14_5_CAYC_CAYF_CCAG	395
20160901_Still2_0802M01H_01.RCC	0802M01H	2015-08-02	High	M	Target	1432_1_CAYC_CAYF_CCAG	162
20160901_Still2_0802M01H_01.RCC	0802M01H	2015-08-02	High	M	Target	14392_1_CAYC_CAYF_CCAG	36
20160901_Still2_0802M01H_01.RCC	0802M01H	2015-08-02	High	M	Target	14490_0_CCAG5543.g1_CAYC_CAYF_CCAG	48
20160901_Still2_0802M01H_01.RCC	0802M01H	2015-08-02	High	M	Target	14756_0_CCAG9200.b3_CAYC_CAYF_CCAG	109
20160901_Still2_0802M01H_01.RCC	0802M01H	2015-08-02	High	M	Target	1748_1_CAYC_CAYF_CCAG	2613
20160901_Still2_0802M01H_01.RCC	0802M01H	2015-08-02	High	M	Target	178_9_CAYC_CAYF_CCAG	7166
20160901_Still2_0802M01H_01.RCC	0802M01H	2015-08-02	High	M	Target	1837_1_CAYC_CAYF_CCAG	1944
20160901_Still2_0802M01H_01.RCC	0802M01H	2015-08-02	High	M	Target	2202_1_CAYC_CAYF_CCAG	2273
20160901_Still2_0802M01H_01.RCC	0802M01H	2015-08-02	High	M	Target	2758_1_CAYC_CAYF_CCAG	2064
20160901_Still2_0802M01H_01.RCC	0802M01H	2015-08-02	High	M	Target	3280_1_CAYC_CAYF_CCAG	16
20160901_Still2_0802M01H_01.RCC	0802M01H	2015-08-02	High	M	Target	3280_2_CAYC_CAYF_CCAG	23
20160901_Still2_0802M01H_01.RCC	0802M01H	2015-08-02	High	M	Target	3397_1_CAYC_CAYF_CCAG	596
20160901_Still2_0802M01H_01.RCC	0802M01H	2015-08-02	High	M	Target	3924_1_CAYC_CAYF_CCAG	225
20160901_Still2_0802M01H_01.RCC	0802M01H	2015-08-02	High	M	Target	CCAG48604	34954
20160901_Still2_0802M01H_01.RCC	0802M01H	2015-08-02	High	M	Target	comp50435_c1_seq2	432
20160901_Still2_0802M01H_01.RCC	0802M01H	2015-08-02	High	M	Target	comp55113_c2_seq1	1958
20160901_Still2_0802M01H_01.RCC	0802M01H	2015-08-02	High	M	Target	comp55834_c0_seq3	22
20160901_Still2_0802M01H_01.RCC	0802M01H	2015-08-02	High	M	Target	comp55959_c0_seq1	839
20160901_Still2_0802M01H_01.RCC	0802M01H	2015-08-02	High	M	Target	comp56496_c0_seq4	6
20160901_Still2_0802M01H_01.RCC	0802M01H	2015-08-02	High	M	Target	comp56747_c2_seq2	558
20160901_Still2_0802M01H_01.RCC	0802M01H	2015-08-02	High	M	Target	comp57952_c3_seq2	13
20160901_Still2_0802M01H_01.RCC	0802M01H	2015-08-02	High	M	Target	comp59049_c0_seq1	5219
20160901_Still2_0802M01H_01.RCC	0802M01H	2015-08-02	High	M	Target	comp60397_c0_seq1	47
20160901_Still2_0802M01H_01.RCC	0802M01H	2015-08-02	High	M	Target	comp62130_c0_seq4	368
20160901_Still2_0802M01H_01.RCC	0802M01H	2015-08-02	High	M	Target	comp63155_c0_seq11	1440
20160901_Still2_0802M01H_01.RCC	0802M01H	2015-08-02	High	M	Target	comp64021_c3_seq1	1066
20160901_Still2_0802M01H_01.RCC	0802M01H	2015-08-02	High	M	Target	comp65435_c0_seq8	79
20160901_Still2_0802M01H_01.RCC	0802M01H	2015-08-02	High	M	Target	comp65993_c0_seq6	357
20160901_Still2_0802M02H_02.RCC	0802M02H	2015-08-02	High	M	Positive	POS_A	17065
20160901_Still2_0802M02H_02.RCC	0802M02H	2015-08-02	High	M	Positive	POS_B	4135
20160901_Still2_0802M02H_02.RCC	0802M02H	2015-08-02	High	M	Positive	POS_C	1107
20160901_Still2_0802M02H_02.RCC	0802M02H	2015-08-02	High	M	Positive	POS_D	358
20160901_Still2_0802M02H_02.RCC	0802M02H	2015-08-02	High	M	Positive	POS_E	66
20160901_Still2_0802M02H_02.RCC	0802M02H	2015-08-02	High	M	Positive	POS_F	51
20160901_Still2_0802M02H_02.RCC	0802M02H	2015-08-02	High	M	Negative	NEG_A	10
20160901_Still2_0802M02H_02.RCC	0802M02H	2015-08-02	High	M	Negative	NEG_B	6
20160901_Still2_0802M02H_02.RCC	0802M02H	2015-08-02	High	M	Negative	NEG_C	1
20160901_Still2_0802M02H_02.RCC	0802M02H	2015-08-02	High	M	Negative	NEG_D	4
20160901_Still2_0802M02H_02.RCC	0802M02H	2015-08-02	High	M	Negative	NEG_E	8
20160901_Still2_0802M02H_02.RCC	0802M02H	2015-08-02	High	M	Negative	NEG_F	10
20160901_Still2_0802M02H_02.RCC	0802M02H	2015-08-02	High	M	Negative	NEG_G	1
20160901_Still2_0802M02H_02.RCC	0802M02H	2015-08-02	High	M	Negative	NEG_H	2
20160901_Still2_0802M02H_02.RCC	0802M02H	2015-08-02	High	M	Housekeeping	15_8	12379
20160901_Still2_0802M02H_02.RCC	0802M02H	2015-08-02	High	M	Housekeeping	187_1_CAYC_CAYF_CCAG	4223
20160901_Still2_0802M02H_02.RCC	0802M02H	2015-08-02	High	M	Housekeeping	comp61175_c0_seq94	157
20160901_Still2_0802M02H_02.RCC	0802M02H	2015-08-02	High	M	Housekeeping	comp61968_c0_seq6	72
20160901_Still2_0802M02H_02.RCC	0802M02H	2015-08-02	High	M	Housekeeping	comp62062_c4_seq7	135
20160901_Still2_0802M02H_02.RCC	0802M02H	2015-08-02	High	M	Housekeeping	comp62406_c1_seq15	257
20160901_Still2_0802M02H_02.RCC	0802M02H	2015-08-02	High	M	Housekeeping	comp63344_c0_seq12	273
20160901_Still2_0802M02H_02.RCC	0802M02H	2015-08-02	High	M	Housekeeping	comp64151_c1_seq55	310
20160901_Still2_0802M02H_02.RCC	0802M02H	2015-08-02	High	M	Target	0_0_CCAG28737.b1_CAYC_CAYF_CCAG	293
20160901_Still2_0802M02H_02.RCC	0802M02H	2015-08-02	High	M	Target	1252_1_CAYC_CAYF_CCAG	165
20160901_Still2_0802M02H_02.RCC	0802M02H	2015-08-02	High	M	Target	13341_0_CCAG36642.b1_CAYC_CAYF_CCAG	97
20160901_Still2_0802M02H_02.RCC	0802M02H	2015-08-02	High	M	Target	14_5_CAYC_CAYF_CCAG	278
20160901_Still2_0802M02H_02.RCC	0802M02H	2015-08-02	High	M	Target	1432_1_CAYC_CAYF_CCAG	48
20160901_Still2_0802M02H_02.RCC	0802M02H	2015-08-02	High	M	Target	14392_1_CAYC_CAYF_CCAG	15
20160901_Still2_0802M02H_02.RCC	0802M02H	2015-08-02	High	M	Target	14490_0_CCAG5543.g1_CAYC_CAYF_CCAG	6
20160901_Still2_0802M02H_02.RCC	0802M02H	2015-08-02	High	M	Target	14756_0_CCAG9200.b3_CAYC_CAYF_CCAG	146
20160901_Still2_0802M02H_02.RCC	0802M02H	2015-08-02	High	M	Target	1748_1_CAYC_CAYF_CCAG	1675
20160901_Still2_0802M02H_02.RCC	0802M02H	2015-08-02	High	M	Target	178_9_CAYC_CAYF_CCAG	11267
20160901_Still2_0802M02H_02.RCC	0802M02H	2015-08-02	High	M	Target	1837_1_CAYC_CAYF_CCAG	1569
20160901_Still2_0802M02H_02.RCC	0802M02H	2015-08-02	High	M	Target	2202_1_CAYC_CAYF_CCAG	866
20160901_Still2_0802M02H_02.RCC	0802M02H	2015-08-02	High	M	Target	2758_1_CAYC_CAYF_CCAG	2514
20160901_Still2_0802M02H_02.RCC	0802M02H	2015-08-02	High	M	Target	3280_1_CAYC_CAYF_CCAG	5
20160901_Still2_0802M02H_02.RCC	0802M02H	2015-08-02	High	M	Target	3280_2_CAYC_CAYF_CCAG	4
20160901_Still2_0802M02H_02.RCC	0802M02H	2015-08-02	High	M	Target	3397_1_CAYC_CAYF_CCAG	382
20160901_Still2_0802M02H_02.RCC	0802M02H	2015-08-02	High	M	Target	3924_1_CAYC_CAYF_CCAG	315
20160901_Still2_0802M02H_02.RCC	0802M02H	2015-08-02	High	M	Target	CCAG48604	21988
20160901_Still2_0802M02H_02.RCC	0802M02H	2015-08-02	High	M	Target	comp50435_c1_seq2	8
20160901_Still2_0802M02H_02.RCC	0802M02H	2015-08-02	High	M	Target	comp55113_c2_seq1	681
20160901_Still2_0802M02H_02.RCC	0802M02H	2015-08-02	High	M	Target	comp55834_c0_seq3	2
20160901_Still2_0802M02H_02.RCC	0802M02H	2015-08-02	High	M	Target	comp55959_c0_seq1	2331
20160901_Still2_0802M02H_02.RCC	0802M02H	2015-08-02	High	M	Target	comp56496_c0_seq4	11
20160901_Still2_0802M02H_02.RCC	0802M02H	2015-08-02	High	M	Target	comp56747_c2_seq2	359
20160901_Still2_0802M02H_02.RCC	0802M02H	2015-08-02	High	M	Target	comp57952_c3_seq2	8
20160901_Still2_0802M02H_02.RCC	0802M02H	2015-08-02	High	M	Target	comp59049_c0_seq1	50
20160901_Still2_0802M02H_02.RCC	0802M02H	2015-08-02	High	M	Target	comp60397_c0_seq1	16
20160901_Still2_0802M02H_02.RCC	0802M02H	2015-08-02	High	M	Target	comp62130_c0_seq4	883
20160901_Still2_0802M02H_02.RCC	0802M02H	2015-08-02	High	M	Target	comp63155_c0_seq11	1386
20160901_Still2_0802M02H_02.RCC	0802M02H	2015-08-02	High	M	Target	comp64021_c3_seq1	953
20160901_Still2_0802M02H_02.RCC	0802M02H	2015-08-02	High	M	Target	comp65435_c0_seq8	74
20160901_Still2_0802M02H_02.RCC	0802M02H	2015-08-02	High	M	Target	comp65993_c0_seq6	269
20160901_Still2_0802M03H_03.RCC	0802M03H	2015-08-02	High	M	Positive	POS_A	17806
20160901_Still2_0802M03H_03.RCC	0802M03H	2015-08-02	High	M	Positive	POS_B	4416
20160901_Still2_0802M03H_03.RCC	0802M03H	2015-08-02	High	M	Positive	POS_C	1203
20160901_Still2_0802M03H_03.RCC	0802M03H	2015-08-02	High	M	Positive	POS_D	362
20160901_Still2_0802M03H_03.RCC	0802M03H	2015-08-02	High	M	Positive	POS_E	70
20160901_Still2_0802M03H_03.RCC	0802M03H	2015-08-02	High	M	Positive	POS_F	36
20160901_Still2_0802M03H_03.RCC	0802M03H	2015-08-02	High	M	Negative	NEG_A	16
20160901_Still2_0802M03H_03.RCC	0802M03H	2015-08-02	High	M	Negative	NEG_B	16
20160901_Still2_0802M03H_03.RCC	0802M03H	2015-08-02	High	M	Negative	NEG_C	3
20160901_Still2_0802M03H_03.RCC	0802M03H	2015-08-02	High	M	Negative	NEG_D	2
20160901_Still2_0802M03H_03.RCC	0802M03H	2015-08-02	High	M	Negative	NEG_E	20
20160901_Still2_0802M03H_03.RCC	0802M03H	2015-08-02	High	M	Negative	NEG_F	29
20160901_Still2_0802M03H_03.RCC	0802M03H	2015-08-02	High	M	Negative	NEG_G	1
20160901_Still2_0802M03H_03.RCC	0802M03H	2015-08-02	High	M	Negative	NEG_H	2
20160901_Still2_0802M03H_03.RCC	0802M03H	2015-08-02	High	M	Housekeeping	15_8	61583
20160901_Still2_0802M03H_03.RCC	0802M03H	2015-08-02	High	M	Housekeeping	187_1_CAYC_CAYF_CCAG	7156
20160901_Still2_0802M03H_03.RCC	0802M03H	2015-08-02	High	M	Housekeeping	comp61175_c0_seq94	366
20160901_Still2_0802M03H_03.RCC	0802M03H	2015-08-02	High	M	Housekeeping	comp61968_c0_seq6	232
20160901_Still2_0802M03H_03.RCC	0802M03H	2015-08-02	High	M	Housekeeping	comp62062_c4_seq7	385
20160901_Still2_0802M03H_03.RCC	0802M03H	2015-08-02	High	M	Housekeeping	comp62406_c1_seq15	551
20160901_Still2_0802M03H_03.RCC	0802M03H	2015-08-02	High	M	Housekeeping	comp63344_c0_seq12	607
20160901_Still2_0802M03H_03.RCC	0802M03H	2015-08-02	High	M	Housekeeping	comp64151_c1_seq55	996
20160901_Still2_0802M03H_03.RCC	0802M03H	2015-08-02	High	M	Target	0_0_CCAG28737.b1_CAYC_CAYF_CCAG	893
20160901_Still2_0802M03H_03.RCC	0802M03H	2015-08-02	High	M	Target	1252_1_CAYC_CAYF_CCAG	1391
20160901_Still2_0802M03H_03.RCC	0802M03H	2015-08-02	High	M	Target	13341_0_CCAG36642.b1_CAYC_CAYF_CCAG	291
20160901_Still2_0802M03H_03.RCC	0802M03H	2015-08-02	High	M	Target	14_5_CAYC_CAYF_CCAG	710
20160901_Still2_0802M03H_03.RCC	0802M03H	2015-08-02	High	M	Target	1432_1_CAYC_CAYF_CCAG	308
20160901_Still2_0802M03H_03.RCC	0802M03H	2015-08-02	High	M	Target	14392_1_CAYC_CAYF_CCAG	24021
20160901_Still2_0802M03H_03.RCC	0802M03H	2015-08-02	High	M	Target	14490_0_CCAG5543.g1_CAYC_CAYF_CCAG	44
20160901_Still2_0802M03H_03.RCC	0802M03H	2015-08-02	High	M	Target	14756_0_CCAG9200.b3_CAYC_CAYF_CCAG	1
20160901_Still2_0802M03H_03.RCC	0802M03H	2015-08-02	High	M	Target	1748_1_CAYC_CAYF_CCAG	3553
20160901_Still2_0802M03H_03.RCC	0802M03H	2015-08-02	High	M	Target	178_9_CAYC_CAYF_CCAG	15892
20160901_Still2_0802M03H_03.RCC	0802M03H	2015-08-02	High	M	Target	1837_1_CAYC_CAYF_CCAG	6358
20160901_Still2_0802M03H_03.RCC	0802M03H	2015-08-02	High	M	Target	2202_1_CAYC_CAYF_CCAG	5968
20160901_Still2_0802M03H_03.RCC	0802M03H	2015-08-02	High	M	Target	2758_1_CAYC_CAYF_CCAG	4771
20160901_Still2_0802M03H_03.RCC	0802M03H	2015-08-02	High	M	Target	3280_1_CAYC_CAYF_CCAG	2057
20160901_Still2_0802M03H_03.RCC	0802M03H	2015-08-02	High	M	Target	3280_2_CAYC_CAYF_CCAG	2081
20160901_Still2_0802M03H_03.RCC	0802M03H	2015-08-02	High	M	Target	3397_1_CAYC_CAYF_CCAG	949
20160901_Still2_0802M03H_03.RCC	0802M03H	2015-08-02	High	M	Target	3924_1_CAYC_CAYF_CCAG	35
20160901_Still2_0802M03H_03.RCC	0802M03H	2015-08-02	High	M	Target	CCAG48604	79305
20160901_Still2_0802M03H_03.RCC	0802M03H	2015-08-02	High	M	Target	comp50435_c1_seq2	189
20160901_Still2_0802M03H_03.RCC	0802M03H	2015-08-02	High	M	Target	comp55113_c2_seq1	2803
20160901_Still2_0802M03H_03.RCC	0802M03H	2015-08-02	High	M	Target	comp55834_c0_seq3	66
20160901_Still2_0802M03H_03.RCC	0802M03H	2015-08-02	High	M	Target	comp55959_c0_seq1	2709
20160901_Still2_0802M03H_03.RCC	0802M03H	2015-08-02	High	M	Target	comp56496_c0_seq4	17
20160901_Still2_0802M03H_03.RCC	0802M03H	2015-08-02	High	M	Target	comp56747_c2_seq2	1068
20160901_Still2_0802M03H_03.RCC	0802M03H	2015-08-02	High	M	Target	comp57952_c3_seq2	25
20160901_Still2_0802M03H_03.RCC	0802M03H	2015-08-02	High	M	Target	comp59049_c0_seq1	13793
20160901_Still2_0802M03H_03.RCC	0802M03H	2015-08-02	High	M	Target	comp60397_c0_seq1	50
20160901_Still2_0802M03H_03.RCC	0802M03H	2015-08-02	High	M	Target	comp62130_c0_seq4	997
20160901_Still2_0802M03H_03.RCC	0802M03H	2015-08-02	High	M	Target	comp63155_c0_seq11	2126
20160901_Still2_0802M03H_03.RCC	0802M03H	2015-08-02	High	M	Target	comp64021_c3_seq1	1976
20160901_Still2_0802M03H_03.RCC	0802M03H	2015-08-02	High	M	Target	comp65435_c0_seq8	225
20160901_Still2_0802M03H_03.RCC	0802M03H	2015-08-02	High	M	Target	comp65993_c0_seq6	598
20160901_Still2_0802M04H_04.RCC	0802M04H	2015-08-02	High	M	Positive	POS_A	20200
20160901_Still2_0802M04H_04.RCC	0802M04H	2015-08-02	High	M	Positive	POS_B	4909
20160901_Still2_0802M04H_04.RCC	0802M04H	2015-08-02	High	M	Positive	POS_C	1403
20160901_Still2_0802M04H_04.RCC	0802M04H	2015-08-02	High	M	Positive	POS_D	381
20160901_Still2_0802M04H_04.RCC	0802M04H	2015-08-02	High	M	Positive	POS_E	82
20160901_Still2_0802M04H_04.RCC	0802M04H	2015-08-02	High	M	Positive	POS_F	58
20160901_Still2_0802M04H_04.RCC	0802M04H	2015-08-02	High	M	Negative	NEG_A	8
20160901_Still2_0802M04H_04.RCC	0802M04H	2015-08-02	High	M	Negative	NEG_B	5
20160901_Still2_0802M04H_04.RCC	0802M04H	2015-08-02	High	M	Negative	NEG_C	1
20160901_Still2_0802M04H_04.RCC	0802M04H	2015-08-02	High	M	Negative	NEG_D	3
20160901_Still2_0802M04H_04.RCC	0802M04H	2015-08-02	High	M	Negative	NEG_E	12
20160901_Still2_0802M04H_04.RCC	0802M04H	2015-08-02	High	M	Negative	NEG_F	20
20160901_Still2_0802M04H_04.RCC	0802M04H	2015-08-02	High	M	Negative	NEG_G	2
20160901_Still2_0802M04H_04.RCC	0802M04H	2015-08-02	High	M	Negative	NEG_H	2
20160901_Still2_0802M04H_04.RCC	0802M04H	2015-08-02	High	M	Housekeeping	15_8	55092
20160901_Still2_0802M04H_04.RCC	0802M04H	2015-08-02	High	M	Housekeeping	187_1_CAYC_CAYF_CCAG	3356
20160901_Still2_0802M04H_04.RCC	0802M04H	2015-08-02	High	M	Housekeeping	comp61175_c0_seq94	188
20160901_Still2_0802M04H_04.RCC	0802M04H	2015-08-02	High	M	Housekeeping	comp61968_c0_seq6	114
20160901_Still2_0802M04H_04.RCC	0802M04H	2015-08-02	High	M	Housekeeping	comp62062_c4_seq7	131
20160901_Still2_0802M04H_04.RCC	0802M04H	2015-08-02	High	M	Housekeeping	comp62406_c1_seq15	209
20160901_Still2_0802M04H_04.RCC	0802M04H	2015-08-02	High	M	Housekeeping	comp63344_c0_seq12	252
20160901_Still2_0802M04H_04.RCC	0802M04H	2015-08-02	High	M	Housekeeping	comp64151_c1_seq55	557
20160901_Still2_0802M04H_04.RCC	0802M04H	2015-08-02	High	M	Target	0_0_CCAG28737.b1_CAYC_CAYF_CCAG	492
20160901_Still2_0802M04H_04.RCC	0802M04H	2015-08-02	High	M	Target	1252_1_CAYC_CAYF_CCAG	427
20160901_Still2_0802M04H_04.RCC	0802M04H	2015-08-02	High	M	Target	13341_0_CCAG36642.b1_CAYC_CAYF_CCAG	164
20160901_Still2_0802M04H_04.RCC	0802M04H	2015-08-02	High	M	Target	14_5_CAYC_CAYF_CCAG	17
20160901_Still2_0802M04H_04.RCC	0802M04H	2015-08-02	High	M	Target	1432_1_CAYC_CAYF_CCAG	108
20160901_Still2_0802M04H_04.RCC	0802M04H	2015-08-02	High	M	Target	14392_1_CAYC_CAYF_CCAG	49
20160901_Still2_0802M04H_04.RCC	0802M04H	2015-08-02	High	M	Target	14490_0_CCAG5543.g1_CAYC_CAYF_CCAG	41
20160901_Still2_0802M04H_04.RCC	0802M04H	2015-08-02	High	M	Target	14756_0_CCAG9200.b3_CAYC_CAYF_CCAG	75
20160901_Still2_0802M04H_04.RCC	0802M04H	2015-08-02	High	M	Target	1748_1_CAYC_CAYF_CCAG	3644
20160901_Still2_0802M04H_04.RCC	0802M04H	2015-08-02	High	M	Target	178_9_CAYC_CAYF_CCAG	7520
20160901_Still2_0802M04H_04.RCC	0802M04H	2015-08-02	High	M	Target	1837_1_CAYC_CAYF_CCAG	2711
20160901_Still2_0802M04H_04.RCC	0802M04H	2015-08-02	High	M	Target	2202_1_CAYC_CAYF_CCAG	2943
20160901_Still2_0802M04H_04.RCC	0802M04H	2015-08-02	High	M	Target	2758_1_CAYC_CAYF_CCAG	3515
20160901_Still2_0802M04H_04.RCC	0802M04H	2015-08-02	High	M	Target	3280_1_CAYC_CAYF_CCAG	6
20160901_Still2_0802M04H_04.RCC	0802M04H	2015-08-02	High	M	Target	3280_2_CAYC_CAYF_CCAG	16
20160901_Still2_0802M04H_04.RCC	0802M04H	2015-08-02	High	M	Target	3397_1_CAYC_CAYF_CCAG	594
20160901_Still2_0802M04H_04.RCC	0802M04H	2015-08-02	High	M	Target	3924_1_CAYC_CAYF_CCAG	159
20160901_Still2_0802M04H_04.RCC	0802M04H	2015-08-02	High	M	Target	CCAG48604	69311
20160901_Still2_0802M04H_04.RCC	0802M04H	2015-08-02	High	M	Target	comp50435_c1_seq2	203
20160901_Still2_0802M04H_04.RCC	0802M04H	2015-08-02	High	M	Target	comp55113_c2_seq1	2661
20160901_Still2_0802M04H_04.RCC	0802M04H	2015-08-02	High	M	Target	comp55834_c0_seq3	23
20160901_Still2_0802M04H_04.RCC	0802M04H	2015-08-02	High	M	Target	comp55959_c0_seq1	1704
20160901_Still2_0802M04H_04.RCC	0802M04H	2015-08-02	High	M	Target	comp56496_c0_seq4	18
20160901_Still2_0802M04H_04.RCC	0802M04H	2015-08-02	High	M	Target	comp56747_c2_seq2	516
20160901_Still2_0802M04H_04.RCC	0802M04H	2015-08-02	High	M	Target	comp57952_c3_seq2	21
20160901_Still2_0802M04H_04.RCC	0802M04H	2015-08-02	High	M	Target	comp59049_c0_seq1	7405
20160901_Still2_0802M04H_04.RCC	0802M04H	2015-08-02	High	M	Target	comp60397_c0_seq1	27
20160901_Still2_0802M04H_04.RCC	0802M04H	2015-08-02	High	M	Target	comp62130_c0_seq4	776
20160901_Still2_0802M04H_04.RCC	0802M04H	2015-08-02	High	M	Target	comp63155_c0_seq11	1306
20160901_Still2_0802M04H_04.RCC	0802M04H	2015-08-02	High	M	Target	comp64021_c3_seq1	1274
20160901_Still2_0802M04H_04.RCC	0802M04H	2015-08-02	High	M	Target	comp65435_c0_seq8	86
20160901_Still2_0802M04H_04.RCC	0802M04H	2015-08-02	High	M	Target	comp65993_c0_seq6	368
20160901_Still2_0802M05H_05.RCC	0802M05H	2015-08-02	High	M	Positive	POS_A	20123
20160901_Still2_0802M05H_05.RCC	0802M05H	2015-08-02	High	M	Positive	POS_B	4970
20160901_Still2_0802M05H_05.RCC	0802M05H	2015-08-02	High	M	Positive	POS_C	1340
20160901_Still2_0802M05H_05.RCC	0802M05H	2015-08-02	High	M	Positive	POS_D	390
20160901_Still2_0802M05H_05.RCC	0802M05H	2015-08-02	High	M	Positive	POS_E	56
20160901_Still2_0802M05H_05.RCC	0802M05H	2015-08-02	High	M	Positive	POS_F	51
20160901_Still2_0802M05H_05.RCC	0802M05H	2015-08-02	High	M	Negative	NEG_A	9
20160901_Still2_0802M05H_05.RCC	0802M05H	2015-08-02	High	M	Negative	NEG_B	7
20160901_Still2_0802M05H_05.RCC	0802M05H	2015-08-02	High	M	Negative	NEG_C	1
20160901_Still2_0802M05H_05.RCC	0802M05H	2015-08-02	High	M	Negative	NEG_D	3
20160901_Still2_0802M05H_05.RCC	0802M05H	2015-08-02	High	M	Negative	NEG_E	15
20160901_Still2_0802M05H_05.RCC	0802M05H	2015-08-02	High	M	Negative	NEG_F	20
20160901_Still2_0802M05H_05.RCC	0802M05H	2015-08-02	High	M	Negative	NEG_G	2
20160901_Still2_0802M05H_05.RCC	0802M05H	2015-08-02	High	M	Negative	NEG_H	2
20160901_Still2_0802M05H_05.RCC	0802M05H	2015-08-02	High	M	Housekeeping	15_8	32251
20160901_Still2_0802M05H_05.RCC	0802M05H	2015-08-02	High	M	Housekeeping	187_1_CAYC_CAYF_CCAG	2021
20160901_Still2_0802M05H_05.RCC	0802M05H	2015-08-02	High	M	Housekeeping	comp61175_c0_seq94	98
20160901_Still2_0802M05H_05.RCC	0802M05H	2015-08-02	High	M	Housekeeping	comp61968_c0_seq6	42
20160901_Still2_0802M05H_05.RCC	0802M05H	2015-08-02	High	M	Housekeeping	comp62062_c4_seq7	82
20160901_Still2_0802M05H_05.RCC	0802M05H	2015-08-02	High	M	Housekeeping	comp62406_c1_seq15	133
20160901_Still2_0802M05H_05.RCC	0802M05H	2015-08-02	High	M	Housekeeping	comp63344_c0_seq12	197
20160901_Still2_0802M05H_05.RCC	0802M05H	2015-08-02	High	M	Housekeeping	comp64151_c1_seq55	280
20160901_Still2_0802M05H_05.RCC	0802M05H	2015-08-02	High	M	Target	0_0_CCAG28737.b1_CAYC_CAYF_CCAG	282
20160901_Still2_0802M05H_05.RCC	0802M05H	2015-08-02	High	M	Target	1252_1_CAYC_CAYF_CCAG	230
20160901_Still2_0802M05H_05.RCC	0802M05H	2015-08-02	High	M	Target	13341_0_CCAG36642.b1_CAYC_CAYF_CCAG	85
20160901_Still2_0802M05H_05.RCC	0802M05H	2015-08-02	High	M	Target	14_5_CAYC_CAYF_CCAG	327
20160901_Still2_0802M05H_05.RCC	0802M05H	2015-08-02	High	M	Target	1432_1_CAYC_CAYF_CCAG	35
20160901_Still2_0802M05H_05.RCC	0802M05H	2015-08-02	High	M	Target	14392_1_CAYC_CAYF_CCAG	38
20160901_Still2_0802M05H_05.RCC	0802M05H	2015-08-02	High	M	Target	14490_0_CCAG5543.g1_CAYC_CAYF_CCAG	22
20160901_Still2_0802M05H_05.RCC	0802M05H	2015-08-02	High	M	Target	14756_0_CCAG9200.b3_CAYC_CAYF_CCAG	62
20160901_Still2_0802M05H_05.RCC	0802M05H	2015-08-02	High	M	Target	1748_1_CAYC_CAYF_CCAG	1785
20160901_Still2_0802M05H_05.RCC	0802M05H	2015-08-02	High	M	Target	178_9_CAYC_CAYF_CCAG	3448
20160901_Still2_0802M05H_05.RCC	0802M05H	2015-08-02	High	M	Target	1837_1_CAYC_CAYF_CCAG	1365
20160901_Still2_0802M05H_05.RCC	0802M05H	2015-08-02	High	M	Target	2202_1_CAYC_CAYF_CCAG	1733
20160901_Still2_0802M05H_05.RCC	0802M05H	2015-08-02	High	M	Target	2758_1_CAYC_CAYF_CCAG	1764
20160901_Still2_0802M05H_05.RCC	0802M05H	2015-08-02	High	M	Target	3280_1_CAYC_CAYF_CCAG	8
20160901_Still2_0802M05H_05.RCC	0802M05H	2015-08-02	High	M	Target	3280_2_CAYC_CAYF_CCAG	4
20160901_Still2_0802M05H_05.RCC	0802M05H	2015-08-02	High	M	Target	3397_1_CAYC_CAYF_CCAG	356
20160901_Still2_0802M05H_05.RCC	0802M05H	2015-08-02	High	M	Target	3924_1_CAYC_CAYF_CCAG	165
20160901_Still2_0802M05H_05.RCC	0802M05H	2015-08-02	High	M	Target	CCAG48604	27554
20160901_Still2_0802M05H_05.RCC	0802M05H	2015-08-02	High	M	Target	comp50435_c1_seq2	52
20160901_Still2_0802M05H_05.RCC	0802M05H	2015-08-02	High	M	Target	comp55113_c2_seq1	867
20160901_Still2_0802M05H_05.RCC	0802M05H	2015-08-02	High	M	Target	comp55834_c0_seq3	10
20160901_Still2_0802M05H_05.RCC	0802M05H	2015-08-02	High	M	Target	comp55959_c0_seq1	889
20160901_Still2_0802M05H_05.RCC	0802M05H	2015-08-02	High	M	Target	comp56496_c0_seq4	5
20160901_Still2_0802M05H_05.RCC	0802M05H	2015-08-02	High	M	Target	comp56747_c2_seq2	256
20160901_Still2_0802M05H_05.RCC	0802M05H	2015-08-02	High	M	Target	comp57952_c3_seq2	3
20160901_Still2_0802M05H_05.RCC	0802M05H	2015-08-02	High	M	Target	comp59049_c0_seq1	3849
20160901_Still2_0802M05H_05.RCC	0802M05H	2015-08-02	High	M	Target	comp60397_c0_seq1	17
20160901_Still2_0802M05H_05.RCC	0802M05H	2015-08-02	High	M	Target	comp62130_c0_seq4	350
20160901_Still2_0802M05H_05.RCC	0802M05H	2015-08-02	High	M	Target	comp63155_c0_seq11	733
20160901_Still2_0802M05H_05.RCC	0802M05H	2015-08-02	High	M	Target	comp64021_c3_seq1	609
20160901_Still2_0802M05H_05.RCC	0802M05H	2015-08-02	High	M	Target	comp65435_c0_seq8	45
20160901_Still2_0802M05H_05.RCC	0802M05H	2015-08-02	High	M	Target	comp65993_c0_seq6	223
20160901_Still2_1222F02H_11.RCC	1222F02H	2015-12-22	High	F	Positive	POS_A	7214
20160901_Still2_1222F02H_11.RCC	1222F02H	2015-12-22	High	F	Positive	POS_B	2180
20160901_Still2_1222F02H_11.RCC	1222F02H	2015-12-22	High	F	Positive	POS_C	575
20160901_Still2_1222F02H_11.RCC	1222F02H	2015-12-22	High	F	Positive	POS_D	220
20160901_Still2_1222F02H_11.RCC	1222F02H	2015-12-22	High	F	Positive	POS_E	37
20160901_Still2_1222F02H_11.RCC	1222F02H	2015-12-22	High	F	Positive	POS_F	20
20160901_Still2_1222F02H_11.RCC	1222F02H	2015-12-22	High	F	Negative	NEG_A	8
20160901_Still2_1222F02H_11.RCC	1222F02H	2015-12-22	High	F	Negative	NEG_B	16
20160901_Still2_1222F02H_11.RCC	1222F02H	2015-12-22	High	F	Negative	NEG_C	1
20160901_Still2_1222F02H_11.RCC	1222F02H	2015-12-22	High	F	Negative	NEG_D	1
20160901_Still2_1222F02H_11.RCC	1222F02H	2015-12-22	High	F	Negative	NEG_E	13
20160901_Still2_1222F02H_11.RCC	1222F02H	2015-12-22	High	F	Negative	NEG_F	39
20160901_Still2_1222F02H_11.RCC	1222F02H	2015-12-22	High	F	Negative	NEG_G	36
20160901_Still2_1222F02H_11.RCC	1222F02H	2015-12-22	High	F	Negative	NEG_H	33
20160901_Still2_1222F02H_11.RCC	1222F02H	2015-12-22	High	F	Housekeeping	15_8	46081
20160901_Still2_1222F02H_11.RCC	1222F02H	2015-12-22	High	F	Housekeeping	187_1_CAYC_CAYF_CCAG	8198
20160901_Still2_1222F02H_11.RCC	1222F02H	2015-12-22	High	F	Housekeeping	comp61175_c0_seq94	661
20160901_Still2_1222F02H_11.RCC	1222F02H	2015-12-22	High	F	Housekeeping	comp61968_c0_seq6	342
20160901_Still2_1222F02H_11.RCC	1222F02H	2015-12-22	High	F	Housekeeping	comp62062_c4_seq7	719
20160901_Still2_1222F02H_11.RCC	1222F02H	2015-12-22	High	F	Housekeeping	comp62406_c1_seq15	780
20160901_Still2_1222F02H_11.RCC	1222F02H	2015-12-22	High	F	Housekeeping	comp63344_c0_seq12	1083
20160901_Still2_1222F02H_11.RCC	1222F02H	2015-12-22	High	F	Housekeeping	comp64151_c1_seq55	774
20160901_Still2_1222F02H_11.RCC	1222F02H	2015-12-22	High	F	Target	0_0_CCAG28737.b1_CAYC_CAYF_CCAG	764
20160901_Still2_1222F02H_11.RCC	1222F02H	2015-12-22	High	F	Target	1252_1_CAYC_CAYF_CCAG	3454
20160901_Still2_1222F02H_11.RCC	1222F02H	2015-12-22	High	F	Target	13341_0_CCAG36642.b1_CAYC_CAYF_CCAG	334
20160901_Still2_1222F02H_11.RCC	1222F02H	2015-12-22	High	F	Target	14_5_CAYC_CAYF_CCAG	655
20160901_Still2_1222F02H_11.RCC	1222F02H	2015-12-22	High	F	Target	1432_1_CAYC_CAYF_CCAG	526
20160901_Still2_1222F02H_11.RCC	1222F02H	2015-12-22	High	F	Target	14392_1_CAYC_CAYF_CCAG	59381
20160901_Still2_1222F02H_11.RCC	1222F02H	2015-12-22	High	F	Target	14490_0_CCAG5543.g1_CAYC_CAYF_CCAG	131
20160901_Still2_1222F02H_11.RCC	1222F02H	2015-12-22	High	F	Target	14756_0_CCAG9200.b3_CAYC_CAYF_CCAG	2
20160901_Still2_1222F02H_11.RCC	1222F02H	2015-12-22	High	F	Target	1748_1_CAYC_CAYF_CCAG	4201
20160901_Still2_1222F02H_11.RCC	1222F02H	2015-12-22	High	F	Target	178_9_CAYC_CAYF_CCAG	35709
20160901_Still2_1222F02H_11.RCC	1222F02H	2015-12-22	High	F	Target	1837_1_CAYC_CAYF_CCAG	6845
20160901_Still2_1222F02H_11.RCC	1222F02H	2015-12-22	High	F	Target	2202_1_CAYC_CAYF_CCAG	4977
20160901_Still2_1222F02H_11.RCC	1222F02H	2015-12-22	High	F	Target	2758_1_CAYC_CAYF_CCAG	9390
20160901_Still2_1222F02H_11.RCC	1222F02H	2015-12-22	High	F	Target	3280_1_CAYC_CAYF_CCAG	355695
20160901_Still2_1222F02H_11.RCC	1222F02H	2015-12-22	High	F	Target	3280_2_CAYC_CAYF_CCAG	386626
20160901_Still2_1222F02H_11.RCC	1222F02H	2015-12-22	High	F	Target	3397_1_CAYC_CAYF_CCAG	1201
20160901_Still2_1222F02H_11.RCC	1222F02H	2015-12-22	High	F	Target	3924_1_CAYC_CAYF_CCAG	58
20160901_Still2_1222F02H_11.RCC	1222F02H	2015-12-22	High	F	Target	CCAG48604	104324
20160901_Still2_1222F02H_11.RCC	1222F02H	2015-12-22	High	F	Target	comp50435_c1_seq2	114
20160901_Still2_1222F02H_11.RCC	1222F02H	2015-12-22	High	F	Target	comp55113_c2_seq1	1896
20160901_Still2_1222F02H_11.RCC	1222F02H	2015-12-22	High	F	Target	comp55834_c0_seq3	231
20160901_Still2_1222F02H_11.RCC	1222F02H	2015-12-22	High	F	Target	comp55959_c0_seq1	4545
20160901_Still2_1222F02H_11.RCC	1222F02H	2015-12-22	High	F	Target	comp56496_c0_seq4	36
20160901_Still2_1222F02H_11.RCC	1222F02H	2015-12-22	High	F	Target	comp56747_c2_seq2	1470
20160901_Still2_1222F02H_11.RCC	1222F02H	2015-12-22	High	F	Target	comp57952_c3_seq2	40
20160901_Still2_1222F02H_11.RCC	1222F02H	2015-12-22	High	F	Target	comp59049_c0_seq1	853
20160901_Still2_1222F02H_11.RCC	1222F02H	2015-12-22	High	F	Target	comp60397_c0_seq1	59
20160901_Still2_1222F02H_11.RCC	1222F02H	2015-12-22	High	F	Target	comp62130_c0_seq4	1698
20160901_Still2_1222F02H_11.RCC	1222F02H	2015-12-22	High	F	Target	comp63155_c0_seq11	3534
20160901_Still2_1222F02H_11.RCC	1222F02H	2015-12-22	High	F	Target	comp64021_c3_seq1	3250
20160901_Still2_1222F02H_11.RCC	1222F02H	2015-12-22	High	F	Target	comp65435_c0_seq8	343
20160901_Still2_1222F02H_11.RCC	1222F02H	2015-12-22	High	F	Target	comp65993_c0_seq6	819
20160901_Still2_1222F02L_12.RCC	1222F02L	2015-12-22	Low	F	Positive	POS_A	11439
20160901_Still2_1222F02L_12.RCC	1222F02L	2015-12-22	Low	F	Positive	POS_B	3183
20160901_Still2_1222F02L_12.RCC	1222F02L	2015-12-22	Low	F	Positive	POS_C	939
20160901_Still2_1222F02L_12.RCC	1222F02L	2015-12-22	Low	F	Positive	POS_D	256
20160901_Still2_1222F02L_12.RCC	1222F02L	2015-12-22	Low	F	Positive	POS_E	71
20160901_Still2_1222F02L_12.RCC	1222F02L	2015-12-22	Low	F	Positive	POS_F	37
20160901_Still2_1222F02L_12.RCC	1222F02L	2015-12-22	Low	F	Negative	NEG_A	9
20160901_Still2_1222F02L_12.RCC	1222F02L	2015-12-22	Low	F	Negative	NEG_B	30
20160901_Still2_1222F02L_12.RCC	1222F02L	2015-12-22	Low	F	Negative	NEG_C	6
20160901_Still2_1222F02L_12.RCC	1222F02L	2015-12-22	Low	F	Negative	NEG_D	3
20160901_Still2_1222F02L_12.RCC	1222F02L	2015-12-22	Low	F	Negative	NEG_E	14
20160901_Still2_1222F02L_12.RCC	1222F02L	2015-12-22	Low	F	Negative	NEG_F	52
20160901_Still2_1222F02L_12.RCC	1222F02L	2015-12-22	Low	F	Negative	NEG_G	7
20160901_Still2_1222F02L_12.RCC	1222F02L	2015-12-22	Low	F	Negative	NEG_H	10
20160901_Still2_1222F02L_12.RCC	1222F02L	2015-12-22	Low	F	Housekeeping	15_8	54724
20160901_Still2_1222F02L_12.RCC	1222F02L	2015-12-22	Low	F	Housekeeping	187_1_CAYC_CAYF_CCAG	12616
20160901_Still2_1222F02L_12.RCC	1222F02L	2015-12-22	Low	F	Housekeeping	comp61175_c0_seq94	858
20160901_Still2_1222F02L_12.RCC	1222F02L	2015-12-22	Low	F	Housekeeping	comp61968_c0_seq6	525
20160901_Still2_1222F02L_12.RCC	1222F02L	2015-12-22	Low	F	Housekeeping	comp62062_c4_seq7	1043
20160901_Still2_1222F02L_12.RCC	1222F02L	2015-12-22	Low	F	Housekeeping	comp62406_c1_seq15	1048
20160901_Still2_1222F02L_12.RCC	1222F02L	2015-12-22	Low	F	Housekeeping	comp63344_c0_seq12	1831
20160901_Still2_1222F02L_12.RCC	1222F02L	2015-12-22	Low	F	Housekeeping	comp64151_c1_seq55	1296
20160901_Still2_1222F02L_12.RCC	1222F02L	2015-12-22	Low	F	Target	0_0_CCAG28737.b1_CAYC_CAYF_CCAG	945
20160901_Still2_1222F02L_12.RCC	1222F02L	2015-12-22	Low	F	Target	1252_1_CAYC_CAYF_CCAG	2225
20160901_Still2_1222F02L_12.RCC	1222F02L	2015-12-22	Low	F	Target	13341_0_CCAG36642.b1_CAYC_CAYF_CCAG	573
20160901_Still2_1222F02L_12.RCC	1222F02L	2015-12-22	Low	F	Target	14_5_CAYC_CAYF_CCAG	396
20160901_Still2_1222F02L_12.RCC	1222F02L	2015-12-22	Low	F	Target	1432_1_CAYC_CAYF_CCAG	687
20160901_Still2_1222F02L_12.RCC	1222F02L	2015-12-22	Low	F	Target	14392_1_CAYC_CAYF_CCAG	54551
20160901_Still2_1222F02L_12.RCC	1222F02L	2015-12-22	Low	F	Target	14490_0_CCAG5543.g1_CAYC_CAYF_CCAG	35
20160901_Still2_1222F02L_12.RCC	1222F02L	2015-12-22	Low	F	Target	14756_0_CCAG9200.b3_CAYC_CAYF_CCAG	3
20160901_Still2_1222F02L_12.RCC	1222F02L	2015-12-22	Low	F	Target	1748_1_CAYC_CAYF_CCAG	8187
20160901_Still2_1222F02L_12.RCC	1222F02L	2015-12-22	Low	F	Target	178_9_CAYC_CAYF_CCAG	56885
20160901_Still2_1222F02L_12.RCC	1222F02L	2015-12-22	Low	F	Target	1837_1_CAYC_CAYF_CCAG	15109
20160901_Still2_1222F02L_12.RCC	1222F02L	2015-12-22	Low	F	Target	2202_1_CAYC_CAYF_CCAG	7050
20160901_Still2_1222F02L_12.RCC	1222F02L	2015-12-22	Low	F	Target	2758_1_CAYC_CAYF_CCAG	14963
20160901_Still2_1222F02L_12.RCC	1222F02L	2015-12-22	Low	F	Target	3280_1_CAYC_CAYF_CCAG	31262
20160901_Still2_1222F02L_12.RCC	1222F02L	2015-12-22	Low	F	Target	3280_2_CAYC_CAYF_CCAG	30789
20160901_Still2_1222F02L_12.RCC	1222F02L	2015-12-22	Low	F	Target	3397_1_CAYC_CAYF_CCAG	2155
20160901_Still2_1222F02L_12.RCC	1222F02L	2015-12-22	Low	F	Target	3924_1_CAYC_CAYF_CCAG	80
20160901_Still2_1222F02L_12.RCC	1222F02L	2015-12-22	Low	F	Target	CCAG48604	146823
20160901_Still2_1222F02L_12.RCC	1222F02L	2015-12-22	Low	F	Target	comp50435_c1_seq2	37
20160901_Still2_1222F02L_12.RCC	1222F02L	2015-12-22	Low	F	Target	comp55113_c2_seq1	1832
20160901_Still2_1222F02L_12.RCC	1222F02L	2015-12-22	Low	F	Target	comp55834_c0_seq3	47
20160901_Still2_1222F02L_12.RCC	1222F02L	2015-12-22	Low	F	Target	comp55959_c0_seq1	6307
20160901_Still2_1222F02L_12.RCC	1222F02L	2015-12-22	Low	F	Target	comp56496_c0_seq4	59
20160901_Still2_1222F02L_12.RCC	1222F02L	2015-12-22	Low	F	Target	comp56747_c2_seq2	2250
20160901_Still2_1222F02L_12.RCC	1222F02L	2015-12-22	Low	F	Target	comp57952_c3_seq2	39
20160901_Still2_1222F02L_12.RCC	1222F02L	2015-12-22	Low	F	Target	comp59049_c0_seq1	3043
20160901_Still2_1222F02L_12.RCC	1222F02L	2015-12-22	Low	F	Target	comp60397_c0_seq1	93
20160901_Still2_1222F02L_12.RCC	1222F02L	2015-12-22	Low	F	Target	comp62130_c0_seq4	2104
20160901_Still2_1222F02L_12.RCC	1222F02L	2015-12-22	Low	F	Target	comp63155_c0_seq11	4876
20160901_Still2_1222F02L_12.RCC	1222F02L	2015-12-22	Low	F	Target	comp64021_c3_seq1	3446
20160901_Still2_1222F02L_12.RCC	1222F02L	2015-12-22	Low	F	Target	comp65435_c0_seq8	443
20160901_Still2_1222F02L_12.RCC	1222F02L	2015-12-22	Low	F	Target	comp65993_c0_seq6	1011
20160901_Still3_0830F01H_06.RCC	0830F01H	2015-08-30	High	F	Positive	POS_A	15612
20160901_Still3_0830F01H_06.RCC	0830F01H	2015-08-30	High	F	Positive	POS_B	4217
20160901_Still3_0830F01H_06.RCC	0830F01H	2015-08-30	High	F	Positive	POS_C	1170
20160901_Still3_0830F01H_06.RCC	0830F01H	2015-08-30	High	F	Positive	POS_D	381
20160901_Still3_0830F01H_06.RCC	0830F01H	2015-08-30	High	F	Positive	POS_E	68
20160901_Still3_0830F01H_06.RCC	0830F01H	2015-08-30	High	F	Positive	POS_F	57
20160901_Still3_0830F01H_06.RCC	0830F01H	2015-08-30	High	F	Negative	NEG_A	21
20160901_Still3_0830F01H_06.RCC	0830F01H	2015-08-30	High	F	Negative	NEG_B	37
20160901_Still3_0830F01H_06.RCC	0830F01H	2015-08-30	High	F	Negative	NEG_C	3
20160901_Still3_0830F01H_06.RCC	0830F01H	2015-08-30	High	F	Negative	NEG_D	7
20160901_Still3_0830F01H_06.RCC	0830F01H	2015-08-30	High	F	Negative	NEG_E	20
20160901_Still3_0830F01H_06.RCC	0830F01H	2015-08-30	High	F	Negative	NEG_F	87
20160901_Still3_0830F01H_06.RCC	0830F01H	2015-08-30	High	F	Negative	NEG_G	20
20160901_Still3_0830F01H_06.RCC	0830F01H	2015-08-30	High	F	Negative	NEG_H	29
20160901_Still3_0830F01H_06.RCC	0830F01H	2015-08-30	High	F	Housekeeping	15_8	127782
20160901_Still3_0830F01H_06.RCC	0830F01H	2015-08-30	High	F	Housekeeping	187_1_CAYC_CAYF_CCAG	162247
20160901_Still3_0830F01H_06.RCC	0830F01H	2015-08-30	High	F	Housekeeping	comp61175_c0_seq94	1053
20160901_Still3_0830F01H_06.RCC	0830F01H	2015-08-30	High	F	Housekeeping	comp61968_c0_seq6	692
20160901_Still3_0830F01H_06.RCC	0830F01H	2015-08-30	High	F	Housekeeping	comp62062_c4_seq7	1031
20160901_Still3_0830F01H_06.RCC	0830F01H	2015-08-30	High	F	Housekeeping	comp62406_c1_seq15	863
20160901_Still3_0830F01H_06.RCC	0830F01H	2015-08-30	High	F	Housekeeping	comp63344_c0_seq12	1636
20160901_Still3_0830F01H_06.RCC	0830F01H	2015-08-30	High	F	Housekeeping	comp64151_c1_seq55	2500
20160901_Still3_0830F01H_06.RCC	0830F01H	2015-08-30	High	F	Target	0_0_CCAG28737.b1_CAYC_CAYF_CCAG	1364
20160901_Still3_0830F01H_06.RCC	0830F01H	2015-08-30	High	F	Target	1252_1_CAYC_CAYF_CCAG	3286
20160901_Still3_0830F01H_06.RCC	0830F01H	2015-08-30	High	F	Target	13341_0_CCAG36642.b1_CAYC_CAYF_CCAG	2281
20160901_Still3_0830F01H_06.RCC	0830F01H	2015-08-30	High	F	Target	14_5_CAYC_CAYF_CCAG	1575
20160901_Still3_0830F01H_06.RCC	0830F01H	2015-08-30	High	F	Target	1432_1_CAYC_CAYF_CCAG	3122
20160901_Still3_0830F01H_06.RCC	0830F01H	2015-08-30	High	F	Target	14392_1_CAYC_CAYF_CCAG	73742
20160901_Still3_0830F01H_06.RCC	0830F01H	2015-08-30	High	F	Target	14490_0_CCAG5543.g1_CAYC_CAYF_CCAG	105
20160901_Still3_0830F01H_06.RCC	0830F01H	2015-08-30	High	F	Target	14756_0_CCAG9200.b3_CAYC_CAYF_CCAG	3
20160901_Still3_0830F01H_06.RCC	0830F01H	2015-08-30	High	F	Target	1748_1_CAYC_CAYF_CCAG	3795
20160901_Still3_0830F01H_06.RCC	0830F01H	2015-08-30	High	F	Target	178_9_CAYC_CAYF_CCAG	8553
20160901_Still3_0830F01H_06.RCC	0830F01H	2015-08-30	High	F	Target	1837_1_CAYC_CAYF_CCAG	6934
20160901_Still3_0830F01H_06.RCC	0830F01H	2015-08-30	High	F	Target	2202_1_CAYC_CAYF_CCAG	10291
20160901_Still3_0830F01H_06.RCC	0830F01H	2015-08-30	High	F	Target	2758_1_CAYC_CAYF_CCAG	13265
20160901_Still3_0830F01H_06.RCC	0830F01H	2015-08-30	High	F	Target	3280_1_CAYC_CAYF_CCAG	71
20160901_Still3_0830F01H_06.RCC	0830F01H	2015-08-30	High	F	Target	3280_2_CAYC_CAYF_CCAG	100
20160901_Still3_0830F01H_06.RCC	0830F01H	2015-08-30	High	F	Target	3397_1_CAYC_CAYF_CCAG	3523
20160901_Still3_0830F01H_06.RCC	0830F01H	2015-08-30	High	F	Target	3924_1_CAYC_CAYF_CCAG	99
20160901_Still3_0830F01H_06.RCC	0830F01H	2015-08-30	High	F	Target	CCAG48604	214382
20160901_Still3_0830F01H_06.RCC	0830F01H	2015-08-30	High	F	Target	comp50435_c1_seq2	65168
20160901_Still3_0830F01H_06.RCC	0830F01H	2015-08-30	High	F	Target	comp55113_c2_seq1	1767
20160901_Still3_0830F01H_06.RCC	0830F01H	2015-08-30	High	F	Target	comp55834_c0_seq3	152
20160901_Still3_0830F01H_06.RCC	0830F01H	2015-08-30	High	F	Target	comp55959_c0_seq1	17811
20160901_Still3_0830F01H_06.RCC	0830F01H	2015-08-30	High	F	Target	comp56496_c0_seq4	72
20160901_Still3_0830F01H_06.RCC	0830F01H	2015-08-30	High	F	Target	comp56747_c2_seq2	2242
20160901_Still3_0830F01H_06.RCC	0830F01H	2015-08-30	High	F	Target	comp57952_c3_seq2	61
20160901_Still3_0830F01H_06.RCC	0830F01H	2015-08-30	High	F	Target	comp59049_c0_seq1	13452
20160901_Still3_0830F01H_06.RCC	0830F01H	2015-08-30	High	F	Target	comp60397_c0_seq1	616
20160901_Still3_0830F01H_06.RCC	0830F01H	2015-08-30	High	F	Target	comp62130_c0_seq4	5271
20160901_Still3_0830F01H_06.RCC	0830F01H	2015-08-30	High	F	Target	comp63155_c0_seq11	16268
20160901_Still3_0830F01H_06.RCC	0830F01H	2015-08-30	High	F	Target	comp64021_c3_seq1	7631
20160901_Still3_0830F01H_06.RCC	0830F01H	2015-08-30	High	F	Target	comp65435_c0_seq8	798
20160901_Still3_0830F01H_06.RCC	0830F01H	2015-08-30	High	F	Target	comp65993_c0_seq6	2820
20160901_Still3_0830F02H_07.RCC	0830F02H	2015-08-30	High	F	Positive	POS_A	17603
20160901_Still3_0830F02H_07.RCC	0830F02H	2015-08-30	High	F	Positive	POS_B	4844
20160901_Still3_0830F02H_07.RCC	0830F02H	2015-08-30	High	F	Positive	POS_C	1364
20160901_Still3_0830F02H_07.RCC	0830F02H	2015-08-30	High	F	Positive	POS_D	400
20160901_Still3_0830F02H_07.RCC	0830F02H	2015-08-30	High	F	Positive	POS_E	95
20160901_Still3_0830F02H_07.RCC	0830F02H	2015-08-30	High	F	Positive	POS_F	61
20160901_Still3_0830F02H_07.RCC	0830F02H	2015-08-30	High	F	Negative	NEG_A	23
20160901_Still3_0830F02H_07.RCC	0830F02H	2015-08-30	High	F	Negative	NEG_B	37
20160901_Still3_0830F02H_07.RCC	0830F02H	2015-08-30	High	F	Negative	NEG_C	8
20160901_Still3_0830F02H_07.RCC	0830F02H	2015-08-30	High	F	Negative	NEG_D	8
20160901_Still3_0830F02H_07.RCC	0830F02H	2015-08-30	High	F	Negative	NEG_E	37
20160901_Still3_0830F02H_07.RCC	0830F02H	2015-08-30	High	F	Negative	NEG_F	110
20160901_Still3_0830F02H_07.RCC	0830F02H	2015-08-30	High	F	Negative	NEG_G	10
20160901_Still3_0830F02H_07.RCC	0830F02H	2015-08-30	High	F	Negative	NEG_H	9
20160901_Still3_0830F02H_07.RCC	0830F02H	2015-08-30	High	F	Housekeeping	15_8	80815
20160901_Still3_0830F02H_07.RCC	0830F02H	2015-08-30	High	F	Housekeeping	187_1_CAYC_CAYF_CCAG	22456
20160901_Still3_0830F02H_07.RCC	0830F02H	2015-08-30	High	F	Housekeeping	comp61175_c0_seq94	1570
20160901_Still3_0830F02H_07.RCC	0830F02H	2015-08-30	High	F	Housekeeping	comp61968_c0_seq6	1038
20160901_Still3_0830F02H_07.RCC	0830F02H	2015-08-30	High	F	Housekeeping	comp62062_c4_seq7	1702
20160901_Still3_0830F02H_07.RCC	0830F02H	2015-08-30	High	F	Housekeeping	comp62406_c1_seq15	2295
20160901_Still3_0830F02H_07.RCC	0830F02H	2015-08-30	High	F	Housekeeping	comp63344_c0_seq12	2879
20160901_Still3_0830F02H_07.RCC	0830F02H	2015-08-30	High	F	Housekeeping	comp64151_c1_seq55	2184
20160901_Still3_0830F02H_07.RCC	0830F02H	2015-08-30	High	F	Target	0_0_CCAG28737.b1_CAYC_CAYF_CCAG	1846
20160901_Still3_0830F02H_07.RCC	0830F02H	2015-08-30	High	F	Target	1252_1_CAYC_CAYF_CCAG	6734
20160901_Still3_0830F02H_07.RCC	0830F02H	2015-08-30	High	F	Target	13341_0_CCAG36642.b1_CAYC_CAYF_CCAG	697
20160901_Still3_0830F02H_07.RCC	0830F02H	2015-08-30	High	F	Target	14_5_CAYC_CAYF_CCAG	2932
20160901_Still3_0830F02H_07.RCC	0830F02H	2015-08-30	High	F	Target	1432_1_CAYC_CAYF_CCAG	1077
20160901_Still3_0830F02H_07.RCC	0830F02H	2015-08-30	High	F	Target	14392_1_CAYC_CAYF_CCAG	147123
20160901_Still3_0830F02H_07.RCC	0830F02H	2015-08-30	High	F	Target	14490_0_CCAG5543.g1_CAYC_CAYF_CCAG	62
20160901_Still3_0830F02H_07.RCC	0830F02H	2015-08-30	High	F	Target	14756_0_CCAG9200.b3_CAYC_CAYF_CCAG	1
20160901_Still3_0830F02H_07.RCC	0830F02H	2015-08-30	High	F	Target	1748_1_CAYC_CAYF_CCAG	6697
20160901_Still3_0830F02H_07.RCC	0830F02H	2015-08-30	High	F	Target	178_9_CAYC_CAYF_CCAG	63884
20160901_Still3_0830F02H_07.RCC	0830F02H	2015-08-30	High	F	Target	1837_1_CAYC_CAYF_CCAG	19645
20160901_Still3_0830F02H_07.RCC	0830F02H	2015-08-30	High	F	Target	2202_1_CAYC_CAYF_CCAG	7768
20160901_Still3_0830F02H_07.RCC	0830F02H	2015-08-30	High	F	Target	2758_1_CAYC_CAYF_CCAG	21309
20160901_Still3_0830F02H_07.RCC	0830F02H	2015-08-30	High	F	Target	3280_1_CAYC_CAYF_CCAG	6013
20160901_Still3_0830F02H_07.RCC	0830F02H	2015-08-30	High	F	Target	3280_2_CAYC_CAYF_CCAG	5666
20160901_Still3_0830F02H_07.RCC	0830F02H	2015-08-30	High	F	Target	3397_1_CAYC_CAYF_CCAG	3317
20160901_Still3_0830F02H_07.RCC	0830F02H	2015-08-30	High	F	Target	3924_1_CAYC_CAYF_CCAG	126
20160901_Still3_0830F02H_07.RCC	0830F02H	2015-08-30	High	F	Target	CCAG48604	195901
20160901_Still3_0830F02H_07.RCC	0830F02H	2015-08-30	High	F	Target	comp50435_c1_seq2	56
20160901_Still3_0830F02H_07.RCC	0830F02H	2015-08-30	High	F	Target	comp55113_c2_seq1	2682
20160901_Still3_0830F02H_07.RCC	0830F02H	2015-08-30	High	F	Target	comp55834_c0_seq3	34
20160901_Still3_0830F02H_07.RCC	0830F02H	2015-08-30	High	F	Target	comp55959_c0_seq1	16829
20160901_Still3_0830F02H_07.RCC	0830F02H	2015-08-30	High	F	Target	comp56496_c0_seq4	79
20160901_Still3_0830F02H_07.RCC	0830F02H	2015-08-30	High	F	Target	comp56747_c2_seq2	4230
20160901_Still3_0830F02H_07.RCC	0830F02H	2015-08-30	High	F	Target	comp57952_c3_seq2	88
20160901_Still3_0830F02H_07.RCC	0830F02H	2015-08-30	High	F	Target	comp59049_c0_seq1	151
20160901_Still3_0830F02H_07.RCC	0830F02H	2015-08-30	High	F	Target	comp60397_c0_seq1	214
20160901_Still3_0830F02H_07.RCC	0830F02H	2015-08-30	High	F	Target	comp62130_c0_seq4	5711
20160901_Still3_0830F02H_07.RCC	0830F02H	2015-08-30	High	F	Target	comp63155_c0_seq11	9783
20160901_Still3_0830F02H_07.RCC	0830F02H	2015-08-30	High	F	Target	comp64021_c3_seq1	7662
20160901_Still3_0830F02H_07.RCC	0830F02H	2015-08-30	High	F	Target	comp65435_c0_seq8	1080
20160901_Still3_0830F02H_07.RCC	0830F02H	2015-08-30	High	F	Target	comp65993_c0_seq6	2259
20160901_Still3_0830F03H_08.RCC	0830F03H	2015-08-30	High	F	Positive	POS_A	15170
20160901_Still3_0830F03H_08.RCC	0830F03H	2015-08-30	High	F	Positive	POS_B	4209
20160901_Still3_0830F03H_08.RCC	0830F03H	2015-08-30	High	F	Positive	POS_C	1243
20160901_Still3_0830F03H_08.RCC	0830F03H	2015-08-30	High	F	Positive	POS_D	358
20160901_Still3_0830F03H_08.RCC	0830F03H	2015-08-30	High	F	Positive	POS_E	73
20160901_Still3_0830F03H_08.RCC	0830F03H	2015-08-30	High	F	Positive	POS_F	56
20160901_Still3_0830F03H_08.RCC	0830F03H	2015-08-30	High	F	Negative	NEG_A	10
20160901_Still3_0830F03H_08.RCC	0830F03H	2015-08-30	High	F	Negative	NEG_B	28
20160901_Still3_0830F03H_08.RCC	0830F03H	2015-08-30	High	F	Negative	NEG_C	6
20160901_Still3_0830F03H_08.RCC	0830F03H	2015-08-30	High	F	Negative	NEG_D	7
20160901_Still3_0830F03H_08.RCC	0830F03H	2015-08-30	High	F	Negative	NEG_E	22
20160901_Still3_0830F03H_08.RCC	0830F03H	2015-08-30	High	F	Negative	NEG_F	76
20160901_Still3_0830F03H_08.RCC	0830F03H	2015-08-30	High	F	Negative	NEG_G	33
20160901_Still3_0830F03H_08.RCC	0830F03H	2015-08-30	High	F	Negative	NEG_H	41
20160901_Still3_0830F03H_08.RCC	0830F03H	2015-08-30	High	F	Housekeeping	15_8	127930
20160901_Still3_0830F03H_08.RCC	0830F03H	2015-08-30	High	F	Housekeeping	187_1_CAYC_CAYF_CCAG	215302
20160901_Still3_0830F03H_08.RCC	0830F03H	2015-08-30	High	F	Housekeeping	comp61175_c0_seq94	974
20160901_Still3_0830F03H_08.RCC	0830F03H	2015-08-30	High	F	Housekeeping	comp61968_c0_seq6	710
20160901_Still3_0830F03H_08.RCC	0830F03H	2015-08-30	High	F	Housekeeping	comp62062_c4_seq7	1120
20160901_Still3_0830F03H_08.RCC	0830F03H	2015-08-30	High	F	Housekeeping	comp62406_c1_seq15	1282
20160901_Still3_0830F03H_08.RCC	0830F03H	2015-08-30	High	F	Housekeeping	comp63344_c0_seq12	1747
20160901_Still3_0830F03H_08.RCC	0830F03H	2015-08-30	High	F	Housekeeping	comp64151_c1_seq55	2004
20160901_Still3_0830F03H_08.RCC	0830F03H	2015-08-30	High	F	Target	0_0_CCAG28737.b1_CAYC_CAYF_CCAG	1346
20160901_Still3_0830F03H_08.RCC	0830F03H	2015-08-30	High	F	Target	1252_1_CAYC_CAYF_CCAG	5531
20160901_Still3_0830F03H_08.RCC	0830F03H	2015-08-30	High	F	Target	13341_0_CCAG36642.b1_CAYC_CAYF_CCAG	1239
20160901_Still3_0830F03H_08.RCC	0830F03H	2015-08-30	High	F	Target	14_5_CAYC_CAYF_CCAG	1496
20160901_Still3_0830F03H_08.RCC	0830F03H	2015-08-30	High	F	Target	1432_1_CAYC_CAYF_CCAG	3196
20160901_Still3_0830F03H_08.RCC	0830F03H	2015-08-30	High	F	Target	14392_1_CAYC_CAYF_CCAG	52495
20160901_Still3_0830F03H_08.RCC	0830F03H	2015-08-30	High	F	Target	14490_0_CCAG5543.g1_CAYC_CAYF_CCAG	115
20160901_Still3_0830F03H_08.RCC	0830F03H	2015-08-30	High	F	Target	14756_0_CCAG9200.b3_CAYC_CAYF_CCAG	3
20160901_Still3_0830F03H_08.RCC	0830F03H	2015-08-30	High	F	Target	1748_1_CAYC_CAYF_CCAG	3801
20160901_Still3_0830F03H_08.RCC	0830F03H	2015-08-30	High	F	Target	178_9_CAYC_CAYF_CCAG	9418
20160901_Still3_0830F03H_08.RCC	0830F03H	2015-08-30	High	F	Target	1837_1_CAYC_CAYF_CCAG	6114
20160901_Still3_0830F03H_08.RCC	0830F03H	2015-08-30	High	F	Target	2202_1_CAYC_CAYF_CCAG	4455
20160901_Still3_0830F03H_08.RCC	0830F03H	2015-08-30	High	F	Target	2758_1_CAYC_CAYF_CCAG	11919
20160901_Still3_0830F03H_08.RCC	0830F03H	2015-08-30	High	F	Target	3280_1_CAYC_CAYF_CCAG	232
20160901_Still3_0830F03H_08.RCC	0830F03H	2015-08-30	High	F	Target	3280_2_CAYC_CAYF_CCAG	284
20160901_Still3_0830F03H_08.RCC	0830F03H	2015-08-30	High	F	Target	3397_1_CAYC_CAYF_CCAG	3489
20160901_Still3_0830F03H_08.RCC	0830F03H	2015-08-30	High	F	Target	3924_1_CAYC_CAYF_CCAG	66
20160901_Still3_0830F03H_08.RCC	0830F03H	2015-08-30	High	F	Target	CCAG48604	177585
20160901_Still3_0830F03H_08.RCC	0830F03H	2015-08-30	High	F	Target	comp50435_c1_seq2	98077
20160901_Still3_0830F03H_08.RCC	0830F03H	2015-08-30	High	F	Target	comp55113_c2_seq1	2178
20160901_Still3_0830F03H_08.RCC	0830F03H	2015-08-30	High	F	Target	comp55834_c0_seq3	593
20160901_Still3_0830F03H_08.RCC	0830F03H	2015-08-30	High	F	Target	comp55959_c0_seq1	22836
20160901_Still3_0830F03H_08.RCC	0830F03H	2015-08-30	High	F	Target	comp56496_c0_seq4	56
20160901_Still3_0830F03H_08.RCC	0830F03H	2015-08-30	High	F	Target	comp56747_c2_seq2	2385
20160901_Still3_0830F03H_08.RCC	0830F03H	2015-08-30	High	F	Target	comp57952_c3_seq2	139
20160901_Still3_0830F03H_08.RCC	0830F03H	2015-08-30	High	F	Target	comp59049_c0_seq1	27215
20160901_Still3_0830F03H_08.RCC	0830F03H	2015-08-30	High	F	Target	comp60397_c0_seq1	572
20160901_Still3_0830F03H_08.RCC	0830F03H	2015-08-30	High	F	Target	comp62130_c0_seq4	6092
20160901_Still3_0830F03H_08.RCC	0830F03H	2015-08-30	High	F	Target	comp63155_c0_seq11	15546
20160901_Still3_0830F03H_08.RCC	0830F03H	2015-08-30	High	F	Target	comp64021_c3_seq1	8408
20160901_Still3_0830F03H_08.RCC	0830F03H	2015-08-30	High	F	Target	comp65435_c0_seq8	876
20160901_Still3_0830F03H_08.RCC	0830F03H	2015-08-30	High	F	Target	comp65993_c0_seq6	1636
20160901_Still3_0830F04H_09.RCC	0830F04H	2015-08-30	High	F	Positive	POS_A	15574
20160901_Still3_0830F04H_09.RCC	0830F04H	2015-08-30	High	F	Positive	POS_B	4304
20160901_Still3_0830F04H_09.RCC	0830F04H	2015-08-30	High	F	Positive	POS_C	1147
20160901_Still3_0830F04H_09.RCC	0830F04H	2015-08-30	High	F	Positive	POS_D	421
20160901_Still3_0830F04H_09.RCC	0830F04H	2015-08-30	High	F	Positive	POS_E	94
20160901_Still3_0830F04H_09.RCC	0830F04H	2015-08-30	High	F	Positive	POS_F	36
20160901_Still3_0830F04H_09.RCC	0830F04H	2015-08-30	High	F	Negative	NEG_A	19
20160901_Still3_0830F04H_09.RCC	0830F04H	2015-08-30	High	F	Negative	NEG_B	25
20160901_Still3_0830F04H_09.RCC	0830F04H	2015-08-30	High	F	Negative	NEG_C	5
20160901_Still3_0830F04H_09.RCC	0830F04H	2015-08-30	High	F	Negative	NEG_D	5
20160901_Still3_0830F04H_09.RCC	0830F04H	2015-08-30	High	F	Negative	NEG_E	23
20160901_Still3_0830F04H_09.RCC	0830F04H	2015-08-30	High	F	Negative	NEG_F	95
20160901_Still3_0830F04H_09.RCC	0830F04H	2015-08-30	High	F	Negative	NEG_G	12
20160901_Still3_0830F04H_09.RCC	0830F04H	2015-08-30	High	F	Negative	NEG_H	25
20160901_Still3_0830F04H_09.RCC	0830F04H	2015-08-30	High	F	Housekeeping	15_8	254167
20160901_Still3_0830F04H_09.RCC	0830F04H	2015-08-30	High	F	Housekeeping	187_1_CAYC_CAYF_CCAG	40820
20160901_Still3_0830F04H_09.RCC	0830F04H	2015-08-30	High	F	Housekeeping	comp61175_c0_seq94	1212
20160901_Still3_0830F04H_09.RCC	0830F04H	2015-08-30	High	F	Housekeeping	comp61968_c0_seq6	679
20160901_Still3_0830F04H_09.RCC	0830F04H	2015-08-30	High	F	Housekeeping	comp62062_c4_seq7	953
20160901_Still3_0830F04H_09.RCC	0830F04H	2015-08-30	High	F	Housekeeping	comp62406_c1_seq15	1133
20160901_Still3_0830F04H_09.RCC	0830F04H	2015-08-30	High	F	Housekeeping	comp63344_c0_seq12	2492
20160901_Still3_0830F04H_09.RCC	0830F04H	2015-08-30	High	F	Housekeeping	comp64151_c1_seq55	2019
20160901_Still3_0830F04H_09.RCC	0830F04H	2015-08-30	High	F	Target	0_0_CCAG28737.b1_CAYC_CAYF_CCAG	2059
20160901_Still3_0830F04H_09.RCC	0830F04H	2015-08-30	High	F	Target	1252_1_CAYC_CAYF_CCAG	1084
20160901_Still3_0830F04H_09.RCC	0830F04H	2015-08-30	High	F	Target	13341_0_CCAG36642.b1_CAYC_CAYF_CCAG	885
20160901_Still3_0830F04H_09.RCC	0830F04H	2015-08-30	High	F	Target	14_5_CAYC_CAYF_CCAG	104
20160901_Still3_0830F04H_09.RCC	0830F04H	2015-08-30	High	F	Target	1432_1_CAYC_CAYF_CCAG	929
20160901_Still3_0830F04H_09.RCC	0830F04H	2015-08-30	High	F	Target	14392_1_CAYC_CAYF_CCAG	338
20160901_Still3_0830F04H_09.RCC	0830F04H	2015-08-30	High	F	Target	14490_0_CCAG5543.g1_CAYC_CAYF_CCAG	170
20160901_Still3_0830F04H_09.RCC	0830F04H	2015-08-30	High	F	Target	14756_0_CCAG9200.b3_CAYC_CAYF_CCAG	919
20160901_Still3_0830F04H_09.RCC	0830F04H	2015-08-30	High	F	Target	1748_1_CAYC_CAYF_CCAG	10633
20160901_Still3_0830F04H_09.RCC	0830F04H	2015-08-30	High	F	Target	178_9_CAYC_CAYF_CCAG	22372
20160901_Still3_0830F04H_09.RCC	0830F04H	2015-08-30	High	F	Target	1837_1_CAYC_CAYF_CCAG	12340
20160901_Still3_0830F04H_09.RCC	0830F04H	2015-08-30	High	F	Target	2202_1_CAYC_CAYF_CCAG	13493
20160901_Still3_0830F04H_09.RCC	0830F04H	2015-08-30	High	F	Target	2758_1_CAYC_CAYF_CCAG	23115
20160901_Still3_0830F04H_09.RCC	0830F04H	2015-08-30	High	F	Target	3280_1_CAYC_CAYF_CCAG	77
20160901_Still3_0830F04H_09.RCC	0830F04H	2015-08-30	High	F	Target	3280_2_CAYC_CAYF_CCAG	113
20160901_Still3_0830F04H_09.RCC	0830F04H	2015-08-30	High	F	Target	3397_1_CAYC_CAYF_CCAG	3768
20160901_Still3_0830F04H_09.RCC	0830F04H	2015-08-30	High	F	Target	3924_1_CAYC_CAYF_CCAG	2488
20160901_Still3_0830F04H_09.RCC	0830F04H	2015-08-30	High	F	Target	CCAG48604	295226
20160901_Still3_0830F04H_09.RCC	0830F04H	2015-08-30	High	F	Target	comp50435_c1_seq2	2130
20160901_Still3_0830F04H_09.RCC	0830F04H	2015-08-30	High	F	Target	comp55113_c2_seq1	9640
20160901_Still3_0830F04H_09.RCC	0830F04H	2015-08-30	High	F	Target	comp55834_c0_seq3	340
20160901_Still3_0830F04H_09.RCC	0830F04H	2015-08-30	High	F	Target	comp55959_c0_seq1	8896
20160901_Still3_0830F04H_09.RCC	0830F04H	2015-08-30	High	F	Target	comp56496_c0_seq4	64
20160901_Still3_0830F04H_09.RCC	0830F04H	2015-08-30	High	F	Target	comp56747_c2_seq2	1930
20160901_Still3_0830F04H_09.RCC	0830F04H	2015-08-30	High	F	Target	comp57952_c3_seq2	65
20160901_Still3_0830F04H_09.RCC	0830F04H	2015-08-30	High	F	Target	comp59049_c0_seq1	44487
20160901_Still3_0830F04H_09.RCC	0830F04H	2015-08-30	High	F	Target	comp60397_c0_seq1	258
20160901_Still3_0830F04H_09.RCC	0830F04H	2015-08-30	High	F	Target	comp62130_c0_seq4	3406
20160901_Still3_0830F04H_09.RCC	0830F04H	2015-08-30	High	F	Target	comp63155_c0_seq11	8207
20160901_Still3_0830F04H_09.RCC	0830F04H	2015-08-30	High	F	Target	comp64021_c3_seq1	5533
20160901_Still3_0830F04H_09.RCC	0830F04H	2015-08-30	High	F	Target	comp65435_c0_seq8	510
20160901_Still3_0830F04H_09.RCC	0830F04H	2015-08-30	High	F	Target	comp65993_c0_seq6	1543
20160901_Still3_0830F05H_10.RCC	0830F05H	2015-08-30	High	F	Positive	POS_A	13192
20160901_Still3_0830F05H_10.RCC	0830F05H	2015-08-30	High	F	Positive	POS_B	3974
20160901_Still3_0830F05H_10.RCC	0830F05H	2015-08-30	High	F	Positive	POS_C	1047
20160901_Still3_0830F05H_10.RCC	0830F05H	2015-08-30	High	F	Positive	POS_D	307
20160901_Still3_0830F05H_10.RCC	0830F05H	2015-08-30	High	F	Positive	POS_E	69
20160901_Still3_0830F05H_10.RCC	0830F05H	2015-08-30	High	F	Positive	POS_F	39
20160901_Still3_0830F05H_10.RCC	0830F05H	2015-08-30	High	F	Negative	NEG_A	15
20160901_Still3_0830F05H_10.RCC	0830F05H	2015-08-30	High	F	Negative	NEG_B	30
20160901_Still3_0830F05H_10.RCC	0830F05H	2015-08-30	High	F	Negative	NEG_C	7
20160901_Still3_0830F05H_10.RCC	0830F05H	2015-08-30	High	F	Negative	NEG_D	9
20160901_Still3_0830F05H_10.RCC	0830F05H	2015-08-30	High	F	Negative	NEG_E	19
20160901_Still3_0830F05H_10.RCC	0830F05H	2015-08-30	High	F	Negative	NEG_F	67
20160901_Still3_0830F05H_10.RCC	0830F05H	2015-08-30	High	F	Negative	NEG_G	19
20160901_Still3_0830F05H_10.RCC	0830F05H	2015-08-30	High	F	Negative	NEG_H	36
20160901_Still3_0830F05H_10.RCC	0830F05H	2015-08-30	High	F	Housekeeping	15_8	128048
20160901_Still3_0830F05H_10.RCC	0830F05H	2015-08-30	High	F	Housekeeping	187_1_CAYC_CAYF_CCAG	172062
20160901_Still3_0830F05H_10.RCC	0830F05H	2015-08-30	High	F	Housekeeping	comp61175_c0_seq94	971
20160901_Still3_0830F05H_10.RCC	0830F05H	2015-08-30	High	F	Housekeeping	comp61968_c0_seq6	679
20160901_Still3_0830F05H_10.RCC	0830F05H	2015-08-30	High	F	Housekeeping	comp62062_c4_seq7	1061
20160901_Still3_0830F05H_10.RCC	0830F05H	2015-08-30	High	F	Housekeeping	comp62406_c1_seq15	967
20160901_Still3_0830F05H_10.RCC	0830F05H	2015-08-30	High	F	Housekeeping	comp63344_c0_seq12	1908
20160901_Still3_0830F05H_10.RCC	0830F05H	2015-08-30	High	F	Housekeeping	comp64151_c1_seq55	2660
20160901_Still3_0830F05H_10.RCC	0830F05H	2015-08-30	High	F	Target	0_0_CCAG28737.b1_CAYC_CAYF_CCAG	625
20160901_Still3_0830F05H_10.RCC	0830F05H	2015-08-30	High	F	Target	1252_1_CAYC_CAYF_CCAG	5763
20160901_Still3_0830F05H_10.RCC	0830F05H	2015-08-30	High	F	Target	13341_0_CCAG36642.b1_CAYC_CAYF_CCAG	2310
20160901_Still3_0830F05H_10.RCC	0830F05H	2015-08-30	High	F	Target	14_5_CAYC_CAYF_CCAG	2412
20160901_Still3_0830F05H_10.RCC	0830F05H	2015-08-30	High	F	Target	1432_1_CAYC_CAYF_CCAG	3284
20160901_Still3_0830F05H_10.RCC	0830F05H	2015-08-30	High	F	Target	14392_1_CAYC_CAYF_CCAG	93641
20160901_Still3_0830F05H_10.RCC	0830F05H	2015-08-30	High	F	Target	14490_0_CCAG5543.g1_CAYC_CAYF_CCAG	105
20160901_Still3_0830F05H_10.RCC	0830F05H	2015-08-30	High	F	Target	14756_0_CCAG9200.b3_CAYC_CAYF_CCAG	4
20160901_Still3_0830F05H_10.RCC	0830F05H	2015-08-30	High	F	Target	1748_1_CAYC_CAYF_CCAG	1722
20160901_Still3_0830F05H_10.RCC	0830F05H	2015-08-30	High	F	Target	178_9_CAYC_CAYF_CCAG	7711
20160901_Still3_0830F05H_10.RCC	0830F05H	2015-08-30	High	F	Target	1837_1_CAYC_CAYF_CCAG	9599
20160901_Still3_0830F05H_10.RCC	0830F05H	2015-08-30	High	F	Target	2202_1_CAYC_CAYF_CCAG	8166
20160901_Still3_0830F05H_10.RCC	0830F05H	2015-08-30	High	F	Target	2758_1_CAYC_CAYF_CCAG	12187
20160901_Still3_0830F05H_10.RCC	0830F05H	2015-08-30	High	F	Target	3280_1_CAYC_CAYF_CCAG	57
20160901_Still3_0830F05H_10.RCC	0830F05H	2015-08-30	High	F	Target	3280_2_CAYC_CAYF_CCAG	97
20160901_Still3_0830F05H_10.RCC	0830F05H	2015-08-30	High	F	Target	3397_1_CAYC_CAYF_CCAG	3161
20160901_Still3_0830F05H_10.RCC	0830F05H	2015-08-30	High	F	Target	3924_1_CAYC_CAYF_CCAG	72
20160901_Still3_0830F05H_10.RCC	0830F05H	2015-08-30	High	F	Target	CCAG48604	154396
20160901_Still3_0830F05H_10.RCC	0830F05H	2015-08-30	High	F	Target	comp50435_c1_seq2	75041
20160901_Still3_0830F05H_10.RCC	0830F05H	2015-08-30	High	F	Target	comp55113_c2_seq1	1824
20160901_Still3_0830F05H_10.RCC	0830F05H	2015-08-30	High	F	Target	comp55834_c0_seq3	308
20160901_Still3_0830F05H_10.RCC	0830F05H	2015-08-30	High	F	Target	comp55959_c0_seq1	23202
20160901_Still3_0830F05H_10.RCC	0830F05H	2015-08-30	High	F	Target	comp56496_c0_seq4	56
20160901_Still3_0830F05H_10.RCC	0830F05H	2015-08-30	High	F	Target	comp56747_c2_seq2	2328
20160901_Still3_0830F05H_10.RCC	0830F05H	2015-08-30	High	F	Target	comp57952_c3_seq2	44
20160901_Still3_0830F05H_10.RCC	0830F05H	2015-08-30	High	F	Target	comp59049_c0_seq1	16104
20160901_Still3_0830F05H_10.RCC	0830F05H	2015-08-30	High	F	Target	comp60397_c0_seq1	811
20160901_Still3_0830F05H_10.RCC	0830F05H	2015-08-30	High	F	Target	comp62130_c0_seq4	6130
20160901_Still3_0830F05H_10.RCC	0830F05H	2015-08-30	High	F	Target	comp63155_c0_seq11	16986
20160901_Still3_0830F05H_10.RCC	0830F05H	2015-08-30	High	F	Target	comp64021_c3_seq1	7986
20160901_Still3_0830F05H_10.RCC	0830F05H	2015-08-30	High	F	Target	comp65435_c0_seq8	733
20160901_Still3_0830F05H_10.RCC	0830F05H	2015-08-30	High	F	Target	comp65993_c0_seq6	3214
20160901_Still3_0830M01H_01.RCC	0830M01H	2015-08-30	High	M	Positive	POS_A	15003
20160901_Still3_0830M01H_01.RCC	0830M01H	2015-08-30	High	M	Positive	POS_B	3919
20160901_Still3_0830M01H_01.RCC	0830M01H	2015-08-30	High	M	Positive	POS_C	1173
20160901_Still3_0830M01H_01.RCC	0830M01H	2015-08-30	High	M	Positive	POS_D	340
20160901_Still3_0830M01H_01.RCC	0830M01H	2015-08-30	High	M	Positive	POS_E	73
20160901_Still3_0830M01H_01.RCC	0830M01H	2015-08-30	High	M	Positive	POS_F	58
20160901_Still3_0830M01H_01.RCC	0830M01H	2015-08-30	High	M	Negative	NEG_A	19
20160901_Still3_0830M01H_01.RCC	0830M01H	2015-08-30	High	M	Negative	NEG_B	39
20160901_Still3_0830M01H_01.RCC	0830M01H	2015-08-30	High	M	Negative	NEG_C	3
20160901_Still3_0830M01H_01.RCC	0830M01H	2015-08-30	High	M	Negative	NEG_D	4
20160901_Still3_0830M01H_01.RCC	0830M01H	2015-08-30	High	M	Negative	NEG_E	13
20160901_Still3_0830M01H_01.RCC	0830M01H	2015-08-30	High	M	Negative	NEG_F	120
20160901_Still3_0830M01H_01.RCC	0830M01H	2015-08-30	High	M	Negative	NEG_G	6
20160901_Still3_0830M01H_01.RCC	0830M01H	2015-08-30	High	M	Negative	NEG_H	9
20160901_Still3_0830M01H_01.RCC	0830M01H	2015-08-30	High	M	Housekeeping	15_8	166624
20160901_Still3_0830M01H_01.RCC	0830M01H	2015-08-30	High	M	Housekeeping	187_1_CAYC_CAYF_CCAG	17404
20160901_Still3_0830M01H_01.RCC	0830M01H	2015-08-30	High	M	Housekeeping	comp61175_c0_seq94	1011
20160901_Still3_0830M01H_01.RCC	0830M01H	2015-08-30	High	M	Housekeeping	comp61968_c0_seq6	577
20160901_Still3_0830M01H_01.RCC	0830M01H	2015-08-30	High	M	Housekeeping	comp62062_c4_seq7	771
20160901_Still3_0830M01H_01.RCC	0830M01H	2015-08-30	High	M	Housekeeping	comp62406_c1_seq15	1245
20160901_Still3_0830M01H_01.RCC	0830M01H	2015-08-30	High	M	Housekeeping	comp63344_c0_seq12	1566
20160901_Still3_0830M01H_01.RCC	0830M01H	2015-08-30	High	M	Housekeeping	comp64151_c1_seq55	1933
20160901_Still3_0830M01H_01.RCC	0830M01H	2015-08-30	High	M	Target	0_0_CCAG28737.b1_CAYC_CAYF_CCAG	2796
20160901_Still3_0830M01H_01.RCC	0830M01H	2015-08-30	High	M	Target	1252_1_CAYC_CAYF_CCAG	1417
20160901_Still3_0830M01H_01.RCC	0830M01H	2015-08-30	High	M	Target	13341_0_CCAG36642.b1_CAYC_CAYF_CCAG	593
20160901_Still3_0830M01H_01.RCC	0830M01H	2015-08-30	High	M	Target	14_5_CAYC_CAYF_CCAG	1398
20160901_Still3_0830M01H_01.RCC	0830M01H	2015-08-30	High	M	Target	1432_1_CAYC_CAYF_CCAG	596
20160901_Still3_0830M01H_01.RCC	0830M01H	2015-08-30	High	M	Target	14392_1_CAYC_CAYF_CCAG	647
20160901_Still3_0830M01H_01.RCC	0830M01H	2015-08-30	High	M	Target	14490_0_CCAG5543.g1_CAYC_CAYF_CCAG	105
20160901_Still3_0830M01H_01.RCC	0830M01H	2015-08-30	High	M	Target	14756_0_CCAG9200.b3_CAYC_CAYF_CCAG	81
20160901_Still3_0830M01H_01.RCC	0830M01H	2015-08-30	High	M	Target	1748_1_CAYC_CAYF_CCAG	10879
20160901_Still3_0830M01H_01.RCC	0830M01H	2015-08-30	High	M	Target	178_9_CAYC_CAYF_CCAG	62639
20160901_Still3_0830M01H_01.RCC	0830M01H	2015-08-30	High	M	Target	1837_1_CAYC_CAYF_CCAG	14412
20160901_Still3_0830M01H_01.RCC	0830M01H	2015-08-30	High	M	Target	2202_1_CAYC_CAYF_CCAG	20735
20160901_Still3_0830M01H_01.RCC	0830M01H	2015-08-30	High	M	Target	2758_1_CAYC_CAYF_CCAG	17320
20160901_Still3_0830M01H_01.RCC	0830M01H	2015-08-30	High	M	Target	3280_1_CAYC_CAYF_CCAG	36
20160901_Still3_0830M01H_01.RCC	0830M01H	2015-08-30	High	M	Target	3280_2_CAYC_CAYF_CCAG	56
20160901_Still3_0830M01H_01.RCC	0830M01H	2015-08-30	High	M	Target	3397_1_CAYC_CAYF_CCAG	2851
20160901_Still3_0830M01H_01.RCC	0830M01H	2015-08-30	High	M	Target	3924_1_CAYC_CAYF_CCAG	278
20160901_Still3_0830M01H_01.RCC	0830M01H	2015-08-30	High	M	Target	CCAG48604	311756
20160901_Still3_0830M01H_01.RCC	0830M01H	2015-08-30	High	M	Target	comp50435_c1_seq2	1375
20160901_Still3_0830M01H_01.RCC	0830M01H	2015-08-30	High	M	Target	comp55113_c2_seq1	11841
20160901_Still3_0830M01H_01.RCC	0830M01H	2015-08-30	High	M	Target	comp55834_c0_seq3	63
20160901_Still3_0830M01H_01.RCC	0830M01H	2015-08-30	High	M	Target	comp55959_c0_seq1	8136
20160901_Still3_0830M01H_01.RCC	0830M01H	2015-08-30	High	M	Target	comp56496_c0_seq4	88
20160901_Still3_0830M01H_01.RCC	0830M01H	2015-08-30	High	M	Target	comp56747_c2_seq2	2352
20160901_Still3_0830M01H_01.RCC	0830M01H	2015-08-30	High	M	Target	comp57952_c3_seq2	68
20160901_Still3_0830M01H_01.RCC	0830M01H	2015-08-30	High	M	Target	comp59049_c0_seq1	10837
20160901_Still3_0830M01H_01.RCC	0830M01H	2015-08-30	High	M	Target	comp60397_c0_seq1	122
20160901_Still3_0830M01H_01.RCC	0830M01H	2015-08-30	High	M	Target	comp62130_c0_seq4	3417
20160901_Still3_0830M01H_01.RCC	0830M01H	2015-08-30	High	M	Target	comp63155_c0_seq11	6792
20160901_Still3_0830M01H_01.RCC	0830M01H	2015-08-30	High	M	Target	comp64021_c3_seq1	6168
20160901_Still3_0830M01H_01.RCC	0830M01H	2015-08-30	High	M	Target	comp65435_c0_seq8	452
20160901_Still3_0830M01H_01.RCC	0830M01H	2015-08-30	High	M	Target	comp65993_c0_seq6	1308
20160901_Still3_0830M02H_02.RCC	0830M02H	2015-08-30	High	M	Positive	POS_A	15749
20160901_Still3_0830M02H_02.RCC	0830M02H	2015-08-30	High	M	Positive	POS_B	4278
20160901_Still3_0830M02H_02.RCC	0830M02H	2015-08-30	High	M	Positive	POS_C	1198
20160901_Still3_0830M02H_02.RCC	0830M02H	2015-08-30	High	M	Positive	POS_D	342
20160901_Still3_0830M02H_02.RCC	0830M02H	2015-08-30	High	M	Positive	POS_E	79
20160901_Still3_0830M02H_02.RCC	0830M02H	2015-08-30	High	M	Positive	POS_F	53
20160901_Still3_0830M02H_02.RCC	0830M02H	2015-08-30	High	M	Negative	NEG_A	14
20160901_Still3_0830M02H_02.RCC	0830M02H	2015-08-30	High	M	Negative	NEG_B	13
20160901_Still3_0830M02H_02.RCC	0830M02H	2015-08-30	High	M	Negative	NEG_C	2
20160901_Still3_0830M02H_02.RCC	0830M02H	2015-08-30	High	M	Negative	NEG_D	4
20160901_Still3_0830M02H_02.RCC	0830M02H	2015-08-30	High	M	Negative	NEG_E	13
20160901_Still3_0830M02H_02.RCC	0830M02H	2015-08-30	High	M	Negative	NEG_F	78
20160901_Still3_0830M02H_02.RCC	0830M02H	2015-08-30	High	M	Negative	NEG_G	20
20160901_Still3_0830M02H_02.RCC	0830M02H	2015-08-30	High	M	Negative	NEG_H	29
20160901_Still3_0830M02H_02.RCC	0830M02H	2015-08-30	High	M	Housekeeping	15_8	123631
20160901_Still3_0830M02H_02.RCC	0830M02H	2015-08-30	High	M	Housekeeping	187_1_CAYC_CAYF_CCAG	161719
20160901_Still3_0830M02H_02.RCC	0830M02H	2015-08-30	High	M	Housekeeping	comp61175_c0_seq94	819
20160901_Still3_0830M02H_02.RCC	0830M02H	2015-08-30	High	M	Housekeeping	comp61968_c0_seq6	545
20160901_Still3_0830M02H_02.RCC	0830M02H	2015-08-30	High	M	Housekeeping	comp62062_c4_seq7	660
20160901_Still3_0830M02H_02.RCC	0830M02H	2015-08-30	High	M	Housekeeping	comp62406_c1_seq15	988
20160901_Still3_0830M02H_02.RCC	0830M02H	2015-08-30	High	M	Housekeeping	comp63344_c0_seq12	1690
20160901_Still3_0830M02H_02.RCC	0830M02H	2015-08-30	High	M	Housekeeping	comp64151_c1_seq55	1517
20160901_Still3_0830M02H_02.RCC	0830M02H	2015-08-30	High	M	Target	0_0_CCAG28737.b1_CAYC_CAYF_CCAG	2127
20160901_Still3_0830M02H_02.RCC	0830M02H	2015-08-30	High	M	Target	1252_1_CAYC_CAYF_CCAG	897
20160901_Still3_0830M02H_02.RCC	0830M02H	2015-08-30	High	M	Target	13341_0_CCAG36642.b1_CAYC_CAYF_CCAG	1128
20160901_Still3_0830M02H_02.RCC	0830M02H	2015-08-30	High	M	Target	14_5_CAYC_CAYF_CCAG	137
20160901_Still3_0830M02H_02.RCC	0830M02H	2015-08-30	High	M	Target	1432_1_CAYC_CAYF_CCAG	2049
20160901_Still3_0830M02H_02.RCC	0830M02H	2015-08-30	High	M	Target	14392_1_CAYC_CAYF_CCAG	227
20160901_Still3_0830M02H_02.RCC	0830M02H	2015-08-30	High	M	Target	14490_0_CCAG5543.g1_CAYC_CAYF_CCAG	107
20160901_Still3_0830M02H_02.RCC	0830M02H	2015-08-30	High	M	Target	14756_0_CCAG9200.b3_CAYC_CAYF_CCAG	519
20160901_Still3_0830M02H_02.RCC	0830M02H	2015-08-30	High	M	Target	1748_1_CAYC_CAYF_CCAG	4519
20160901_Still3_0830M02H_02.RCC	0830M02H	2015-08-30	High	M	Target	178_9_CAYC_CAYF_CCAG	6675
20160901_Still3_0830M02H_02.RCC	0830M02H	2015-08-30	High	M	Target	1837_1_CAYC_CAYF_CCAG	6979
20160901_Still3_0830M02H_02.RCC	0830M02H	2015-08-30	High	M	Target	2202_1_CAYC_CAYF_CCAG	4515
20160901_Still3_0830M02H_02.RCC	0830M02H	2015-08-30	High	M	Target	2758_1_CAYC_CAYF_CCAG	11303
20160901_Still3_0830M02H_02.RCC	0830M02H	2015-08-30	High	M	Target	3280_1_CAYC_CAYF_CCAG	33
20160901_Still3_0830M02H_02.RCC	0830M02H	2015-08-30	High	M	Target	3280_2_CAYC_CAYF_CCAG	82
20160901_Still3_0830M02H_02.RCC	0830M02H	2015-08-30	High	M	Target	3397_1_CAYC_CAYF_CCAG	2503
20160901_Still3_0830M02H_02.RCC	0830M02H	2015-08-30	High	M	Target	3924_1_CAYC_CAYF_CCAG	1141
20160901_Still3_0830M02H_02.RCC	0830M02H	2015-08-30	High	M	Target	CCAG48604	225542
20160901_Still3_0830M02H_02.RCC	0830M02H	2015-08-30	High	M	Target	comp50435_c1_seq2	55949
20160901_Still3_0830M02H_02.RCC	0830M02H	2015-08-30	High	M	Target	comp55113_c2_seq1	2352
20160901_Still3_0830M02H_02.RCC	0830M02H	2015-08-30	High	M	Target	comp55834_c0_seq3	535
20160901_Still3_0830M02H_02.RCC	0830M02H	2015-08-30	High	M	Target	comp55959_c0_seq1	31629
20160901_Still3_0830M02H_02.RCC	0830M02H	2015-08-30	High	M	Target	comp56496_c0_seq4	49
20160901_Still3_0830M02H_02.RCC	0830M02H	2015-08-30	High	M	Target	comp56747_c2_seq2	2057
20160901_Still3_0830M02H_02.RCC	0830M02H	2015-08-30	High	M	Target	comp57952_c3_seq2	103
20160901_Still3_0830M02H_02.RCC	0830M02H	2015-08-30	High	M	Target	comp59049_c0_seq1	32172
20160901_Still3_0830M02H_02.RCC	0830M02H	2015-08-30	High	M	Target	comp60397_c0_seq1	355
20160901_Still3_0830M02H_02.RCC	0830M02H	2015-08-30	High	M	Target	comp62130_c0_seq4	9275
20160901_Still3_0830M02H_02.RCC	0830M02H	2015-08-30	High	M	Target	comp63155_c0_seq11	22286
20160901_Still3_0830M02H_02.RCC	0830M02H	2015-08-30	High	M	Target	comp64021_c3_seq1	9955
20160901_Still3_0830M02H_02.RCC	0830M02H	2015-08-30	High	M	Target	comp65435_c0_seq8	915
20160901_Still3_0830M02H_02.RCC	0830M02H	2015-08-30	High	M	Target	comp65993_c0_seq6	1455
20160901_Still3_0830M03H_03.RCC	0830M03H	2015-08-30	High	M	Positive	POS_A	13919
20160901_Still3_0830M03H_03.RCC	0830M03H	2015-08-30	High	M	Positive	POS_B	3847
20160901_Still3_0830M03H_03.RCC	0830M03H	2015-08-30	High	M	Positive	POS_C	1032
20160901_Still3_0830M03H_03.RCC	0830M03H	2015-08-30	High	M	Positive	POS_D	302
20160901_Still3_0830M03H_03.RCC	0830M03H	2015-08-30	High	M	Positive	POS_E	84
20160901_Still3_0830M03H_03.RCC	0830M03H	2015-08-30	High	M	Positive	POS_F	49
20160901_Still3_0830M03H_03.RCC	0830M03H	2015-08-30	High	M	Negative	NEG_A	13
20160901_Still3_0830M03H_03.RCC	0830M03H	2015-08-30	High	M	Negative	NEG_B	23
20160901_Still3_0830M03H_03.RCC	0830M03H	2015-08-30	High	M	Negative	NEG_C	10
20160901_Still3_0830M03H_03.RCC	0830M03H	2015-08-30	High	M	Negative	NEG_D	5
20160901_Still3_0830M03H_03.RCC	0830M03H	2015-08-30	High	M	Negative	NEG_E	12
20160901_Still3_0830M03H_03.RCC	0830M03H	2015-08-30	High	M	Negative	NEG_F	75
20160901_Still3_0830M03H_03.RCC	0830M03H	2015-08-30	High	M	Negative	NEG_G	33
20160901_Still3_0830M03H_03.RCC	0830M03H	2015-08-30	High	M	Negative	NEG_H	32
20160901_Still3_0830M03H_03.RCC	0830M03H	2015-08-30	High	M	Housekeeping	15_8	152892
20160901_Still3_0830M03H_03.RCC	0830M03H	2015-08-30	High	M	Housekeeping	187_1_CAYC_CAYF_CCAG	172202
20160901_Still3_0830M03H_03.RCC	0830M03H	2015-08-30	High	M	Housekeeping	comp61175_c0_seq94	737
20160901_Still3_0830M03H_03.RCC	0830M03H	2015-08-30	High	M	Housekeeping	comp61968_c0_seq6	504
20160901_Still3_0830M03H_03.RCC	0830M03H	2015-08-30	High	M	Housekeeping	comp62062_c4_seq7	562
20160901_Still3_0830M03H_03.RCC	0830M03H	2015-08-30	High	M	Housekeeping	comp62406_c1_seq15	765
20160901_Still3_0830M03H_03.RCC	0830M03H	2015-08-30	High	M	Housekeeping	comp63344_c0_seq12	1496
20160901_Still3_0830M03H_03.RCC	0830M03H	2015-08-30	High	M	Housekeeping	comp64151_c1_seq55	1786
20160901_Still3_0830M03H_03.RCC	0830M03H	2015-08-30	High	M	Target	0_0_CCAG28737.b1_CAYC_CAYF_CCAG	1442
20160901_Still3_0830M03H_03.RCC	0830M03H	2015-08-30	High	M	Target	1252_1_CAYC_CAYF_CCAG	1700
20160901_Still3_0830M03H_03.RCC	0830M03H	2015-08-30	High	M	Target	13341_0_CCAG36642.b1_CAYC_CAYF_CCAG	1353
20160901_Still3_0830M03H_03.RCC	0830M03H	2015-08-30	High	M	Target	14_5_CAYC_CAYF_CCAG	2111
20160901_Still3_0830M03H_03.RCC	0830M03H	2015-08-30	High	M	Target	1432_1_CAYC_CAYF_CCAG	2316
20160901_Still3_0830M03H_03.RCC	0830M03H	2015-08-30	High	M	Target	14392_1_CAYC_CAYF_CCAG	240
20160901_Still3_0830M03H_03.RCC	0830M03H	2015-08-30	High	M	Target	14490_0_CCAG5543.g1_CAYC_CAYF_CCAG	138
20160901_Still3_0830M03H_03.RCC	0830M03H	2015-08-30	High	M	Target	14756_0_CCAG9200.b3_CAYC_CAYF_CCAG	358
20160901_Still3_0830M03H_03.RCC	0830M03H	2015-08-30	High	M	Target	1748_1_CAYC_CAYF_CCAG	3951
20160901_Still3_0830M03H_03.RCC	0830M03H	2015-08-30	High	M	Target	178_9_CAYC_CAYF_CCAG	9271
20160901_Still3_0830M03H_03.RCC	0830M03H	2015-08-30	High	M	Target	1837_1_CAYC_CAYF_CCAG	3315
20160901_Still3_0830M03H_03.RCC	0830M03H	2015-08-30	High	M	Target	2202_1_CAYC_CAYF_CCAG	4719
20160901_Still3_0830M03H_03.RCC	0830M03H	2015-08-30	High	M	Target	2758_1_CAYC_CAYF_CCAG	10579
20160901_Still3_0830M03H_03.RCC	0830M03H	2015-08-30	High	M	Target	3280_1_CAYC_CAYF_CCAG	71
20160901_Still3_0830M03H_03.RCC	0830M03H	2015-08-30	High	M	Target	3280_2_CAYC_CAYF_CCAG	88
20160901_Still3_0830M03H_03.RCC	0830M03H	2015-08-30	High	M	Target	3397_1_CAYC_CAYF_CCAG	2660
20160901_Still3_0830M03H_03.RCC	0830M03H	2015-08-30	High	M	Target	3924_1_CAYC_CAYF_CCAG	801
20160901_Still3_0830M03H_03.RCC	0830M03H	2015-08-30	High	M	Target	CCAG48604	293942
20160901_Still3_0830M03H_03.RCC	0830M03H	2015-08-30	High	M	Target	comp50435_c1_seq2	70465
20160901_Still3_0830M03H_03.RCC	0830M03H	2015-08-30	High	M	Target	comp55113_c2_seq1	1991
20160901_Still3_0830M03H_03.RCC	0830M03H	2015-08-30	High	M	Target	comp55834_c0_seq3	327
20160901_Still3_0830M03H_03.RCC	0830M03H	2015-08-30	High	M	Target	comp55959_c0_seq1	24822
20160901_Still3_0830M03H_03.RCC	0830M03H	2015-08-30	High	M	Target	comp56496_c0_seq4	65
20160901_Still3_0830M03H_03.RCC	0830M03H	2015-08-30	High	M	Target	comp56747_c2_seq2	1353
20160901_Still3_0830M03H_03.RCC	0830M03H	2015-08-30	High	M	Target	comp57952_c3_seq2	104
20160901_Still3_0830M03H_03.RCC	0830M03H	2015-08-30	High	M	Target	comp59049_c0_seq1	18654
20160901_Still3_0830M03H_03.RCC	0830M03H	2015-08-30	High	M	Target	comp60397_c0_seq1	653
20160901_Still3_0830M03H_03.RCC	0830M03H	2015-08-30	High	M	Target	comp62130_c0_seq4	7811
20160901_Still3_0830M03H_03.RCC	0830M03H	2015-08-30	High	M	Target	comp63155_c0_seq11	19539
20160901_Still3_0830M03H_03.RCC	0830M03H	2015-08-30	High	M	Target	comp64021_c3_seq1	8551
20160901_Still3_0830M03H_03.RCC	0830M03H	2015-08-30	High	M	Target	comp65435_c0_seq8	656
20160901_Still3_0830M03H_03.RCC	0830M03H	2015-08-30	High	M	Target	comp65993_c0_seq6	1427
20160901_Still3_0830M04H_04.RCC	0830M04H	2015-08-30	High	M	Positive	POS_A	14208
20160901_Still3_0830M04H_04.RCC	0830M04H	2015-08-30	High	M	Positive	POS_B	3955
20160901_Still3_0830M04H_04.RCC	0830M04H	2015-08-30	High	M	Positive	POS_C	1066
20160901_Still3_0830M04H_04.RCC	0830M04H	2015-08-30	High	M	Positive	POS_D	309
20160901_Still3_0830M04H_04.RCC	0830M04H	2015-08-30	High	M	Positive	POS_E	103
20160901_Still3_0830M04H_04.RCC	0830M04H	2015-08-30	High	M	Positive	POS_F	51
20160901_Still3_0830M04H_04.RCC	0830M04H	2015-08-30	High	M	Negative	NEG_A	12
20160901_Still3_0830M04H_04.RCC	0830M04H	2015-08-30	High	M	Negative	NEG_B	48
20160901_Still3_0830M04H_04.RCC	0830M04H	2015-08-30	High	M	Negative	NEG_C	10
20160901_Still3_0830M04H_04.RCC	0830M04H	2015-08-30	High	M	Negative	NEG_D	4
20160901_Still3_0830M04H_04.RCC	0830M04H	2015-08-30	High	M	Negative	NEG_E	19
20160901_Still3_0830M04H_04.RCC	0830M04H	2015-08-30	High	M	Negative	NEG_F	89
20160901_Still3_0830M04H_04.RCC	0830M04H	2015-08-30	High	M	Negative	NEG_G	16
20160901_Still3_0830M04H_04.RCC	0830M04H	2015-08-30	High	M	Negative	NEG_H	19
20160901_Still3_0830M04H_04.RCC	0830M04H	2015-08-30	High	M	Housekeeping	15_8	202394
20160901_Still3_0830M04H_04.RCC	0830M04H	2015-08-30	High	M	Housekeeping	187_1_CAYC_CAYF_CCAG	20878
20160901_Still3_0830M04H_04.RCC	0830M04H	2015-08-30	High	M	Housekeeping	comp61175_c0_seq94	1364
20160901_Still3_0830M04H_04.RCC	0830M04H	2015-08-30	High	M	Housekeeping	comp61968_c0_seq6	840
20160901_Still3_0830M04H_04.RCC	0830M04H	2015-08-30	High	M	Housekeeping	comp62062_c4_seq7	1584
20160901_Still3_0830M04H_04.RCC	0830M04H	2015-08-30	High	M	Housekeeping	comp62406_c1_seq15	1435
20160901_Still3_0830M04H_04.RCC	0830M04H	2015-08-30	High	M	Housekeeping	comp63344_c0_seq12	1617
20160901_Still3_0830M04H_04.RCC	0830M04H	2015-08-30	High	M	Housekeeping	comp64151_c1_seq55	2059
20160901_Still3_0830M04H_04.RCC	0830M04H	2015-08-30	High	M	Target	0_0_CCAG28737.b1_CAYC_CAYF_CCAG	2641
20160901_Still3_0830M04H_04.RCC	0830M04H	2015-08-30	High	M	Target	1252_1_CAYC_CAYF_CCAG	5165
20160901_Still3_0830M04H_04.RCC	0830M04H	2015-08-30	High	M	Target	13341_0_CCAG36642.b1_CAYC_CAYF_CCAG	1329
20160901_Still3_0830M04H_04.RCC	0830M04H	2015-08-30	High	M	Target	14_5_CAYC_CAYF_CCAG	6268
20160901_Still3_0830M04H_04.RCC	0830M04H	2015-08-30	High	M	Target	1432_1_CAYC_CAYF_CCAG	1131
20160901_Still3_0830M04H_04.RCC	0830M04H	2015-08-30	High	M	Target	14392_1_CAYC_CAYF_CCAG	205408
20160901_Still3_0830M04H_04.RCC	0830M04H	2015-08-30	High	M	Target	14490_0_CCAG5543.g1_CAYC_CAYF_CCAG	161
20160901_Still3_0830M04H_04.RCC	0830M04H	2015-08-30	High	M	Target	14756_0_CCAG9200.b3_CAYC_CAYF_CCAG	4
20160901_Still3_0830M04H_04.RCC	0830M04H	2015-08-30	High	M	Target	1748_1_CAYC_CAYF_CCAG	5915
20160901_Still3_0830M04H_04.RCC	0830M04H	2015-08-30	High	M	Target	178_9_CAYC_CAYF_CCAG	24250
20160901_Still3_0830M04H_04.RCC	0830M04H	2015-08-30	High	M	Target	1837_1_CAYC_CAYF_CCAG	19366
20160901_Still3_0830M04H_04.RCC	0830M04H	2015-08-30	High	M	Target	2202_1_CAYC_CAYF_CCAG	15046
20160901_Still3_0830M04H_04.RCC	0830M04H	2015-08-30	High	M	Target	2758_1_CAYC_CAYF_CCAG	12114
20160901_Still3_0830M04H_04.RCC	0830M04H	2015-08-30	High	M	Target	3280_1_CAYC_CAYF_CCAG	13902
20160901_Still3_0830M04H_04.RCC	0830M04H	2015-08-30	High	M	Target	3280_2_CAYC_CAYF_CCAG	14632
20160901_Still3_0830M04H_04.RCC	0830M04H	2015-08-30	High	M	Target	3397_1_CAYC_CAYF_CCAG	2865
20160901_Still3_0830M04H_04.RCC	0830M04H	2015-08-30	High	M	Target	3924_1_CAYC_CAYF_CCAG	127
20160901_Still3_0830M04H_04.RCC	0830M04H	2015-08-30	High	M	Target	CCAG48604	199689
20160901_Still3_0830M04H_04.RCC	0830M04H	2015-08-30	High	M	Target	comp50435_c1_seq2	10211
20160901_Still3_0830M04H_04.RCC	0830M04H	2015-08-30	High	M	Target	comp55113_c2_seq1	16291
20160901_Still3_0830M04H_04.RCC	0830M04H	2015-08-30	High	M	Target	comp55834_c0_seq3	230
20160901_Still3_0830M04H_04.RCC	0830M04H	2015-08-30	High	M	Target	comp55959_c0_seq1	7644
20160901_Still3_0830M04H_04.RCC	0830M04H	2015-08-30	High	M	Target	comp56496_c0_seq4	123
20160901_Still3_0830M04H_04.RCC	0830M04H	2015-08-30	High	M	Target	comp56747_c2_seq2	3470
20160901_Still3_0830M04H_04.RCC	0830M04H	2015-08-30	High	M	Target	comp57952_c3_seq2	83
20160901_Still3_0830M04H_04.RCC	0830M04H	2015-08-30	High	M	Target	comp59049_c0_seq1	91876
20160901_Still3_0830M04H_04.RCC	0830M04H	2015-08-30	High	M	Target	comp60397_c0_seq1	224
20160901_Still3_0830M04H_04.RCC	0830M04H	2015-08-30	High	M	Target	comp62130_c0_seq4	3595
20160901_Still3_0830M04H_04.RCC	0830M04H	2015-08-30	High	M	Target	comp63155_c0_seq11	7443
20160901_Still3_0830M04H_04.RCC	0830M04H	2015-08-30	High	M	Target	comp64021_c3_seq1	6139
20160901_Still3_0830M04H_04.RCC	0830M04H	2015-08-30	High	M	Target	comp65435_c0_seq8	872
20160901_Still3_0830M04H_04.RCC	0830M04H	2015-08-30	High	M	Target	comp65993_c0_seq6	1434
20160901_Still3_0830M05H_05.RCC	0830M05H	2015-08-30	High	M	Positive	POS_A	17022
20160901_Still3_0830M05H_05.RCC	0830M05H	2015-08-30	High	M	Positive	POS_B	4550
20160901_Still3_0830M05H_05.RCC	0830M05H	2015-08-30	High	M	Positive	POS_C	1249
20160901_Still3_0830M05H_05.RCC	0830M05H	2015-08-30	High	M	Positive	POS_D	395
20160901_Still3_0830M05H_05.RCC	0830M05H	2015-08-30	High	M	Positive	POS_E	87
20160901_Still3_0830M05H_05.RCC	0830M05H	2015-08-30	High	M	Positive	POS_F	58
20160901_Still3_0830M05H_05.RCC	0830M05H	2015-08-30	High	M	Negative	NEG_A	25
20160901_Still3_0830M05H_05.RCC	0830M05H	2015-08-30	High	M	Negative	NEG_B	44
20160901_Still3_0830M05H_05.RCC	0830M05H	2015-08-30	High	M	Negative	NEG_C	7
20160901_Still3_0830M05H_05.RCC	0830M05H	2015-08-30	High	M	Negative	NEG_D	10
20160901_Still3_0830M05H_05.RCC	0830M05H	2015-08-30	High	M	Negative	NEG_E	25
20160901_Still3_0830M05H_05.RCC	0830M05H	2015-08-30	High	M	Negative	NEG_F	80
20160901_Still3_0830M05H_05.RCC	0830M05H	2015-08-30	High	M	Negative	NEG_G	14
20160901_Still3_0830M05H_05.RCC	0830M05H	2015-08-30	High	M	Negative	NEG_H	17
20160901_Still3_0830M05H_05.RCC	0830M05H	2015-08-30	High	M	Housekeeping	15_8	203490
20160901_Still3_0830M05H_05.RCC	0830M05H	2015-08-30	High	M	Housekeeping	187_1_CAYC_CAYF_CCAG	23175
20160901_Still3_0830M05H_05.RCC	0830M05H	2015-08-30	High	M	Housekeeping	comp61175_c0_seq94	1298
20160901_Still3_0830M05H_05.RCC	0830M05H	2015-08-30	High	M	Housekeeping	comp61968_c0_seq6	738
20160901_Still3_0830M05H_05.RCC	0830M05H	2015-08-30	High	M	Housekeeping	comp62062_c4_seq7	1156
20160901_Still3_0830M05H_05.RCC	0830M05H	2015-08-30	High	M	Housekeeping	comp62406_c1_seq15	1333
20160901_Still3_0830M05H_05.RCC	0830M05H	2015-08-30	High	M	Housekeeping	comp63344_c0_seq12	1975
20160901_Still3_0830M05H_05.RCC	0830M05H	2015-08-30	High	M	Housekeeping	comp64151_c1_seq55	1816
20160901_Still3_0830M05H_05.RCC	0830M05H	2015-08-30	High	M	Target	0_0_CCAG28737.b1_CAYC_CAYF_CCAG	2238
20160901_Still3_0830M05H_05.RCC	0830M05H	2015-08-30	High	M	Target	1252_1_CAYC_CAYF_CCAG	4185
20160901_Still3_0830M05H_05.RCC	0830M05H	2015-08-30	High	M	Target	13341_0_CCAG36642.b1_CAYC_CAYF_CCAG	1004
20160901_Still3_0830M05H_05.RCC	0830M05H	2015-08-30	High	M	Target	14_5_CAYC_CAYF_CCAG	3146
20160901_Still3_0830M05H_05.RCC	0830M05H	2015-08-30	High	M	Target	1432_1_CAYC_CAYF_CCAG	1009
20160901_Still3_0830M05H_05.RCC	0830M05H	2015-08-30	High	M	Target	14392_1_CAYC_CAYF_CCAG	82484
20160901_Still3_0830M05H_05.RCC	0830M05H	2015-08-30	High	M	Target	14490_0_CCAG5543.g1_CAYC_CAYF_CCAG	140
20160901_Still3_0830M05H_05.RCC	0830M05H	2015-08-30	High	M	Target	14756_0_CCAG9200.b3_CAYC_CAYF_CCAG	9
20160901_Still3_0830M05H_05.RCC	0830M05H	2015-08-30	High	M	Target	1748_1_CAYC_CAYF_CCAG	8563
20160901_Still3_0830M05H_05.RCC	0830M05H	2015-08-30	High	M	Target	178_9_CAYC_CAYF_CCAG	30744
20160901_Still3_0830M05H_05.RCC	0830M05H	2015-08-30	High	M	Target	1837_1_CAYC_CAYF_CCAG	16637
20160901_Still3_0830M05H_05.RCC	0830M05H	2015-08-30	High	M	Target	2202_1_CAYC_CAYF_CCAG	15997
20160901_Still3_0830M05H_05.RCC	0830M05H	2015-08-30	High	M	Target	2758_1_CAYC_CAYF_CCAG	21439
20160901_Still3_0830M05H_05.RCC	0830M05H	2015-08-30	High	M	Target	3280_1_CAYC_CAYF_CCAG	450
20160901_Still3_0830M05H_05.RCC	0830M05H	2015-08-30	High	M	Target	3280_2_CAYC_CAYF_CCAG	514
20160901_Still3_0830M05H_05.RCC	0830M05H	2015-08-30	High	M	Target	3397_1_CAYC_CAYF_CCAG	3632
20160901_Still3_0830M05H_05.RCC	0830M05H	2015-08-30	High	M	Target	3924_1_CAYC_CAYF_CCAG	107
20160901_Still3_0830M05H_05.RCC	0830M05H	2015-08-30	High	M	Target	CCAG48604	270265
20160901_Still3_0830M05H_05.RCC	0830M05H	2015-08-30	High	M	Target	comp50435_c1_seq2	955
20160901_Still3_0830M05H_05.RCC	0830M05H	2015-08-30	High	M	Target	comp55113_c2_seq1	7603
20160901_Still3_0830M05H_05.RCC	0830M05H	2015-08-30	High	M	Target	comp55834_c0_seq3	278
20160901_Still3_0830M05H_05.RCC	0830M05H	2015-08-30	High	M	Target	comp55959_c0_seq1	8820
20160901_Still3_0830M05H_05.RCC	0830M05H	2015-08-30	High	M	Target	comp56496_c0_seq4	89
20160901_Still3_0830M05H_05.RCC	0830M05H	2015-08-30	High	M	Target	comp56747_c2_seq2	3188
20160901_Still3_0830M05H_05.RCC	0830M05H	2015-08-30	High	M	Target	comp57952_c3_seq2	83
20160901_Still3_0830M05H_05.RCC	0830M05H	2015-08-30	High	M	Target	comp59049_c0_seq1	51199
20160901_Still3_0830M05H_05.RCC	0830M05H	2015-08-30	High	M	Target	comp60397_c0_seq1	211
20160901_Still3_0830M05H_05.RCC	0830M05H	2015-08-30	High	M	Target	comp62130_c0_seq4	3397
20160901_Still3_0830M05H_05.RCC	0830M05H	2015-08-30	High	M	Target	comp63155_c0_seq11	7954
20160901_Still3_0830M05H_05.RCC	0830M05H	2015-08-30	High	M	Target	comp64021_c3_seq1	6667
20160901_Still3_0830M05H_05.RCC	0830M05H	2015-08-30	High	M	Target	comp65435_c0_seq8	633
20160901_Still3_0830M05H_05.RCC	0830M05H	2015-08-30	High	M	Target	comp65993_c0_seq6	1593
20160901_Still3_1222F03H_11.RCC	1222F03H	2015-12-22	High	F	Positive	POS_A	6102
20160901_Still3_1222F03H_11.RCC	1222F03H	2015-12-22	High	F	Positive	POS_B	1864
20160901_Still3_1222F03H_11.RCC	1222F03H	2015-12-22	High	F	Positive	POS_C	482
20160901_Still3_1222F03H_11.RCC	1222F03H	2015-12-22	High	F	Positive	POS_D	198
20160901_Still3_1222F03H_11.RCC	1222F03H	2015-12-22	High	F	Positive	POS_E	25
20160901_Still3_1222F03H_11.RCC	1222F03H	2015-12-22	High	F	Positive	POS_F	13
20160901_Still3_1222F03H_11.RCC	1222F03H	2015-12-22	High	F	Negative	NEG_A	10
20160901_Still3_1222F03H_11.RCC	1222F03H	2015-12-22	High	F	Negative	NEG_B	13
20160901_Still3_1222F03H_11.RCC	1222F03H	2015-12-22	High	F	Negative	NEG_C	2
20160901_Still3_1222F03H_11.RCC	1222F03H	2015-12-22	High	F	Negative	NEG_D	1
20160901_Still3_1222F03H_11.RCC	1222F03H	2015-12-22	High	F	Negative	NEG_E	9
20160901_Still3_1222F03H_11.RCC	1222F03H	2015-12-22	High	F	Negative	NEG_F	20
20160901_Still3_1222F03H_11.RCC	1222F03H	2015-12-22	High	F	Negative	NEG_G	29
20160901_Still3_1222F03H_11.RCC	1222F03H	2015-12-22	High	F	Negative	NEG_H	33
20160901_Still3_1222F03H_11.RCC	1222F03H	2015-12-22	High	F	Housekeeping	15_8	43297
20160901_Still3_1222F03H_11.RCC	1222F03H	2015-12-22	High	F	Housekeeping	187_1_CAYC_CAYF_CCAG	5841
20160901_Still3_1222F03H_11.RCC	1222F03H	2015-12-22	High	F	Housekeeping	comp61175_c0_seq94	482
20160901_Still3_1222F03H_11.RCC	1222F03H	2015-12-22	High	F	Housekeeping	comp61968_c0_seq6	220
20160901_Still3_1222F03H_11.RCC	1222F03H	2015-12-22	High	F	Housekeeping	comp62062_c4_seq7	613
20160901_Still3_1222F03H_11.RCC	1222F03H	2015-12-22	High	F	Housekeeping	comp62406_c1_seq15	519
20160901_Still3_1222F03H_11.RCC	1222F03H	2015-12-22	High	F	Housekeeping	comp63344_c0_seq12	718
20160901_Still3_1222F03H_11.RCC	1222F03H	2015-12-22	High	F	Housekeeping	comp64151_c1_seq55	455
20160901_Still3_1222F03H_11.RCC	1222F03H	2015-12-22	High	F	Target	0_0_CCAG28737.b1_CAYC_CAYF_CCAG	899
20160901_Still3_1222F03H_11.RCC	1222F03H	2015-12-22	High	F	Target	1252_1_CAYC_CAYF_CCAG	2168
20160901_Still3_1222F03H_11.RCC	1222F03H	2015-12-22	High	F	Target	13341_0_CCAG36642.b1_CAYC_CAYF_CCAG	329
20160901_Still3_1222F03H_11.RCC	1222F03H	2015-12-22	High	F	Target	14_5_CAYC_CAYF_CCAG	131
20160901_Still3_1222F03H_11.RCC	1222F03H	2015-12-22	High	F	Target	1432_1_CAYC_CAYF_CCAG	354
20160901_Still3_1222F03H_11.RCC	1222F03H	2015-12-22	High	F	Target	14392_1_CAYC_CAYF_CCAG	27000
20160901_Still3_1222F03H_11.RCC	1222F03H	2015-12-22	High	F	Target	14490_0_CCAG5543.g1_CAYC_CAYF_CCAG	126
20160901_Still3_1222F03H_11.RCC	1222F03H	2015-12-22	High	F	Target	14756_0_CCAG9200.b3_CAYC_CAYF_CCAG	4
20160901_Still3_1222F03H_11.RCC	1222F03H	2015-12-22	High	F	Target	1748_1_CAYC_CAYF_CCAG	4118
20160901_Still3_1222F03H_11.RCC	1222F03H	2015-12-22	High	F	Target	178_9_CAYC_CAYF_CCAG	38080
20160901_Still3_1222F03H_11.RCC	1222F03H	2015-12-22	High	F	Target	1837_1_CAYC_CAYF_CCAG	3532
20160901_Still3_1222F03H_11.RCC	1222F03H	2015-12-22	High	F	Target	2202_1_CAYC_CAYF_CCAG	3842
20160901_Still3_1222F03H_11.RCC	1222F03H	2015-12-22	High	F	Target	2758_1_CAYC_CAYF_CCAG	7864
20160901_Still3_1222F03H_11.RCC	1222F03H	2015-12-22	High	F	Target	3280_1_CAYC_CAYF_CCAG	383518
20160901_Still3_1222F03H_11.RCC	1222F03H	2015-12-22	High	F	Target	3280_2_CAYC_CAYF_CCAG	441807
20160901_Still3_1222F03H_11.RCC	1222F03H	2015-12-22	High	F	Target	3397_1_CAYC_CAYF_CCAG	873
20160901_Still3_1222F03H_11.RCC	1222F03H	2015-12-22	High	F	Target	3924_1_CAYC_CAYF_CCAG	47
20160901_Still3_1222F03H_11.RCC	1222F03H	2015-12-22	High	F	Target	CCAG48604	61377
20160901_Still3_1222F03H_11.RCC	1222F03H	2015-12-22	High	F	Target	comp50435_c1_seq2	132
20160901_Still3_1222F03H_11.RCC	1222F03H	2015-12-22	High	F	Target	comp55113_c2_seq1	1699
20160901_Still3_1222F03H_11.RCC	1222F03H	2015-12-22	High	F	Target	comp55834_c0_seq3	289
20160901_Still3_1222F03H_11.RCC	1222F03H	2015-12-22	High	F	Target	comp55959_c0_seq1	2593
20160901_Still3_1222F03H_11.RCC	1222F03H	2015-12-22	High	F	Target	comp56496_c0_seq4	23
20160901_Still3_1222F03H_11.RCC	1222F03H	2015-12-22	High	F	Target	comp56747_c2_seq2	857
20160901_Still3_1222F03H_11.RCC	1222F03H	2015-12-22	High	F	Target	comp57952_c3_seq2	14
20160901_Still3_1222F03H_11.RCC	1222F03H	2015-12-22	High	F	Target	comp59049_c0_seq1	1937
20160901_Still3_1222F03H_11.RCC	1222F03H	2015-12-22	High	F	Target	comp60397_c0_seq1	66
20160901_Still3_1222F03H_11.RCC	1222F03H	2015-12-22	High	F	Target	comp62130_c0_seq4	1012
20160901_Still3_1222F03H_11.RCC	1222F03H	2015-12-22	High	F	Target	comp63155_c0_seq11	2140
20160901_Still3_1222F03H_11.RCC	1222F03H	2015-12-22	High	F	Target	comp64021_c3_seq1	2174
20160901_Still3_1222F03H_11.RCC	1222F03H	2015-12-22	High	F	Target	comp65435_c0_seq8	172
20160901_Still3_1222F03H_11.RCC	1222F03H	2015-12-22	High	F	Target	comp65993_c0_seq6	654
20160901_Still3_1222F03L_12.RCC	1222F03L	2015-12-22	Low	F	Positive	POS_A	13732
20160901_Still3_1222F03L_12.RCC	1222F03L	2015-12-22	Low	F	Positive	POS_B	3893
20160901_Still3_1222F03L_12.RCC	1222F03L	2015-12-22	Low	F	Positive	POS_C	1091
20160901_Still3_1222F03L_12.RCC	1222F03L	2015-12-22	Low	F	Positive	POS_D	329
20160901_Still3_1222F03L_12.RCC	1222F03L	2015-12-22	Low	F	Positive	POS_E	75
20160901_Still3_1222F03L_12.RCC	1222F03L	2015-12-22	Low	F	Positive	POS_F	49
20160901_Still3_1222F03L_12.RCC	1222F03L	2015-12-22	Low	F	Negative	NEG_A	17
20160901_Still3_1222F03L_12.RCC	1222F03L	2015-12-22	Low	F	Negative	NEG_B	26
20160901_Still3_1222F03L_12.RCC	1222F03L	2015-12-22	Low	F	Negative	NEG_C	5
20160901_Still3_1222F03L_12.RCC	1222F03L	2015-12-22	Low	F	Negative	NEG_D	8
20160901_Still3_1222F03L_12.RCC	1222F03L	2015-12-22	Low	F	Negative	NEG_E	18
20160901_Still3_1222F03L_12.RCC	1222F03L	2015-12-22	Low	F	Negative	NEG_F	64
20160901_Still3_1222F03L_12.RCC	1222F03L	2015-12-22	Low	F	Negative	NEG_G	6
20160901_Still3_1222F03L_12.RCC	1222F03L	2015-12-22	Low	F	Negative	NEG_H	11
20160901_Still3_1222F03L_12.RCC	1222F03L	2015-12-22	Low	F	Housekeeping	15_8	95422
20160901_Still3_1222F03L_12.RCC	1222F03L	2015-12-22	Low	F	Housekeeping	187_1_CAYC_CAYF_CCAG	13292
20160901_Still3_1222F03L_12.RCC	1222F03L	2015-12-22	Low	F	Housekeeping	comp61175_c0_seq94	984
20160901_Still3_1222F03L_12.RCC	1222F03L	2015-12-22	Low	F	Housekeeping	comp61968_c0_seq6	575
20160901_Still3_1222F03L_12.RCC	1222F03L	2015-12-22	Low	F	Housekeeping	comp62062_c4_seq7	1161
20160901_Still3_1222F03L_12.RCC	1222F03L	2015-12-22	Low	F	Housekeeping	comp62406_c1_seq15	1289
20160901_Still3_1222F03L_12.RCC	1222F03L	2015-12-22	Low	F	Housekeeping	comp63344_c0_seq12	2085
20160901_Still3_1222F03L_12.RCC	1222F03L	2015-12-22	Low	F	Housekeeping	comp64151_c1_seq55	1609
20160901_Still3_1222F03L_12.RCC	1222F03L	2015-12-22	Low	F	Target	0_0_CCAG28737.b1_CAYC_CAYF_CCAG	1229
20160901_Still3_1222F03L_12.RCC	1222F03L	2015-12-22	Low	F	Target	1252_1_CAYC_CAYF_CCAG	2459
20160901_Still3_1222F03L_12.RCC	1222F03L	2015-12-22	Low	F	Target	13341_0_CCAG36642.b1_CAYC_CAYF_CCAG	680
20160901_Still3_1222F03L_12.RCC	1222F03L	2015-12-22	Low	F	Target	14_5_CAYC_CAYF_CCAG	42
20160901_Still3_1222F03L_12.RCC	1222F03L	2015-12-22	Low	F	Target	1432_1_CAYC_CAYF_CCAG	746
20160901_Still3_1222F03L_12.RCC	1222F03L	2015-12-22	Low	F	Target	14392_1_CAYC_CAYF_CCAG	47356
20160901_Still3_1222F03L_12.RCC	1222F03L	2015-12-22	Low	F	Target	14490_0_CCAG5543.g1_CAYC_CAYF_CCAG	72
20160901_Still3_1222F03L_12.RCC	1222F03L	2015-12-22	Low	F	Target	14756_0_CCAG9200.b3_CAYC_CAYF_CCAG	4
20160901_Still3_1222F03L_12.RCC	1222F03L	2015-12-22	Low	F	Target	1748_1_CAYC_CAYF_CCAG	8449
20160901_Still3_1222F03L_12.RCC	1222F03L	2015-12-22	Low	F	Target	178_9_CAYC_CAYF_CCAG	59165
20160901_Still3_1222F03L_12.RCC	1222F03L	2015-12-22	Low	F	Target	1837_1_CAYC_CAYF_CCAG	10914
20160901_Still3_1222F03L_12.RCC	1222F03L	2015-12-22	Low	F	Target	2202_1_CAYC_CAYF_CCAG	11773
20160901_Still3_1222F03L_12.RCC	1222F03L	2015-12-22	Low	F	Target	2758_1_CAYC_CAYF_CCAG	17097
20160901_Still3_1222F03L_12.RCC	1222F03L	2015-12-22	Low	F	Target	3280_1_CAYC_CAYF_CCAG	62569
20160901_Still3_1222F03L_12.RCC	1222F03L	2015-12-22	Low	F	Target	3280_2_CAYC_CAYF_CCAG	62325
20160901_Still3_1222F03L_12.RCC	1222F03L	2015-12-22	Low	F	Target	3397_1_CAYC_CAYF_CCAG	2345
20160901_Still3_1222F03L_12.RCC	1222F03L	2015-12-22	Low	F	Target	3924_1_CAYC_CAYF_CCAG	98
20160901_Still3_1222F03L_12.RCC	1222F03L	2015-12-22	Low	F	Target	CCAG48604	179665
20160901_Still3_1222F03L_12.RCC	1222F03L	2015-12-22	Low	F	Target	comp50435_c1_seq2	62
20160901_Still3_1222F03L_12.RCC	1222F03L	2015-12-22	Low	F	Target	comp55113_c2_seq1	4249
20160901_Still3_1222F03L_12.RCC	1222F03L	2015-12-22	Low	F	Target	comp55834_c0_seq3	67
20160901_Still3_1222F03L_12.RCC	1222F03L	2015-12-22	Low	F	Target	comp55959_c0_seq1	8275
20160901_Still3_1222F03L_12.RCC	1222F03L	2015-12-22	Low	F	Target	comp56496_c0_seq4	63
20160901_Still3_1222F03L_12.RCC	1222F03L	2015-12-22	Low	F	Target	comp56747_c2_seq2	2353
20160901_Still3_1222F03L_12.RCC	1222F03L	2015-12-22	Low	F	Target	comp57952_c3_seq2	41
20160901_Still3_1222F03L_12.RCC	1222F03L	2015-12-22	Low	F	Target	comp59049_c0_seq1	2078
20160901_Still3_1222F03L_12.RCC	1222F03L	2015-12-22	Low	F	Target	comp60397_c0_seq1	74
20160901_Still3_1222F03L_12.RCC	1222F03L	2015-12-22	Low	F	Target	comp62130_c0_seq4	3292
20160901_Still3_1222F03L_12.RCC	1222F03L	2015-12-22	Low	F	Target	comp63155_c0_seq11	6702
20160901_Still3_1222F03L_12.RCC	1222F03L	2015-12-22	Low	F	Target	comp64021_c3_seq1	5402
20160901_Still3_1222F03L_12.RCC	1222F03L	2015-12-22	Low	F	Target	comp65435_c0_seq8	493
20160901_Still3_1222F03L_12.RCC	1222F03L	2015-12-22	Low	F	Target	comp65993_c0_seq6	1206
20160901_Still4_0830F01L_06.RCC	0830F01L	2015-08-30	Low	F	Positive	POS_A	6757
20160901_Still4_0830F01L_06.RCC	0830F01L	2015-08-30	Low	F	Positive	POS_B	1953
20160901_Still4_0830F01L_06.RCC	0830F01L	2015-08-30	Low	F	Positive	POS_C	569
20160901_Still4_0830F01L_06.RCC	0830F01L	2015-08-30	Low	F	Positive	POS_D	205
20160901_Still4_0830F01L_06.RCC	0830F01L	2015-08-30	Low	F	Positive	POS_E	54
20160901_Still4_0830F01L_06.RCC	0830F01L	2015-08-30	Low	F	Positive	POS_F	28
20160901_Still4_0830F01L_06.RCC	0830F01L	2015-08-30	Low	F	Negative	NEG_A	7
20160901_Still4_0830F01L_06.RCC	0830F01L	2015-08-30	Low	F	Negative	NEG_B	28
20160901_Still4_0830F01L_06.RCC	0830F01L	2015-08-30	Low	F	Negative	NEG_C	3
20160901_Still4_0830F01L_06.RCC	0830F01L	2015-08-30	Low	F	Negative	NEG_D	3
20160901_Still4_0830F01L_06.RCC	0830F01L	2015-08-30	Low	F	Negative	NEG_E	9
20160901_Still4_0830F01L_06.RCC	0830F01L	2015-08-30	Low	F	Negative	NEG_F	74
20160901_Still4_0830F01L_06.RCC	0830F01L	2015-08-30	Low	F	Negative	NEG_G	23
20160901_Still4_0830F01L_06.RCC	0830F01L	2015-08-30	Low	F	Negative	NEG_H	29
20160901_Still4_0830F01L_06.RCC	0830F01L	2015-08-30	Low	F	Housekeeping	15_8	59268
20160901_Still4_0830F01L_06.RCC	0830F01L	2015-08-30	Low	F	Housekeeping	187_1_CAYC_CAYF_CCAG	9629
20160901_Still4_0830F01L_06.RCC	0830F01L	2015-08-30	Low	F	Housekeeping	comp61175_c0_seq94	890
20160901_Still4_0830F01L_06.RCC	0830F01L	2015-08-30	Low	F	Housekeeping	comp61968_c0_seq6	502
20160901_Still4_0830F01L_06.RCC	0830F01L	2015-08-30	Low	F	Housekeeping	comp62062_c4_seq7	977
20160901_Still4_0830F01L_06.RCC	0830F01L	2015-08-30	Low	F	Housekeeping	comp62406_c1_seq15	998
20160901_Still4_0830F01L_06.RCC	0830F01L	2015-08-30	Low	F	Housekeeping	comp63344_c0_seq12	1292
20160901_Still4_0830F01L_06.RCC	0830F01L	2015-08-30	Low	F	Housekeeping	comp64151_c1_seq55	1309
20160901_Still4_0830F01L_06.RCC	0830F01L	2015-08-30	Low	F	Target	0_0_CCAG28737.b1_CAYC_CAYF_CCAG	2100
20160901_Still4_0830F01L_06.RCC	0830F01L	2015-08-30	Low	F	Target	1252_1_CAYC_CAYF_CCAG	3535
20160901_Still4_0830F01L_06.RCC	0830F01L	2015-08-30	Low	F	Target	13341_0_CCAG36642.b1_CAYC_CAYF_CCAG	511
20160901_Still4_0830F01L_06.RCC	0830F01L	2015-08-30	Low	F	Target	14_5_CAYC_CAYF_CCAG	870
20160901_Still4_0830F01L_06.RCC	0830F01L	2015-08-30	Low	F	Target	1432_1_CAYC_CAYF_CCAG	664
20160901_Still4_0830F01L_06.RCC	0830F01L	2015-08-30	Low	F	Target	14392_1_CAYC_CAYF_CCAG	96690
20160901_Still4_0830F01L_06.RCC	0830F01L	2015-08-30	Low	F	Target	14490_0_CCAG5543.g1_CAYC_CAYF_CCAG	122
20160901_Still4_0830F01L_06.RCC	0830F01L	2015-08-30	Low	F	Target	14756_0_CCAG9200.b3_CAYC_CAYF_CCAG	1
20160901_Still4_0830F01L_06.RCC	0830F01L	2015-08-30	Low	F	Target	1748_1_CAYC_CAYF_CCAG	8402
20160901_Still4_0830F01L_06.RCC	0830F01L	2015-08-30	Low	F	Target	178_9_CAYC_CAYF_CCAG	68281
20160901_Still4_0830F01L_06.RCC	0830F01L	2015-08-30	Low	F	Target	1837_1_CAYC_CAYF_CCAG	10910
20160901_Still4_0830F01L_06.RCC	0830F01L	2015-08-30	Low	F	Target	2202_1_CAYC_CAYF_CCAG	10206
20160901_Still4_0830F01L_06.RCC	0830F01L	2015-08-30	Low	F	Target	2758_1_CAYC_CAYF_CCAG	11003
20160901_Still4_0830F01L_06.RCC	0830F01L	2015-08-30	Low	F	Target	3280_1_CAYC_CAYF_CCAG	260429
20160901_Still4_0830F01L_06.RCC	0830F01L	2015-08-30	Low	F	Target	3280_2_CAYC_CAYF_CCAG	279662
20160901_Still4_0830F01L_06.RCC	0830F01L	2015-08-30	Low	F	Target	3397_1_CAYC_CAYF_CCAG	1546
20160901_Still4_0830F01L_06.RCC	0830F01L	2015-08-30	Low	F	Target	3924_1_CAYC_CAYF_CCAG	108
20160901_Still4_0830F01L_06.RCC	0830F01L	2015-08-30	Low	F	Target	CCAG48604	159646
20160901_Still4_0830F01L_06.RCC	0830F01L	2015-08-30	Low	F	Target	comp50435_c1_seq2	125
20160901_Still4_0830F01L_06.RCC	0830F01L	2015-08-30	Low	F	Target	comp55113_c2_seq1	3349
20160901_Still4_0830F01L_06.RCC	0830F01L	2015-08-30	Low	F	Target	comp55834_c0_seq3	179
20160901_Still4_0830F01L_06.RCC	0830F01L	2015-08-30	Low	F	Target	comp55959_c0_seq1	5820
20160901_Still4_0830F01L_06.RCC	0830F01L	2015-08-30	Low	F	Target	comp56496_c0_seq4	72
20160901_Still4_0830F01L_06.RCC	0830F01L	2015-08-30	Low	F	Target	comp56747_c2_seq2	1949
20160901_Still4_0830F01L_06.RCC	0830F01L	2015-08-30	Low	F	Target	comp57952_c3_seq2	69
20160901_Still4_0830F01L_06.RCC	0830F01L	2015-08-30	Low	F	Target	comp59049_c0_seq1	2231
20160901_Still4_0830F01L_06.RCC	0830F01L	2015-08-30	Low	F	Target	comp60397_c0_seq1	65
20160901_Still4_0830F01L_06.RCC	0830F01L	2015-08-30	Low	F	Target	comp62130_c0_seq4	2856
20160901_Still4_0830F01L_06.RCC	0830F01L	2015-08-30	Low	F	Target	comp63155_c0_seq11	5644
20160901_Still4_0830F01L_06.RCC	0830F01L	2015-08-30	Low	F	Target	comp64021_c3_seq1	4570
20160901_Still4_0830F01L_06.RCC	0830F01L	2015-08-30	Low	F	Target	comp65435_c0_seq8	478
20160901_Still4_0830F01L_06.RCC	0830F01L	2015-08-30	Low	F	Target	comp65993_c0_seq6	1068
20160901_Still4_0830F02L_07.RCC	0830F02L	2015-08-30	Low	F	Positive	POS_A	8017
[truncated: 6,857 more rows]

## Sheet: Normalized Data
gene.id	sex	intertidal zone	sampling date	sample	normallized expression
0_0_CCAG28737.b1_CAYC_CAYF_CCAG	F	L	2016-08-02	0802F01L	2238.62
1252_1_CAYC_CAYF_CCAG	F	L	2016-08-02	0802F01L	3203.19
13341_0_CCAG36642.b1_CAYC_CAYF_CCAG	F	L	2016-08-02	0802F01L	609.558
1432_1_CAYC_CAYF_CCAG	F	L	2016-08-02	0802F01L	671.184
14392_1_CAYC_CAYF_CCAG	F	L	2016-08-02	0802F01L	59289.2
14490_0_CCAG5543.g1_CAYC_CAYF_CCAG	F	L	2016-08-02	0802F01L	79.0416
14756_0_CCAG9200.b3_CAYC_CAYF_CCAG	F	L	2016-08-02	0802F01L	2.67938
14_5_CAYC_CAYF_CCAG	F	L	2016-08-02	0802F01L	1638.44
178_9_CAYC_CAYF_CCAG	F	L	2016-08-02	0802F01L	23597.3
1837_1_CAYC_CAYF_CCAG	F	L	2016-08-02	0802F01L	9518.48
2202_1_CAYC_CAYF_CCAG	F	L	2016-08-02	0802F01L	9156.77
2758_1_CAYC_CAYF_CCAG	F	L	2016-08-02	0802F01L	11274.8
3397_1_CAYC_CAYF_CCAG	F	L	2016-08-02	0802F01L	1785.8
3924_1_CAYC_CAYF_CCAG	F	L	2016-08-02	0802F01L	85.74
CCAG48604	F	L	2016-08-02	0802F01L	224229
Vitellogenin_common	F	L	2016-08-02	0802F01L	31394.2
Vitellogenin_unique	F	L	2016-08-02	0802F01L	30842.3
comp50435_c1_seq2	F	L	2016-08-02	0802F01L	242.484
comp55113_c2_seq1	F	L	2016-08-02	0802F01L	8087.7
comp55834_c0_seq3	F	L	2016-08-02	0802F01L	69.6638
comp55959_c0_seq1	F	L	2016-08-02	0802F01L	5136.36
comp56496_c0_seq4	F	L	2016-08-02	0802F01L	73.6828
comp56747_c2_seq2	F	L	2016-08-02	0802F01L	2047.04
comp57952_c3_seq2	F	L	2016-08-02	0802F01L	41.5303
comp59049_c0_seq1	F	L	2016-08-02	0802F01L	16833.2
comp60397_c0_seq1	F	L	2016-08-02	0802F01L	107.175
comp62130_c0_seq4	F	L	2016-08-02	0802F01L	2939.28
comp63155_c0_seq11	F	L	2016-08-02	0802F01L	5925.44
comp64021_c3_seq1	F	L	2016-08-02	0802F01L	3509.98
comp65435_c0_seq8	F	L	2016-08-02	0802F01L	502.383
comp65993_c0_seq6	F	L	2016-08-02	0802F01L	1034.24
vitelline egg coat protein	F	L	2016-08-02	0802F01L	11432.9
0_0_CCAG28737.b1_CAYC_CAYF_CCAG	F	L	2016-08-02	0802F02L	1249.22
1252_1_CAYC_CAYF_CCAG	F	L	2016-08-02	0802F02L	3123.04
13341_0_CCAG36642.b1_CAYC_CAYF_CCAG	F	L	2016-08-02	0802F02L	477.168
1432_1_CAYC_CAYF_CCAG	F	L	2016-08-02	0802F02L	967.74
14392_1_CAYC_CAYF_CCAG	F	L	2016-08-02	0802F02L	54941.4
14490_0_CCAG5543.g1_CAYC_CAYF_CCAG	F	L	2016-08-02	0802F02L	53.6144
14756_0_CCAG9200.b3_CAYC_CAYF_CCAG	F	L	2016-08-02	0802F02L	5.36144
14_5_CAYC_CAYF_CCAG	F	L	2016-08-02	0802F02L	3476.89
178_9_CAYC_CAYF_CCAG	F	L	2016-08-02	0802F02L	15776
1837_1_CAYC_CAYF_CCAG	F	L	2016-08-02	0802F02L	6905.54
2202_1_CAYC_CAYF_CCAG	F	L	2016-08-02	0802F02L	2211.59
2758_1_CAYC_CAYF_CCAG	F	L	2016-08-02	0802F02L	6669.63
3397_1_CAYC_CAYF_CCAG	F	L	2016-08-02	0802F02L	1273.34
3924_1_CAYC_CAYF_CCAG	F	L	2016-08-02	0802F02L	88.4638
CCAG48604	F	L	2016-08-02	0802F02L	90375.1
Vitellogenin_common	F	L	2016-08-02	0802F02L	91.1445
Vitellogenin_unique	F	L	2016-08-02	0802F02L	56.2951
comp50435_c1_seq2	F	L	2016-08-02	0802F02L	21496.7
comp55113_c2_seq1	F	L	2016-08-02	0802F02L	2064.15
comp55834_c0_seq3	F	L	2016-08-02	0802F02L	359.217
comp55959_c0_seq1	F	L	2016-08-02	0802F02L	9696.17
comp56496_c0_seq4	F	L	2016-08-02	0802F02L	32.1686
comp56747_c2_seq2	F	L	2016-08-02	0802F02L	1804.12
comp57952_c3_seq2	F	L	2016-08-02	0802F02L	53.6144
comp59049_c0_seq1	F	L	2016-08-02	0802F02L	41291.1
comp60397_c0_seq1	F	L	2016-08-02	0802F02L	190.331
comp62130_c0_seq4	F	L	2016-08-02	0802F02L	4870.87
comp63155_c0_seq11	F	L	2016-08-02	0802F02L	11473.5
comp64021_c3_seq1	F	L	2016-08-02	0802F02L	4640.33
comp65435_c0_seq8	F	L	2016-08-02	0802F02L	514.698
comp65993_c0_seq6	F	L	2016-08-02	0802F02L	600.481
vitelline egg coat protein	F	L	2016-08-02	0802F02L	4970.06
0_0_CCAG28737.b1_CAYC_CAYF_CCAG	F	L	2016-08-02	0802F03L	1819.64
1252_1_CAYC_CAYF_CCAG	F	L	2016-08-02	0802F03L	1617.45
13341_0_CCAG36642.b1_CAYC_CAYF_CCAG	F	L	2016-08-02	0802F03L	465.339
1432_1_CAYC_CAYF_CCAG	F	L	2016-08-02	0802F03L	654.684
14392_1_CAYC_CAYF_CCAG	F	L	2016-08-02	0802F03L	39377.3
14490_0_CCAG5543.g1_CAYC_CAYF_CCAG	F	L	2016-08-02	0802F03L	73.8124
14756_0_CCAG9200.b3_CAYC_CAYF_CCAG	F	L	2016-08-02	0802F03L	3.20924
14_5_CAYC_CAYF_CCAG	F	L	2016-08-02	0802F03L	1479.46
178_9_CAYC_CAYF_CCAG	F	L	2016-08-02	0802F03L	16001.2
1837_1_CAYC_CAYF_CCAG	F	L	2016-08-02	0802F03L	6306.15
2202_1_CAYC_CAYF_CCAG	F	L	2016-08-02	0802F03L	2820.92
2758_1_CAYC_CAYF_CCAG	F	L	2016-08-02	0802F03L	9133.48
3397_1_CAYC_CAYF_CCAG	F	L	2016-08-02	0802F03L	1864.57
3924_1_CAYC_CAYF_CCAG	F	L	2016-08-02	0802F03L	44.9293
CCAG48604	F	L	2016-08-02	0802F03L	97746.9
Vitellogenin_common	F	L	2016-08-02	0802F03L	105.905
Vitellogenin_unique	F	L	2016-08-02	0802F03L	93.0678
comp50435_c1_seq2	F	L	2016-08-02	0802F03L	30551.9
comp55113_c2_seq1	F	L	2016-08-02	0802F03L	1854.94
comp55834_c0_seq3	F	L	2016-08-02	0802F03L	577.662
comp55959_c0_seq1	F	L	2016-08-02	0802F03L	11039.8
comp56496_c0_seq4	F	L	2016-08-02	0802F03L	51.3478
comp56747_c2_seq2	F	L	2016-08-02	0802F03L	2278.56
comp57952_c3_seq2	F	L	2016-08-02	0802F03L	128.369
comp59049_c0_seq1	F	L	2016-08-02	0802F03L	33709.8
comp60397_c0_seq1	F	L	2016-08-02	0802F03L	157.253
comp62130_c0_seq4	F	L	2016-08-02	0802F03L	4775.34
comp63155_c0_seq11	F	L	2016-08-02	0802F03L	8751.58
comp64021_c3_seq1	F	L	2016-08-02	0802F03L	4707.95
comp65435_c0_seq8	F	L	2016-08-02	0802F03L	526.315
comp65993_c0_seq6	F	L	2016-08-02	0802F03L	783.053
vitelline egg coat protein	F	L	2016-08-02	0802F03L	5105.89
0_0_CCAG28737.b1_CAYC_CAYF_CCAG	F	L	2016-08-02	0802F04L	1078.91
1252_1_CAYC_CAYF_CCAG	F	L	2016-08-02	0802F04L	2102.92
13341_0_CCAG36642.b1_CAYC_CAYF_CCAG	F	L	2016-08-02	0802F04L	432.83
1432_1_CAYC_CAYF_CCAG	F	L	2016-08-02	0802F04L	460.278
14392_1_CAYC_CAYF_CCAG	F	L	2016-08-02	0802F04L	27403.4
14490_0_CCAG5543.g1_CAYC_CAYF_CCAG	F	L	2016-08-02	0802F04L	19.0023
14756_0_CCAG9200.b3_CAYC_CAYF_CCAG	F	L	2016-08-02	0802F04L	6.3341
14_5_CAYC_CAYF_CCAG	F	L	2016-08-02	0802F04L	1328.05
178_9_CAYC_CAYF_CCAG	F	L	2016-08-02	0802F04L	40768.4
1837_1_CAYC_CAYF_CCAG	F	L	2016-08-02	0802F04L	8287.11
2202_1_CAYC_CAYF_CCAG	F	L	2016-08-02	0802F04L	1887.56
2758_1_CAYC_CAYF_CCAG	F	L	2016-08-02	0802F04L	8282.89
3397_1_CAYC_CAYF_CCAG	F	L	2016-08-02	0802F04L	1648.98
3924_1_CAYC_CAYF_CCAG	F	L	2016-08-02	0802F04L	27.4478
CCAG48604	F	L	2016-08-02	0802F04L	73133.5
Vitellogenin_common	F	L	2016-08-02	0802F04L	57.0069
Vitellogenin_unique	F	L	2016-08-02	0802F04L	40.116
comp50435_c1_seq2	F	L	2016-08-02	0802F04L	485.614
comp55113_c2_seq1	F	L	2016-08-02	0802F04L	2814.45
comp55834_c0_seq3	F	L	2016-08-02	0802F04L	122.459
comp55959_c0_seq1	F	L	2016-08-02	0802F04L	5574.01
comp56496_c0_seq4	F	L	2016-08-02	0802F04L	29.5591
comp56747_c2_seq2	F	L	2016-08-02	0802F04L	2111.37
comp57952_c3_seq2	F	L	2016-08-02	0802F04L	82.3433
comp59049_c0_seq1	F	L	2016-08-02	0802F04L	1395.61
comp60397_c0_seq1	F	L	2016-08-02	0802F04L	128.793
comp62130_c0_seq4	F	L	2016-08-02	0802F04L	2890.46
comp63155_c0_seq11	F	L	2016-08-02	0802F04L	4024.26
comp64021_c3_seq1	F	L	2016-08-02	0802F04L	5225.63
comp65435_c0_seq8	F	L	2016-08-02	0802F04L	458.166
comp65993_c0_seq6	F	L	2016-08-02	0802F04L	1053.57
vitelline egg coat protein	F	L	2016-08-02	0802F04L	6973.84
0_0_CCAG28737.b1_CAYC_CAYF_CCAG	F	L	2016-08-02	0802F05L	2085.27
1252_1_CAYC_CAYF_CCAG	F	L	2016-08-02	0802F05L	6323.29
13341_0_CCAG36642.b1_CAYC_CAYF_CCAG	F	L	2016-08-02	0802F05L	931.785
1432_1_CAYC_CAYF_CCAG	F	L	2016-08-02	0802F05L	790.411
14392_1_CAYC_CAYF_CCAG	F	L	2016-08-02	0802F05L	91536.6
14490_0_CCAG5543.g1_CAYC_CAYF_CCAG	F	L	2016-08-02	0802F05L	77.1133
14756_0_CCAG9200.b3_CAYC_CAYF_CCAG	F	L	2016-08-02	0802F05L	3.21305
14_5_CAYC_CAYF_CCAG	F	L	2016-08-02	0802F05L	5526.45
178_9_CAYC_CAYF_CCAG	F	L	2016-08-02	0802F05L	13944.6
1837_1_CAYC_CAYF_CCAG	F	L	2016-08-02	0802F05L	12485.9
2202_1_CAYC_CAYF_CCAG	F	L	2016-08-02	0802F05L	7290.42
2758_1_CAYC_CAYF_CCAG	F	L	2016-08-02	0802F05L	8890.52
3397_1_CAYC_CAYF_CCAG	F	L	2016-08-02	0802F05L	2136.68
3924_1_CAYC_CAYF_CCAG	F	L	2016-08-02	0802F05L	83.5394
CCAG48604	F	L	2016-08-02	0802F05L	143068
Vitellogenin_common	F	L	2016-08-02	0802F05L	581.562
Vitellogenin_unique	F	L	2016-08-02	0802F05L	600.841
comp50435_c1_seq2	F	L	2016-08-02	0802F05L	1510.13
comp55113_c2_seq1	F	L	2016-08-02	0802F05L	6403.61
comp55834_c0_seq3	F	L	2016-08-02	0802F05L	160.653
comp55959_c0_seq1	F	L	2016-08-02	0802F05L	5369.01
comp56496_c0_seq4	F	L	2016-08-02	0802F05L	67.4741
comp56747_c2_seq2	F	L	2016-08-02	0802F05L	2284.48
comp57952_c3_seq2	F	L	2016-08-02	0802F05L	35.3436
comp59049_c0_seq1	F	L	2016-08-02	0802F05L	37650.5
comp60397_c0_seq1	F	L	2016-08-02	0802F05L	186.357
comp62130_c0_seq4	F	L	2016-08-02	0802F05L	2168.81
comp63155_c0_seq11	F	L	2016-08-02	0802F05L	5516.81
comp64021_c3_seq1	F	L	2016-08-02	0802F05L	2907.81
comp65435_c0_seq8	F	L	2016-08-02	0802F05L	507.662
comp65993_c0_seq6	F	L	2016-08-02	0802F05L	1012.11
vitelline egg coat protein	F	L	2016-08-02	0802F05L	8218.99
0_0_CCAG28737.b1_CAYC_CAYF_CCAG	M	L	2016-08-02	0802M01L	2153.11
1252_1_CAYC_CAYF_CCAG	M	L	2016-08-02	0802M01L	913.372
13341_0_CCAG36642.b1_CAYC_CAYF_CCAG	M	L	2016-08-02	0802M01L	451.02
1432_1_CAYC_CAYF_CCAG	M	L	2016-08-02	0802M01L	335.432
14392_1_CAYC_CAYF_CCAG	M	L	2016-08-02	0802M01L	101.989
14490_0_CCAG5543.g1_CAYC_CAYF_CCAG	M	L	2016-08-02	0802M01L	43.0622
14756_0_CCAG9200.b3_CAYC_CAYF_CCAG	M	L	2016-08-02	0802M01L	237.975
14_5_CAYC_CAYF_CCAG	M	L	2016-08-02	0802M01L	446.487
178_9_CAYC_CAYF_CCAG	M	L	2016-08-02	0802M01L	87463.9
1837_1_CAYC_CAYF_CCAG	M	L	2016-08-02	0802M01L	7340.97
2202_1_CAYC_CAYF_CCAG	M	L	2016-08-02	0802M01L	3658.02
2758_1_CAYC_CAYF_CCAG	M	L	2016-08-02	0802M01L	13505.7
3397_1_CAYC_CAYF_CCAG	M	L	2016-08-02	0802M01L	1933.27
3924_1_CAYC_CAYF_CCAG	M	L	2016-08-02	0802M01L	618.736
CCAG48604	M	L	2016-08-02	0802M01L	164380
Vitellogenin_common	M	L	2016-08-02	0802M01L	36.2629
Vitellogenin_unique	M	L	2016-08-02	0802M01L	24.9307
comp50435_c1_seq2	M	L	2016-08-02	0802M01L	70.2594
comp55113_c2_seq1	M	L	2016-08-02	0802M01L	4782.17
comp55834_c0_seq3	M	L	2016-08-02	0802M01L	13.5986
comp55959_c0_seq1	M	L	2016-08-02	0802M01L	6783.43
comp56496_c0_seq4	M	L	2016-08-02	0802M01L	47.5951
comp56747_c2_seq2	M	L	2016-08-02	0802M01L	1874.34
comp57952_c3_seq2	M	L	2016-08-02	0802M01L	40.7958
comp59049_c0_seq1	M	L	2016-08-02	0802M01L	172.249
comp60397_c0_seq1	M	L	2016-08-02	0802M01L	126.92
comp62130_c0_seq4	M	L	2016-08-02	0802M01L	3123.14
comp63155_c0_seq11	M	L	2016-08-02	0802M01L	5530.09
comp64021_c3_seq1	M	L	2016-08-02	0802M01L	3318.06
comp65435_c0_seq8	M	L	2016-08-02	0802M01L	383.027
comp65993_c0_seq6	M	L	2016-08-02	0802M01L	1092.42
vitelline egg coat protein	M	L	2016-08-02	0802M01L	14301.2
0_0_CCAG28737.b1_CAYC_CAYF_CCAG	M	L	2016-08-02	0802M02L	2506.65
1252_1_CAYC_CAYF_CCAG	M	L	2016-08-02	0802M02L	2904.21
13341_0_CCAG36642.b1_CAYC_CAYF_CCAG	M	L	2016-08-02	0802M02L	720.064
1432_1_CAYC_CAYF_CCAG	M	L	2016-08-02	0802M02L	657.797
14392_1_CAYC_CAYF_CCAG	M	L	2016-08-02	0802M02L	229.91
14490_0_CCAG5543.g1_CAYC_CAYF_CCAG	M	L	2016-08-02	0802M02L	114.955
14756_0_CCAG9200.b3_CAYC_CAYF_CCAG	M	L	2016-08-02	0802M02L	145.29
14_5_CAYC_CAYF_CCAG	M	L	2016-08-02	0802M02L	6499.74
178_9_CAYC_CAYF_CCAG	M	L	2016-08-02	0802M02L	17182.6
1837_1_CAYC_CAYF_CCAG	M	L	2016-08-02	0802M02L	10267.7
2202_1_CAYC_CAYF_CCAG	M	L	2016-08-02	0802M02L	8781.27
2758_1_CAYC_CAYF_CCAG	M	L	2016-08-02	0802M02L	11538.6
3397_1_CAYC_CAYF_CCAG	M	L	2016-08-02	0802M02L	2236.83
3924_1_CAYC_CAYF_CCAG	M	L	2016-08-02	0802M02L	443.853
CCAG48604	M	L	2016-08-02	0802M02L	180795
Vitellogenin_common	M	L	2016-08-02	0802M02L	70.2502
Vitellogenin_unique	M	L	2016-08-02	0802M02L	44.7047
comp50435_c1_seq2	M	L	2016-08-02	0802M02L	2849.92
comp55113_c2_seq1	M	L	2016-08-02	0802M02L	5362.96
comp55834_c0_seq3	M	L	2016-08-02	0802M02L	258.648
comp55959_c0_seq1	M	L	2016-08-02	0802M02L	4631.72
comp56496_c0_seq4	M	L	2016-08-02	0802M02L	38.3183
comp56747_c2_seq2	M	L	2016-08-02	0802M02L	1673.23
comp57952_c3_seq2	M	L	2016-08-02	0802M02L	36.7217
comp59049_c0_seq1	M	L	2016-08-02	0802M02L	47339
comp60397_c0_seq1	M	L	2016-08-02	0802M02L	138.904
comp62130_c0_seq4	M	L	2016-08-02	0802M02L	2093.14
comp63155_c0_seq11	M	L	2016-08-02	0802M02L	5117.09
comp64021_c3_seq1	M	L	2016-08-02	0802M02L	3293.78
comp65435_c0_seq8	M	L	2016-08-02	0802M02L	359.234
comp65993_c0_seq6	M	L	2016-08-02	0802M02L	1769.03
vitelline egg coat protein	M	L	2016-08-02	0802M02L	8928.16
0_0_CCAG28737.b1_CAYC_CAYF_CCAG	M	L	2016-08-02	0802M03L	2619.04
1252_1_CAYC_CAYF_CCAG	M	L	2016-08-02	0802M03L	1963.87
13341_0_CCAG36642.b1_CAYC_CAYF_CCAG	M	L	2016-08-02	0802M03L	478.274
1432_1_CAYC_CAYF_CCAG	M	L	2016-08-02	0802M03L	507.756
14392_1_CAYC_CAYF_CCAG	M	L	2016-08-02	0802M03L	173.62
14490_0_CCAG5543.g1_CAYC_CAYF_CCAG	M	L	2016-08-02	0802M03L	101.551
14756_0_CCAG9200.b3_CAYC_CAYF_CCAG	M	L	2016-08-02	0802M03L	556.894
14_5_CAYC_CAYF_CCAG	M	L	2016-08-02	0802M03L	894.306
178_9_CAYC_CAYF_CCAG	M	L	2016-08-02	0802M03L	102441
1837_1_CAYC_CAYF_CCAG	M	L	2016-08-02	0802M03L	12045.3
2202_1_CAYC_CAYF_CCAG	M	L	2016-08-02	0802M03L	6600.83
2758_1_CAYC_CAYF_CCAG	M	L	2016-08-02	0802M03L	11843.8
3397_1_CAYC_CAYF_CCAG	M	L	2016-08-02	0802M03L	1780.42
3924_1_CAYC_CAYF_CCAG	M	L	2016-08-02	0802M03L	1443.01
CCAG48604	M	L	2016-08-02	0802M03L	201325
Vitellogenin_common	M	L	2016-08-02	0802M03L	42.586
Vitellogenin_unique	M	L	2016-08-02	0802M03L	18.0172
comp50435_c1_seq2	M	L	2016-08-02	0802M03L	265.344
comp55113_c2_seq1	M	L	2016-08-02	0802M03L	5054.63
comp55834_c0_seq3	M	L	2016-08-02	0802M03L	37.6722
comp55959_c0_seq1	M	L	2016-08-02	0802M03L	4951.44
comp56496_c0_seq4	M	L	2016-08-02	0802M03L	73.7066
comp56747_c2_seq2	M	L	2016-08-02	0802M03L	1909.82
comp57952_c3_seq2	M	L	2016-08-02	0802M03L	58.9653
comp59049_c0_seq1	M	L	2016-08-02	0802M03L	3742.66
comp60397_c0_seq1	M	L	2016-08-02	0802M03L	85.172
comp62130_c0_seq4	M	L	2016-08-02	0802M03L	2442.14
comp63155_c0_seq11	M	L	2016-08-02	0802M03L	5162.74
comp64021_c3_seq1	M	L	2016-08-02	0802M03L	4044.03
comp65435_c0_seq8	M	L	2016-08-02	0802M03L	379.998
comp65993_c0_seq6	M	L	2016-08-02	0802M03L	1212.06
vitelline egg coat protein	M	L	2016-08-02	0802M03L	14711.8
0_0_CCAG28737.b1_CAYC_CAYF_CCAG	M	L	2016-08-02	0802M04L	3995.68
1252_1_CAYC_CAYF_CCAG	M	L	2016-08-02	0802M04L	1389.34
13341_0_CCAG36642.b1_CAYC_CAYF_CCAG	M	L	2016-08-02	0802M04L	479.229
1432_1_CAYC_CAYF_CCAG	M	L	2016-08-02	0802M04L	563.305
14392_1_CAYC_CAYF_CCAG	M	L	2016-08-02	0802M04L	199.679
14490_0_CCAG5543.g1_CAYC_CAYF_CCAG	M	L	2016-08-02	0802M04L	65.1584
14756_0_CCAG9200.b3_CAYC_CAYF_CCAG	M	L	2016-08-02	0802M04L	212.29
14_5_CAYC_CAYF_CCAG	M	L	2016-08-02	0802M04L	918.523
178_9_CAYC_CAYF_CCAG	M	L	2016-08-02	0802M04L	105792
1837_1_CAYC_CAYF_CCAG	M	L	2016-08-02	0802M04L	10915.1
2202_1_CAYC_CAYF_CCAG	M	L	2016-08-02	0802M04L	8830.01
2758_1_CAYC_CAYF_CCAG	M	L	2016-08-02	0802M04L	12214
3397_1_CAYC_CAYF_CCAG	M	L	2016-08-02	0802M04L	1563.8
3924_1_CAYC_CAYF_CCAG	M	L	2016-08-02	0802M04L	538.082
CCAG48604	M	L	2016-08-02	0802M04L	248380
Vitellogenin_common	M	L	2016-08-02	0802M04L	56.7508
Vitellogenin_unique	M	L	2016-08-02	0802M04L	27.3245
comp50435_c1_seq2	M	L	2016-08-02	0802M04L	136.622
comp55113_c2_seq1	M	L	2016-08-02	0802M04L	6078.65
comp55834_c0_seq3	M	L	2016-08-02	0802M04L	35.732
comp55959_c0_seq1	M	L	2016-08-02	0802M04L	5580.5
comp56496_c0_seq4	M	L	2016-08-02	0802M04L	73.5659
comp56747_c2_seq2	M	L	2016-08-02	0802M04L	1958.95
comp57952_c3_seq2	M	L	2016-08-02	0802M04L	71.464
comp59049_c0_seq1	M	L	2016-08-02	0802M04L	2566.4
comp60397_c0_seq1	M	L	2016-08-02	0802M04L	105.094
comp62130_c0_seq4	M	L	2016-08-02	0802M04L	2822.83
comp63155_c0_seq11	M	L	2016-08-02	0802M04L	5111.78
comp64021_c3_seq1	M	L	2016-08-02	0802M04L	4762.87
comp65435_c0_seq8	M	L	2016-08-02	0802M04L	325.792
comp65993_c0_seq6	M	L	2016-08-02	0802M04L	1202.28
vitelline egg coat protein	M	L	2016-08-02	0802M04L	17388.9
0_0_CCAG28737.b1_CAYC_CAYF_CCAG	M	L	2016-08-02	0802M05L	1748.84
1252_1_CAYC_CAYF_CCAG	M	L	2016-08-02	0802M05L	1840.05
13341_0_CCAG36642.b1_CAYC_CAYF_CCAG	M	L	2016-08-02	0802M05L	432.254
1432_1_CAYC_CAYF_CCAG	M	L	2016-08-02	0802M05L	594.845
14392_1_CAYC_CAYF_CCAG	M	L	2016-08-02	0802M05L	109.055
14490_0_CCAG5543.g1_CAYC_CAYF_CCAG	M	L	2016-08-02	0802M05L	69.3986
14756_0_CCAG9200.b3_CAYC_CAYF_CCAG	M	L	2016-08-02	0802M05L	160.608
14_5_CAYC_CAYF_CCAG	M	L	2016-08-02	0802M05L	35.6907
178_9_CAYC_CAYF_CCAG	M	L	2016-08-02	0802M05L	99456.1
1837_1_CAYC_CAYF_CCAG	M	L	2016-08-02	0802M05L	13717.1
2202_1_CAYC_CAYF_CCAG	M	L	2016-08-02	0802M05L	5050.24
2758_1_CAYC_CAYF_CCAG	M	L	2016-08-02	0802M05L	13554.5
3397_1_CAYC_CAYF_CCAG	M	L	2016-08-02	0802M05L	1717.12
3924_1_CAYC_CAYF_CCAG	M	L	2016-08-02	0802M05L	501.653
CCAG48604	M	L	2016-08-02	0802M05L	149728
Vitellogenin_common	M	L	2016-08-02	0802M05L	17.8454
Vitellogenin_unique	M	L	2016-08-02	0802M05L	29.7423
comp50435_c1_seq2	M	L	2016-08-02	0802M05L	81.2955
comp55113_c2_seq1	M	L	2016-08-02	0802M05L	4955.06
comp55834_c0_seq3	M	L	2016-08-02	0802M05L	31.7251
comp55959_c0_seq1	M	L	2016-08-02	0802M05L	4556.51
comp56496_c0_seq4	M	L	2016-08-02	0802M05L	81.2955
comp56747_c2_seq2	M	L	2016-08-02	0802M05L	2270.33
comp57952_c3_seq2	M	L	2016-08-02	0802M05L	53.5361
comp59049_c0_seq1	M	L	2016-08-02	0802M05L	1435.56
comp60397_c0_seq1	M	L	2016-08-02	0802M05L	128.883
comp62130_c0_seq4	M	L	2016-08-02	0802M05L	2417.05
comp63155_c0_seq11	M	L	2016-08-02	0802M05L	4584.27
comp64021_c3_seq1	M	L	2016-08-02	0802M05L	3396.57
comp65435_c0_seq8	M	L	2016-08-02	0802M05L	438.203
comp65993_c0_seq6	M	L	2016-08-02	0802M05L	1023.13
vitelline egg coat protein	M	L	2016-08-02	0802M05L	13177.8
0_0_CCAG28737.b1_CAYC_CAYF_CCAG	F	H	2016-12-22	1222F01H	1153.89
1252_1_CAYC_CAYF_CCAG	F	H	2016-12-22	1222F01H	4781.78
13341_0_CCAG36642.b1_CAYC_CAYF_CCAG	F	H	2016-12-22	1222F01H	659.519
1432_1_CAYC_CAYF_CCAG	F	H	2016-12-22	1222F01H	679.763
14392_1_CAYC_CAYF_CCAG	F	H	2016-12-22	1222F01H	88841.1
14490_0_CCAG5543.g1_CAYC_CAYF_CCAG	F	H	2016-12-22	1222F01H	109.742
14756_0_CCAG9200.b3_CAYC_CAYF_CCAG	F	H	2016-12-22	1222F01H	2.13092
14_5_CAYC_CAYF_CCAG	F	H	2016-12-22	1222F01H	904.574
178_9_CAYC_CAYF_CCAG	F	H	2016-12-22	1222F01H	49765.4
1837_1_CAYC_CAYF_CCAG	F	H	2016-12-22	1222F01H	14269.7
2202_1_CAYC_CAYF_CCAG	F	H	2016-12-22	1222F01H	7743.75
2758_1_CAYC_CAYF_CCAG	F	H	2016-12-22	1222F01H	13318.2
3397_1_CAYC_CAYF_CCAG	F	H	2016-12-22	1222F01H	1652.53
3924_1_CAYC_CAYF_CCAG	F	H	2016-12-22	1222F01H	91.6294
CCAG48604	F	H	2016-12-22	1222F01H	119653
Vitellogenin_common	F	H	2016-12-22	1222F01H	359777
Vitellogenin_unique	F	H	2016-12-22	1222F01H	348515
comp50435_c1_seq2	F	H	2016-12-22	1222F01H	125.724
comp55113_c2_seq1	F	H	2016-12-22	1222F01H	2663.65
comp55834_c0_seq3	F	H	2016-12-22	1222F01H	191.783
comp55959_c0_seq1	F	H	2016-12-22	1222F01H	5650.13
comp56496_c0_seq4	F	H	2016-12-22	1222F01H	52.2075
comp56747_c2_seq2	F	H	2016-12-22	1222F01H	2800.02
comp57952_c3_seq2	F	H	2016-12-22	1222F01H	44.7493
comp59049_c0_seq1	F	H	2016-12-22	1222F01H	1924.22
comp60397_c0_seq1	F	H	2016-12-22	1222F01H	76.713
comp62130_c0_seq4	F	H	2016-12-22	1222F01H	2647.66
comp63155_c0_seq11	F	H	2016-12-22	1222F01H	4632.61
comp64021_c3_seq1	F	H	2016-12-22	1222F01H	4149.96
comp65435_c0_seq8	F	H	2016-12-22	1222F01H	641.406
comp65993_c0_seq6	F	H	2016-12-22	1222F01H	1062.26
vitelline egg coat protein	F	H	2016-12-22	1222F01H	5392.29
0_0_CCAG28737.b1_CAYC_CAYF_CCAG	F	L	2016-12-22	1222F01L	1181.75
1252_1_CAYC_CAYF_CCAG	F	L	2016-12-22	1222F01L	2223.22
13341_0_CCAG36642.b1_CAYC_CAYF_CCAG	F	L	2016-12-22	1222F01L	589.088
1432_1_CAYC_CAYF_CCAG	F	L	2016-12-22	1222F01L	573.341
14392_1_CAYC_CAYF_CCAG	F	L	2016-12-22	1222F01L	38815.4
14490_0_CCAG5543.g1_CAYC_CAYF_CCAG	F	L	2016-12-22	1222F01L	64.4203
14756_0_CCAG9200.b3_CAYC_CAYF_CCAG	F	L	2016-12-22	1222F01L	1.43156
14_5_CAYC_CAYF_CCAG	F	L	2016-12-22	1222F01L	941.968
178_9_CAYC_CAYF_CCAG	F	L	2016-12-22	1222F01L	72676.8
1837_1_CAYC_CAYF_CCAG	F	L	2016-12-22	1222F01L	12442.4
2202_1_CAYC_CAYF_CCAG	F	L	2016-12-22	1222F01L	7552.21
2758_1_CAYC_CAYF_CCAG	F	L	2016-12-22	1222F01L	16786.5
3397_1_CAYC_CAYF_CCAG	F	L	2016-12-22	1222F01L	2074.33
3924_1_CAYC_CAYF_CCAG	F	L	2016-12-22	1222F01L	83.0306
CCAG48604	F	L	2016-12-22	1222F01L	137149
Vitellogenin_common	F	L	2016-12-22	1222F01L	27672.1
Vitellogenin_unique	F	L	2016-12-22	1222F01L	25755.2
comp50435_c1_seq2	F	L	2016-12-22	1222F01L	71.5781
comp55113_c2_seq1	F	L	2016-12-22	1222F01L	4149.38
comp55834_c0_seq3	F	L	2016-12-22	1222F01L	42.9469
comp55959_c0_seq1	F	L	2016-12-22	1222F01L	5556.61
comp56496_c0_seq4	F	L	2016-12-22	1222F01L	37.9364
comp56747_c2_seq2	F	L	2016-12-22	1222F01L	2224.65
comp57952_c3_seq2	F	L	2016-12-22	1222F01L	46.5258
comp59049_c0_seq1	F	L	2016-12-22	1222F01L	2389.28
comp60397_c0_seq1	F	L	2016-12-22	1222F01L	73.7255
comp62130_c0_seq4	F	L	2016-12-22	1222F01L	2315.55
comp63155_c0_seq11	F	L	2016-12-22	1222F01L	5470
comp64021_c3_seq1	F	L	2016-12-22	1222F01L	3959.7
comp65435_c0_seq8	F	L	2016-12-22	1222F01L	503.194
comp65993_c0_seq6	F	L	2016-12-22	1222F01L	936.958
vitelline egg coat protein	F	L	2016-12-22	1222F01L	8980.91
0_0_CCAG28737.b1_CAYC_CAYF_CCAG	F	H	2016-08-02	0802F01H	1618
1252_1_CAYC_CAYF_CCAG	F	H	2016-08-02	0802F01H	3580.25
13341_0_CCAG36642.b1_CAYC_CAYF_CCAG	F	H	2016-08-02	0802F01H	589.058
1432_1_CAYC_CAYF_CCAG	F	H	2016-08-02	0802F01H	707.635
14392_1_CAYC_CAYF_CCAG	F	H	2016-08-02	0802F01H	68816.5
14490_0_CCAG5543.g1_CAYC_CAYF_CCAG	F	H	2016-08-02	0802F01H	72.676
14756_0_CCAG9200.b3_CAYC_CAYF_CCAG	F	H	2016-08-02	0802F01H	3.82505
14_5_CAYC_CAYF_CCAG	F	H	2016-08-02	0802F01H	1549.15
178_9_CAYC_CAYF_CCAG	F	H	2016-08-02	0802F01H	27291.8
1837_1_CAYC_CAYF_CCAG	F	H	2016-08-02	0802F01H	13062.6
2202_1_CAYC_CAYF_CCAG	F	H	2016-08-02	0802F01H	10006.3
2758_1_CAYC_CAYF_CCAG	F	H	2016-08-02	0802F01H	8717.29
3397_1_CAYC_CAYF_CCAG	F	H	2016-08-02	0802F01H	2073.18
3924_1_CAYC_CAYF_CCAG	F	H	2016-08-02	0802F01H	114.752
CCAG48604	F	H	2016-08-02	0802F01H	183319
Vitellogenin_common	F	H	2016-08-02	0802F01H	2998.84
Vitellogenin_unique	F	H	2016-08-02	0802F01H	2910.87
comp50435_c1_seq2	F	H	2016-08-02	0802F01H	860.637
comp55113_c2_seq1	F	H	2016-08-02	0802F01H	7516.23
comp55834_c0_seq3	F	H	2016-08-02	0802F01H	118.577
comp55959_c0_seq1	F	H	2016-08-02	0802F01H	5668.73
comp56496_c0_seq4	F	H	2016-08-02	0802F01H	30.6004
comp56747_c2_seq2	F	H	2016-08-02	0802F01H	2375.36
comp57952_c3_seq2	F	H	2016-08-02	0802F01H	42.0756
comp59049_c0_seq1	F	H	2016-08-02	0802F01H	25279.8
comp60397_c0_seq1	F	H	2016-08-02	0802F01H	149.177
comp62130_c0_seq4	F	H	2016-08-02	0802F01H	2363.88
comp63155_c0_seq11	F	H	2016-08-02	0802F01H	4241.98
comp64021_c3_seq1	F	H	2016-08-02	0802F01H	4264.93
comp65435_c0_seq8	F	H	2016-08-02	0802F01H	439.881
comp65993_c0_seq6	F	H	2016-08-02	0802F01H	887.412
vitelline egg coat protein	F	H	2016-08-02	0802F01H	12511.7
0_0_CCAG28737.b1_CAYC_CAYF_CCAG	F	H	2016-08-02	0802F02H	2001.8
1252_1_CAYC_CAYF_CCAG	F	H	2016-08-02	0802F02H	4746.16
13341_0_CCAG36642.b1_CAYC_CAYF_CCAG	F	H	2016-08-02	0802F02H	439.344
1432_1_CAYC_CAYF_CCAG	F	H	2016-08-02	0802F02H	727.084
14392_1_CAYC_CAYF_CCAG	F	H	2016-08-02	0802F02H	63844.2
14490_0_CCAG5543.g1_CAYC_CAYF_CCAG	F	H	2016-08-02	0802F02H	108.289
14756_0_CCAG9200.b3_CAYC_CAYF_CCAG	F	H	2016-08-02	0802F02H	15.4699
14_5_CAYC_CAYF_CCAG	F	H	2016-08-02	0802F02H	717.802
178_9_CAYC_CAYF_CCAG	F	H	2016-08-02	0802F02H	48643.5
1837_1_CAYC_CAYF_CCAG	F	H	2016-08-02	0802F02H	15714.3
2202_1_CAYC_CAYF_CCAG	F	H	2016-08-02	0802F02H	11574.6
2758_1_CAYC_CAYF_CCAG	F	H	2016-08-02	0802F02H	10853.7
3397_1_CAYC_CAYF_CCAG	F	H	2016-08-02	0802F02H	1565.55
3924_1_CAYC_CAYF_CCAG	F	H	2016-08-02	0802F02H	129.947
CCAG48604	F	H	2016-08-02	0802F02H	239112
Vitellogenin_common	F	H	2016-08-02	0802F02H	36440.8
Vitellogenin_unique	F	H	2016-08-02	0802F02H	35327
comp50435_c1_seq2	F	H	2016-08-02	0802F02H	284.646
comp55113_c2_seq1	F	H	2016-08-02	0802F02H	14885.1
comp55834_c0_seq3	F	H	2016-08-02	0802F02H	27.8458
comp55959_c0_seq1	F	H	2016-08-02	0802F02H	6237.45
comp56496_c0_seq4	F	H	2016-08-02	0802F02H	74.2554
comp56747_c2_seq2	F	H	2016-08-02	0802F02H	2264.79
comp57952_c3_seq2	F	H	2016-08-02	0802F02H	52.5976
comp59049_c0_seq1	F	H	2016-08-02	0802F02H	9520.16
comp60397_c0_seq1	F	H	2016-08-02	0802F02H	111.383
comp62130_c0_seq4	F	H	2016-08-02	0802F02H	2929.99
comp63155_c0_seq11	F	H	2016-08-02	0802F02H	5247.38
comp64021_c3_seq1	F	H	2016-08-02	0802F02H	4876.1
comp65435_c0_seq8	F	H	2016-08-02	0802F02H	442.438
comp65993_c0_seq6	F	H	2016-08-02	0802F02H	1364.44
vitelline egg coat protein	F	H	2016-08-02	0802F02H	18656.7
0_0_CCAG28737.b1_CAYC_CAYF_CCAG	F	H	2016-08-02	0802F03H	2181.61
1252_1_CAYC_CAYF_CCAG	F	H	2016-08-02	0802F03H	4136.83
13341_0_CCAG36642.b1_CAYC_CAYF_CCAG	F	H	2016-08-02	0802F03H	596.856
1432_1_CAYC_CAYF_CCAG	F	H	2016-08-02	0802F03H	675.065
14392_1_CAYC_CAYF_CCAG	F	H	2016-08-02	0802F03H	86589.4
14490_0_CCAG5543.g1_CAYC_CAYF_CCAG	F	H	2016-08-02	0802F03H	86.4413
14756_0_CCAG9200.b3_CAYC_CAYF_CCAG	F	H	2016-08-02	0802F03H	4.11625
14_5_CAYC_CAYF_CCAG	F	H	2016-08-02	0802F03H	880.878
178_9_CAYC_CAYF_CCAG	F	H	2016-08-02	0802F03H	83119.4
1837_1_CAYC_CAYF_CCAG	F	H	2016-08-02	0802F03H	14229.9
2202_1_CAYC_CAYF_CCAG	F	H	2016-08-02	0802F03H	11509
2758_1_CAYC_CAYF_CCAG	F	H	2016-08-02	0802F03H	12254.1
3397_1_CAYC_CAYF_CCAG	F	H	2016-08-02	0802F03H	1728.83
3924_1_CAYC_CAYF_CCAG	F	H	2016-08-02	0802F03H	139.953
CCAG48604	F	H	2016-08-02	0802F03H	207883
Vitellogenin_common	F	H	2016-08-02	0802F03H	8253.08
Vitellogenin_unique	F	H	2016-08-02	0802F03H	8347.76
comp50435_c1_seq2	F	H	2016-08-02	0802F03H	193.464
comp55113_c2_seq1	F	H	2016-08-02	0802F03H	9825.49
comp55834_c0_seq3	F	H	2016-08-02	0802F03H	28.8138
comp55959_c0_seq1	F	H	2016-08-02	0802F03H	6005.61
comp56496_c0_seq4	F	H	2016-08-02	0802F03H	74.0925
comp56747_c2_seq2	F	H	2016-08-02	0802F03H	2675.56
comp57952_c3_seq2	F	H	2016-08-02	0802F03H	74.0925
comp59049_c0_seq1	F	H	2016-08-02	0802F03H	2469.75
comp60397_c0_seq1	F	H	2016-08-02	0802F03H	53.5113
comp62130_c0_seq4	F	H	2016-08-02	0802F03H	2766.12
comp63155_c0_seq11	F	H	2016-08-02	0802F03H	4671.94
comp64021_c3_seq1	F	H	2016-08-02	0802F03H	4811.9
comp65435_c0_seq8	F	H	2016-08-02	0802F03H	473.369
comp65993_c0_seq6	F	H	2016-08-02	0802F03H	1185.48
vitelline egg coat protein	F	H	2016-08-02	0802F03H	12081.2
0_0_CCAG28737.b1_CAYC_CAYF_CCAG	F	H	2016-08-02	0802F04H	1733.68
1252_1_CAYC_CAYF_CCAG	F	H	2016-08-02	0802F04H	7092.32
13341_0_CCAG36642.b1_CAYC_CAYF_CCAG	F	H	2016-08-02	0802F04H	567.385
1432_1_CAYC_CAYF_CCAG	F	H	2016-08-02	0802F04H	651.442
14392_1_CAYC_CAYF_CCAG	F	H	2016-08-02	0802F04H	98662
14490_0_CCAG5543.g1_CAYC_CAYF_CCAG	F	H	2016-08-02	0802F04H	73.5499
14756_0_CCAG9200.b3_CAYC_CAYF_CCAG	F	H	2016-08-02	0802F04H	10.5071
14_5_CAYC_CAYF_CCAG	F	H	2016-08-02	0802F04H	52.5357
178_9_CAYC_CAYF_CCAG	F	H	2016-08-02	0802F04H	17021.6
1837_1_CAYC_CAYF_CCAG	F	H	2016-08-02	0802F04H	7922.38
2202_1_CAYC_CAYF_CCAG	F	H	2016-08-02	0802F04H	1807.23
2758_1_CAYC_CAYF_CCAG	F	H	2016-08-02	0802F04H	8437.23
3397_1_CAYC_CAYF_CCAG	F	H	2016-08-02	0802F04H	1954.33
3924_1_CAYC_CAYF_CCAG	F	H	2016-08-02	0802F04H	84.0571
CCAG48604	F	H	2016-08-02	0802F04H	142393
Vitellogenin_common	F	H	2016-08-02	0802F04H	84.0571
Vitellogenin_unique	F	H	2016-08-02	0802F04H	31.5214
comp50435_c1_seq2	F	H	2016-08-02	0802F04H	6714.06
comp55113_c2_seq1	F	H	2016-08-02	0802F04H	1460.49
comp55834_c0_seq3	F	H	2016-08-02	0802F04H	252.171
comp55959_c0_seq1	F	H	2016-08-02	0802F04H	15109.3
comp56496_c0_seq4	F	H	2016-08-02	0802F04H	63.0428
comp56747_c2_seq2	F	H	2016-08-02	0802F04H	2248.53
comp57952_c3_seq2	F	H	2016-08-02	0802F04H	126.086
comp59049_c0_seq1	F	H	2016-08-02	0802F04H	20636
comp60397_c0_seq1	F	H	2016-08-02	0802F04H	105.071
comp62130_c0_seq4	F	H	2016-08-02	0802F04H	4139.81
comp63155_c0_seq11	F	H	2016-08-02	0802F04H	9298.81
comp64021_c3_seq1	F	H	2016-08-02	0802F04H	7312.97
comp65435_c0_seq8	F	H	2016-08-02	0802F04H	525.357
comp65993_c0_seq6	F	H	2016-08-02	0802F04H	987.671
vitelline egg coat protein	F	H	2016-08-02	0802F04H	4854.3
0_0_CCAG28737.b1_CAYC_CAYF_CCAG	F	H	2016-08-02	0802F05H	1569.72
1252_1_CAYC_CAYF_CCAG	F	H	2016-08-02	0802F05H	3556.7
13341_0_CCAG36642.b1_CAYC_CAYF_CCAG	F	H	2016-08-02	0802F05H	609.342
1432_1_CAYC_CAYF_CCAG	F	H	2016-08-02	0802F05H	1006.74
14392_1_CAYC_CAYF_CCAG	F	H	2016-08-02	0802F05H	60867.9
14490_0_CCAG5543.g1_CAYC_CAYF_CCAG	F	H	2016-08-02	0802F05H	79.4794
14756_0_CCAG9200.b3_CAYC_CAYF_CCAG	F	H	2016-08-02	0802F05H	13.2466
14_5_CAYC_CAYF_CCAG	F	H	2016-08-02	0802F05H	1549.85
178_9_CAYC_CAYF_CCAG	F	H	2016-08-02	0802F05H	11756.3
1837_1_CAYC_CAYF_CCAG	F	H	2016-08-02	0802F05H	5556.93
2202_1_CAYC_CAYF_CCAG	F	H	2016-08-02	0802F05H	2006.85
2758_1_CAYC_CAYF_CCAG	F	H	2016-08-02	0802F05H	8146.63
3397_1_CAYC_CAYF_CCAG	F	H	2016-08-02	0802F05H	1470.37
3924_1_CAYC_CAYF_CCAG	F	H	2016-08-02	0802F05H	52.9862
CCAG48604	F	H	2016-08-02	0802F05H	120120
Vitellogenin_common	F	H	2016-08-02	0802F05H	4430.97
Vitellogenin_unique	F	H	2016-08-02	0802F05H	4556.82
comp50435_c1_seq2	F	H	2016-08-02	0802F05H	38136.8
comp55113_c2_seq1	F	H	2016-08-02	0802F05H	2569.83
comp55834_c0_seq3	F	H	2016-08-02	0802F05H	278.178
comp55959_c0_seq1	F	H	2016-08-02	0802F05H	21134.9
comp56496_c0_seq4	F	H	2016-08-02	0802F05H	52.9862
comp56747_c2_seq2	F	H	2016-08-02	0802F05H	1953.87
comp57952_c3_seq2	F	H	2016-08-02	0802F05H	105.972
comp59049_c0_seq1	F	H	2016-08-02	0802F05H	38256.1
comp60397_c0_seq1	F	H	2016-08-02	0802F05H	139.089
comp62130_c0_seq4	F	H	2016-08-02	0802F05H	6225.88
comp63155_c0_seq11	F	H	2016-08-02	0802F05H	11988.1
comp64021_c3_seq1	F	H	2016-08-02	0802F05H	7596.9
comp65435_c0_seq8	F	H	2016-08-02	0802F05H	390.774
comp65993_c0_seq6	F	H	2016-08-02	0802F05H	1152.45
vitelline egg coat protein	F	H	2016-08-02	0802F05H	4099.81
0_0_CCAG28737.b1_CAYC_CAYF_CCAG	M	H	2016-08-02	0802M01H	899.691
1252_1_CAYC_CAYF_CCAG	M	H	2016-08-02	0802M01H	1547.72
13341_0_CCAG36642.b1_CAYC_CAYF_CCAG	M	H	2016-08-02	0802M01H	399.513
1432_1_CAYC_CAYF_CCAG	M	H	2016-08-02	0802M01H	509.615
14392_1_CAYC_CAYF_CCAG	M	H	2016-08-02	0802M01H	113.248
14490_0_CCAG5543.g1_CAYC_CAYF_CCAG	M	H	2016-08-02	0802M01H	150.997
14756_0_CCAG9200.b3_CAYC_CAYF_CCAG	M	H	2016-08-02	0802M01H	342.889
14_5_CAYC_CAYF_CCAG	M	H	2016-08-02	0802M01H	1242.58
178_9_CAYC_CAYF_CCAG	M	H	2016-08-02	0802M01H	22542.6
1837_1_CAYC_CAYF_CCAG	M	H	2016-08-02	0802M01H	6115.38
2202_1_CAYC_CAYF_CCAG	M	H	2016-08-02	0802M01H	7150.34
2758_1_CAYC_CAYF_CCAG	M	H	2016-08-02	0802M01H	6492.88
3397_1_CAYC_CAYF_CCAG	M	H	2016-08-02	0802M01H	1874.88
3924_1_CAYC_CAYF_CCAG	M	H	2016-08-02	0802M01H	707.799
CCAG48604	M	H	2016-08-02	0802M01H	109957
Vitellogenin_common	M	H	2016-08-02	0802M01H	72.3528
Vitellogenin_unique	M	H	2016-08-02	0802M01H	50.3324
comp50435_c1_seq2	M	H	2016-08-02	0802M01H	1358.97
comp55113_c2_seq1	M	H	2016-08-02	0802M01H	6159.42
comp55834_c0_seq3	M	H	2016-08-02	0802M01H	69.207
comp55959_c0_seq1	M	H	2016-08-02	0802M01H	2639.3
comp56496_c0_seq4	M	H	2016-08-02	0802M01H	18.8746
comp56747_c2_seq2	M	H	2016-08-02	0802M01H	1755.34
comp57952_c3_seq2	M	H	2016-08-02	0802M01H	40.8951
comp59049_c0_seq1	M	H	2016-08-02	0802M01H	16417.8
comp60397_c0_seq1	M	H	2016-08-02	0802M01H	147.851
comp62130_c0_seq4	M	H	2016-08-02	0802M01H	1157.64
comp63155_c0_seq11	M	H	2016-08-02	0802M01H	4529.91
comp64021_c3_seq1	M	H	2016-08-02	0802M01H	3353.39
comp65435_c0_seq8	M	H	2016-08-02	0802M01H	248.516
comp65993_c0_seq6	M	H	2016-08-02	0802M01H	1123.04
vitelline egg coat protein	M	H	2016-08-02	0802M01H	8219.91
0_0_CCAG28737.b1_CAYC_CAYF_CCAG	M	H	2016-08-02	0802M02H	1566.06
1252_1_CAYC_CAYF_CCAG	M	H	2016-08-02	0802M02H	881.911
13341_0_CCAG36642.b1_CAYC_CAYF_CCAG	M	H	2016-08-02	0802M02H	518.457
1432_1_CAYC_CAYF_CCAG	M	H	2016-08-02	0802M02H	256.556
14392_1_CAYC_CAYF_CCAG	M	H	2016-08-02	0802M02H	80.1737
14490_0_CCAG5543.g1_CAYC_CAYF_CCAG	M	H	2016-08-02	0802M02H	32.0695
14756_0_CCAG9200.b3_CAYC_CAYF_CCAG	M	H	2016-08-02	0802M02H	780.358
14_5_CAYC_CAYF_CCAG	M	H	2016-08-02	0802M02H	1485.89
178_9_CAYC_CAYF_CCAG	M	H	2016-08-02	0802M02H	60221.2
1837_1_CAYC_CAYF_CCAG	M	H	2016-08-02	0802M02H	8386.17
2202_1_CAYC_CAYF_CCAG	M	H	2016-08-02	0802M02H	4628.7
2758_1_CAYC_CAYF_CCAG	M	H	2016-08-02	0802M02H	13437.1
3397_1_CAYC_CAYF_CCAG	M	H	2016-08-02	0802M02H	2041.76
3924_1_CAYC_CAYF_CCAG	M	H	2016-08-02	0802M02H	1683.65
CCAG48604	M	H	2016-08-02	0802M02H	117524
Vitellogenin_common	M	H	2016-08-02	0802M02H	21.3797
Vitellogenin_unique	M	H	2016-08-02	0802M02H	26.7246
comp50435_c1_seq2	M	H	2016-08-02	0802M02H	42.7593
comp55113_c2_seq1	M	H	2016-08-02	0802M02H	3639.89
comp55834_c0_seq3	M	H	2016-08-02	0802M02H	10.6898
comp55959_c0_seq1	M	H	2016-08-02	0802M02H	12459
comp56496_c0_seq4	M	H	2016-08-02	0802M02H	58.7941
comp56747_c2_seq2	M	H	2016-08-02	0802M02H	1918.82
comp57952_c3_seq2	M	H	2016-08-02	0802M02H	42.7593
comp59049_c0_seq1	M	H	2016-08-02	0802M02H	267.246
comp60397_c0_seq1	M	H	2016-08-02	0802M02H	85.5187
comp62130_c0_seq4	M	H	2016-08-02	0802M02H	4719.56
comp63155_c0_seq11	M	H	2016-08-02	0802M02H	7408.05
comp64021_c3_seq1	M	H	2016-08-02	0802M02H	5093.7
comp65435_c0_seq8	M	H	2016-08-02	0802M02H	395.524
comp65993_c0_seq6	M	H	2016-08-02	0802M02H	1437.78
vitelline egg coat protein	M	H	2016-08-02	0802M02H	8952.73
0_0_CCAG28737.b1_CAYC_CAYF_CCAG	M	H	2016-08-02	0802M03H	1772.41
1252_1_CAYC_CAYF_CCAG	M	H	2016-08-02	0802M03H	2760.83
13341_0_CCAG36642.b1_CAYC_CAYF_CCAG	M	H	2016-08-02	0802M03H	577.571
1432_1_CAYC_CAYF_CCAG	M	H	2016-08-02	0802M03H	611.312
14392_1_CAYC_CAYF_CCAG	M	H	2016-08-02	0802M03H	47676.4
14490_0_CCAG5543.g1_CAYC_CAYF_CCAG	M	H	2016-08-02	0802M03H	87.3303
14756_0_CCAG9200.b3_CAYC_CAYF_CCAG	M	H	2016-08-02	0802M03H	1.98478
14_5_CAYC_CAYF_CCAG	M	H	2016-08-02	0802M03H	1409.19
178_9_CAYC_CAYF_CCAG	M	H	2016-08-02	0802M03H	31542.1
1837_1_CAYC_CAYF_CCAG	M	H	2016-08-02	0802M03H	12619.2
2202_1_CAYC_CAYF_CCAG	M	H	2016-08-02	0802M03H	11845.2
2758_1_CAYC_CAYF_CCAG	M	H	2016-08-02	0802M03H	9469.38
3397_1_CAYC_CAYF_CCAG	M	H	2016-08-02	0802M03H	1883.55
3924_1_CAYC_CAYF_CCAG	M	H	2016-08-02	0802M03H	69.4672
CCAG48604	M	H	2016-08-02	0802M03H	157403
Vitellogenin_common	M	H	2016-08-02	0802M03H	4130.32
Vitellogenin_unique	M	H	2016-08-02	0802M03H	4082.69
comp50435_c1_seq2	M	H	2016-08-02	0802M03H	375.123
comp55113_c2_seq1	M	H	2016-08-02	0802M03H	5563.33
comp55834_c0_seq3	M	H	2016-08-02	0802M03H	130.995
comp55959_c0_seq1	M	H	2016-08-02	0802M03H	5376.76
comp56496_c0_seq4	M	H	2016-08-02	0802M03H	33.7412
comp56747_c2_seq2	M	H	2016-08-02	0802M03H	2119.74
comp57952_c3_seq2	M	H	2016-08-02	0802M03H	49.6195
comp59049_c0_seq1	M	H	2016-08-02	0802M03H	27376
comp60397_c0_seq1	M	H	2016-08-02	0802M03H	99.2389
comp62130_c0_seq4	M	H	2016-08-02	0802M03H	1978.82
comp63155_c0_seq11	M	H	2016-08-02	0802M03H	4219.64
comp64021_c3_seq1	M	H	2016-08-02	0802M03H	3921.92
comp65435_c0_seq8	M	H	2016-08-02	0802M03H	446.575
comp65993_c0_seq6	M	H	2016-08-02	0802M03H	1186.9
vitelline egg coat protein	M	H	2016-08-02	0802M03H	7051.92
0_0_CCAG28737.b1_CAYC_CAYF_CCAG	M	H	2016-08-02	0802M04H	2004.43
1252_1_CAYC_CAYF_CCAG	M	H	2016-08-02	0802M04H	1739.62
13341_0_CCAG36642.b1_CAYC_CAYF_CCAG	M	H	2016-08-02	0802M04H	668.144
1432_1_CAYC_CAYF_CCAG	M	H	2016-08-02	0802M04H	439.997
14392_1_CAYC_CAYF_CCAG	M	H	2016-08-02	0802M04H	199.628
14490_0_CCAG5543.g1_CAYC_CAYF_CCAG	M	H	2016-08-02	0802M04H	167.036
14756_0_CCAG9200.b3_CAYC_CAYF_CCAG	M	H	2016-08-02	0802M04H	305.554
14_5_CAYC_CAYF_CCAG	M	H	2016-08-02	0802M04H	69.2588
178_9_CAYC_CAYF_CCAG	M	H	2016-08-02	0802M04H	30636.9
1837_1_CAYC_CAYF_CCAG	M	H	2016-08-02	0802M04H	11044.7
2202_1_CAYC_CAYF_CCAG	M	H	2016-08-02	0802M04H	11989.9
2758_1_CAYC_CAYF_CCAG	M	H	2016-08-02	0802M04H	14320.3
3397_1_CAYC_CAYF_CCAG	M	H	2016-08-02	0802M04H	2419.99
3924_1_CAYC_CAYF_CCAG	M	H	2016-08-02	0802M04H	647.774
CCAG48604	M	H	2016-08-02	0802M04H	282376
Vitellogenin_common	M	H	2016-08-02	0802M04H	65.1848
Vitellogenin_unique	M	H	2016-08-02	0802M04H	24.4443
comp50435_c1_seq2	M	H	2016-08-02	0802M04H	827.032
comp55113_c2_seq1	M	H	2016-08-02	0802M04H	10841
comp55834_c0_seq3	M	H	2016-08-02	0802M04H	93.7031
comp55959_c0_seq1	M	H	2016-08-02	0802M04H	6942.18
comp56496_c0_seq4	M	H	2016-08-02	0802M04H	73.3329
comp56747_c2_seq2	M	H	2016-08-02	0802M04H	2102.21
comp57952_c3_seq2	M	H	2016-08-02	0802M04H	85.555
comp59049_c0_seq1	M	H	2016-08-02	0802M04H	30168.3
comp60397_c0_seq1	M	H	2016-08-02	0802M04H	109.999
comp62130_c0_seq4	M	H	2016-08-02	0802M04H	3161.46
comp63155_c0_seq11	M	H	2016-08-02	0802M04H	5320.71
comp64021_c3_seq1	M	H	2016-08-02	0802M04H	5190.34
comp65435_c0_seq8	M	H	2016-08-02	0802M04H	350.368
comp65993_c0_seq6	M	H	2016-08-02	0802M04H	1499.25
vitelline egg coat protein	M	H	2016-08-02	0802M04H	14845.8
0_0_CCAG28737.b1_CAYC_CAYF_CCAG	M	H	2016-08-02	0802M05H	2028.25
1252_1_CAYC_CAYF_CCAG	M	H	2016-08-02	0802M05H	1654.25
13341_0_CCAG36642.b1_CAYC_CAYF_CCAG	M	H	2016-08-02	0802M05H	611.353
1432_1_CAYC_CAYF_CCAG	M	H	2016-08-02	0802M05H	251.733
14392_1_CAYC_CAYF_CCAG	M	H	2016-08-02	0802M05H	273.311
14490_0_CCAG5543.g1_CAYC_CAYF_CCAG	M	H	2016-08-02	0802M05H	158.232
14756_0_CCAG9200.b3_CAYC_CAYF_CCAG	M	H	2016-08-02	0802M05H	445.928
14_5_CAYC_CAYF_CCAG	M	H	2016-08-02	0802M05H	2351.91
178_9_CAYC_CAYF_CCAG	M	H	2016-08-02	0802M05H	24799.3
1837_1_CAYC_CAYF_CCAG	M	H	2016-08-02	0802M05H	9817.6
2202_1_CAYC_CAYF_CCAG	M	H	2016-08-02	0802M05H	12464.4
2758_1_CAYC_CAYF_CCAG	M	H	2016-08-02	0802M05H	12687.4
3397_1_CAYC_CAYF_CCAG	M	H	2016-08-02	0802M05H	2560.49
3924_1_CAYC_CAYF_CCAG	M	H	2016-08-02	0802M05H	1186.74
CCAG48604	M	H	2016-08-02	0802M05H	198179
Vitellogenin_common	M	H	2016-08-02	0802M05H	28.7695
Vitellogenin_unique	M	H	2016-08-02	0802M05H	57.5391
comp50435_c1_seq2	M	H	2016-08-02	0802M05H	374.004
comp55113_c2_seq1	M	H	2016-08-02	0802M05H	6235.8
comp55834_c0_seq3	M	H	2016-08-02	0802M05H	71.9238
comp55959_c0_seq1	M	H	2016-08-02	0802M05H	6394.03
comp56496_c0_seq4	M	H	2016-08-02	0802M05H	35.9619
comp56747_c2_seq2	M	H	2016-08-02	0802M05H	1841.25
comp57952_c3_seq2	M	H	2016-08-02	0802M05H	21.5771
comp59049_c0_seq1	M	H	2016-08-02	0802M05H	27683.5
comp60397_c0_seq1	M	H	2016-08-02	0802M05H	122.271
comp62130_c0_seq4	M	H	2016-08-02	0802M05H	2517.33
comp63155_c0_seq11	M	H	2016-08-02	0802M05H	5272.02
comp64021_c3_seq1	M	H	2016-08-02	0802M05H	4380.16
comp65435_c0_seq8	M	H	2016-08-02	0802M05H	323.657
comp65993_c0_seq6	M	H	2016-08-02	0802M05H	1603.9
vitelline egg coat protein	M	H	2016-08-02	0802M05H	12838.4
0_0_CCAG28737.b1_CAYC_CAYF_CCAG	F	H	2016-12-22	1222F02H	1162.77
1252_1_CAYC_CAYF_CCAG	F	H	2016-12-22	1222F02H	5256.82
13341_0_CCAG36642.b1_CAYC_CAYF_CCAG	F	H	2016-12-22	1222F02H	508.332
1432_1_CAYC_CAYF_CCAG	F	H	2016-12-22	1222F02H	800.547
14392_1_CAYC_CAYF_CCAG	F	H	2016-12-22	1222F02H	90375
14490_0_CCAG5543.g1_CAYC_CAYF_CCAG	F	H	2016-12-22	1222F02H	199.376
14756_0_CCAG9200.b3_CAYC_CAYF_CCAG	F	H	2016-12-22	1222F02H	3.0439
14_5_CAYC_CAYF_CCAG	F	H	2016-12-22	1222F02H	996.878
178_9_CAYC_CAYF_CCAG	F	H	2016-12-22	1222F02H	54347.4
1837_1_CAYC_CAYF_CCAG	F	H	2016-12-22	1222F02H	10417.8
2202_1_CAYC_CAYF_CCAG	F	H	2016-12-22	1222F02H	7574.75
2758_1_CAYC_CAYF_CCAG	F	H	2016-12-22	1222F02H	14291.1
3397_1_CAYC_CAYF_CCAG	F	H	2016-12-22	1222F02H	1827.86
3924_1_CAYC_CAYF_CCAG	F	H	2016-12-22	1222F02H	88.2732
CCAG48604	F	H	2016-12-22	1222F02H	158776
Vitellogenin_common	F	H	2016-12-22	1222F02H	588426
Vitellogenin_unique	F	H	2016-12-22	1222F02H	541351
comp50435_c1_seq2	F	H	2016-12-22	1222F02H	173.502
comp55113_c2_seq1	F	H	2016-12-22	1222F02H	2885.62
comp55834_c0_seq3	F	H	2016-12-22	1222F02H	351.571
comp55959_c0_seq1	F	H	2016-12-22	1222F02H	6917.27
comp56496_c0_seq4	F	H	2016-12-22	1222F02H	54.7903
comp56747_c2_seq2	F	H	2016-12-22	1222F02H	2237.27
comp57952_c3_seq2	F	H	2016-12-22	1222F02H	60.8781
comp59049_c0_seq1	F	H	2016-12-22	1222F02H	1298.22
comp60397_c0_seq1	F	H	2016-12-22	1222F02H	89.7951
comp62130_c0_seq4	F	H	2016-12-22	1222F02H	2584.27
comp63155_c0_seq11	F	H	2016-12-22	1222F02H	5378.58
comp64021_c3_seq1	F	H	2016-12-22	1222F02H	4946.34
comp65435_c0_seq8	F	H	2016-12-22	1222F02H	522.029
comp65993_c0_seq6	F	H	2016-12-22	1222F02H	1246.48
vitelline egg coat protein	F	H	2016-12-22	1222F02H	6393.72
0_0_CCAG28737.b1_CAYC_CAYF_CCAG	F	L	2016-12-22	1222F02L	988.447
1252_1_CAYC_CAYF_CCAG	F	L	2016-12-22	1222F02L	2327.3
13341_0_CCAG36642.b1_CAYC_CAYF_CCAG	F	L	2016-12-22	1222F02L	599.344
1432_1_CAYC_CAYF_CCAG	F	L	2016-12-22	1222F02L	718.585
14392_1_CAYC_CAYF_CCAG	F	L	2016-12-22	1222F02L	57059
14490_0_CCAG5543.g1_CAYC_CAYF_CCAG	F	L	2016-12-22	1222F02L	36.6091
14756_0_CCAG9200.b3_CAYC_CAYF_CCAG	F	L	2016-12-22	1222F02L	3.13793
14_5_CAYC_CAYF_CCAG	F	L	2016-12-22	1222F02L	414.206
178_9_CAYC_CAYF_CCAG	F	L	2016-12-22	1222F02L	59500.3
1837_1_CAYC_CAYF_CCAG	F	L	2016-12-22	1222F02L	15803.6
2202_1_CAYC_CAYF_CCAG	F	L	2016-12-22	1222F02L	7374.13
2758_1_CAYC_CAYF_CCAG	F	L	2016-12-22	1222F02L	15650.9
3397_1_CAYC_CAYF_CCAG	F	L	2016-12-22	1222F02L	2254.08
3924_1_CAYC_CAYF_CCAG	F	L	2016-12-22	1222F02L	83.678
CCAG48604	F	L	2016-12-22	1222F02L	153573
Vitellogenin_common	F	L	2016-12-22	1222F02L	32204.5
Vitellogenin_unique	F	L	2016-12-22	1222F02L	32699.3
comp50435_c1_seq2	F	L	2016-12-22	1222F02L	38.7011
comp55113_c2_seq1	F	L	2016-12-22	1222F02L	1916.23
comp55834_c0_seq3	F	L	2016-12-22	1222F02L	49.1608
comp55959_c0_seq1	F	L	2016-12-22	1222F02L	6596.97
comp56496_c0_seq4	F	L	2016-12-22	1222F02L	61.7126
comp56747_c2_seq2	F	L	2016-12-22	1222F02L	2353.44
comp57952_c3_seq2	F	L	2016-12-22	1222F02L	40.793
comp59049_c0_seq1	F	L	2016-12-22	1222F02L	3182.9
comp60397_c0_seq1	F	L	2016-12-22	1222F02L	97.2757
comp62130_c0_seq4	F	L	2016-12-22	1222F02L	2200.73
comp63155_c0_seq11	F	L	2016-12-22	1222F02L	5100.18
comp64021_c3_seq1	F	L	2016-12-22	1222F02L	3604.43
comp65435_c0_seq8	F	L	2016-12-22	1222F02L	463.367
comp65993_c0_seq6	F	L	2016-12-22	1222F02L	1057.48
vitelline egg coat protein	F	L	2016-12-22	1222F02L	8563.4
0_0_CCAG28737.b1_CAYC_CAYF_CCAG	F	H	2016-08-30	0830F01H	841.685
1252_1_CAYC_CAYF_CCAG	F	H	2016-08-30	0830F01H	2027.7
13341_0_CCAG36642.b1_CAYC_CAYF_CCAG	F	H	2016-08-30	0830F01H	1407.54
1432_1_CAYC_CAYF_CCAG	F	H	2016-08-30	0830F01H	1926.5
14392_1_CAYC_CAYF_CCAG	F	H	2016-08-30	0830F01H	45504.1
14490_0_CCAG5543.g1_CAYC_CAYF_CCAG	F	H	2016-08-30	0830F01H	64.7925
14756_0_CCAG9200.b3_CAYC_CAYF_CCAG	F	H	2016-08-30	0830F01H	1.85121
14_5_CAYC_CAYF_CCAG	F	H	2016-08-30	0830F01H	971.887
178_9_CAYC_CAYF_CCAG	F	H	2016-08-30	0830F01H	5277.81
1837_1_CAYC_CAYF_CCAG	F	H	2016-08-30	0830F01H	4278.77
2202_1_CAYC_CAYF_CCAG	F	H	2016-08-30	0830F01H	6350.28
2758_1_CAYC_CAYF_CCAG	F	H	2016-08-30	0830F01H	8185.45
3397_1_CAYC_CAYF_CCAG	F	H	2016-08-30	0830F01H	2173.94
3924_1_CAYC_CAYF_CCAG	F	H	2016-08-30	0830F01H	61.0901
CCAG48604	F	H	2016-08-30	0830F01H	132289
Vitellogenin_common	F	H	2016-08-30	0830F01H	61.7071
Vitellogenin_unique	F	H	2016-08-30	0830F01H	43.8121
comp50435_c1_seq2	F	H	2016-08-30	0830F01H	40213.3
comp55113_c2_seq1	F	H	2016-08-30	0830F01H	1090.37
comp55834_c0_seq3	F	H	2016-08-30	0830F01H	93.7949
comp55959_c0_seq1	F	H	2016-08-30	0830F01H	10990.7
comp56496_c0_seq4	F	H	2016-08-30	0830F01H	44.4291
comp56747_c2_seq2	F	H	2016-08-30	0830F01H	1383.47
comp57952_c3_seq2	F	H	2016-08-30	0830F01H	37.6414
comp59049_c0_seq1	F	H	2016-08-30	0830F01H	8300.84
comp60397_c0_seq1	F	H	2016-08-30	0830F01H	380.116
comp62130_c0_seq4	F	H	2016-08-30	0830F01H	3252.58
comp63155_c0_seq11	F	H	2016-08-30	0830F01H	10038.5
comp64021_c3_seq1	F	H	2016-08-30	0830F01H	4708.87
comp65435_c0_seq8	F	H	2016-08-30	0830F01H	492.423
comp65993_c0_seq6	F	H	2016-08-30	0830F01H	1740.14
vitelline egg coat protein	F	H	2016-08-30	0830F01H	2341.79
0_0_CCAG28737.b1_CAYC_CAYF_CCAG	F	H	2016-08-30	0830F02H	1100.13
1252_1_CAYC_CAYF_CCAG	F	H	2016-08-30	0830F02H	4013.15
13341_0_CCAG36642.b1_CAYC_CAYF_CCAG	F	H	2016-08-30	0830F02H	415.38
1432_1_CAYC_CAYF_CCAG	F	H	2016-08-30	0830F02H	641.842
14392_1_CAYC_CAYF_CCAG	F	H	2016-08-30	0830F02H	87678.5
14490_0_CCAG5543.g1_CAYC_CAYF_CCAG	F	H	2016-08-30	0830F02H	36.9491
14756_0_CCAG9200.b3_CAYC_CAYF_CCAG	F	H	2016-08-30	0830F02H	0.595954
14_5_CAYC_CAYF_CCAG	F	H	2016-08-30	0830F02H	1747.34
178_9_CAYC_CAYF_CCAG	F	H	2016-08-30	0830F02H	38071.9
1837_1_CAYC_CAYF_CCAG	F	H	2016-08-30	0830F02H	11707.5
2202_1_CAYC_CAYF_CCAG	F	H	2016-08-30	0830F02H	4629.37
2758_1_CAYC_CAYF_CCAG	F	H	2016-08-30	0830F02H	12699.2
3397_1_CAYC_CAYF_CCAG	F	H	2016-08-30	0830F02H	1976.78
3924_1_CAYC_CAYF_CCAG	F	H	2016-08-30	0830F02H	75.0901
CCAG48604	F	H	2016-08-30	0830F02H	116748
Vitellogenin_common	F	H	2016-08-30	0830F02H	3376.67
Vitellogenin_unique	F	H	2016-08-30	0830F02H	3583.47
comp50435_c1_seq2	F	H	2016-08-30	0830F02H	33.3734
comp55113_c2_seq1	F	H	2016-08-30	0830F02H	1598.35
comp55834_c0_seq3	F	H	2016-08-30	0830F02H	20.2624
comp55959_c0_seq1	F	H	2016-08-30	0830F02H	10029.3
comp56496_c0_seq4	F	H	2016-08-30	0830F02H	47.0803
comp56747_c2_seq2	F	H	2016-08-30	0830F02H	2520.88
comp57952_c3_seq2	F	H	2016-08-30	0830F02H	52.4439
comp59049_c0_seq1	F	H	2016-08-30	0830F02H	89.989
comp60397_c0_seq1	F	H	2016-08-30	0830F02H	127.534
comp62130_c0_seq4	F	H	2016-08-30	0830F02H	3403.49
comp63155_c0_seq11	F	H	2016-08-30	0830F02H	5830.21
comp64021_c3_seq1	F	H	2016-08-30	0830F02H	4566.2
comp65435_c0_seq8	F	H	2016-08-30	0830F02H	643.63
comp65993_c0_seq6	F	H	2016-08-30	0830F02H	1346.26
vitelline egg coat protein	F	H	2016-08-30	0830F02H	3991.1
0_0_CCAG28737.b1_CAYC_CAYF_CCAG	F	H	2016-08-30	0830F03H	774.926
1252_1_CAYC_CAYF_CCAG	F	H	2016-08-30	0830F03H	3184.34
13341_0_CCAG36642.b1_CAYC_CAYF_CCAG	F	H	2016-08-30	0830F03H	713.324
1432_1_CAYC_CAYF_CCAG	F	H	2016-08-30	0830F03H	1840.02
14392_1_CAYC_CAYF_CCAG	F	H	2016-08-30	0830F03H	30222.7
14490_0_CCAG5543.g1_CAYC_CAYF_CCAG	F	H	2016-08-30	0830F03H	66.2084
14756_0_CCAG9200.b3_CAYC_CAYF_CCAG	F	H	2016-08-30	0830F03H	1.72718
14_5_CAYC_CAYF_CCAG	F	H	2016-08-30	0830F03H	861.285
178_9_CAYC_CAYF_CCAG	F	H	2016-08-30	0830F03H	5422.18
1837_1_CAYC_CAYF_CCAG	F	H	2016-08-30	0830F03H	3519.98
2202_1_CAYC_CAYF_CCAG	F	H	2016-08-30	0830F03H	2564.86
2758_1_CAYC_CAYF_CCAG	F	H	2016-08-30	0830F03H	6862.07
3397_1_CAYC_CAYF_CCAG	F	H	2016-08-30	0830F03H	2008.71
3924_1_CAYC_CAYF_CCAG	F	H	2016-08-30	0830F03H	37.9979
CCAG48604	F	H	2016-08-30	0830F03H	102240
Vitellogenin_common	F	H	2016-08-30	0830F03H	163.506
Vitellogenin_unique	F	H	2016-08-30	0830F03H	133.568
comp50435_c1_seq2	F	H	2016-08-30	0830F03H	56465.4
comp55113_c2_seq1	F	H	2016-08-30	0830F03H	1253.93
comp55834_c0_seq3	F	H	2016-08-30	0830F03H	341.405
comp55959_c0_seq1	F	H	2016-08-30	0830F03H	13147.3
comp56496_c0_seq4	F	H	2016-08-30	0830F03H	32.2406
comp56747_c2_seq2	F	H	2016-08-30	0830F03H	1373.1
comp57952_c3_seq2	F	H	2016-08-30	0830F03H	80.0258
comp59049_c0_seq1	F	H	2016-08-30	0830F03H	15668.4
comp60397_c0_seq1	F	H	2016-08-30	0830F03H	329.315
comp62130_c0_seq4	F	H	2016-08-30	0830F03H	3507.32
comp63155_c0_seq11	F	H	2016-08-30	0830F03H	8950.23
comp64021_c3_seq1	F	H	2016-08-30	0830F03H	4840.7
comp65435_c0_seq8	F	H	2016-08-30	0830F03H	504.335
comp65993_c0_seq6	F	H	2016-08-30	0830F03H	941.887
vitelline egg coat protein	F	H	2016-08-30	0830F03H	2188.33
0_0_CCAG28737.b1_CAYC_CAYF_CCAG	F	H	2016-08-30	0830F04H	1297.83
1252_1_CAYC_CAYF_CCAG	F	H	2016-08-30	0830F04H	683.266
13341_0_CCAG36642.b1_CAYC_CAYF_CCAG	F	H	2016-08-30	0830F04H	557.833
1432_1_CAYC_CAYF_CCAG	F	H	2016-08-30	0830F04H	585.567
14392_1_CAYC_CAYF_CCAG	F	H	2016-08-30	0830F04H	213.048
14490_0_CCAG5543.g1_CAYC_CAYF_CCAG	F	H	2016-08-30	0830F04H	107.154
14756_0_CCAG9200.b3_CAYC_CAYF_CCAG	F	H	2016-08-30	0830F04H	579.263
14_5_CAYC_CAYF_CCAG	F	H	2016-08-30	0830F04H	65.5532
178_9_CAYC_CAYF_CCAG	F	H	2016-08-30	0830F04H	14101.5
1837_1_CAYC_CAYF_CCAG	F	H	2016-08-30	0830F04H	7778.14
2202_1_CAYC_CAYF_CCAG	F	H	2016-08-30	0830F04H	8504.9
2758_1_CAYC_CAYF_CCAG	F	H	2016-08-30	0830F04H	14569.8
3397_1_CAYC_CAYF_CCAG	F	H	2016-08-30	0830F04H	2375.04
3924_1_CAYC_CAYF_CCAG	F	H	2016-08-30	0830F04H	1568.23
CCAG48604	F	H	2016-08-30	0830F04H	186087
Vitellogenin_common	F	H	2016-08-30	0830F04H	71.2261
Vitellogenin_unique	F	H	2016-08-30	0830F04H	48.5346
comp50435_c1_seq2	F	H	2016-08-30	0830F04H	1342.58
comp55113_c2_seq1	F	H	2016-08-30	0830F04H	6076.28
comp55834_c0_seq3	F	H	2016-08-30	0830F04H	214.309
comp55959_c0_seq1	F	H	2016-08-30	0830F04H	5607.32
comp56496_c0_seq4	F	H	2016-08-30	0830F04H	40.3404
comp56747_c2_seq2	F	H	2016-08-30	0830F04H	1216.52
comp57952_c3_seq2	F	H	2016-08-30	0830F04H	40.9708
comp59049_c0_seq1	F	H	2016-08-30	0830F04H	28041
comp60397_c0_seq1	F	H	2016-08-30	0830F04H	162.622
comp62130_c0_seq4	F	H	2016-08-30	0830F04H	2146.87
comp63155_c0_seq11	F	H	2016-08-30	0830F04H	5173.03
comp64021_c3_seq1	F	H	2016-08-30	0830F04H	3487.56
comp65435_c0_seq8	F	H	2016-08-30	0830F04H	321.463
comp65993_c0_seq6	F	H	2016-08-30	0830F04H	972.583
vitelline egg coat protein	F	H	2016-08-30	0830F04H	6702.19
0_0_CCAG28737.b1_CAYC_CAYF_CCAG	F	H	2016-08-30	0830F05H	370.59
1252_1_CAYC_CAYF_CCAG	F	H	2016-08-30	0830F05H	3417.14
13341_0_CCAG36642.b1_CAYC_CAYF_CCAG	F	H	2016-08-30	0830F05H	1369.7
1432_1_CAYC_CAYF_CCAG	F	H	2016-08-30	0830F05H	1947.23
14392_1_CAYC_CAYF_CCAG	F	H	2016-08-30	0830F05H	55523.9
14490_0_CCAG5543.g1_CAYC_CAYF_CCAG	F	H	2016-08-30	0830F05H	62.2591
14756_0_CCAG9200.b3_CAYC_CAYF_CCAG	F	H	2016-08-30	0830F05H	2.37178
14_5_CAYC_CAYF_CCAG	F	H	2016-08-30	0830F05H	1430.18
178_9_CAYC_CAYF_CCAG	F	H	2016-08-30	0830F05H	4572.19
1837_1_CAYC_CAYF_CCAG	F	H	2016-08-30	0830F05H	5691.67
2202_1_CAYC_CAYF_CCAG	F	H	2016-08-30	0830F05H	4841.98
2758_1_CAYC_CAYF_CCAG	F	H	2016-08-30	0830F05H	7226.21
3397_1_CAYC_CAYF_CCAG	F	H	2016-08-30	0830F05H	1874.3
3924_1_CAYC_CAYF_CCAG	F	H	2016-08-30	0830F05H	42.692
CCAG48604	F	H	2016-08-30	0830F05H	91548.2
Vitellogenin_common	F	H	2016-08-30	0830F05H	57.5155
Vitellogenin_unique	F	H	2016-08-30	0830F05H	33.7978
comp50435_c1_seq2	F	H	2016-08-30	0830F05H	44495.1
comp55113_c2_seq1	F	H	2016-08-30	0830F05H	1081.53
comp55834_c0_seq3	F	H	2016-08-30	0830F05H	182.627
comp55959_c0_seq1	F	H	2016-08-30	0830F05H	13757.5
comp56496_c0_seq4	F	H	2016-08-30	0830F05H	33.2049
comp56747_c2_seq2	F	H	2016-08-30	0830F05H	1380.37
comp57952_c3_seq2	F	H	2016-08-30	0830F05H	26.0895
comp59049_c0_seq1	F	H	2016-08-30	0830F05H	9548.77
comp60397_c0_seq1	F	H	2016-08-30	0830F05H	480.877
comp62130_c0_seq4	F	H	2016-08-30	0830F05H	3634.75
comp63155_c0_seq11	F	H	2016-08-30	0830F05H	10071.7
comp64021_c3_seq1	F	H	2016-08-30	0830F05H	4735.25
comp65435_c0_seq8	F	H	2016-08-30	0830F05H	434.628
comp65993_c0_seq6	F	H	2016-08-30	0830F05H	1905.72
vitelline egg coat protein	F	H	2016-08-30	0830F05H	1021.05
0_0_CCAG28737.b1_CAYC_CAYF_CCAG	M	H	2016-08-30	0830M01H	2333.18
1252_1_CAYC_CAYF_CCAG	M	H	2016-08-30	0830M01H	1182.45
13341_0_CCAG36642.b1_CAYC_CAYF_CCAG	M	H	2016-08-30	0830M01H	494.842
1432_1_CAYC_CAYF_CCAG	M	H	2016-08-30	0830M01H	497.346
14392_1_CAYC_CAYF_CCAG	M	H	2016-08-30	0830M01H	539.904
14490_0_CCAG5543.g1_CAYC_CAYF_CCAG	M	H	2016-08-30	0830M01H	87.6196
14756_0_CCAG9200.b3_CAYC_CAYF_CCAG	M	H	2016-08-30	0830M01H	67.5923
14_5_CAYC_CAYF_CCAG	M	H	2016-08-30	0830M01H	1166.59
178_9_CAYC_CAYF_CCAG	M	H	2016-08-30	0830M01H	52270.5
1837_1_CAYC_CAYF_CCAG	M	H	2016-08-30	0830M01H	12026.4
2202_1_CAYC_CAYF_CCAG	M	H	2016-08-30	0830M01H	17302.8
2758_1_CAYC_CAYF_CCAG	M	H	2016-08-30	0830M01H	14453.1
3397_1_CAYC_CAYF_CCAG	M	H	2016-08-30	0830M01H	2379.08
3924_1_CAYC_CAYF_CCAG	M	H	2016-08-30	0830M01H	231.983
CCAG48604	M	H	2016-08-30	0830M01H	260152
Vitellogenin_common	M	H	2016-08-30	0830M01H	46.7305
Vitellogenin_unique	M	H	2016-08-30	0830M01H	30.041
comp50435_c1_seq2	M	H	2016-08-30	0830M01H	1147.4
comp55113_c2_seq1	M	H	2016-08-30	0830M01H	9880.99
comp55834_c0_seq3	M	H	2016-08-30	0830M01H	52.5718
comp55959_c0_seq1	M	H	2016-08-30	0830M01H	6789.27
comp56496_c0_seq4	M	H	2016-08-30	0830M01H	73.4336
comp56747_c2_seq2	M	H	2016-08-30	0830M01H	1962.68
comp57952_c3_seq2	M	H	2016-08-30	0830M01H	56.7441
comp59049_c0_seq1	M	H	2016-08-30	0830M01H	9043.18
comp60397_c0_seq1	M	H	2016-08-30	0830M01H	101.806
comp62130_c0_seq4	M	H	2016-08-30	0830M01H	2851.39
comp63155_c0_seq11	M	H	2016-08-30	0830M01H	5667.74
comp64021_c3_seq1	M	H	2016-08-30	0830M01H	5147.03
comp65435_c0_seq8	M	H	2016-08-30	0830M01H	377.182
comp65993_c0_seq6	M	H	2016-08-30	0830M01H	1091.49
vitelline egg coat protein	M	H	2016-08-30	0830M01H	9078.23
0_0_CCAG28737.b1_CAYC_CAYF_CCAG	M	H	2016-08-30	0830M02H	1544.92
1252_1_CAYC_CAYF_CCAG	M	H	2016-08-30	0830M02H	651.526
13341_0_CCAG36642.b1_CAYC_CAYF_CCAG	M	H	2016-08-30	0830M02H	819.31
1432_1_CAYC_CAYF_CCAG	M	H	2016-08-30	0830M02H	1488.27
14392_1_CAYC_CAYF_CCAG	M	H	2016-08-30	0830M02H	164.879
14490_0_CCAG5543.g1_CAYC_CAYF_CCAG	M	H	2016-08-30	0830M02H	77.7183
14756_0_CCAG9200.b3_CAYC_CAYF_CCAG	M	H	2016-08-30	0830M02H	376.97
14_5_CAYC_CAYF_CCAG	M	H	2016-08-30	0830M02H	99.5084
178_9_CAYC_CAYF_CCAG	M	H	2016-08-30	0830M02H	4848.31
1837_1_CAYC_CAYF_CCAG	M	H	2016-08-30	0830M02H	5069.12
2202_1_CAYC_CAYF_CCAG	M	H	2016-08-30	0830M02H	3279.42
2758_1_CAYC_CAYF_CCAG	M	H	2016-08-30	0830M02H	8209.81
3397_1_CAYC_CAYF_CCAG	M	H	2016-08-30	0830M02H	1818.03
3924_1_CAYC_CAYF_CCAG	M	H	2016-08-30	0830M02H	828.753
CCAG48604	M	H	2016-08-30	0830M02H	163820
Vitellogenin_common	M	H	2016-08-30	0830M02H	59.5598
Vitellogenin_unique	M	H	2016-08-30	0830M02H	23.9692
comp50435_c1_seq2	M	H	2016-08-30	0830M02H	40637.9
comp55113_c2_seq1	M	H	2016-08-30	0830M02H	1708.35
comp55834_c0_seq3	M	H	2016-08-30	0830M02H	388.591
comp55959_c0_seq1	M	H	2016-08-30	0830M02H	22973.4
comp56496_c0_seq4	M	H	2016-08-30	0830M02H	35.5906
comp56747_c2_seq2	M	H	2016-08-30	0830M02H	1494.08
comp57952_c3_seq2	M	H	2016-08-30	0830M02H	74.8129
comp59049_c0_seq1	M	H	2016-08-30	0830M02H	23367.8
comp60397_c0_seq1	M	H	2016-08-30	0830M02H	257.85
comp62130_c0_seq4	M	H	2016-08-30	0830M02H	6736.79
comp63155_c0_seq11	M	H	2016-08-30	0830M02H	16187.2
comp64021_c3_seq1	M	H	2016-08-30	0830M02H	7230.7
comp65435_c0_seq8	M	H	2016-08-30	0830M02H	664.6
comp65993_c0_seq6	M	H	2016-08-30	0830M02H	1056.82
vitelline egg coat protein	M	H	2016-08-30	0830M02H	3282.33
0_0_CCAG28737.b1_CAYC_CAYF_CCAG	M	H	2016-08-30	0830M03H	1085.19
1252_1_CAYC_CAYF_CCAG	M	H	2016-08-30	0830M03H	1279.35
13341_0_CCAG36642.b1_CAYC_CAYF_CCAG	M	H	2016-08-30	0830M03H	1018.21
1432_1_CAYC_CAYF_CCAG	M	H	2016-08-30	0830M03H	1742.93
14392_1_CAYC_CAYF_CCAG	M	H	2016-08-30	0830M03H	180.614
14490_0_CCAG5543.g1_CAYC_CAYF_CCAG	M	H	2016-08-30	0830M03H	103.853
14756_0_CCAG9200.b3_CAYC_CAYF_CCAG	M	H	2016-08-30	0830M03H	269.416
14_5_CAYC_CAYF_CCAG	M	H	2016-08-30	0830M03H	1588.65
178_9_CAYC_CAYF_CCAG	M	H	2016-08-30	0830M03H	6976.98
1837_1_CAYC_CAYF_CCAG	M	H	2016-08-30	0830M03H	2494.73
2202_1_CAYC_CAYF_CCAG	M	H	2016-08-30	0830M03H	3551.33
2758_1_CAYC_CAYF_CCAG	M	H	2016-08-30	0830M03H	7961.32
3397_1_CAYC_CAYF_CCAG	M	H	2016-08-30	0830M03H	2001.81
3924_1_CAYC_CAYF_CCAG	M	H	2016-08-30	0830M03H	602.8
CCAG48604	M	H	2016-08-30	0830M03H	221209
Vitellogenin_common	M	H	2016-08-30	0830M03H	66.2252
Vitellogenin_unique	M	H	2016-08-30	0830M03H	53.4317
comp50435_c1_seq2	M	H	2016-08-30	0830M03H	53029.1
comp55113_c2_seq1	M	H	2016-08-30	0830M03H	1498.35
comp55834_c0_seq3	M	H	2016-08-30	0830M03H	246.087
comp55959_c0_seq1	M	H	2016-08-30	0830M03H	18680
comp56496_c0_seq4	M	H	2016-08-30	0830M03H	48.9163
comp56747_c2_seq2	M	H	2016-08-30	0830M03H	1018.21
comp57952_c3_seq2	M	H	2016-08-30	0830M03H	78.2662
comp59049_c0_seq1	M	H	2016-08-30	0830M03H	14038.2
comp60397_c0_seq1	M	H	2016-08-30	0830M03H	491.421
comp62130_c0_seq4	M	H	2016-08-30	0830M03H	5878.24
comp63155_c0_seq11	M	H	2016-08-30	0830M03H	14704.3
comp64021_c3_seq1	M	H	2016-08-30	0830M03H	6435.13
comp65435_c0_seq8	M	H	2016-08-30	0830M03H	493.679
comp65993_c0_seq6	M	H	2016-08-30	0830M03H	1073.9
vitelline egg coat protein	M	H	2016-08-30	0830M03H	2973.36
0_0_CCAG28737.b1_CAYC_CAYF_CCAG	M	H	2016-08-30	0830M04H	1714.48
1252_1_CAYC_CAYF_CCAG	M	H	2016-08-30	0830M04H	3353
13341_0_CCAG36642.b1_CAYC_CAYF_CCAG	M	H	2016-08-30	0830M04H	862.756
1432_1_CAYC_CAYF_CCAG	M	H	2016-08-30	0830M04H	734.219
14392_1_CAYC_CAYF_CCAG	M	H	2016-08-30	0830M04H	133346
14490_0_CCAG5543.g1_CAYC_CAYF_CCAG	M	H	2016-08-30	0830M04H	104.517
14756_0_CCAG9200.b3_CAYC_CAYF_CCAG	M	H	2016-08-30	0830M04H	2.59671
14_5_CAYC_CAYF_CCAG	M	H	2016-08-30	0830M04H	4069.04
178_9_CAYC_CAYF_CCAG	M	H	2016-08-30	0830M04H	15742.5
1837_1_CAYC_CAYF_CCAG	M	H	2016-08-30	0830M04H	12572
2202_1_CAYC_CAYF_CCAG	M	H	2016-08-30	0830M04H	9767.51
2758_1_CAYC_CAYF_CCAG	M	H	2016-08-30	0830M04H	7864.13
3397_1_CAYC_CAYF_CCAG	M	H	2016-08-30	0830M04H	1859.89
3924_1_CAYC_CAYF_CCAG	M	H	2016-08-30	0830M04H	82.4454
CCAG48604	M	H	2016-08-30	0830M04H	129633
Vitellogenin_common	M	H	2016-08-30	0830M04H	9498.75
Vitellogenin_unique	M	H	2016-08-30	0830M04H	9024.85
comp50435_c1_seq2	M	H	2016-08-30	0830M04H	6628.74
comp55113_c2_seq1	M	H	2016-08-30	0830M04H	10575.7
comp55834_c0_seq3	M	H	2016-08-30	0830M04H	149.311
comp55959_c0_seq1	M	H	2016-08-30	0830M04H	4962.31
comp56496_c0_seq4	M	H	2016-08-30	0830M04H	79.8487
comp56747_c2_seq2	M	H	2016-08-30	0830M04H	2252.64
comp57952_c3_seq2	M	H	2016-08-30	0830M04H	53.8817
comp59049_c0_seq1	M	H	2016-08-30	0830M04H	59643.8
comp60397_c0_seq1	M	H	2016-08-30	0830M04H	145.416
comp62130_c0_seq4	M	H	2016-08-30	0830M04H	2333.79
comp63155_c0_seq11	M	H	2016-08-30	0830M04H	4831.82
comp64021_c3_seq1	M	H	2016-08-30	0830M04H	3985.3
comp65435_c0_seq8	M	H	2016-08-30	0830M04H	566.082
comp65993_c0_seq6	M	H	2016-08-30	0830M04H	930.919
vitelline egg coat protein	M	H	2016-08-30	0830M04H	3839.88
0_0_CCAG28737.b1_CAYC_CAYF_CCAG	M	H	2016-08-30	0830M05H	1524.22
1252_1_CAYC_CAYF_CCAG	M	H	2016-08-30	0830M05H	2850.24
13341_0_CCAG36642.b1_CAYC_CAYF_CCAG	M	H	2016-08-30	0830M05H	683.786
1432_1_CAYC_CAYF_CCAG	M	H	2016-08-30	0830M05H	687.191
14392_1_CAYC_CAYF_CCAG	M	H	2016-08-30	0830M05H	56176.7
14490_0_CCAG5543.g1_CAYC_CAYF_CCAG	M	H	2016-08-30	0830M05H	95.3487
14756_0_CCAG9200.b3_CAYC_CAYF_CCAG	M	H	2016-08-30	0830M05H	6.12956
14_5_CAYC_CAYF_CCAG	M	H	2016-08-30	0830M05H	2142.62
178_9_CAYC_CAYF_CCAG	M	H	2016-08-30	0830M05H	20938.6
1837_1_CAYC_CAYF_CCAG	M	H	2016-08-30	0830M05H	11330.8
2202_1_CAYC_CAYF_CCAG	M	H	2016-08-30	0830M05H	10894.9
2758_1_CAYC_CAYF_CCAG	M	H	2016-08-30	0830M05H	14601.3
3397_1_CAYC_CAYF_CCAG	M	H	2016-08-30	0830M05H	2473.62
3924_1_CAYC_CAYF_CCAG	M	H	2016-08-30	0830M05H	72.8736
CCAG48604	M	H	2016-08-30	0830M05H	184067
Vitellogenin_common	M	H	2016-08-30	0830M05H	350.066
Vitellogenin_unique	M	H	2016-08-30	0830M05H	306.478
comp50435_c1_seq2	M	H	2016-08-30	0830M05H	650.414
comp55113_c2_seq1	M	H	2016-08-30	0830M05H	5178.11
comp55834_c0_seq3	M	H	2016-08-30	0830M05H	189.335
comp55959_c0_seq1	M	H	2016-08-30	0830M05H	6006.97
comp56496_c0_seq4	M	H	2016-08-30	0830M05H	60.6145
comp56747_c2_seq2	M	H	2016-08-30	0830M05H	2171.22
comp57952_c3_seq2	M	H	2016-08-30	0830M05H	56.5281
comp59049_c0_seq1	M	H	2016-08-30	0830M05H	34869.7
comp60397_c0_seq1	M	H	2016-08-30	0830M05H	143.704
comp62130_c0_seq4	M	H	2016-08-30	0830M05H	2313.57
comp63155_c0_seq11	M	H	2016-08-30	0830M05H	5417.17
comp64021_c3_seq1	M	H	2016-08-30	0830M05H	4540.64
comp65435_c0_seq8	M	H	2016-08-30	0830M05H	431.112
comp65993_c0_seq6	M	H	2016-08-30	0830M05H	1084.93
vitelline egg coat protein	M	H	2016-08-30	0830M05H	5831.93
0_0_CCAG28737.b1_CAYC_CAYF_CCAG	F	H	2016-12-22	1222F03H	1909.72
1252_1_CAYC_CAYF_CCAG	F	H	2016-12-22	1222F03H	4605.42
13341_0_CCAG36642.b1_CAYC_CAYF_CCAG	F	H	2016-12-22	1222F03H	698.885
1432_1_CAYC_CAYF_CCAG	F	H	2016-12-22	1222F03H	751.992
14392_1_CAYC_CAYF_CCAG	F	H	2016-12-22	1222F03H	57355.3
14490_0_CCAG5543.g1_CAYC_CAYF_CCAG	F	H	2016-12-22	1222F03H	267.658
14756_0_CCAG9200.b3_CAYC_CAYF_CCAG	F	H	2016-12-22	1222F03H	8.49708
14_5_CAYC_CAYF_CCAG	F	H	2016-12-22	1222F03H	278.279
178_9_CAYC_CAYF_CCAG	F	H	2016-12-22	1222F03H	80892.2
1837_1_CAYC_CAYF_CCAG	F	H	2016-12-22	1222F03H	7502.92
2202_1_CAYC_CAYF_CCAG	F	H	2016-12-22	1222F03H	8161.45
2758_1_CAYC_CAYF_CCAG	F	H	2016-12-22	1222F03H	16705.3
3397_1_CAYC_CAYF_CCAG	F	H	2016-12-22	1222F03H	1854.49
3924_1_CAYC_CAYF_CCAG	F	H	2016-12-22	1222F03H	99.8407
CCAG48604	F	H	2016-12-22	1222F03H	130381
Vitellogenin_common	F	H	2016-12-22	1222F03H	938518
Vitellogenin_unique	F	H	2016-12-22	1222F03H	814696
comp50435_c1_seq2	F	H	2016-12-22	1222F03H	280.404
comp55113_c2_seq1	F	H	2016-12-22	1222F03H	3609.14
comp55834_c0_seq3	F	H	2016-12-22	1222F03H	613.914
comp55959_c0_seq1	F	H	2016-12-22	1222F03H	5508.23
comp56496_c0_seq4	F	H	2016-12-22	1222F03H	48.8582
comp56747_c2_seq2	F	H	2016-12-22	1222F03H	1820.5
comp57952_c3_seq2	F	H	2016-12-22	1222F03H	29.7398
comp59049_c0_seq1	F	H	2016-12-22	1222F03H	4114.71
comp60397_c0_seq1	F	H	2016-12-22	1222F03H	140.202
comp62130_c0_seq4	F	H	2016-12-22	1222F03H	2149.76
comp63155_c0_seq11	F	H	2016-12-22	1222F03H	4545.94
comp64021_c3_seq1	F	H	2016-12-22	1222F03H	4618.16
comp65435_c0_seq8	F	H	2016-12-22	1222F03H	365.375
comp65993_c0_seq6	F	H	2016-12-22	1222F03H	1389.27
vitelline egg coat protein	F	H	2016-12-22	1222F03H	8747.75
0_0_CCAG28737.b1_CAYC_CAYF_CCAG	F	L	2016-12-22	1222F03L	1066.17
1252_1_CAYC_CAYF_CCAG	F	L	2016-12-22	1222F03L	2133.21
13341_0_CCAG36642.b1_CAYC_CAYF_CCAG	F	L	2016-12-22	1222F03L	589.909
1432_1_CAYC_CAYF_CCAG	F	L	2016-12-22	1222F03L	647.165
14392_1_CAYC_CAYF_CCAG	F	L	2016-12-22	1222F03L	41081.9
14490_0_CCAG5543.g1_CAYC_CAYF_CCAG	F	L	2016-12-22	1222F03L	62.4609
14756_0_CCAG9200.b3_CAYC_CAYF_CCAG	F	L	2016-12-22	1222F03L	3.47005
14_5_CAYC_CAYF_CCAG	F	L	2016-12-22	1222F03L	36.4355
178_9_CAYC_CAYF_CCAG	F	L	2016-12-22	1222F03L	51326.4
1837_1_CAYC_CAYF_CCAG	F	L	2016-12-22	1222F03L	9468.04
2202_1_CAYC_CAYF_CCAG	F	L	2016-12-22	1222F03L	10213.2
2758_1_CAYC_CAYF_CCAG	F	L	2016-12-22	1222F03L	14831.9
3397_1_CAYC_CAYF_CCAG	F	L	2016-12-22	1222F03L	2034.32
3924_1_CAYC_CAYF_CCAG	F	L	2016-12-22	1222F03L	85.0163
CCAG48604	F	L	2016-12-22	1222F03L	155862
Vitellogenin_common	F	L	2016-12-22	1222F03L	54067.7
Vitellogenin_unique	F	L	2016-12-22	1222F03L	54279.4
comp50435_c1_seq2	F	L	2016-12-22	1222F03L	53.7858
comp55113_c2_seq1	F	L	2016-12-22	1222F03L	3686.06
comp55834_c0_seq3	F	L	2016-12-22	1222F03L	58.1234
comp55959_c0_seq1	F	L	2016-12-22	1222F03L	7178.67
comp56496_c0_seq4	F	L	2016-12-22	1222F03L	54.6533
comp56747_c2_seq2	F	L	2016-12-22	1222F03L	2041.26
comp57952_c3_seq2	F	L	2016-12-22	1222F03L	35.568
comp59049_c0_seq1	F	L	2016-12-22	1222F03L	1802.69
comp60397_c0_seq1	F	L	2016-12-22	1222F03L	64.196
comp62130_c0_seq4	F	L	2016-12-22	1222F03L	2855.85
comp63155_c0_seq11	F	L	2016-12-22	1222F03L	5814.07
comp64021_c3_seq1	F	L	2016-12-22	1222F03L	4686.31
comp65435_c0_seq8	F	L	2016-12-22	1222F03L	427.684
comp65993_c0_seq6	F	L	2016-12-22	1222F03L	1046.22
vitelline egg coat protein	F	L	2016-12-22	1222F03L	7329.62
0_0_CCAG28737.b1_CAYC_CAYF_CCAG	F	L	2016-08-30	0830F01L	2382.93
1252_1_CAYC_CAYF_CCAG	F	L	2016-08-30	0830F01L	4011.26
13341_0_CCAG36642.b1_CAYC_CAYF_CCAG	F	L	2016-08-30	0830F01L	579.846
1432_1_CAYC_CAYF_CCAG	F	L	2016-08-30	0830F01L	753.459
14392_1_CAYC_CAYF_CCAG	F	L	2016-08-30	0830F01L	109717
14490_0_CCAG5543.g1_CAYC_CAYF_CCAG	F	L	2016-08-30	0830F01L	138.437
14756_0_CCAG9200.b3_CAYC_CAYF_CCAG	F	L	2016-08-30	0830F01L	1.13473
14_5_CAYC_CAYF_CCAG	F	L	2016-08-30	0830F01L	987.213
178_9_CAYC_CAYF_CCAG	F	L	2016-08-30	0830F01L	77480.4
1837_1_CAYC_CAYF_CCAG	F	L	2016-08-30	0830F01L	12379.9
2202_1_CAYC_CAYF_CCAG	F	L	2016-08-30	0830F01L	11581
2758_1_CAYC_CAYF_CCAG	F	L	2016-08-30	0830F01L	12485.4
3397_1_CAYC_CAYF_CCAG	F	L	2016-08-30	0830F01L	1754.29
3924_1_CAYC_CAYF_CCAG	F	L	2016-08-30	0830F01L	122.551
CCAG48604	F	L	2016-08-30	0830F01L	181155
Vitellogenin_common	F	L	2016-08-30	0830F01L	317340
Vitellogenin_unique	F	L	2016-08-30	0830F01L	295516
comp50435_c1_seq2	F	L	2016-08-30	0830F01L	141.841
comp55113_c2_seq1	F	L	2016-08-30	0830F01L	3800.2
comp55834_c0_seq3	F	L	2016-08-30	0830F01L	203.116
comp55959_c0_seq1	F	L	2016-08-30	0830F01L	6604.12
comp56496_c0_seq4	F	L	2016-08-30	0830F01L	81.7004
comp56747_c2_seq2	F	L	2016-08-30	0830F01L	2211.59
comp57952_c3_seq2	F	L	2016-08-30	0830F01L	78.2962
comp59049_c0_seq1	F	L	2016-08-30	0830F01L	2531.58
comp60397_c0_seq1	F	L	2016-08-30	0830F01L	73.7573
comp62130_c0_seq4	F	L	2016-08-30	0830F01L	3240.78
comp63155_c0_seq11	F	L	2016-08-30	0830F01L	6404.41
comp64021_c3_seq1	F	L	2016-08-30	0830F01L	5185.71
comp65435_c0_seq8	F	L	2016-08-30	0830F01L	542.4
comp65993_c0_seq6	F	L	2016-08-30	0830F01L	1211.89
vitelline egg coat protein	F	L	2016-08-30	0830F01L	9533.99
0_0_CCAG28737.b1_CAYC_CAYF_CCAG	F	L	2016-08-30	0830F02L	3528.91
1252_1_CAYC_CAYF_CCAG	F	L	2016-08-30	0830F02L	2984.04
13341_0_CCAG36642.b1_CAYC_CAYF_CCAG	F	L	2016-08-30	0830F02L	612.419
1432_1_CAYC_CAYF_CCAG	F	L	2016-08-30	0830F02L	681.466
14392_1_CAYC_CAYF_CCAG	F	L	2016-08-30	0830F02L	83571.2
14490_0_CCAG5543.g1_CAYC_CAYF_CCAG	F	L	2016-08-30	0830F02L	168.115
14756_0_CCAG9200.b3_CAYC_CAYF_CCAG	F	L	2016-08-30	0830F02L	3.00205
14_5_CAYC_CAYF_CCAG	F	L	2016-08-30	0830F02L	600.411
178_9_CAYC_CAYF_CCAG	F	L	2016-08-30	0830F02L	41820.1
1837_1_CAYC_CAYF_CCAG	F	L	2016-08-30	0830F02L	13794.4
2202_1_CAYC_CAYF_CCAG	F	L	2016-08-30	0830F02L	10247.5
2758_1_CAYC_CAYF_CCAG	F	L	2016-08-30	0830F02L	9759.68
3397_1_CAYC_CAYF_CCAG	F	L	2016-08-30	0830F02L	1628.61
3924_1_CAYC_CAYF_CCAG	F	L	2016-08-30	0830F02L	121.583
CCAG48604	F	L	2016-08-30	0830F02L	241398
Vitellogenin_common	F	L	2016-08-30	0830F02L	467405
Vitellogenin_unique	F	L	2016-08-30	0830F02L	431608
comp50435_c1_seq2	F	L	2016-08-30	0830F02L	181.624
comp55113_c2_seq1	F	L	2016-08-30	0830F02L	3146.15
comp55834_c0_seq3	F	L	2016-08-30	0830F02L	288.197
comp55959_c0_seq1	F	L	2016-08-30	0830F02L	8650.42
comp56496_c0_seq4	F	L	2016-08-30	0830F02L	94.5647
comp56747_c2_seq2	F	L	2016-08-30	0830F02L	2131.46
comp57952_c3_seq2	F	L	2016-08-30	0830F02L	75.0513
comp59049_c0_seq1	F	L	2016-08-30	0830F02L	4249.41
comp60397_c0_seq1	F	L	2016-08-30	0830F02L	105.072
comp62130_c0_seq4	F	L	2016-08-30	0830F02L	3473.38
comp63155_c0_seq11	F	L	2016-08-30	0830F02L	6781.64
comp64021_c3_seq1	F	L	2016-08-30	0830F02L	5044.95
comp65435_c0_seq8	F	L	2016-08-30	0830F02L	565.887
comp65993_c0_seq6	F	L	2016-08-30	0830F02L	1263.86
vitelline egg coat protein	F	L	2016-08-30	0830F02L	12631.1
0_0_CCAG28737.b1_CAYC_CAYF_CCAG	F	L	2016-08-30	0830F03L	2282.11
1252_1_CAYC_CAYF_CCAG	F	L	2016-08-30	0830F03L	4285.28
13341_0_CCAG36642.b1_CAYC_CAYF_CCAG	F	L	2016-08-30	0830F03L	623.784
1432_1_CAYC_CAYF_CCAG	F	L	2016-08-30	0830F03L	828.574
14392_1_CAYC_CAYF_CCAG	F	L	2016-08-30	0830F03L	120250
14490_0_CCAG5543.g1_CAYC_CAYF_CCAG	F	L	2016-08-30	0830F03L	62.3784
14756_0_CCAG9200.b3_CAYC_CAYF_CCAG	F	L	2016-08-30	0830F03L	7.06171
14_5_CAYC_CAYF_CCAG	F	L	2016-08-30	0830F03L	22.3621
178_9_CAYC_CAYF_CCAG	F	L	2016-08-30	0830F03L	23118.9
1837_1_CAYC_CAYF_CCAG	F	L	2016-08-30	0830F03L	16197.2
2202_1_CAYC_CAYF_CCAG	F	L	2016-08-30	0830F03L	12811.1
2758_1_CAYC_CAYF_CCAG	F	L	2016-08-30	0830F03L	9860.5
3397_1_CAYC_CAYF_CCAG	F	L	2016-08-30	0830F03L	2137.34
3924_1_CAYC_CAYF_CCAG	F	L	2016-08-30	0830F03L	104.749
CCAG48604	F	L	2016-08-30	0830F03L	231732
Vitellogenin_common	F	L	2016-08-30	0830F03L	15822.9
Vitellogenin_unique	F	L	2016-08-30	0830F03L	16259.6
comp50435_c1_seq2	F	L	2016-08-30	0830F03L	131.819
comp55113_c2_seq1	F	L	2016-08-30	0830F03L	3320.18
comp55834_c0_seq3	F	L	2016-08-30	0830F03L	80.0327
comp55959_c0_seq1	F	L	2016-08-30	0830F03L	6678.02
comp56496_c0_seq4	F	L	2016-08-30	0830F03L	97.687
comp56747_c2_seq2	F	L	2016-08-30	0830F03L	2601.06
comp57952_c3_seq2	F	L	2016-08-30	0830F03L	62.3784
comp59049_c0_seq1	F	L	2016-08-30	0830F03L	19786.9
comp60397_c0_seq1	F	L	2016-08-30	0830F03L	96.51
comp62130_c0_seq4	F	L	2016-08-30	0830F03L	2741.12
comp63155_c0_seq11	F	L	2016-08-30	0830F03L	6074.25
comp64021_c3_seq1	F	L	2016-08-30	0830F03L	3999.28
comp65435_c0_seq8	F	L	2016-08-30	0830F03L	592.007
comp65993_c0_seq6	F	L	2016-08-30	0830F03L	1052.19
vitelline egg coat protein	F	L	2016-08-30	0830F03L	10824.4
0_0_CCAG28737.b1_CAYC_CAYF_CCAG	F	L	2016-08-30	0830F04L	2207.43
1252_1_CAYC_CAYF_CCAG	F	L	2016-08-30	0830F04L	2090.03
13341_0_CCAG36642.b1_CAYC_CAYF_CCAG	F	L	2016-08-30	0830F04L	549.85
1432_1_CAYC_CAYF_CCAG	F	L	2016-08-30	0830F04L	648.181
14392_1_CAYC_CAYF_CCAG	F	L	2016-08-30	0830F04L	55023.1
14490_0_CCAG5543.g1_CAYC_CAYF_CCAG	F	L	2016-08-30	0830F04L	73.2465
14756_0_CCAG9200.b3_CAYC_CAYF_CCAG	F	L	2016-08-30	0830F04L	1.00338
14_5_CAYC_CAYF_CCAG	F	L	2016-08-30	0830F04L	919.093
178_9_CAYC_CAYF_CCAG	F	L	2016-08-30	0830F04L	29133
1837_1_CAYC_CAYF_CCAG	F	L	2016-08-30	0830F04L	11434.5
2202_1_CAYC_CAYF_CCAG	F	L	2016-08-30	0830F04L	11881
2758_1_CAYC_CAYF_CCAG	F	L	2016-08-30	0830F04L	11213.7
3397_1_CAYC_CAYF_CCAG	F	L	2016-08-30	0830F04L	1727.81
3924_1_CAYC_CAYF_CCAG	F	L	2016-08-30	0830F04L	134.452
CCAG48604	F	L	2016-08-30	0830F04L	268203
Vitellogenin_common	F	L	2016-08-30	0830F04L	116438
Vitellogenin_unique	F	L	2016-08-30	0830F04L	119703
comp50435_c1_seq2	F	L	2016-08-30	0830F04L	475.6
comp55113_c2_seq1	F	L	2016-08-30	0830F04L	3907.15
comp55834_c0_seq3	F	L	2016-08-30	0830F04L	123.415
comp55959_c0_seq1	F	L	2016-08-30	0830F04L	7752.08
comp56496_c0_seq4	F	L	2016-08-30	0830F04L	83.2802
comp56747_c2_seq2	F	L	2016-08-30	0830F04L	2104.08
comp57952_c3_seq2	F	L	2016-08-30	0830F04L	65.2195
comp59049_c0_seq1	F	L	2016-08-30	0830F04L	18073.8
comp60397_c0_seq1	F	L	2016-08-30	0830F04L	107.361
comp62130_c0_seq4	F	L	2016-08-30	0830F04L	3092.41
comp63155_c0_seq11	F	L	2016-08-30	0830F04L	5862.73
comp64021_c3_seq1	F	L	2016-08-30	0830F04L	4989.79
comp65435_c0_seq8	F	L	2016-08-30	0830F04L	439.479
comp65993_c0_seq6	F	L	2016-08-30	0830F04L	1061.57
vitelline egg coat protein	F	L	2016-08-30	0830F04L	7191.2
0_0_CCAG28737.b1_CAYC_CAYF_CCAG	F	L	2016-08-30	0830F05L	1803.08
1252_1_CAYC_CAYF_CCAG	F	L	2016-08-30	0830F05L	1218.06
13341_0_CCAG36642.b1_CAYC_CAYF_CCAG	F	L	2016-08-30	0830F05L	459.374
1432_1_CAYC_CAYF_CCAG	F	L	2016-08-30	0830F05L	538.604
14392_1_CAYC_CAYF_CCAG	F	L	2016-08-30	0830F05L	44019.1
14490_0_CCAG5543.g1_CAYC_CAYF_CCAG	F	L	2016-08-30	0830F05L	34.4131
14756_0_CCAG9200.b3_CAYC_CAYF_CCAG	F	L	2016-08-30	0830F05L	3.20121
14_5_CAYC_CAYF_CCAG	F	L	2016-08-30	0830F05L	813.108
178_9_CAYC_CAYF_CCAG	F	L	2016-08-30	0830F05L	51185.8
1837_1_CAYC_CAYF_CCAG	F	L	2016-08-30	0830F05L	10561.6
2202_1_CAYC_CAYF_CCAG	F	L	2016-08-30	0830F05L	4763.41
2758_1_CAYC_CAYF_CCAG	F	L	2016-08-30	0830F05L	13928.5
3397_1_CAYC_CAYF_CCAG	F	L	2016-08-30	0830F05L	2013.56
3924_1_CAYC_CAYF_CCAG	F	L	2016-08-30	0830F05L	106.44
CCAG48604	F	L	2016-08-30	0830F05L	192205
Vitellogenin_common	F	L	2016-08-30	0830F05L	2613.79
Vitellogenin_unique	F	L	2016-08-30	0830F05L	2408.91
comp50435_c1_seq2	F	L	2016-08-30	0830F05L	28.8109
comp55113_c2_seq1	F	L	2016-08-30	0830F05L	2817.07
comp55834_c0_seq3	F	L	2016-08-30	0830F05L	12.8049
comp55959_c0_seq1	F	L	2016-08-30	0830F05L	7573.27
comp56496_c0_seq4	F	L	2016-08-30	0830F05L	59.2225
comp56747_c2_seq2	F	L	2016-08-30	0830F05L	2304.07
comp57952_c3_seq2	F	L	2016-08-30	0830F05L	48.8185
comp59049_c0_seq1	F	L	2016-08-30	0830F05L	176.867
comp60397_c0_seq1	F	L	2016-08-30	0830F05L	50.4191
comp62130_c0_seq4	F	L	2016-08-30	0830F05L	3167.6
comp63155_c0_seq11	F	L	2016-08-30	0830F05L	5858.22
comp64021_c3_seq1	F	L	2016-08-30	0830F05L	4136.77
comp65435_c0_seq8	F	L	2016-08-30	0830F05L	481.783
comp65993_c0_seq6	F	L	2016-08-30	0830F05L	1020.39
vitelline egg coat protein	F	L	2016-08-30	0830F05L	10135
0_0_CCAG28737.b1_CAYC_CAYF_CCAG	M	L	2016-08-30	0830M01L	1790.52
1252_1_CAYC_CAYF_CCAG	M	L	2016-08-30	0830M01L	519.081
13341_0_CCAG36642.b1_CAYC_CAYF_CCAG	M	L	2016-08-30	0830M01L	555.586
1432_1_CAYC_CAYF_CCAG	M	L	2016-08-30	0830M01L	442.51
14392_1_CAYC_CAYF_CCAG	M	L	2016-08-30	0830M01L	814.681
14490_0_CCAG5543.g1_CAYC_CAYF_CCAG	M	L	2016-08-30	0830M01L	98.8301
14756_0_CCAG9200.b3_CAYC_CAYF_CCAG	M	L	2016-08-30	0830M01L	497.712
14_5_CAYC_CAYF_CCAG	M	L	2016-08-30	0830M01L	952.687
178_9_CAYC_CAYF_CCAG	M	L	2016-08-30	0830M01L	56823.8
1837_1_CAYC_CAYF_CCAG	M	L	2016-08-30	0830M01L	8787.87
2202_1_CAYC_CAYF_CCAG	M	L	2016-08-30	0830M01L	12010.1
2758_1_CAYC_CAYF_CCAG	M	L	2016-08-30	0830M01L	17119
3397_1_CAYC_CAYF_CCAG	M	L	2016-08-30	0830M01L	2065.64
3924_1_CAYC_CAYF_CCAG	M	L	2016-08-30	0830M01L	1275.89
CCAG48604	M	L	2016-08-30	0830M01L	242723
Vitellogenin_common	M	L	2016-08-30	0830M01L	285.806
Vitellogenin_unique	M	L	2016-08-30	0830M01L	257.314
comp50435_c1_seq2	M	L	2016-08-30	0830M01L	100.611
comp55113_c2_seq1	M	L	2016-08-30	0830M01L	4697.55
comp55834_c0_seq3	M	L	2016-08-30	0830M01L	31.1627
comp55959_c0_seq1	M	L	2016-08-30	0830M01L	7066.8
comp56496_c0_seq4	M	L	2016-08-30	0830M01L	73.9
comp56747_c2_seq2	M	L	2016-08-30	0830M01L	1713.95
comp57952_c3_seq2	M	L	2016-08-30	0830M01L	43.6277
comp59049_c0_seq1	M	L	2016-08-30	0830M01L	5895.08
comp60397_c0_seq1	M	L	2016-08-30	0830M01L	160.265
comp62130_c0_seq4	M	L	2016-08-30	0830M01L	3132.29
comp63155_c0_seq11	M	L	2016-08-30	0830M01L	6328.69
comp64021_c3_seq1	M	L	2016-08-30	0830M01L	5213.96
comp65435_c0_seq8	M	L	2016-08-30	0830M01L	346.351
comp65993_c0_seq6	M	L	2016-08-30	0830M01L	946.454
vitelline egg coat protein	M	L	2016-08-30	0830M01L	8522.54
0_0_CCAG28737.b1_CAYC_CAYF_CCAG	M	L	2016-08-30	0830M02L	2316.64
1252_1_CAYC_CAYF_CCAG	M	L	2016-08-30	0830M02L	370.791
13341_0_CCAG36642.b1_CAYC_CAYF_CCAG	M	L	2016-08-30	0830M02L	512.234
1432_1_CAYC_CAYF_CCAG	M	L	2016-08-30	0830M02L	522.623
14392_1_CAYC_CAYF_CCAG	M	L	2016-08-30	0830M02L	194.186
14490_0_CCAG5543.g1_CAYC_CAYF_CCAG	M	L	2016-08-30	0830M02L	119.069
14756_0_CCAG9200.b3_CAYC_CAYF_CCAG	M	L	2016-08-30	0830M02L	200.579
14_5_CAYC_CAYF_CCAG	M	L	2016-08-30	0830M02L	984.513
178_9_CAYC_CAYF_CCAG	M	L	2016-08-30	0830M02L	31768.9
1837_1_CAYC_CAYF_CCAG	M	L	2016-08-30	0830M02L	9029.23
2202_1_CAYC_CAYF_CCAG	M	L	2016-08-30	0830M02L	13000
2758_1_CAYC_CAYF_CCAG	M	L	2016-08-30	0830M02L	14607.1
3397_1_CAYC_CAYF_CCAG	M	L	2016-08-30	0830M02L	2357.4
3924_1_CAYC_CAYF_CCAG	M	L	2016-08-30	0830M02L	572.168
CCAG48604	M	L	2016-08-30	0830M02L	255700
Vitellogenin_common	M	L	2016-08-30	0830M02L	106.283
Vitellogenin_unique	M	L	2016-08-30	0830M02L	71.9206
comp50435_c1_seq2	M	L	2016-08-30	0830M02L	385.974
comp55113_c2_seq1	M	L	2016-08-30	0830M02L	5577.84
comp55834_c0_seq3	M	L	2016-08-30	0830M02L	88.7021
comp55959_c0_seq1	M	L	2016-08-30	0830M02L	7350.28
comp56496_c0_seq4	M	L	2016-08-30	0830M02L	68.7241
comp56747_c2_seq2	M	L	2016-08-30	0830M02L	1786.83
comp57952_c3_seq2	M	L	2016-08-30	0830M02L	55.9382
comp59049_c0_seq1	M	L	2016-08-30	0830M02L	16593.7
comp60397_c0_seq1	M	L	2016-08-30	0830M02L	180.601
comp62130_c0_seq4	M	L	2016-08-30	0830M02L	3330.72
comp63155_c0_seq11	M	L	2016-08-30	0830M02L	6440.09
comp64021_c3_seq1	M	L	2016-08-30	0830M02L	5332.51
comp65435_c0_seq8	M	L	2016-08-30	0830M02L	313.254
comp65993_c0_seq6	M	L	2016-08-30	0830M02L	942.959
vitelline egg coat protein	M	L	2016-08-30	0830M02L	8365.96
0_0_CCAG28737.b1_CAYC_CAYF_CCAG	M	L	2016-08-30	0830M03L	512.759
1252_1_CAYC_CAYF_CCAG	M	L	2016-08-30	0830M03L	1122.5
13341_0_CCAG36642.b1_CAYC_CAYF_CCAG	M	L	2016-08-30	0830M03L	1535.75
1432_1_CAYC_CAYF_CCAG	M	L	2016-08-30	0830M03L	1764.3
14392_1_CAYC_CAYF_CCAG	M	L	2016-08-30	0830M03L	121.443
14490_0_CCAG5543.g1_CAYC_CAYF_CCAG	M	L	2016-08-30	0830M03L	86.0221
14756_0_CCAG9200.b3_CAYC_CAYF_CCAG	M	L	2016-08-30	0830M03L	843.354
14_5_CAYC_CAYF_CCAG	M	L	2016-08-30	0830M03L	576.854
178_9_CAYC_CAYF_CCAG	M	L	2016-08-30	0830M03L	9211.95
1837_1_CAYC_CAYF_CCAG	M	L	2016-08-30	0830M03L	3481.36
2202_1_CAYC_CAYF_CCAG	M	L	2016-08-30	0830M03L	8188.96
2758_1_CAYC_CAYF_CCAG	M	L	2016-08-30	0830M03L	9750.85
3397_1_CAYC_CAYF_CCAG	M	L	2016-08-30	0830M03L	2240.79
3924_1_CAYC_CAYF_CCAG	M	L	2016-08-30	0830M03L	2013.93
CCAG48604	M	L	2016-08-30	0830M03L	150239
Vitellogenin_common	M	L	2016-08-30	0830M03L	104.576
Vitellogenin_unique	M	L	2016-08-30	0830M03L	67.4683
comp50435_c1_seq2	M	L	2016-08-30	0830M03L	99999.8
comp55113_c2_seq1	M	L	2016-08-30	0830M03L	2181.76
comp55834_c0_seq3	M	L	2016-08-30	0830M03L	142.527
comp55959_c0_seq1	M	L	2016-08-30	0830M03L	16772.6
comp56496_c0_seq4	M	L	2016-08-30	0830M03L	43.011
comp56747_c2_seq2	M	L	2016-08-30	0830M03L	938.653
comp57952_c3_seq2	M	L	2016-08-30	0830M03L	41.3243
comp59049_c0_seq1	M	L	2016-08-30	0830M03L	8151.01
comp60397_c0_seq1	M	L	2016-08-30	0830M03L	841.667
comp62130_c0_seq4	M	L	2016-08-30	0830M03L	4898.2
comp63155_c0_seq11	M	L	2016-08-30	0830M03L	13656.4
comp64021_c3_seq1	M	L	2016-08-30	0830M03L	6848.87
comp65435_c0_seq8	M	L	2016-08-30	0830M03L	259.753
comp65993_c0_seq6	M	L	2016-08-30	0830M03L	1607.43
vitelline egg coat protein	M	L	2016-08-30	0830M03L	3682.08
0_0_CCAG28737.b1_CAYC_CAYF_CCAG	M	L	2016-08-30	0830M04L	2417.59
1252_1_CAYC_CAYF_CCAG	M	L	2016-08-30	0830M04L	621.314
13341_0_CCAG36642.b1_CAYC_CAYF_CCAG	M	L	2016-08-30	0830M04L	586.659
1432_1_CAYC_CAYF_CCAG	M	L	2016-08-30	0830M04L	517.349
14392_1_CAYC_CAYF_CCAG	M	L	2016-08-30	0830M04L	116.342
14490_0_CCAG5543.g1_CAYC_CAYF_CCAG	M	L	2016-08-30	0830M04L	109.741
14756_0_CCAG9200.b3_CAYC_CAYF_CCAG	M	L	2016-08-30	0830M04L	71.7852
14_5_CAYC_CAYF_CCAG	M	L	2016-08-30	0830M04L	2870.58
178_9_CAYC_CAYF_CCAG	M	L	2016-08-30	0830M04L	25012.6
1837_1_CAYC_CAYF_CCAG	M	L	2016-08-30	0830M04L	10605.2
2202_1_CAYC_CAYF_CCAG	M	L	2016-08-30	0830M04L	12079.7
2758_1_CAYC_CAYF_CCAG	M	L	2016-08-30	0830M04L	15120.3
3397_1_CAYC_CAYF_CCAG	M	L	2016-08-30	0830M04L	2156.03
3924_1_CAYC_CAYF_CCAG	M	L	2016-08-30	0830M04L	231.033
CCAG48604	M	L	2016-08-30	0830M04L	237026
Vitellogenin_common	M	L	2016-08-30	0830M04L	61.0587
Vitellogenin_unique	M	L	2016-08-30	0830M04L	29.7042
comp50435_c1_seq2	M	L	2016-08-30	0830M04L	472.792
comp55113_c2_seq1	M	L	2016-08-30	0830M04L	9317.23
comp55834_c0_seq3	M	L	2016-08-30	0830M04L	94.0634
comp55959_c0_seq1	M	L	2016-08-30	0830M04L	7913.7
comp56496_c0_seq4	M	L	2016-08-30	0830M04L	60.2336
comp56747_c2_seq2	M	L	2016-08-30	0830M04L	1858.99
comp57952_c3_seq2	M	L	2016-08-30	0830M04L	45.3815
comp59049_c0_seq1	M	L	2016-08-30	0830M04L	24175.9
comp60397_c0_seq1	M	L	2016-08-30	0830M04L	81.6867
comp62130_c0_seq4	M	L	2016-08-30	0830M04L	3326.87
comp63155_c0_seq11	M	L	2016-08-30	0830M04L	7085.29
comp64021_c3_seq1	M	L	2016-08-30	0830M04L	5331.09
comp65435_c0_seq8	M	L	2016-08-30	0830M04L	261.562
comp65993_c0_seq6	M	L	2016-08-30	0830M04L	1071
vitelline egg coat protein	M	L	2016-08-30	0830M04L	10616.8
0_0_CCAG28737.b1_CAYC_CAYF_CCAG	M	L	2016-08-30	0830M05L	1766.71
1252_1_CAYC_CAYF_CCAG	M	L	2016-08-30	0830M05L	908.763
13341_0_CCAG36642.b1_CAYC_CAYF_CCAG	M	L	2016-08-30	0830M05L	526.267
1432_1_CAYC_CAYF_CCAG	M	L	2016-08-30	0830M05L	484.139
14392_1_CAYC_CAYF_CCAG	M	L	2016-08-30	0830M05L	169.85
14490_0_CCAG5543.g1_CAYC_CAYF_CCAG	M	L	2016-08-30	0830M05L	76.9005
14756_0_CCAG9200.b3_CAYC_CAYF_CCAG	M	L	2016-08-30	0830M05L	299.578
14_5_CAYC_CAYF_CCAG	M	L	2016-08-30	0830M05L	1891.08
178_9_CAYC_CAYF_CCAG	M	L	2016-08-30	0830M05L	21546.9
1837_1_CAYC_CAYF_CCAG	M	L	2016-08-30	0830M05L	13747.1
2202_1_CAYC_CAYF_CCAG	M	L	2016-08-30	0830M05L	8681.06
2758_1_CAYC_CAYF_CCAG	M	L	2016-08-30	0830M05L	12472.6
3397_1_CAYC_CAYF_CCAG	M	L	2016-08-30	0830M05L	2209.38
3924_1_CAYC_CAYF_CCAG	M	L	2016-08-30	0830M05L	776.361
CCAG48604	M	L	2016-08-30	0830M05L	252289
Vitellogenin_common	M	L	2016-08-30	0830M05L	77.5692
Vitellogenin_unique	M	L	2016-08-30	0830M05L	72.8883
comp50435_c1_seq2	M	L	2016-08-30	0830M05L	223.346
comp55113_c2_seq1	M	L	2016-08-30	0830M05L	4201.44
comp55834_c0_seq3	M	L	2016-08-30	0830M05L	66.2013
comp55959_c0_seq1	M	L	2016-08-30	0830M05L	6905
comp56496_c0_seq4	M	L	2016-08-30	0830M05L	68.2074
comp56747_c2_seq2	M	L	2016-08-30	0830M05L	2042.21
comp57952_c3_seq2	M	L	2016-08-30	0830M05L	45.4716
comp59049_c0_seq1	M	L	2016-08-30	0830M05L	15652.9
comp60397_c0_seq1	M	L	2016-08-30	0830M05L	146.445
comp62130_c0_seq4	M	L	2016-08-30	0830M05L	3249.21
comp63155_c0_seq11	M	L	2016-08-30	0830M05L	5413.8
comp64021_c3_seq1	M	L	2016-08-30	0830M05L	5347.59
comp65435_c0_seq8	M	L	2016-08-30	0830M05L	355.748
comp65993_c0_seq6	M	L	2016-08-30	0830M05L	951.56
vitelline egg coat protein	M	L	2016-08-30	0830M05L	10005.8
0_0_CCAG28737.b1_CAYC_CAYF_CCAG	F	H	2016-12-22	1222F04H	1346.73
1252_1_CAYC_CAYF_CCAG	F	H	2016-12-22	1222F04H	3906.92
13341_0_CCAG36642.b1_CAYC_CAYF_CCAG	F	H	2016-12-22	1222F04H	489.15
1432_1_CAYC_CAYF_CCAG	F	H	2016-12-22	1222F04H	576.373
14392_1_CAYC_CAYF_CCAG	F	H	2016-12-22	1222F04H	67985.5
14490_0_CCAG5543.g1_CAYC_CAYF_CCAG	F	H	2016-12-22	1222F04H	53.0319
14756_0_CCAG9200.b3_CAYC_CAYF_CCAG	F	H	2016-12-22	1222F04H	3.48894
14_5_CAYC_CAYF_CCAG	F	H	2016-12-22	1222F04H	900.147
178_9_CAYC_CAYF_CCAG	F	H	2016-12-22	1222F04H	56426.7
1837_1_CAYC_CAYF_CCAG	F	H	2016-12-22	1222F04H	8915.64
2202_1_CAYC_CAYF_CCAG	F	H	2016-12-22	1222F04H	6931.83
2758_1_CAYC_CAYF_CCAG	F	H	2016-12-22	1222F04H	16047.7
3397_1_CAYC_CAYF_CCAG	F	H	2016-12-22	1222F04H	2094.06
3924_1_CAYC_CAYF_CCAG	F	H	2016-12-22	1222F04H	62.1032
CCAG48604	F	H	2016-12-22	1222F04H	115868
Vitellogenin_common	F	H	2016-12-22	1222F04H	24685
Vitellogenin_unique	F	H	2016-12-22	1222F04H	24849.6
comp50435_c1_seq2	F	H	2016-12-22	1222F04H	36.9828
comp55113_c2_seq1	F	H	2016-12-22	1222F04H	8820.74
comp55834_c0_seq3	F	H	2016-12-22	1222F04H	48.8452
comp55959_c0_seq1	F	H	2016-12-22	1222F04H	7192.11
comp56496_c0_seq4	F	H	2016-12-22	1222F04H	43.2629
comp56747_c2_seq2	F	H	2016-12-22	1222F04H	2086.39
comp57952_c3_seq2	F	H	2016-12-22	1222F04H	34.8894
comp59049_c0_seq1	F	H	2016-12-22	1222F04H	1902.17
comp60397_c0_seq1	F	H	2016-12-22	1222F04H	77.4545
comp62130_c0_seq4	F	H	2016-12-22	1222F04H	2483.43
comp63155_c0_seq11	F	H	2016-12-22	1222F04H	5374.37
comp64021_c3_seq1	F	H	2016-12-22	1222F04H	4279.54
comp65435_c0_seq8	F	H	2016-12-22	1222F04H	431.931
comp65993_c0_seq6	F	H	2016-12-22	1222F04H	1137.4
vitelline egg coat protein	F	H	2016-12-22	1222F04H	4245.35
0_0_CCAG28737.b1_CAYC_CAYF_CCAG	F	L	2016-12-22	1222F04L	961.691
1252_1_CAYC_CAYF_CCAG	F	L	2016-12-22	1222F04L	3075.69
13341_0_CCAG36642.b1_CAYC_CAYF_CCAG	F	L	2016-12-22	1222F04L	583.337
1432_1_CAYC_CAYF_CCAG	F	L	2016-12-22	1222F04L	688.701
14392_1_CAYC_CAYF_CCAG	F	L	2016-12-22	1222F04L	90520.6
14490_0_CCAG5543.g1_CAYC_CAYF_CCAG	F	L	2016-12-22	1222F04L	42.1458
14756_0_CCAG9200.b3_CAYC_CAYF_CCAG	F	L	2016-12-22	1222F04L	1.91572
14_5_CAYC_CAYF_CCAG	F	L	2016-12-22	1222F04L	1848.67
178_9_CAYC_CAYF_CCAG	F	L	2016-12-22	1222F04L	46214.8
1837_1_CAYC_CAYF_CCAG	F	L	2016-12-22	1222F04L	14220.4
2202_1_CAYC_CAYF_CCAG	F	L	2016-12-22	1222F04L	9801.78
2758_1_CAYC_CAYF_CCAG	F	L	2016-12-22	1222F04L	16187.8
3397_1_CAYC_CAYF_CCAG	F	L	2016-12-22	1222F04L	2117.83
3924_1_CAYC_CAYF_CCAG	F	L	2016-12-22	1222F04L	69.9238
CCAG48604	F	L	2016-12-22	1222F04L	132368
Vitellogenin_common	F	L	2016-12-22	1222F04L	1871.66
Vitellogenin_unique	F	L	2016-12-22	1222F04L	2164.76
comp50435_c1_seq2	F	L	2016-12-22	1222F04L	20.1151
comp55113_c2_seq1	F	L	2016-12-22	1222F04L	2894.65
comp55834_c0_seq3	F	L	2016-12-22	1222F04L	18.1993
comp55959_c0_seq1	F	L	2016-12-22	1222F04L	6008.65
comp56496_c0_seq4	F	L	2016-12-22	1222F04L	52.6823
comp56747_c2_seq2	F	L	2016-12-22	1222F04L	2538.33
comp57952_c3_seq2	F	L	2016-12-22	1222F04L	47.893
comp59049_c0_seq1	F	L	2016-12-22	1222F04L	1124.53
comp60397_c0_seq1	F	L	2016-12-22	1222F04L	58.4294
comp62130_c0_seq4	F	L	2016-12-22	1222F04L	2186.79
comp63155_c0_seq11	F	L	2016-12-22	1222F04L	4297.92
comp64021_c3_seq1	F	L	2016-12-22	1222F04L	5395.62
comp65435_c0_seq8	F	L	2016-12-22	1222F04L	569.927
comp65993_c0_seq6	F	L	2016-12-22	1222F04L	1001.92
vitelline egg coat protein	F	L	2016-12-22	1222F04L	6329.54
0_0_CCAG28737.b1_CAYC_CAYF_CCAG	F	H	2016-09-29	0929F01H	661.683
1252_1_CAYC_CAYF_CCAG	F	H	2016-09-29	0929F01H	3384.24
13341_0_CCAG36642.b1_CAYC_CAYF_CCAG	F	H	2016-09-29	0929F01H	556.529
1432_1_CAYC_CAYF_CCAG	F	H	2016-09-29	0929F01H	707.464
14392_1_CAYC_CAYF_CCAG	F	H	2016-09-29	0929F01H	51902.4
14490_0_CCAG5543.g1_CAYC_CAYF_CCAG	F	H	2016-09-29	0929F01H	93.7086
14756_0_CCAG9200.b3_CAYC_CAYF_CCAG	F	H	2016-09-29	0929F01H	3.57667
14_5_CAYC_CAYF_CCAG	F	H	2016-09-29	0929F01H	27.898
178_9_CAYC_CAYF_CCAG	F	H	2016-09-29	0929F01H	21616.6
1837_1_CAYC_CAYF_CCAG	F	H	2016-09-29	0929F01H	9585.46
2202_1_CAYC_CAYF_CCAG	F	H	2016-09-29	0929F01H	10264.3
2758_1_CAYC_CAYF_CCAG	F	H	2016-09-29	0929F01H	9549.7
3397_1_CAYC_CAYF_CCAG	F	H	2016-09-29	0929F01H	1922.1
3924_1_CAYC_CAYF_CCAG	F	H	2016-09-29	0929F01H	92.9933
CCAG48604	F	H	2016-09-29	0929F01H	184326
Vitellogenin_common	F	H	2016-09-29	0929F01H	4796.31
Vitellogenin_unique	F	H	2016-09-29	0929F01H	4394.29
comp50435_c1_seq2	F	H	2016-09-29	0929F01H	1499.34
comp55113_c2_seq1	F	H	2016-09-29	0929F01H	5616.08
comp55834_c0_seq3	F	H	2016-09-29	0929F01H	118.03
comp55959_c0_seq1	F	H	2016-09-29	0929F01H	5195.46
comp56496_c0_seq4	F	H	2016-09-29	0929F01H	57.942
comp56747_c2_seq2	F	H	2016-09-29	0929F01H	1912.09
comp57952_c3_seq2	F	H	2016-09-29	0929F01H	45.7813
comp59049_c0_seq1	F	H	2016-09-29	0929F01H	36418.3
comp60397_c0_seq1	F	H	2016-09-29	0929F01H	130.191
comp62130_c0_seq4	F	H	2016-09-29	0929F01H	2393.5
comp63155_c0_seq11	F	H	2016-09-29	0929F01H	5226.22
comp64021_c3_seq1	F	H	2016-09-29	0929F01H	3777.67
comp65435_c0_seq8	F	H	2016-09-29	0929F01H	479.988
comp65993_c0_seq6	F	H	2016-09-29	0929F01H	1148.82
vitelline egg coat protein	F	H	2016-09-29	0929F01H	7018.85
0_0_CCAG28737.b1_CAYC_CAYF_CCAG	F	H	2016-09-29	0929F02H	563.812
1252_1_CAYC_CAYF_CCAG	F	H	2016-09-29	0929F02H	770.941
13341_0_CCAG36642.b1_CAYC_CAYF_CCAG	F	H	2016-09-29	0929F02H	2181.22
1432_1_CAYC_CAYF_CCAG	F	H	2016-09-29	0929F02H	338.736
14392_1_CAYC_CAYF_CCAG	F	H	2016-09-29	0929F02H	304.339
14490_0_CCAG5543.g1_CAYC_CAYF_CCAG	F	H	2016-09-29	0929F02H	94.9656
14756_0_CCAG9200.b3_CAYC_CAYF_CCAG	F	H	2016-09-29	0929F02H	1289.89
14_5_CAYC_CAYF_CCAG	F	H	2016-09-29	0929F02H	1470.1
178_9_CAYC_CAYF_CCAG	F	H	2016-09-29	0929F02H	8400.34
1837_1_CAYC_CAYF_CCAG	F	H	2016-09-29	0929F02H	3577.29
2202_1_CAYC_CAYF_CCAG	F	H	2016-09-29	0929F02H	7542.66
2758_1_CAYC_CAYF_CCAG	F	H	2016-09-29	0929F02H	10757.3
3397_1_CAYC_CAYF_CCAG	F	H	2016-09-29	0929F02H	2854.2
3924_1_CAYC_CAYF_CCAG	F	H	2016-09-29	0929F02H	2446.67
CCAG48604	F	H	2016-09-29	0929F02H	147022
Vitellogenin_common	F	H	2016-09-29	0929F02H	45.6134
Vitellogenin_unique	F	H	2016-09-29	0929F02H	35.8925
comp50435_c1_seq2	F	H	2016-09-29	0929F02H	31943.6
comp55113_c2_seq1	F	H	2016-09-29	0929F02H	2098.96
comp55834_c0_seq3	F	H	2016-09-29	0929F02H	504.739
comp55959_c0_seq1	F	H	2016-09-29	0929F02H	8623.92
comp56496_c0_seq4	F	H	2016-09-29	0929F02H	38.8836
comp56747_c2_seq2	F	H	2016-09-29	0929F02H	978.819
comp57952_c3_seq2	F	H	2016-09-29	0929F02H	27.6671
comp59049_c0_seq1	F	H	2016-09-29	0929F02H	11035.5
comp60397_c0_seq1	F	H	2016-09-29	0929F02H	172.733
comp62130_c0_seq4	F	H	2016-09-29	0929F02H	2558.09
comp63155_c0_seq11	F	H	2016-09-29	0929F02H	4986.07
comp64021_c3_seq1	F	H	2016-09-29	0929F02H	5442.95
comp65435_c0_seq8	F	H	2016-09-29	0929F02H	392.574
comp65993_c0_seq6	F	H	2016-09-29	0929F02H	2140.84
vitelline egg coat protein	F	H	2016-09-29	0929F02H	4333.27
0_0_CCAG28737.b1_CAYC_CAYF_CCAG	F	H	2016-09-29	0929F03H	471.803
1252_1_CAYC_CAYF_CCAG	F	H	2016-09-29	0929F03H	1966.5
13341_0_CCAG36642.b1_CAYC_CAYF_CCAG	F	H	2016-09-29	0929F03H	1523.94
1432_1_CAYC_CAYF_CCAG	F	H	2016-09-29	0929F03H	566.034
14392_1_CAYC_CAYF_CCAG	F	H	2016-09-29	0929F03H	58817.4
14490_0_CCAG5543.g1_CAYC_CAYF_CCAG	F	H	2016-09-29	0929F03H	74.0848
14756_0_CCAG9200.b3_CAYC_CAYF_CCAG	F	H	2016-09-29	0929F03H	1.9496
14_5_CAYC_CAYF_CCAG	F	H	2016-09-29	0929F03H	15889.2
178_9_CAYC_CAYF_CCAG	F	H	2016-09-29	0929F03H	5295.76
1837_1_CAYC_CAYF_CCAG	F	H	2016-09-29	0929F03H	10035.2
2202_1_CAYC_CAYF_CCAG	F	H	2016-09-29	0929F03H	6170.48
2758_1_CAYC_CAYF_CCAG	F	H	2016-09-29	0929F03H	7637.23
3397_1_CAYC_CAYF_CCAG	F	H	2016-09-29	0929F03H	3010.18
3924_1_CAYC_CAYF_CCAG	F	H	2016-09-29	0929F03H	45.4906
CCAG48604	F	H	2016-09-29	0929F03H	78385.6
Vitellogenin_common	F	H	2016-09-29	0929F03H	219.655
Vitellogenin_unique	F	H	2016-09-29	0929F03H	198.209
comp50435_c1_seq2	F	H	2016-09-29	0929F03H	34210.9
comp55113_c2_seq1	F	H	2016-09-29	0929F03H	4145.5
comp55834_c0_seq3	F	H	2016-09-29	0929F03H	601.776
comp55959_c0_seq1	F	H	2016-09-29	0929F03H	2487.04
comp56496_c0_seq4	F	H	2016-09-29	0929F03H	35.0928
comp56747_c2_seq2	F	H	2016-09-29	0929F03H	1555.13
comp57952_c3_seq2	F	H	2016-09-29	0929F03H	27.2944
comp59049_c0_seq1	F	H	2016-09-29	0929F03H	33392.1
comp60397_c0_seq1	F	H	2016-09-29	0929F03H	380.822
comp62130_c0_seq4	F	H	2016-09-29	0929F03H	1320.53
comp63155_c0_seq11	F	H	2016-09-29	0929F03H	3258.43
comp64021_c3_seq1	F	H	2016-09-29	0929F03H	2489.64
comp65435_c0_seq8	F	H	2016-09-29	0929F03H	754.495
comp65993_c0_seq6	F	H	2016-09-29	0929F03H	1399.81
vitelline egg coat protein	F	H	2016-09-29	0929F03H	1927.5
0_0_CCAG28737.b1_CAYC_CAYF_CCAG	F	H	2016-09-29	0929F04H	711.602
1252_1_CAYC_CAYF_CCAG	F	H	2016-09-29	0929F04H	3203.73
13341_0_CCAG36642.b1_CAYC_CAYF_CCAG	F	H	2016-09-29	0929F04H	1013.31
1432_1_CAYC_CAYF_CCAG	F	H	2016-09-29	0929F04H	1846.05
14392_1_CAYC_CAYF_CCAG	F	H	2016-09-29	0929F04H	46424.1
14490_0_CCAG5543.g1_CAYC_CAYF_CCAG	F	H	2016-09-29	0929F04H	86.0932
14756_0_CCAG9200.b3_CAYC_CAYF_CCAG	F	H	2016-09-29	0929F04H	3.80944
14_5_CAYC_CAYF_CCAG	F	H	2016-09-29	0929F04H	158.473
178_9_CAYC_CAYF_CCAG	F	H	2016-09-29	0929F04H	6874.51
1837_1_CAYC_CAYF_CCAG	F	H	2016-09-29	0929F04H	4388.47
2202_1_CAYC_CAYF_CCAG	F	H	2016-09-29	0929F04H	2277.28
2758_1_CAYC_CAYF_CCAG	F	H	2016-09-29	0929F04H	6101.95
3397_1_CAYC_CAYF_CCAG	F	H	2016-09-29	0929F04H	1625.11
3924_1_CAYC_CAYF_CCAG	F	H	2016-09-29	0929F04H	58.6653
CCAG48604	F	H	2016-09-29	0929F04H	143748
Vitellogenin_common	F	H	2016-09-29	0929F04H	52862.8
Vitellogenin_unique	F	H	2016-09-29	0929F04H	48481.9
comp50435_c1_seq2	F	H	2016-09-29	0929F04H	50423.2
comp55113_c2_seq1	F	H	2016-09-29	0929F04H	1386.63
comp55834_c0_seq3	F	H	2016-09-29	0929F04H	312.374
comp55959_c0_seq1	F	H	2016-09-29	0929F04H	14701.4
comp56496_c0_seq4	F	H	2016-09-29	0929F04H	38.8562
comp56747_c2_seq2	F	H	2016-09-29	0929F04H	1484.92
comp57952_c3_seq2	F	H	2016-09-29	0929F04H	42.6657
comp59049_c0_seq1	F	H	2016-09-29	0929F04H	22173.2
comp60397_c0_seq1	F	H	2016-09-29	0929F04H	650.652
comp62130_c0_seq4	F	H	2016-09-29	0929F04H	4786.17
comp63155_c0_seq11	F	H	2016-09-29	0929F04H	11690.4
comp64021_c3_seq1	F	H	2016-09-29	0929F04H	4918.74
comp65435_c0_seq8	F	H	2016-09-29	0929F04H	413.705
comp65993_c0_seq6	F	H	2016-09-29	0929F04H	1441.49
vitelline egg coat protein	F	H	2016-09-29	0929F04H	2684.89
0_0_CCAG28737.b1_CAYC_CAYF_CCAG	F	H	2016-09-29	0929F05H	1250
1252_1_CAYC_CAYF_CCAG	F	H	2016-09-29	0929F05H	3211.71
13341_0_CCAG36642.b1_CAYC_CAYF_CCAG	F	H	2016-09-29	0929F05H	508.475
1432_1_CAYC_CAYF_CCAG	F	H	2016-09-29	0929F05H	661.488
14392_1_CAYC_CAYF_CCAG	F	H	2016-09-29	0929F05H	45246.4
14490_0_CCAG5543.g1_CAYC_CAYF_CCAG	F	H	2016-09-29	0929F05H	72.9755
14756_0_CCAG9200.b3_CAYC_CAYF_CCAG	F	H	2016-09-29	0929F05H	4.7081
14_5_CAYC_CAYF_CCAG	F	H	2016-09-29	0929F05H	1090.71
178_9_CAYC_CAYF_CCAG	F	H	2016-09-29	0929F05H	41270.4
1837_1_CAYC_CAYF_CCAG	F	H	2016-09-29	0929F05H	10309.2
2202_1_CAYC_CAYF_CCAG	F	H	2016-09-29	0929F05H	2492.15
2758_1_CAYC_CAYF_CCAG	F	H	2016-09-29	0929F05H	10391.6
3397_1_CAYC_CAYF_CCAG	F	H	2016-09-29	0929F05H	1786.72
3924_1_CAYC_CAYF_CCAG	F	H	2016-09-29	0929F05H	54.1431
CCAG48604	F	H	2016-09-29	0929F05H	91481.5
Vitellogenin_common	F	H	2016-09-29	0929F05H	163535
Vitellogenin_unique	F	H	2016-09-29	0929F05H	143194
comp50435_c1_seq2	F	H	2016-09-29	0929F05H	302.103
comp55113_c2_seq1	F	H	2016-09-29	0929F05H	3001.41
comp55834_c0_seq3	F	H	2016-09-29	0929F05H	99.6548
comp55959_c0_seq1	F	H	2016-09-29	0929F05H	10055.7
comp56496_c0_seq4	F	H	2016-09-29	0929F05H	40.0188
comp56747_c2_seq2	F	H	2016-09-29	0929F05H	2448.21
comp57952_c3_seq2	F	H	2016-09-29	0929F05H	65.9134
comp59049_c0_seq1	F	H	2016-09-29	0929F05H	925.926
comp60397_c0_seq1	F	H	2016-09-29	0929F05H	112.994
comp62130_c0_seq4	F	H	2016-09-29	0929F05H	4040.33
comp63155_c0_seq11	F	H	2016-09-29	0929F05H	6952.29
comp64021_c3_seq1	F	H	2016-09-29	0929F05H	4144.7
comp65435_c0_seq8	F	H	2016-09-29	0929F05H	556.34
comp65993_c0_seq6	F	H	2016-09-29	0929F05H	1383.4
vitelline egg coat protein	F	H	2016-09-29	0929F05H	5563.4
0_0_CCAG28737.b1_CAYC_CAYF_CCAG	M	H	2016-09-29	0929M01H	2467.17
1252_1_CAYC_CAYF_CCAG	M	H	2016-09-29	0929M01H	352.028
13341_0_CCAG36642.b1_CAYC_CAYF_CCAG	M	H	2016-09-29	0929M01H	631.667
1432_1_CAYC_CAYF_CCAG	M	H	2016-09-29	0929M01H	402.601
14392_1_CAYC_CAYF_CCAG	M	H	2016-09-29	0929M01H	176.51
14490_0_CCAG5543.g1_CAYC_CAYF_CCAG	M	H	2016-09-29	0929M01H	68.4223
14756_0_CCAG9200.b3_CAYC_CAYF_CCAG	M	H	2016-09-29	0929M01H	2.97488
14_5_CAYC_CAYF_CCAG	M	H	2016-09-29	0929M01H	309.388
178_9_CAYC_CAYF_CCAG	M	H	2016-09-29	0929M01H	84132.7
1837_1_CAYC_CAYF_CCAG	M	H	2016-09-29	0929M01H	8386.19
2202_1_CAYC_CAYF_CCAG	M	H	2016-09-29	0929M01H	9081.33
2758_1_CAYC_CAYF_CCAG	M	H	2016-09-29	0929M01H	12861.4
3397_1_CAYC_CAYF_CCAG	M	H	2016-09-29	0929M01H	1865.25
3924_1_CAYC_CAYF_CCAG	M	H	2016-09-29	0929M01H	182.459
CCAG48604	M	H	2016-09-29	0929M01H	347933
Vitellogenin_common	M	H	2016-09-29	0929M01H	45.6149
Vitellogenin_unique	M	H	2016-09-29	0929M01H	24.7907
comp50435_c1_seq2	M	H	2016-09-29	0929M01H	151.719
comp55113_c2_seq1	M	H	2016-09-29	0929M01H	6538.79
comp55834_c0_seq3	M	H	2016-09-29	0929M01H	38.6735
comp55959_c0_seq1	M	H	2016-09-29	0929M01H	7363.83
comp56496_c0_seq4	M	H	2016-09-29	0929M01H	93.213
comp56747_c2_seq2	M	H	2016-09-29	0929M01H	1580.65
comp57952_c3_seq2	M	H	2016-09-29	0929M01H	70.4056
comp59049_c0_seq1	M	H	2016-09-29	0929M01H	11060.6
comp60397_c0_seq1	M	H	2016-09-29	0929M01H	134.861
comp62130_c0_seq4	M	H	2016-09-29	0929M01H	3837.6
comp63155_c0_seq11	M	H	2016-09-29	0929M01H	7884.43
comp64021_c3_seq1	M	H	2016-09-29	0929M01H	6516.98
comp65435_c0_seq8	M	H	2016-09-29	0929M01H	419.458
comp65993_c0_seq6	M	H	2016-09-29	0929M01H	1196.89
vitelline egg coat protein	M	H	2016-09-29	0929M01H	15702.4
0_0_CCAG28737.b1_CAYC_CAYF_CCAG	M	H	2016-09-29	0929M02H	1725.07
1252_1_CAYC_CAYF_CCAG	M	H	2016-09-29	0929M02H	431.576
13341_0_CCAG36642.b1_CAYC_CAYF_CCAG	M	H	2016-09-29	0929M02H	514.809
1432_1_CAYC_CAYF_CCAG	M	H	2016-09-29	0929M02H	377.321
14392_1_CAYC_CAYF_CCAG	M	H	2016-09-29	0929M02H	110.36
14490_0_CCAG5543.g1_CAYC_CAYF_CCAG	M	H	2016-09-29	0929M02H	55.4884
14756_0_CCAG9200.b3_CAYC_CAYF_CCAG	M	H	2016-09-29	0929M02H	362.524
14_5_CAYC_CAYF_CCAG	M	H	2016-09-29	0929M02H	442.674
178_9_CAYC_CAYF_CCAG	M	H	2016-09-29	0929M02H	103685
1837_1_CAYC_CAYF_CCAG	M	H	2016-09-29	0929M02H	8887.39
2202_1_CAYC_CAYF_CCAG	M	H	2016-09-29	0929M02H	6198.67
2758_1_CAYC_CAYF_CCAG	M	H	2016-09-29	0929M02H	12413.4
3397_1_CAYC_CAYF_CCAG	M	H	2016-09-29	0929M02H	1615.33
3924_1_CAYC_CAYF_CCAG	M	H	2016-09-29	0929M02H	1033.32
CCAG48604	M	H	2016-09-29	0929M02H	148825
Vitellogenin_common	M	H	2016-09-29	0929M02H	24.6615
Vitellogenin_unique	M	H	2016-09-29	0929M02H	20.9623
comp50435_c1_seq2	M	H	2016-09-29	0929M02H	37.6088
comp55113_c2_seq1	M	H	2016-09-29	0929M02H	3273.82
comp55834_c0_seq3	M	H	2016-09-29	0929M02H	11.0977
comp55959_c0_seq1	M	H	2016-09-29	0929M02H	4924.29
comp56496_c0_seq4	M	H	2016-09-29	0929M02H	54.2553
comp56747_c2_seq2	M	H	2016-09-29	0929M02H	1948.88
comp57952_c3_seq2	M	H	2016-09-29	0929M02H	36.3757
comp59049_c0_seq1	M	H	2016-09-29	0929M02H	620.237
comp60397_c0_seq1	M	H	2016-09-29	0929M02H	94.3303
comp62130_c0_seq4	M	H	2016-09-29	0929M02H	2429.16
comp63155_c0_seq11	M	H	2016-09-29	0929M02H	3960.64
comp64021_c3_seq1	M	H	2016-09-29	0929M02H	3527.83
comp65435_c0_seq8	M	H	2016-09-29	0929M02H	388.419
comp65993_c0_seq6	M	H	2016-09-29	0929M02H	1082.02
vitelline egg coat protein	M	H	2016-09-29	0929M02H	4960.66
0_0_CCAG28737.b1_CAYC_CAYF_CCAG	M	H	2016-09-29	0929M03H	1484.59
1252_1_CAYC_CAYF_CCAG	M	H	2016-09-29	0929M03H	751.409
13341_0_CCAG36642.b1_CAYC_CAYF_CCAG	M	H	2016-09-29	0929M03H	629.212
1432_1_CAYC_CAYF_CCAG	M	H	2016-09-29	0929M03H	480.011
14392_1_CAYC_CAYF_CCAG	M	H	2016-09-29	0929M03H	82.3647
14490_0_CCAG5543.g1_CAYC_CAYF_CCAG	M	H	2016-09-29	0929M03H	100.593
14756_0_CCAG9200.b3_CAYC_CAYF_CCAG	M	H	2016-09-29	0929M03H	41.8575
14_5_CAYC_CAYF_CCAG	M	H	2016-09-29	0929M03H	1489.32
178_9_CAYC_CAYF_CCAG	M	H	2016-09-29	0929M03H	17038
1837_1_CAYC_CAYF_CCAG	M	H	2016-09-29	0929M03H	10184.2
2202_1_CAYC_CAYF_CCAG	M	H	2016-09-29	0929M03H	13453.8
2758_1_CAYC_CAYF_CCAG	M	H	2016-09-29	0929M03H	11921.3
3397_1_CAYC_CAYF_CCAG	M	H	2016-09-29	0929M03H	2034.14
3924_1_CAYC_CAYF_CCAG	M	H	2016-09-29	0929M03H	156.628
CCAG48604	M	H	2016-09-29	0929M03H	188186
Vitellogenin_common	M	H	2016-09-29	0929M03H	62.1111
Vitellogenin_unique	M	H	2016-09-29	0929M03H	41.1823
comp50435_c1_seq2	M	H	2016-09-29	0929M03H	1503.49
comp55113_c2_seq1	M	H	2016-09-29	0929M03H	8004.9
comp55834_c0_seq3	M	H	2016-09-29	0929M03H	97.2173
comp55959_c0_seq1	M	H	2016-09-29	0929M03H	5157.92
comp56496_c0_seq4	M	H	2016-09-29	0929M03H	52.6594
comp56747_c2_seq2	M	H	2016-09-29	0929M03H	1541.97
comp57952_c3_seq2	M	H	2016-09-29	0929M03H	40.5072
comp59049_c0_seq1	M	H	2016-09-29	0929M03H	39263.7
comp60397_c0_seq1	M	H	2016-09-29	0929M03H	208.612
comp62130_c0_seq4	M	H	2016-09-29	0929M03H	2554.66
comp63155_c0_seq11	M	H	2016-09-29	0929M03H	5388.14
comp64021_c3_seq1	M	H	2016-09-29	0929M03H	3782.02
comp65435_c0_seq8	M	H	2016-09-29	0929M03H	374.017
comp65993_c0_seq6	M	H	2016-09-29	0929M03H	1109.9
vitelline egg coat protein	M	H	2016-09-29	0929M03H	7314.25
0_0_CCAG28737.b1_CAYC_CAYF_CCAG	M	H	2016-09-29	0929M04H	1547.24
1252_1_CAYC_CAYF_CCAG	M	H	2016-09-29	0929M04H	473.525
13341_0_CCAG36642.b1_CAYC_CAYF_CCAG	M	H	2016-09-29	0929M04H	521.592
1432_1_CAYC_CAYF_CCAG	M	H	2016-09-29	0929M04H	370.246
14392_1_CAYC_CAYF_CCAG	M	H	2016-09-29	0929M04H	276.71
14490_0_CCAG5543.g1_CAYC_CAYF_CCAG	M	H	2016-09-29	0929M04H	48.067
14756_0_CCAG9200.b3_CAYC_CAYF_CCAG	M	H	2016-09-29	0929M04H	142.252
14_5_CAYC_CAYF_CCAG	M	H	2016-09-29	0929M04H	372.194
178_9_CAYC_CAYF_CCAG	M	H	2016-09-29	0929M04H	90480.9
1837_1_CAYC_CAYF_CCAG	M	H	2016-09-29	0929M04H	9921.29
2202_1_CAYC_CAYF_CCAG	M	H	2016-09-29	0929M04H	5286.72
2758_1_CAYC_CAYF_CCAG	M	H	2016-09-29	0929M04H	14973.5
3397_1_CAYC_CAYF_CCAG	M	H	2016-09-29	0929M04H	1753.15
3924_1_CAYC_CAYF_CCAG	M	H	2016-09-29	0929M04H	466.38
CCAG48604	M	H	2016-09-29	0929M04H	169802
Vitellogenin_common	M	H	2016-09-29	0929M04H	35.0759
Vitellogenin_unique	M	H	2016-09-29	0929M04H	24.6831
comp50435_c1_seq2	M	H	2016-09-29	0929M04H	3186.71
comp55113_c2_seq1	M	H	2016-09-29	0929M04H	2394.26
comp55834_c0_seq3	M	H	2016-09-29	0929M04H	60.4085
comp55959_c0_seq1	M	H	2016-09-29	0929M04H	4423.46
comp56496_c0_seq4	M	H	2016-09-29	0929M04H	47.4174
comp56747_c2_seq2	M	H	2016-09-29	0929M04H	2016.22
comp57952_c3_seq2	M	H	2016-09-29	0929M04H	47.4174
comp59049_c0_seq1	M	H	2016-09-29	0929M04H	11519.2
comp60397_c0_seq1	M	H	2016-09-29	0929M04H	98.0827
comp62130_c0_seq4	M	H	2016-09-29	0929M04H	2409.85
comp63155_c0_seq11	M	H	2016-09-29	0929M04H	4624.18
comp64021_c3_seq1	M	H	2016-09-29	0929M04H	3173.72
comp65435_c0_seq8	M	H	2016-09-29	0929M04H	357.255
comp65993_c0_seq6	M	H	2016-09-29	0929M04H	1034.09
vitelline egg coat protein	M	H	2016-09-29	0929M04H	9366.57
0_0_CCAG28737.b1_CAYC_CAYF_CCAG	M	H	2016-09-29	0929M05H	1228.62
1252_1_CAYC_CAYF_CCAG	M	H	2016-09-29	0929M05H	1870.04
13341_0_CCAG36642.b1_CAYC_CAYF_CCAG	M	H	2016-09-29	0929M05H	474.87
1432_1_CAYC_CAYF_CCAG	M	H	2016-09-29	0929M05H	367.966
14392_1_CAYC_CAYF_CCAG	M	H	2016-09-29	0929M05H	66.6213
14490_0_CCAG5543.g1_CAYC_CAYF_CCAG	M	H	2016-09-29	0929M05H	52.6773
14756_0_CCAG9200.b3_CAYC_CAYF_CCAG	M	H	2016-09-29	0929M05H	275.781
14_5_CAYC_CAYF_CCAG	M	H	2016-09-29	0929M05H	838.963
178_9_CAYC_CAYF_CCAG	M	H	2016-09-29	0929M05H	70558.1
1837_1_CAYC_CAYF_CCAG	M	H	2016-09-29	0929M05H	7343.06
2202_1_CAYC_CAYF_CCAG	M	H	2016-09-29	0929M05H	4476.02
2758_1_CAYC_CAYF_CCAG	M	H	2016-09-29	0929M05H	12873.4
3397_1_CAYC_CAYF_CCAG	M	H	2016-09-29	0929M05H	1887.86
3924_1_CAYC_CAYF_CCAG	M	H	2016-09-29	0929M05H	740.581
CCAG48604	M	H	2016-09-29	0929M05H	170827
Vitellogenin_common	M	H	2016-09-29	0929M05H	20.916
Vitellogenin_unique	M	H	2016-09-29	0929M05H	17.0427
comp50435_c1_seq2	M	H	2016-09-29	0929M05H	27.888
comp55113_c2_seq1	M	H	2016-09-29	0929M05H	3268.32
comp55834_c0_seq3	M	H	2016-09-29	0929M05H	16.268
comp55959_c0_seq1	M	H	2016-09-29	0929M05H	11692.8
comp56496_c0_seq4	M	H	2016-09-29	0929M05H	47.2546
comp56747_c2_seq2	M	H	2016-09-29	0929M05H	2035.05
comp57952_c3_seq2	M	H	2016-09-29	0929M05H	85.9879
comp59049_c0_seq1	M	H	2016-09-29	0929M05H	446.208
comp60397_c0_seq1	M	H	2016-09-29	0929M05H	139.44
comp62130_c0_seq4	M	H	2016-09-29	0929M05H	4818.42
comp63155_c0_seq11	M	H	2016-09-29	0929M05H	8424.49
comp64021_c3_seq1	M	H	2016-09-29	0929M05H	4982.65
comp65435_c0_seq8	M	H	2016-09-29	0929M05H	488.04
comp65993_c0_seq6	M	H	2016-09-29	0929M05H	1443.2
vitelline egg coat protein	M	H	2016-09-29	0929M05H	8007.72
0_0_CCAG28737.b1_CAYC_CAYF_CCAG	F	H	2016-12-22	1222F05H	1310.35
1252_1_CAYC_CAYF_CCAG	F	H	2016-12-22	1222F05H	3489.95
13341_0_CCAG36642.b1_CAYC_CAYF_CCAG	F	H	2016-12-22	1222F05H	633.362
1432_1_CAYC_CAYF_CCAG	F	H	2016-12-22	1222F05H	718.995
14392_1_CAYC_CAYF_CCAG	F	H	2016-12-22	1222F05H	52670.8
14490_0_CCAG5543.g1_CAYC_CAYF_CCAG	F	H	2016-12-22	1222F05H	161.572
14756_0_CCAG9200.b3_CAYC_CAYF_CCAG	F	H	2016-12-22	1222F05H	1.61572
14_5_CAYC_CAYF_CCAG	F	H	2016-12-22	1222F05H	1046.99
178_9_CAYC_CAYF_CCAG	F	H	2016-12-22	1222F05H	46665.2
1837_1_CAYC_CAYF_CCAG	F	H	2016-12-22	1222F05H	9725.01
2202_1_CAYC_CAYF_CCAG	F	H	2016-12-22	1222F05H	6073.49
2758_1_CAYC_CAYF_CCAG	F	H	2016-12-22	1222F05H	12922.5
3397_1_CAYC_CAYF_CCAG	F	H	2016-12-22	1222F05H	1900.09
3924_1_CAYC_CAYF_CCAG	F	H	2016-12-22	1222F05H	85.6331
CCAG48604	F	H	2016-12-22	1222F05H	184652
Vitellogenin_common	F	H	2016-12-22	1222F05H	546948
Vitellogenin_unique	F	H	2016-12-22	1222F05H	452204
comp50435_c1_seq2	F	H	2016-12-22	1222F05H	177.729
comp55113_c2_seq1	F	H	2016-12-22	1222F05H	3769.47
comp55834_c0_seq3	F	H	2016-12-22	1222F05H	285.982
comp55959_c0_seq1	F	H	2016-12-22	1222F05H	6404.71
comp56496_c0_seq4	F	H	2016-12-22	1222F05H	64.6287
comp56747_c2_seq2	F	H	2016-12-22	1222F05H	3157.11
comp57952_c3_seq2	F	H	2016-12-22	1222F05H	50.0873
comp59049_c0_seq1	F	H	2016-12-22	1222F05H	3111.87
comp60397_c0_seq1	F	H	2016-12-22	1222F05H	72.7073
comp62130_c0_seq4	F	H	2016-12-22	1222F05H	2627.16
comp63155_c0_seq11	F	H	2016-12-22	1222F05H	5504.75
comp64021_c3_seq1	F	H	2016-12-22	1222F05H	4100.69
comp65435_c0_seq8	F	H	2016-12-22	1222F05H	386.157
comp65993_c0_seq6	F	H	2016-12-22	1222F05H	1227.95
vitelline egg coat protein	F	H	2016-12-22	1222F05H	9080.34
0_0_CCAG28737.b1_CAYC_CAYF_CCAG	F	L	2016-12-22	1222F05L	666.436
1252_1_CAYC_CAYF_CCAG	F	L	2016-12-22	1222F05L	4876.14
13341_0_CCAG36642.b1_CAYC_CAYF_CCAG	F	L	2016-12-22	1222F05L	477.964
1432_1_CAYC_CAYF_CCAG	F	L	2016-12-22	1222F05L	945.374
14392_1_CAYC_CAYF_CCAG	F	L	2016-12-22	1222F05L	85763.7
14490_0_CCAG5543.g1_CAYC_CAYF_CCAG	F	L	2016-12-22	1222F05L	171.886
14756_0_CCAG9200.b3_CAYC_CAYF_CCAG	F	L	2016-12-22	1222F05L	4.52332
14_5_CAYC_CAYF_CCAG	F	L	2016-12-22	1222F05L	924.265
178_9_CAYC_CAYF_CCAG	F	L	2016-12-22	1222F05L	59801.3
1837_1_CAYC_CAYF_CCAG	F	L	2016-12-22	1222F05L	9571.35
2202_1_CAYC_CAYF_CCAG	F	L	2016-12-22	1222F05L	4713.3
2758_1_CAYC_CAYF_CCAG	F	L	2016-12-22	1222F05L	13438.8
3397_1_CAYC_CAYF_CCAG	F	L	2016-12-22	1222F05L	2059.62
3924_1_CAYC_CAYF_CCAG	F	L	2016-12-22	1222F05L	90.4664
CCAG48604	F	L	2016-12-22	1222F05L	114137
Vitellogenin_common	F	L	2016-12-22	1222F05L	559832
Vitellogenin_unique	F	L	2016-12-22	1222F05L	480803
comp50435_c1_seq2	F	L	2016-12-22	1222F05L	137.207
comp55113_c2_seq1	F	L	2016-12-22	1222F05L	2953.73
comp55834_c0_seq3	F	L	2016-12-22	1222F05L	298.539
comp55959_c0_seq1	F	L	2016-12-22	1222F05L	4331.83
comp56496_c0_seq4	F	L	2016-12-22	1222F05L	54.2799
comp56747_c2_seq2	F	L	2016-12-22	1222F05L	2118.42
comp57952_c3_seq2	F	L	2016-12-22	1222F05L	42.2177
comp59049_c0_seq1	F	L	2016-12-22	1222F05L	2543.61
comp60397_c0_seq1	F	L	2016-12-22	1222F05L	107.052
comp62130_c0_seq4	F	L	2016-12-22	1222F05L	1821.39
comp63155_c0_seq11	F	L	2016-12-22	1222F05L	3976
comp64021_c3_seq1	F	L	2016-12-22	1222F05L	4161.46
comp65435_c0_seq8	F	L	2016-12-22	1222F05L	453.84
comp65993_c0_seq6	F	L	2016-12-22	1222F05L	990.607
vitelline egg coat protein	F	L	2016-12-22	1222F05L	5535.04
0_0_CCAG28737.b1_CAYC_CAYF_CCAG	F	L	2016-09-29	0929F01L	1819.03
1252_1_CAYC_CAYF_CCAG	F	L	2016-09-29	0929F01L	3735.98
13341_0_CCAG36642.b1_CAYC_CAYF_CCAG	F	L	2016-09-29	0929F01L	592.513
1432_1_CAYC_CAYF_CCAG	F	L	2016-09-29	0929F01L	681.306
14392_1_CAYC_CAYF_CCAG	F	L	2016-09-29	0929F01L	61692.7
14490_0_CCAG5543.g1_CAYC_CAYF_CCAG	F	L	2016-09-29	0929F01L	93.773
14756_0_CCAG9200.b3_CAYC_CAYF_CCAG	F	L	2016-09-29	0929F01L	1.6597
14_5_CAYC_CAYF_CCAG	F	L	2016-09-29	0929F01L	36.5134
178_9_CAYC_CAYF_CCAG	F	L	2016-09-29	0929F01L	15026.9
1837_1_CAYC_CAYF_CCAG	F	L	2016-09-29	0929F01L	16267.5
2202_1_CAYC_CAYF_CCAG	F	L	2016-09-29	0929F01L	7139.19
2758_1_CAYC_CAYF_CCAG	F	L	2016-09-29	0929F01L	9353.23
3397_1_CAYC_CAYF_CCAG	F	L	2016-09-29	0929F01L	1942.68
3924_1_CAYC_CAYF_CCAG	F	L	2016-09-29	0929F01L	82.9849
CCAG48604	F	L	2016-09-29	0929F01L	174756
Vitellogenin_common	F	L	2016-09-29	0929F01L	44546.3
Vitellogenin_unique	F	L	2016-09-29	0929F01L	40440.2
comp50435_c1_seq2	F	L	2016-09-29	0929F01L	2308.64
comp55113_c2_seq1	F	L	2016-09-29	0929F01L	4231.4
comp55834_c0_seq3	F	L	2016-09-29	0929F01L	204.973
comp55959_c0_seq1	F	L	2016-09-29	0929F01L	5940.89
comp56496_c0_seq4	F	L	2016-09-29	0929F01L	60.579
comp56747_c2_seq2	F	L	2016-09-29	0929F01L	2130.22
comp57952_c3_seq2	F	L	2016-09-29	0929F01L	43.982
comp59049_c0_seq1	F	L	2016-09-29	0929F01L	54880.4
comp60397_c0_seq1	F	L	2016-09-29	0929F01L	152.692
comp62130_c0_seq4	F	L	2016-09-29	0929F01L	2584.98
comp63155_c0_seq11	F	L	2016-09-29	0929F01L	6093.58
comp64021_c3_seq1	F	L	2016-09-29	0929F01L	3499.48
comp65435_c0_seq8	F	L	2016-09-29	0929F01L	528.614
comp65993_c0_seq6	F	L	2016-09-29	0929F01L	1136.06
vitelline egg coat protein	F	L	2016-09-29	0929F01L	6173.25
0_0_CCAG28737.b1_CAYC_CAYF_CCAG	F	L	2016-09-29	0929F02L	3141.29
1252_1_CAYC_CAYF_CCAG	F	L	2016-09-29	0929F02L	5775.74
13341_0_CCAG36642.b1_CAYC_CAYF_CCAG	F	L	2016-09-29	0929F02L	588.527
1432_1_CAYC_CAYF_CCAG	F	L	2016-09-29	0929F02L	651.65
14392_1_CAYC_CAYF_CCAG	F	L	2016-09-29	0929F02L	52247.1
14490_0_CCAG5543.g1_CAYC_CAYF_CCAG	F	L	2016-09-29	0929F02L	193.082
14756_0_CCAG9200.b3_CAYC_CAYF_CCAG	F	L	2016-09-29	0929F02L	1.85655
14_5_CAYC_CAYF_CCAG	F	L	2016-09-29	0929F02L	720.343
178_9_CAYC_CAYF_CCAG	F	L	2016-09-29	0929F02L	59782.9
1837_1_CAYC_CAYF_CCAG	F	L	2016-09-29	0929F02L	7418.79
2202_1_CAYC_CAYF_CCAG	F	L	2016-09-29	0929F02L	4479.86
2758_1_CAYC_CAYF_CCAG	F	L	2016-09-29	0929F02L	12075
3397_1_CAYC_CAYF_CCAG	F	L	2016-09-29	0929F02L	1620.77
3924_1_CAYC_CAYF_CCAG	F	L	2016-09-29	0929F02L	96.5408
CCAG48604	F	L	2016-09-29	0929F02L	165831
Vitellogenin_common	F	L	2016-09-29	0929F02L	675629
Vitellogenin_unique	F	L	2016-09-29	0929F02L	520390
comp50435_c1_seq2	F	L	2016-09-29	0929F02L	204.221
comp55113_c2_seq1	F	L	2016-09-29	0929F02L	3063.31
comp55834_c0_seq3	F	L	2016-09-29	0929F02L	345.319
comp55959_c0_seq1	F	L	2016-09-29	0929F02L	5890.84
comp56496_c0_seq4	F	L	2016-09-29	0929F02L	53.84
comp56747_c2_seq2	F	L	2016-09-29	0929F02L	2018.07
comp57952_c3_seq2	F	L	2016-09-29	0929F02L	48.2704
comp59049_c0_seq1	F	L	2016-09-29	0929F02L	2478.5
comp60397_c0_seq1	F	L	2016-09-29	0929F02L	124.389
comp62130_c0_seq4	F	L	2016-09-29	0929F02L	2606.6
comp63155_c0_seq11	F	L	2016-09-29	0929F02L	5911.26
comp64021_c3_seq1	F	L	2016-09-29	0929F02L	3332.51
comp65435_c0_seq8	F	L	2016-09-29	0929F02L	456.712
comp65993_c0_seq6	F	L	2016-09-29	0929F02L	1383.13
vitelline egg coat protein	F	L	2016-09-29	0929F02L	7448.49
0_0_CCAG28737.b1_CAYC_CAYF_CCAG	F	L	2016-09-29	0929F03L	1645.94
1252_1_CAYC_CAYF_CCAG	F	L	2016-09-29	0929F03L	3014.46
13341_0_CCAG36642.b1_CAYC_CAYF_CCAG	F	L	2016-09-29	0929F03L	543.868
1432_1_CAYC_CAYF_CCAG	F	L	2016-09-29	0929F03L	581.812
14392_1_CAYC_CAYF_CCAG	F	L	2016-09-29	0929F03L	43023.8
14490_0_CCAG5543.g1_CAYC_CAYF_CCAG	F	L	2016-09-29	0929F03L	46.3764
14756_0_CCAG9200.b3_CAYC_CAYF_CCAG	F	L	2016-09-29	0929F03L	2.52962
14_5_CAYC_CAYF_CCAG	F	L	2016-09-29	0929F03L	886.21
178_9_CAYC_CAYF_CCAG	F	L	2016-09-29	0929F03L	44866.2
1837_1_CAYC_CAYF_CCAG	F	L	2016-09-29	0929F03L	7095.58
2202_1_CAYC_CAYF_CCAG	F	L	2016-09-29	0929F03L	4198.32
2758_1_CAYC_CAYF_CCAG	F	L	2016-09-29	0929F03L	12537.6
3397_1_CAYC_CAYF_CCAG	F	L	2016-09-29	0929F03L	1743.75
3924_1_CAYC_CAYF_CCAG	F	L	2016-09-29	0929F03L	69.1429
CCAG48604	F	L	2016-09-29	0929F03L	167608
[truncated: 3,121 more rows]
